# Supplementary material for: Signatures of RNA binding proteins globally coupled to effective microRNA target sites
Source: HighWire-hosted journal article supplement (doi:10.1101/gr.103259.109), 2010-05-27
Supplement: Table_S13.zip [file BOQUEST_CD31PLUS_VS_CD31MINUS_DN.xls]

NAME	PROBE	GENE SYMBOL	GENE_TITLE	RANK IN GENE LIST	RANK METRIC SCORE	RUNNING ES	CORE ENRICHMENT
row_0	GAS1	null	null	59	3.699057102203369	-0.0013133336	No
row_1	MRC2	null	null	177	3.699057102203369	-0.011146056	No
row_2	ELOVL2	null	null	331	3.221935987472534	-0.026266675	No
row_3	PLAGL1	null	null	411	3.096997022628784	-0.030517729	No
row_4	FZD7	null	null	430	3.096997022628784	-0.025808737	No
row_5	SOX9	null	null	481	2.9209060668945312	-0.025800096	No
row_6	SHOX2	null	null	486	2.9209060668945312	-0.019034699	No
row_7	DCX	null	null	524	2.853959083557129	-0.01711654	No
row_8	IGF1	null	null	632	2.699057102203369	-0.0254804	No
row_9	SLC39A14	null	null	712	2.585114002227783	-0.029731456	No
row_10	PLA2G4A	null	null	923	2.3373289108276367	-0.05322458	No
row_11	SLC22A3	null	null	997	2.251899003982544	-0.056594316	No
row_12	FLRT2	null	null	1192	2.075808048248291	-0.07773726	No
row_13	MEST	null	null	1333	1.9666630029678345	-0.09094836	No
row_14	GPC4	null	null	1608	1.7905720472335815	-0.12384219	No
row_15	TWIST1	null	null	1727	1.7305740118026733	-0.1338218	No
row_16	NT5E	null	null	1743	1.7259290218353271	-0.12867214	No
row_17	ABCA6	null	null	1753	1.7167860269546509	-0.122641176	No
row_18	NTRK2	null	null	2083	1.5529290437698364	-0.16361374	No
row_19	ACOX2	null	null	2132	1.5317399501800537	-0.16331132	No
row_20	SVEP1	null	null	2188	1.5059319734573364	-0.16403711	No
row_21	CUGBP2	null	null	2199	1.5003999471664429	-0.15815303	No
row_22	ALDH1A1	null	null	2212	1.4949369430541992	-0.15256272	No
row_23	WNT5A	null	null	2257	1.4711699485778809	-0.15167277	No
row_24	CRYAB	null	null	2307	1.4560190439224243	-0.15151724	No
row_25	EGFR	null	null	2330	1.4462039470672607	-0.14739579	No
row_26	MITF	null	null	2367	1.431885004043579	-0.14533074	No
row_27	PLN	null	null	2389	1.4248989820480347	-0.14106241	No
row_28	PTGIS	null	null	2405	1.4203029870986938	-0.13591276	No
row_29	HOXC6	null	null	2532	1.3706769943237305	-0.14706746	No
row_30	CDH11	null	null	2670	1.317039966583252	-0.1598379	No
row_31	CXCL12	null	null	2718	1.3028579950332642	-0.1593886	No
row_32	ADCY7	null	null	2725	1.2976560592651367	-0.15291697	No
row_33	GALNT12	null	null	2771	1.2824159860610962	-0.1521739	No
row_34	PDGFRA	null	null	2865	1.2503509521484375	-0.15848136	No
row_35	GSTM3	null	null	2918	1.2351640462875366	-0.1587665	No
row_36	FBN1	null	null	2955	1.2219359874725342	-0.15670145	No
row_37	PDGFRL	null	null	2960	1.2204899787902832	-0.14993605	No
row_38	PTPRD	null	null	3031	1.2021269798278809	-0.15286513	No
row_39	COL16A1	null	null	3157	1.166301965713501	-0.16387294	No
row_40	ABCA8	null	null	3196	1.1525139808654785	-0.16210167	No
row_41	LIF	null	null	3224	1.1463890075683594	-0.15871465	No
row_42	LTBP2	null	null	3314	1.1215649843215942	-0.16443457	No
row_43	COL1A1	null	null	3446	1.0852149724960327	-0.1763237	No
row_44	CHRDL1	null	null	3569	1.0497219562530518	-0.18689084	Yes
row_45	TSPAN8	null	null	3616	1.0334759950637817	-0.18629466	Yes
row_46	SEMA3C	null	null	3638	1.02695894241333	-0.18202633	Yes
row_47	SFRP4	null	null	3645	1.026036024093628	-0.1755547	Yes
row_48	COL3A1	null	null	3651	1.0241960287094116	-0.1689362	Yes
row_49	UST	null	null	3674	1.0187209844589233	-0.16481474	Yes
row_50	LUM	null	null	3690	1.0124210119247437	-0.1596651	Yes
row_51	TNFAIP6	null	null	3692	1.0115280151367188	-0.15245904	Yes
row_52	GFPT2	null	null	3736	0.9974889755249023	-0.15142219	Yes
row_53	FMOD	null	null	3794	0.9838889837265015	-0.15244175	Yes
row_54	HDAC4	null	null	3823	0.9756010174751282	-0.14920162	Yes
row_55	OLFML2B	null	null	3866	0.9666630029678345	-0.14801788	Yes
row_56	ROR1	null	null	3882	0.9618639945983887	-0.14286824	Yes
row_57	COL5A2	null	null	3923	0.9493209719657898	-0.14139074	Yes
row_58	FBLN5	null	null	4016	0.926002025604248	-0.14755131	Yes
row_59	HNMT	null	null	4023	0.9252700209617615	-0.14107968	Yes
row_60	GDF10	null	null	4056	0.9165840148925781	-0.1384271	Yes
row_61	BMPR1A	null	null	4109	0.8990269899368286	-0.13871223	Yes
row_62	MAN1C1	null	null	4127	0.8949170112609863	-0.13385636	Yes
row_63	PCOLCE2	null	null	4208	0.8775429725646973	-0.13825428	Yes
row_64	CDKN2C	null	null	4219	0.8742799758911133	-0.1323702	Yes
row_65	THBS2	null	null	4246	0.8684679865837097	-0.1288363	Yes
row_66	MFAP5	null	null	4352	0.8435379862785339	-0.1369064	Yes
row_67	PTPRG	null	null	4358	0.8423280119895935	-0.13028789	Yes
row_68	ANGPT1	null	null	4387	0.8369250297546387	-0.12704775	Yes
row_69	OGT	null	null	4508	0.8114399909973145	-0.13732113	Yes
row_70	NPY1R	null	null	4511	0.8108770251274109	-0.13026196	Yes
row_71	PRELP	null	null	4560	0.7959669828414917	-0.12995955	Yes
row_72	MAFB	null	null	4572	0.792182981967926	-0.12422235	Yes
row_73	TNC	null	null	4608	0.785772979259491	-0.122010425	Yes
row_74	CXCL14	null	null	4702	0.7595379948616028	-0.12831788	Yes
row_75	NOVA1	null	null	4707	0.7590389847755432	-0.12155248	Yes
row_76	ATP8B4	null	null	4840	0.7268540263175964	-0.1335885	Yes
row_77	ITGBL1	null	null	4853	0.7245450019836426	-0.12799819	Yes
row_78	COL6A3	null	null	4869	0.7190529704093933	-0.12284853	Yes
row_79	SRPX	null	null	4976	0.6934469938278198	-0.13106552	Yes
row_80	ROBO1	null	null	5000	0.6874859929084778	-0.12709095	Yes
row_81	C5ORF15	null	null	5004	0.6866409778594971	-0.12017867	Yes
row_82	IGFBP3	null	null	5054	0.6758040189743042	-0.12002314	Yes
row_83	C7	null	null	5071	0.6696730256080627	-0.11502037	Yes
row_84	C22ORF9	null	null	5086	0.6648300290107727	-0.109723836	Yes
row_85	MEIS1	null	null	5145	0.6502270102500916	-0.110890284	Yes
row_86	CDO1	null	null	5154	0.6486769914627075	-0.104712434	Yes
row_87	CRISPLD2	null	null	5310	0.6148380041122437	-0.12012682	Yes
row_88	PPP4R2	null	null	5313	0.6144809722900391	-0.11306766	Yes
row_89	GLT8D2	null	null	5344	0.6070380210876465	-0.110121295	Yes
row_90	CHL1	null	null	5362	0.6028419733047485	-0.105265416	Yes
row_91	SERPINE2	null	null	5377	0.6000670194625854	-0.09996888	Yes
row_92	NET1	null	null	5406	0.593205988407135	-0.09672874	Yes
row_93	AGL	null	null	5413	0.5928660035133362	-0.09025712	Yes
row_94	MXRA5	null	null	5513	0.5700119733810425	-0.09744589	Yes
row_95	COLEC12	null	null	5584	0.5538600087165833	-0.100374974	Yes
row_96	WDR41	null	null	5588	0.5532389879226685	-0.09346269	Yes
row_97	RHOBTB3	null	null	5603	0.5492219924926758	-0.088166155	Yes
row_98	COL14A1	null	null	5615	0.5455470085144043	-0.08242896	Yes
row_99	DKK2	null	null	5634	0.5409960150718689	-0.077719964	Yes
row_100	MEIS2	null	null	5657	0.5344070196151733	-0.07359852	Yes
row_101	PDGFD	null	null	5664	0.5326269865036011	-0.06712689	Yes
row_102	F3	null	null	5770	0.5087249875068665	-0.07519698	Yes
row_103	PRRX1	null	null	5781	0.506767988204956	-0.0693129	Yes
row_104	CD302	null	null	5792	0.5050979852676392	-0.06342882	Yes
row_105	FAM69A	null	null	5901	0.47999700903892517	-0.071939565	Yes
row_106	KCND2	null	null	5979	0.4605090022087097	-0.07589685	Yes
row_107	IRS1	null	null	6010	0.45428499579429626	-0.07295049	Yes
row_108	DZIP1	null	null	6024	0.45231199264526367	-0.067507066	Yes
row_109	COL1A2	null	null	6085	0.4389849901199341	-0.06896728	Yes
row_110	SCRN1	null	null	6187	0.41260001063346863	-0.076449834	Yes
row_111	OMD	null	null	6255	0.3909189999103546	-0.07893825	Yes
row_112	ANK2	null	null	6278	0.384768009185791	-0.0748168	Yes
row_113	PLP1	null	null	6290	0.38120201230049133	-0.06907961	Yes
row_114	MGP	null	null	6308	0.3766309916973114	-0.06422373	Yes
row_115	GRIA3	null	null	6331	0.3719019889831543	-0.06010228	Yes
row_116	EFEMP1	null	null	6386	0.357028990983963	-0.060681187	Yes
row_117	SUSD5	null	null	6406	0.35016798973083496	-0.056119077	Yes
row_118	CCRL1	null	null	6450	0.336573988199234	-0.055082235	Yes
row_119	MBP	null	null	6512	0.31957000494003296	-0.05668934	Yes
row_120	BHLHB3	null	null	6558	0.30548200011253357	-0.055946272	Yes
row_121	SSPN	null	null	6577	0.3004229962825775	-0.051237278	Yes
row_122	ECM2	null	null	6585	0.29748401045799255	-0.04491254	Yes
row_123	IRS2	null	null	6599	0.2925170063972473	-0.039469115	Yes
row_124	CD44	null	null	6604	0.2909870147705078	-0.03270372	Yes
row_125	RECK	null	null	6615	0.28811100125312805	-0.026819637	Yes
row_126	PTGFR	null	null	6696	0.26067298650741577	-0.031217577	Yes
row_127	ADH1B	null	null	6753	0.23411999642848969	-0.032090254	Yes
row_128	SDC2	null	null	6766	0.22791199386119843	-0.026499944	Yes
row_129	ABI3BP	null	null	6780	0.22324000298976898	-0.02105652	Yes
row_130	NOTCH2	null	null	6786	0.22077900171279907	-0.014438009	Yes
row_131	LRP1B	null	null	6821	0.20811599493026733	-0.012079192	Yes
row_132	CYBRD1	null	null	6826	0.20643599331378937	-0.0053137955	Yes
row_133	SPOCK1	null	null	6830	0.20490199327468872	0.0015984877	Yes
row_134	OGN	null	null	6835	0.20323500037193298	0.008363885	Yes
row_135	NOTCH2NL	null	null	6918	0.12064699828624725	0.003672173	Yes
