# Supplementary material for: Signatures of RNA binding proteins globally coupled to effective microRNA target sites
Source: HighWire-hosted journal article supplement (doi:10.1101/gr.103259.109), 2010-05-27
Supplement: Table_S13.zip [file BOQUEST_CD31PLUS_VS_CD31MINUS_UP.xls]

NAME	PROBE	GENE SYMBOL	GENE_TITLE	RANK IN GENE LIST	RANK METRIC SCORE	RUNNING ES	CORE ENRICHMENT
row_0	SEPT11	null	null	26	3.699057102203369	-6.0322514E-4	No
row_1	SOX4	null	null	53	3.699057102203369	-0.0012064503	No
row_2	MCF2L	null	null	107	3.699057102203369	-0.0058747157	No
row_3	CARD8	null	null	109	3.699057102203369	-0.0027140146	No
row_4	SPTLC2	null	null	141	3.699057102203369	-0.004070025	No
row_5	CD93	null	null	168	3.699057102203369	-0.00467325	No
row_6	PTPRE	null	null	221	3.398026943206787	-0.009190959	No
row_7	FAM13A1	null	null	243	3.398026943206787	-0.009041399	No
row_8	CLIC2	null	null	268	3.398026943206787	-0.00934351	No
row_9	COL4A5	null	null	280	3.398026943206787	-0.007688379	No
row_10	KLF9	null	null	327	3.221935987472534	-0.011302745	No
row_11	ELOVL2	null	null	331	3.221935987472534	-0.008443158	No
row_12	SELE	null	null	357	3.221935987472534	-0.0088958265	No
row_13	NFIB	null	null	389	3.096997022628784	-0.010251837	No
row_14	KLHL24	null	null	391	3.096997022628784	-0.0070911353	No
row_15	PIK3R1	null	null	428	3.096997022628784	-0.009199931	No
row_16	FGL2	null	null	446	3.000087022781372	-0.008448143	No
row_17	SLC7A5	null	null	468	3.000087022781372	-0.008298582	No
row_18	ST6GAL1	null	null	504	2.9209060668945312	-0.010256821	No
row_19	DCX	null	null	524	2.853959083557129	-0.009806147	No
row_20	MARK1	null	null	591	2.744813919067383	-0.016431654	No
row_21	IER5	null	null	600	2.744813919067383	-0.014324852	No
row_22	IGF1	null	null	632	2.699057102203369	-0.015680863	No
row_23	MYBL1	null	null	659	2.6576640605926514	-0.016284088	No
row_24	PRKAR2B	null	null	700	2.585114002227783	-0.018995112	No
row_25	SPATA6	null	null	749	2.522965908050537	-0.022910593	No
row_26	CDKN1C	null	null	751	2.522965908050537	-0.019749891	No
row_27	CRLF1	null	null	757	2.522965908050537	-0.017191418	No
row_28	NRIP1	null	null	761	2.522965908050537	-0.014331831	No
row_29	MAF	null	null	764	2.522965908050537	-0.011321687	No
row_30	RHOB	null	null	788	2.494936943054199	-0.01147324	No
row_31	EDNRB	null	null	794	2.4686079025268555	-0.008914768	No
row_32	EPHA3	null	null	813	2.44378399848938	-0.008313537	No
row_33	CYP1B1	null	null	829	2.44378399848938	-0.007260634	No
row_34	ING1	null	null	834	2.44378399848938	-0.004551604	No
row_35	MET	null	null	868	2.398026943206787	-0.0062087285	No
row_36	SERPINE1	null	null	879	2.376837968826294	-0.0044030407	No
row_37	TNFAIP3	null	null	942	2.3188459873199463	-0.01042632	No
row_38	ABCG1	null	null	963	2.2840840816497803	-0.010126202	No
row_39	CYLD	null	null	965	2.2840840816497803	-0.0069655012	No
row_40	LRRC8B	null	null	975	2.2840840816497803	-0.005009257	No
row_41	WSB2	null	null	981	2.267693042755127	-0.0024507837	No
row_42	PODXL	null	null	982	2.267693042755127	8.6047465E-4	No
row_43	MTSS1	null	null	993	2.251899003982544	0.0026661623	No
row_44	TPD52L1	null	null	1024	2.221935987472534	0.001460709	No
row_45	FNBP1L	null	null	1083	2.1675779819488525	-0.0039603417	No
row_46	AKAP13	null	null	1114	2.142754077911377	-0.0051657953	No
row_47	ITGA4	null	null	1116	2.142754077911377	-0.002005094	No
row_48	THBD	null	null	1121	2.142754077911377	7.039361E-4	No
row_49	TGFBR3	null	null	1126	2.130855083465576	0.0034129662	No
row_50	TSPAN7	null	null	1204	2.075808048248291	-0.004868669	No
row_51	FLNC	null	null	1213	2.0655879974365234	-0.002761867	No
row_52	GMFG	null	null	1252	2.036298990249634	-0.0051717767	No
row_53	METTL7A	null	null	1418	1.9066649675369263	-0.026702432	No
row_54	NEK7	null	null	1425	1.8997160196304321	-0.024294516	No
row_55	IL6R	null	null	1504	1.8539589643478394	-0.03272671	No
row_56	RPS6KA2	null	null	1578	1.806962013244629	-0.040406115	No
row_57	SLC38A1	null	null	1580	1.806962013244629	-0.037245415	No
row_58	COL18A1	null	null	1593	1.7959669828414917	-0.03574084	No
row_59	ID1	null	null	1639	1.7747780084609985	-0.03920465	No
row_60	IARS	null	null	1650	1.769637942314148	-0.03739896	No
row_61	ENPEP	null	null	1677	1.7595380544662476	-0.038002186	No
row_62	C1QTNF3	null	null	1683	1.7595380544662476	-0.035443716	No
row_63	CD2AP	null	null	1685	1.754573941230774	-0.03228301	No
row_64	ABCA6	null	null	1753	1.7167860269546509	-0.039059076	No
row_65	ADAM10	null	null	1759	1.7167860269546509	-0.036500603	No
row_66	ASPM	null	null	1770	1.712285041809082	-0.034694918	No
row_67	SLC19A2	null	null	1817	1.6862200498580933	-0.038309284	No
row_68	GFPT1	null	null	1830	1.6778680086135864	-0.03680471	No
row_69	FMO3	null	null	1844	1.6737509965896606	-0.035450693	No
row_70	ZC3HAV1	null	null	1874	1.6576639413833618	-0.036505587	No
row_71	MELK	null	null	1876	1.6537339687347412	-0.033344887	No
row_72	MAOA	null	null	1885	1.6498390436172485	-0.031238087	No
row_73	PHLDA1	null	null	1921	1.627174973487854	-0.033196323	No
row_74	C12ORF5	null	null	1938	1.6198760271072388	-0.03229398	No
row_75	CXCL10	null	null	1971	1.6056350469589233	-0.033800546	No
row_76	CXCL3	null	null	2012	1.5851140022277832	-0.03651157	No
row_77	CXCR7	null	null	2077	1.556041955947876	-0.042835962	No
row_78	NTRK2	null	null	2083	1.5529290437698364	-0.040277492	No
row_79	KIAA0090	null	null	2084	1.5529290437698364	-0.03696623	No
row_80	F11R	null	null	2088	1.5498379468917847	-0.034106646	No
row_81	SOX5	null	null	2169	1.5143649578094482	-0.04283995	No
row_82	SULF1	null	null	2191	1.5031570196151733	-0.042690393	No
row_83	CUGBP2	null	null	2199	1.5003999471664429	-0.04043303	No
row_84	TMEM135	null	null	2239	1.4842129945755005	-0.042993497	No
row_85	KCNK2	null	null	2243	1.478948950767517	-0.040133912	No
row_86	RAPGEF5	null	null	2245	1.478948950767517	-0.036973212	No
row_87	WNT5A	null	null	2257	1.4711699485778809	-0.03531808	No
row_88	LCP2	null	null	2271	1.466060996055603	-0.033964064	No
row_89	EGFR	null	null	2330	1.4462039470672607	-0.039385114	No
row_90	WNT11	null	null	2332	1.4437839984893799	-0.036224414	No
row_91	SLC7A11	null	null	2364	1.431885004043579	-0.037580423	No
row_92	MITF	null	null	2367	1.431885004043579	-0.03457028	No
row_93	STC2	null	null	2485	1.3873029947280884	-0.048874196	No
row_94	GFOD1	null	null	2499	1.3809939622879028	-0.04752018	No
row_95	SSH1	null	null	2603	1.3392210006713867	-0.0597163	No
row_96	GREM1	null	null	2625	1.333569049835205	-0.059566736	No
row_97	TNFRSF1B	null	null	2637	1.3279889822006226	-0.05791161	No
row_98	HLA-F	null	null	2663	1.3188459873199463	-0.058364276	No
row_99	ESR1	null	null	2707	1.3063600063323975	-0.06152697	No
row_100	SLC2A3	null	null	2714	1.3046050071716309	-0.059119053	No
row_101	IL15RA	null	null	2754	1.2857569456100464	-0.06167952	No
row_102	FN1	null	null	2821	1.2628940343856812	-0.06830503	No
row_103	MYC	null	null	2825	1.2628940343856812	-0.06544544	No
row_104	MX2	null	null	2866	1.2503509521484375	-0.068156466	No
row_105	RUNX1T1	null	null	2881	1.2457389831542969	-0.066953	No
row_106	IGSF3	null	null	2885	1.244212031364441	-0.06409342	No
row_107	NPR3	null	null	2923	1.2336740493774414	-0.06635277	No
row_108	LMO7	null	null	2938	1.229235053062439	-0.065149315	No
row_109	PDGFRL	null	null	2960	1.2204899787902832	-0.06499975	No
row_110	PTPRB	null	null	2978	1.2161829471588135	-0.064247966	No
row_111	PTPRD	null	null	3031	1.2021269798278809	-0.06876567	No
row_112	PIK3R3	null	null	3084	1.1871730089187622	-0.07328338	No
row_113	KIF13B	null	null	3161	1.1637630462646484	-0.08141446	No
row_114	REL	null	null	3174	1.1599810123443604	-0.07990988	No
row_115	CREM	null	null	3195	1.153749942779541	-0.07960977	No
row_116	GATA2	null	null	3228	1.1451740264892578	-0.08111633	No
row_117	BAALC	null	null	3235	1.143962025642395	-0.07870842	No
row_118	PELI1	null	null	3250	1.1391500234603882	-0.07750496	No
row_119	IL18R1	null	null	3272	1.1320300102233887	-0.0773554	No
row_120	ADAMTS9	null	null	3316	1.1204179525375366	-0.0805181	No
row_121	FGF2	null	null	3349	1.112470030784607	-0.08202466	No
row_122	MYLIP	null	null	3366	1.1057709455490112	-0.08112232	No
row_123	DNM3	null	null	3368	1.1057709455490112	-0.077961616	No
row_124	MEOX1	null	null	3425	1.0894620418548584	-0.08308155	No
row_125	PLA1A	null	null	3433	1.0883970260620117	-0.0808242	No
row_126	SCARF1	null	null	3476	1.0727159976959229	-0.08383633	No
row_127	ELTD1	null	null	3500	1.0686290264129639	-0.083987884	No
row_128	RAP1GDS1	null	null	3519	1.0635730028152466	-0.08338665	No
row_129	FLI1	null	null	3524	1.06256902217865	-0.08067762	No
row_130	CHRDL1	null	null	3569	1.0497219562530518	-0.08399088	No
row_131	NR5A2	null	null	3581	1.0439180135726929	-0.08233575	No
row_132	SEMA6A	null	null	3594	1.0410449504852295	-0.08083117	No
row_133	TSPAN8	null	null	3616	1.0334759950637817	-0.080681615	No
row_134	ITM2A	null	null	3634	1.0278840065002441	-0.07992982	No
row_135	TPX2	null	null	3635	1.0278840065002441	-0.07661857	No
row_136	HLF	null	null	3673	1.0187209844589233	-0.07887792	No
row_137	TNFAIP6	null	null	3692	1.0115280151367188	-0.07827669	No
row_138	ACACB	null	null	3744	0.995764970779419	-0.08264384	No
row_139	KIAA1462	null	null	3780	0.9872499704360962	-0.08460208	No
row_140	GUCY1A3	null	null	3824	0.9756010174751282	-0.08776477	No
row_141	FAM107A	null	null	3836	0.9715160131454468	-0.08610964	No
row_142	TACSTD2	null	null	3855	0.9682750105857849	-0.085508406	No
row_143	SMAD1	null	null	4003	0.9304190278053284	-0.10432904	Yes
row_144	PFKFB3	null	null	4006	0.9296799898147583	-0.101318896	Yes
row_145	SLC1A1	null	null	4011	0.92746901512146	-0.098609865	Yes
row_146	IFIH1	null	null	4045	0.9180200099945068	-0.100266986	Yes
row_147	GDF10	null	null	4056	0.9165840148925781	-0.0984613	Yes
row_148	MOXD1	null	null	4059	0.9158679842948914	-0.095451154	Yes
row_149	PTGER4	null	null	4088	0.9059649705886841	-0.0963555	Yes
row_150	ZBTB10	null	null	4093	0.9045689702033997	-0.09364647	Yes
row_151	CFI	null	null	4106	0.900406002998352	-0.09214189	Yes
row_152	SORBS1	null	null	4111	0.8990269899368286	-0.089432865	Yes
row_153	SLC31A1	null	null	4119	0.896282970905304	-0.0871755	Yes
row_154	SCG5	null	null	4120	0.896282970905304	-0.08386424	Yes
row_155	MAN1C1	null	null	4127	0.8949170112609863	-0.081456326	Yes
row_156	CDH2	null	null	4128	0.8949170112609863	-0.07814507	Yes
row_157	RGS5	null	null	4165	0.8868119716644287	-0.08025387	Yes
row_158	RPS6KA5	null	null	4199	0.8788549900054932	-0.08191099	Yes
row_159	ABCC4	null	null	4272	0.8633660078048706	-0.08943984	Yes
row_160	KIAA1199	null	null	4282	0.8614680171012878	-0.0874836	Yes
row_161	SEC14L1	null	null	4319	0.8521019816398621	-0.08959239	Yes
row_162	SPTBN1	null	null	4350	0.8441439867019653	-0.09079784	Yes
row_163	C8ORF4	null	null	4353	0.8435379862785339	-0.0877877	Yes
row_164	PIK3C2B	null	null	4354	0.8435379862785339	-0.08447644	Yes
row_165	MYO10	null	null	4409	0.8309999704360962	-0.08929527	Yes
row_166	THBS1	null	null	4423	0.8286529779434204	-0.08794125	Yes
row_167	KLF11	null	null	4448	0.8251550197601318	-0.08824336	Yes
row_168	HLA-DPA1	null	null	4469	0.8216860294342041	-0.08794324	Yes
row_169	NPY1R	null	null	4511	0.8108770251274109	-0.09080482	Yes
row_170	P2RY5	null	null	4513	0.8097550272941589	-0.08764412	Yes
row_171	ANGPTL2	null	null	4526	0.8047410249710083	-0.08613955	Yes
row_172	ARHGAP6	null	null	4557	0.7959669828414917	-0.087345004	Yes
row_173	FRMD4B	null	null	4559	0.7959669828414917	-0.084184304	Yes
row_174	PRELP	null	null	4560	0.7959669828414917	-0.08087304	Yes
row_175	MAFB	null	null	4572	0.792182981967926	-0.07921791	Yes
row_176	ADRB2	null	null	4616	0.7836570143699646	-0.08238061	Yes
row_177	EIF2S2	null	null	4630	0.7810270190238953	-0.08102659	Yes
row_178	NRN1	null	null	4659	0.7727140188217163	-0.08193093	Yes
row_179	NFKBIA	null	null	4660	0.7721999883651733	-0.078619674	Yes
row_180	HLA-DQA1	null	null	4674	0.7691270112991333	-0.07726566	Yes
row_181	APOLD1	null	null	4683	0.7660760283470154	-0.07515885	Yes
row_182	CXCL14	null	null	4702	0.7595379948616028	-0.074557625	Yes
row_183	NOVA1	null	null	4707	0.7590389847755432	-0.07184859	Yes
row_184	OLFML2A	null	null	4710	0.7585399746894836	-0.06883845	Yes
row_185	PAPPA	null	null	4722	0.7555620074272156	-0.067183316	Yes
row_186	ATP8B4	null	null	4840	0.7268540263175964	-0.08148723	Yes
row_187	GLIPR1	null	null	4873	0.7181450128555298	-0.0829938	Yes
row_188	BHLHB2	null	null	4885	0.7145299911499023	-0.081338674	Yes
row_189	BTG2	null	null	4908	0.70694500207901	-0.081339665	Yes
row_190	KIAA1609	null	null	4911	0.7065029740333557	-0.078329526	Yes
row_191	TXNIP	null	null	4948	0.69862300157547	-0.080438316	Yes
row_192	CDK7	null	null	4949	0.6981890201568604	-0.07712706	Yes
row_193	ACLY	null	null	4954	0.6960269808769226	-0.07441803	Yes
row_194	PDLIM5	null	null	4963	0.6947349905967712	-0.07231123	Yes
row_195	POPDC3	null	null	4968	0.6947349905967712	-0.0696022	Yes
row_196	SRPX	null	null	4976	0.6934469938278198	-0.06734484	Yes
row_197	RAI2	null	null	4979	0.6925910115242004	-0.0643347	Yes
row_198	PER3	null	null	4981	0.6921629905700684	-0.061173994	Yes
row_199	ME1	null	null	4983	0.6917359828948975	-0.058013294	Yes
row_200	STX11	null	null	5003	0.687063992023468	-0.05756262	Yes
row_201	GLS	null	null	5035	0.6795250177383423	-0.05891863	Yes
row_202	C7	null	null	5071	0.6696730256080627	-0.06087687	Yes
row_203	CTSS	null	null	5074	0.6684569716453552	-0.057866722	Yes
row_204	CLK1	null	null	5119	0.6560879945755005	-0.061179977	Yes
row_205	CDO1	null	null	5154	0.6486769914627075	-0.062987655	Yes
row_206	SPARCL1	null	null	5158	0.6463630199432373	-0.06012807	Yes
row_207	PER2	null	null	5184	0.6417710185050964	-0.060580738	Yes
row_208	ALDH1A2	null	null	5188	0.6406310200691223	-0.057721153	Yes
row_209	DOK5	null	null	5190	0.6398720145225525	-0.05456045	Yes
row_210	CCL8	null	null	5196	0.6391149759292603	-0.05200198	Yes
row_211	SRD5A1	null	null	5205	0.6372280120849609	-0.049895175	Yes
row_212	C3ORF64	null	null	5241	0.6297590136528015	-0.051853415	Yes
row_213	IFI44L	null	null	5259	0.6260719895362854	-0.051101625	Yes
row_214	PPP4R2	null	null	5313	0.6144809722900391	-0.05576989	Yes
row_215	HAPLN1	null	null	5346	0.6066870093345642	-0.057276458	Yes
row_216	TP53BP2	null	null	5358	0.6049349904060364	-0.05562133	Yes
row_217	CHL1	null	null	5362	0.6028419733047485	-0.05276174	Yes
row_218	TMEM70	null	null	5364	0.6024940013885498	-0.04960104	Yes
row_219	SERPINE2	null	null	5377	0.6000670194625854	-0.048096467	Yes
row_220	IL8	null	null	5390	0.5973100066184998	-0.046591893	Yes
row_221	IL15	null	null	5397	0.5962799787521362	-0.044183977	Yes
row_222	RABGAP1	null	null	5412	0.5928660035133362	-0.04298052	Yes
row_223	MAN1A1	null	null	5415	0.5925260186195374	-0.039970372	Yes
row_224	GIPC2	null	null	5419	0.5908300280570984	-0.037110787	Yes
row_225	EVI1	null	null	5425	0.5888040065765381	-0.034552313	Yes
row_226	ACSL5	null	null	5427	0.5881310105323792	-0.031391613	Yes
row_227	TCF4	null	null	5434	0.5874580144882202	-0.028983695	Yes
row_228	KLF4	null	null	5447	0.5847799777984619	-0.027479121	Yes
row_229	SLC5A3	null	null	5455	0.5831140279769897	-0.025221763	Yes
row_230	ITIH5	null	null	5484	0.5755320191383362	-0.026126102	Yes
row_231	TM4SF1	null	null	5514	0.5700119733810425	-0.027181	Yes
row_232	BCAR3	null	null	5523	0.567438006401062	-0.025074197	Yes
row_233	TRIB1	null	null	5543	0.5642420053482056	-0.024623523	Yes
row_234	KL	null	null	5554	0.5607540011405945	-0.022817835	Yes
row_235	SCHIP1	null	null	5572	0.5560420155525208	-0.022066047	Yes
row_236	SOX17	null	null	5577	0.5554180145263672	-0.019357016	Yes
row_237	COLEC12	null	null	5584	0.5538600087165833	-0.0169491	Yes
row_238	FRZB	null	null	5585	0.5535500049591064	-0.013637843	Yes
row_239	KCNAB1	null	null	5597	0.5501459836959839	-0.011982712	Yes
row_240	COL14A1	null	null	5615	0.5455470085144043	-0.011230923	Yes
row_241	PLXDC1	null	null	5628	0.5419020056724548	-0.009726349	Yes
row_242	SOCS2	null	null	5629	0.5415999889373779	-0.0064150915	Yes
row_243	DKK2	null	null	5634	0.5409960150718689	-0.0037060613	Yes
row_244	KIAA0355	null	null	5641	0.5394899845123291	-0.0012981454	Yes
row_245	SH2B3	null	null	5694	0.5255789756774902	-0.005815854	Yes
row_246	EIF5	null	null	5698	0.5249969959259033	-0.002956267	Yes
row_247	CNOT2	null	null	5713	0.5218089818954468	-0.0017528073	Yes
row_248	PGK1	null	null	5716	0.5215200185775757	0.0012573368	Yes
row_249	ALCAM	null	null	5775	0.507606029510498	-0.004163714	Yes
row_250	BCHE	null	null	5790	0.505653977394104	-0.0029602544	Yes
row_251	CD302	null	null	5792	0.5050979852676392	2.0044667E-4	Yes
row_252	COL15A1	null	null	5814	0.5012249946594238	3.500068E-4	Yes
row_253	TEK	null	null	5836	0.4965690076351166	4.995669E-4	Yes
row_254	DOCK9	null	null	5840	0.4962959885597229	0.003359154	Yes
row_255	CHD7	null	null	5878	0.48607099056243896	0.0010998013	Yes
row_256	HHEX	null	null	5900	0.47999700903892517	0.0012493614	Yes
row_257	MAP3K8	null	null	5903	0.47973400354385376	0.004259506	Yes
row_258	SPRY1	null	null	5917	0.4776430130004883	0.005613522	Yes
row_259	PTGER2	null	null	5961	0.4675869941711426	0.002450827	Yes
row_260	TXNRD1	null	null	5971	0.46403399109840393	0.004407072	Yes
row_261	EFNB2	null	null	5975	0.46176499128341675	0.007266659	Yes
row_262	PPP1R3C	null	null	5976	0.46176499128341675	0.010577917	Yes
row_263	RAI14	null	null	5984	0.46000799536705017	0.012835276	Yes
row_264	TOP2A	null	null	6015	0.4535439908504486	0.011629823	Yes
row_265	CEP55	null	null	6044	0.4479059875011444	0.010725483	Yes
row_266	MTUS1	null	null	6079	0.43970200419425964	0.008917802	Yes
row_267	OMD	null	null	6255	0.3909189999103546	-0.014118425	Yes
row_268	ANK2	null	null	6278	0.384768009185791	-0.014119421	Yes
row_269	TPD52	null	null	6291	0.3809939920902252	-0.012614847	Yes
row_270	MGP	null	null	6308	0.3766309916973114	-0.011712502	Yes
row_271	ERG	null	null	6312	0.37580499053001404	-0.008852915	Yes
row_272	GEM	null	null	6314	0.37539198994636536	-0.005692214	Yes
row_273	LMO3	null	null	6340	0.36986199021339417	-0.0061448817	Yes
row_274	MYRIP	null	null	6351	0.36661800742149353	-0.0043391944	Yes
row_275	MCFD2	null	null	6371	0.36219701170921326	-0.00388852	Yes
row_276	LPL	null	null	6389	0.35624000430107117	-0.0031367317	Yes
row_277	TFPI2	null	null	6416	0.34822800755500793	-0.0037399568	Yes
row_278	STC1	null	null	6429	0.3439890146255493	-0.002235383	Yes
row_279	TSPAN13	null	null	6434	0.34264901280403137	4.7364694E-4	Yes
row_280	JAM2	null	null	6455	0.3358210027217865	7.737641E-4	Yes
row_281	ACTC1	null	null	6463	0.33413100242614746	0.003031123	Yes
row_282	RRM2	null	null	6468	0.33132800459861755	0.005740153	Yes
row_283	PCDH17	null	null	6497	0.3232100009918213	0.004835814	Yes
row_284	CDC42EP3	null	null	6500	0.32229700684547424	0.007845958	Yes
row_285	PRG4	null	null	6509	0.31975099444389343	0.009952759	Yes
row_286	ADAMTSL3	null	null	6546	0.30918198823928833	0.007843964	Yes
row_287	SSPN	null	null	6577	0.3004229962825775	0.0066385106	Yes
row_288	NLK	null	null	6584	0.29903700947761536	0.009046427	Yes
row_289	ECM2	null	null	6585	0.29748401045799255	0.012357685	Yes
row_290	KLHL2	null	null	6593	0.29354000091552734	0.014615044	Yes
row_291	CD44	null	null	6604	0.2909870147705078	0.016420731	Yes
row_292	ELOVL5	null	null	6623	0.2847520112991333	0.017021963	Yes
row_293	ENPP4	null	null	6693	0.2624169886112213	0.009944784	Yes
row_294	TSPAN12	null	null	6708	0.2557939887046814	0.011148244	Yes
row_295	ADH1B	null	null	6753	0.23411999642848969	0.007834991	Yes
row_296	PMAIP1	null	null	6763	0.23130099475383759	0.009791236	Yes
row_297	ABI3BP	null	null	6780	0.22324000298976898	0.010693582	Yes
row_298	LRP1B	null	null	6821	0.20811599493026733	0.007982559	Yes
row_299	OGN	null	null	6835	0.20323500037193298	0.009336575	Yes
row_300	PPP1R12B	null	null	6859	0.177265003323555	0.009185021	Yes
row_301	STEAP4	null	null	6870	0.16834500432014465	0.010990708	Yes
