# Supplementary material for: Signatures of RNA binding proteins globally coupled to effective microRNA target sites
Source: HighWire-hosted journal article supplement (doi:10.1101/gr.103259.109), 2010-05-27
Supplement: Table_S13.zip [file BRCA1_OVEREXP_DN.xls]

NAME	PROBE	GENE SYMBOL	GENE_TITLE	RANK IN GENE LIST	RANK METRIC SCORE	RUNNING ES	CORE ENRICHMENT
row_0	SOX4	null	null	53	3.699057102203369	0.023582175	Yes
row_1	PRKACA	null	null	193	3.699057102203369	0.034722224	Yes
row_2	PKN1	null	null	400	3.096997022628784	0.03616898	Yes
row_3	CCND1	null	null	440	3.000087022781372	0.06177662	Yes
row_4	SLC7A5	null	null	468	3.000087022781372	0.08912037	Yes
row_5	HCFC1	null	null	533	2.853959083557129	0.11111111	Yes
row_6	NDRG1	null	null	1029	2.221935987472534	0.070746526	Yes
row_7	SON	null	null	1168	2.096997022628784	0.08203125	Yes
row_8	SCRIB	null	null	1209	2.0655879974365234	0.10749421	Yes
row_9	SCAP	null	null	1559	1.8182430267333984	0.08825231	Yes
row_10	SLC29A1	null	null	1602	1.7905720472335815	0.113425925	Yes
row_11	RABEPK	null	null	1728	1.7259290218353271	0.12659143	Yes
row_12	PDCD11	null	null	1737	1.7259290218353271	0.15668403	Yes
row_13	RPIA	null	null	2192	1.5031570196151733	0.12225115	Yes
row_14	CCNE1	null	null	2366	1.431885004043579	0.12847222	Yes
row_15	ATIC	null	null	2464	1.3937050104141235	0.14568865	Yes
row_16	ANXA11	null	null	2475	1.3915610313415527	0.1754919	Yes
row_17	PPM1F	null	null	2481	1.3873029947280884	0.20601852	Yes
row_18	LMNB2	null	null	2822	1.2628940343856812	0.1880787	Yes
row_19	RXRA	null	null	2838	1.2597240209579468	0.21715856	Yes
row_20	FGFR3	null	null	3113	1.1766129732131958	0.20876735	Yes
row_21	U2AF1	null	null	3240	1.1427539587020874	0.2217882	Yes
row_22	BRD2	null	null	3374	1.1057709455490112	0.2337963	Yes
row_23	GTF3C2	null	null	3470	1.075808048248291	0.2513021	Yes
row_24	SLC1A3	null	null	3606	1.035356044769287	0.26302084	Yes
row_25	CTPS	null	null	3703	1.0088609457015991	0.28038195	Yes
row_26	SF3A3	null	null	3749	0.995764970779419	0.3051215	Yes
row_27	JARID1C	null	null	4020	0.926002025604248	0.297309	Yes
row_28	NMT1	null	null	4095	0.90317702293396	0.317853	Yes
row_29	SFRS11	null	null	4301	0.8570719957351685	0.31944445	Yes
row_30	VDAC1	null	null	5084	0.6652309894561768	0.23755786	No
row_31	PPAT	null	null	5430	0.5877940058708191	0.21889468	No
