# Supplementary material for: Signatures of RNA binding proteins globally coupled to effective microRNA target sites
Source: HighWire-hosted journal article supplement (doi:10.1101/gr.103259.109), 2010-05-27
Supplement: Table_S13.zip [file BRCA_BRCA1_POS.xls]

NAME	PROBE	GENE SYMBOL	GENE_TITLE	RANK IN GENE LIST	RANK METRIC SCORE	RUNNING ES	CORE ENRICHMENT
row_0	SSR1	null	null	91	3.699057102203369	0.011819236	Yes
row_1	PHF20L1	null	null	136	3.699057102203369	0.03044612	Yes
row_2	SERBP1	null	null	145	3.699057102203369	0.05428737	Yes
row_3	PDXK	null	null	303	3.398026943206787	0.05654693	Yes
row_4	CEP57	null	null	414	3.096997022628784	0.06561414	Yes
row_5	PPP1CB	null	null	480	2.9209060668945312	0.08119931	Yes
row_6	XRN1	null	null	693	2.619875907897949	0.07549247	Yes
row_7	GLRX2	null	null	725	2.552928924560547	0.096002325	Yes
row_8	KIAA0020	null	null	832	2.44378399848938	0.105648905	Yes
row_9	VPREB3	null	null	864	2.398026943206787	0.12615876	Yes
row_10	ODF2L	null	null	933	2.3188459873199463	0.1413094	Yes
row_11	RTCD1	null	null	1179	2.086272954940796	0.13082272	Yes
row_12	PSME4	null	null	1234	2.045844078063965	0.14800116	Yes
row_13	MPZL1	null	null	1304	1.9914870262145996	0.16300696	Yes
row_14	FAM46C	null	null	1320	1.9747810363769531	0.1858343	Yes
row_15	MTMR2	null	null	1340	1.9666630029678345	0.20808229	Yes
row_16	ZNF644	null	null	1620	1.785243034362793	0.19267093	Yes
row_17	LRRC8D	null	null	1669	1.764557957649231	0.21071844	Yes
row_18	YBX1	null	null	1679	1.7595380544662476	0.23441485	Yes
row_19	ZNF267	null	null	1764	1.7167860269546509	0.24724798	Yes
row_20	MTF2	null	null	2009	1.5851140022277832	0.23690616	Yes
row_21	ANK3	null	null	2232	1.486868977546692	0.22975089	Yes
row_22	WDR43	null	null	2286	1.4610110521316528	0.24707417	Yes
row_23	C1ORF38	null	null	2619	1.3354450464248657	0.22398612	Yes
row_24	SLC5A6	null	null	2759	1.2840839624404907	0.22885285	Yes
row_25	IRF5	null	null	2804	1.2709219455718994	0.24747974	Yes
row_26	MYC	null	null	2825	1.2628940343856812	0.26958287	Yes
row_27	REXO2	null	null	3480	1.0727159976959229	0.19985518	No
row_28	COL4A1	null	null	3766	0.9906359910964966	0.18357477	No
row_29	TCF7	null	null	3809	0.9797260165214539	0.20249133	No
row_30	POU2AF1	null	null	3998	0.9311590194702148	0.20026074	No
row_31	SLC11A2	null	null	4149	0.8888239860534668	0.20353422	No
row_32	CNGA1	null	null	4802	0.7385860085487366	0.1340962	No
row_33	CYBB	null	null	4831	0.7305740118026733	0.15504059	No
row_34	FBXL10	null	null	5320	0.613053023815155	0.109356925	No
row_35	TRNT1	null	null	6127	0.42907699942588806	0.017613014	No
row_36	DDX58	null	null	6237	0.39694198966026306	0.026825067	No
row_37	UCHL5	null	null	6276	0.384768009185791	0.046321012	No
row_38	LAMP3	null	null	6281	0.38392698764801025	0.07074164	No
row_39	MS4A1	null	null	6748	0.23635900020599365	0.028244536	No
