# Supplementary material for: Signatures of RNA binding proteins globally coupled to effective microRNA target sites
Source: HighWire-hosted journal article supplement (doi:10.1101/gr.103259.109), 2010-05-27
Supplement: Table_S13.zip [file BRENTANI_TRANSCRIPTION_FACTORS.xls]

NAME	PROBE	GENE SYMBOL	GENE_TITLE	RANK IN GENE LIST	RANK METRIC SCORE	RUNNING ES	CORE ENRICHMENT
row_0	PPARA	null	null	129	3.699057102203369	0.012586805	Yes
row_1	CBFB	null	null	197	3.699057102203369	0.03414352	Yes
row_2	ETS1	null	null	361	3.221935987472534	0.041811343	Yes
row_3	FOSL2	null	null	365	3.221935987472534	0.07262731	Yes
row_4	EGR3	null	null	373	3.221935987472534	0.102864586	Yes
row_5	PBX2	null	null	431	3.096997022628784	0.12586805	Yes
row_6	TCF7L2	null	null	538	2.853959083557129	0.1417824	Yes
row_7	MYB	null	null	644	2.699057102203369	0.15784143	Yes
row_8	SRF	null	null	656	2.6576640605926514	0.1875	Yes
row_9	MYBL1	null	null	659	2.6576640605926514	0.21846065	Yes
row_10	MAF	null	null	764	2.522965908050537	0.23466435	Yes
row_11	ATF1	null	null	978	2.267693042755127	0.23509838	Yes
row_12	GLI3	null	null	1229	2.0556039810180664	0.2301794	Yes
row_13	ETV6	null	null	1788	1.703421950340271	0.18070023	Yes
row_14	IRF4	null	null	1803	1.6904569864273071	0.20992477	Yes
row_15	STAT3	null	null	1897	1.642151951789856	0.2277199	Yes
row_16	MYCN	null	null	2018	1.581786036491394	0.2416088	Yes
row_17	STAT5B	null	null	2027	1.578482985496521	0.2717014	Yes
row_18	LITAF	null	null	2140	1.5287950038909912	0.2867477	Yes
row_19	MYC	null	null	2825	1.2628940343856812	0.21903935	No
row_20	RXRA	null	null	2838	1.2597240209579468	0.24855323	No
row_21	REL	null	null	3174	1.1599810123443604	0.2313368	No
row_22	FLI1	null	null	3524	1.06256902217865	0.2120949	No
row_23	CBFA2T3	null	null	3641	1.026036024093628	0.2265625	No
row_24	PML	null	null	3860	0.9674680233001709	0.22627315	No
row_25	MAFG	null	null	4285	0.8602079749107361	0.19618055	No
row_26	FOXF1	null	null	4672	0.7691270112991333	0.17158565	No
row_27	ETV3	null	null	5369	0.6014530062675476	0.1021412	No
row_28	WT1	null	null	5444	0.5851140022277832	0.12268518	No
row_29	BCL6	null	null	5532	0.565837025642395	0.14134838	No
row_30	ETV1	null	null	6252	0.3924170136451721	0.06857638	No
row_31	EHF	null	null	6535	0.31237998604774475	0.059027772	No
