# Supplementary material for: Signatures of RNA binding proteins globally coupled to effective microRNA target sites
Source: HighWire-hosted journal article supplement (doi:10.1101/gr.103259.109), 2010-05-27
Supplement: Table_S13.zip [file CARBOHYDRATE_BINDING.xls]

NAME	PROBE	GENE SYMBOL	GENE_TITLE	RANK IN GENE LIST	RANK METRIC SCORE	RUNNING ES	CORE ENRICHMENT
row_0	TGFBR3	null	null	1126	2.130855083465576	-0.1270966	No
row_1	GCK	null	null	1385	1.9282050132751465	-0.1286871	No
row_2	AAMP	null	null	1617	1.785243034362793	-0.12637363	No
row_3	VEGFA	null	null	2381	1.4272149801254272	-0.20098323	No
row_4	PF4	null	null	3294	1.1273479461669922	-0.29713708	Yes
row_5	HDGF	null	null	3371	1.1057709455490112	-0.2724118	Yes
row_6	TNFAIP6	null	null	3692	1.0115280151367188	-0.28296703	Yes
row_7	CLEC10A	null	null	3743	0.9966260194778442	-0.25448236	Yes
row_8	LMAN1	null	null	3904	0.9563320279121399	-0.24190283	Yes
row_9	SIGLEC8	null	null	3999	0.9311590194702148	-0.21978022	Yes
row_10	THBS2	null	null	4246	0.8684679865837097	-0.21963562	Yes
row_11	KLRA1	null	null	4459	0.8228390216827393	-0.2145749	Yes
row_12	POLA1	null	null	4650	0.7763310074806213	-0.20633313	Yes
row_13	KLRB1	null	null	4673	0.7691270112991333	-0.17379987	Yes
row_14	COL13A1	null	null	4717	0.757049024105072	-0.14430305	Yes
row_15	VCAN	null	null	4825	0.7319769859313965	-0.12406014	Yes
row_16	CD209	null	null	4902	0.7082740068435669	-0.099334866	Yes
row_17	IMPG2	null	null	4969	0.6943060159683228	-0.073163666	Yes
row_18	ODZ1	null	null	5229	0.6319860219955444	-0.07489877	Yes
row_19	LGALS8	null	null	5264	0.6246060132980347	-0.044100624	Yes
row_20	CLEC4E	null	null	5387	0.5986859798431396	-0.026026592	Yes
row_21	MRC1	null	null	5677	0.5299699902534485	-0.032099463	Yes
row_22	KLRG1	null	null	5818	0.5004000067710876	-0.016628094	Yes
row_23	FSTL1	null	null	6096	0.43731799721717834	-0.02096586	Yes
row_24	CLEC7A	null	null	6177	0.41485199332237244	0.003181047	Yes
row_25	ZNF146	null	null	6236	0.39737600088119507	0.030508984	Yes
row_26	CLEC3A	null	null	6347	0.3674269914627075	0.050318122	Yes
row_27	LPL	null	null	6389	0.35624000430107117	0.08010413	Yes
