# Supplementary material for: Signatures of RNA binding proteins globally coupled to effective microRNA target sites
Source: HighWire-hosted journal article supplement (doi:10.1101/gr.103259.109), 2010-05-27
Supplement: Table_S13.zip [file CATION_BINDING.xls]

NAME	PROBE	GENE SYMBOL	GENE_TITLE	RANK IN GENE LIST	RANK METRIC SCORE	RUNNING ES	CORE ENRICHMENT
row_0	CAMKK2	null	null	20	3.699057102203369	0.010421702	No
row_1	FBLN2	null	null	382	3.096997022628784	-0.02879992	No
row_2	LIMD1	null	null	492	2.9209060668945312	-0.03133498	No
row_3	SPOCK2	null	null	876	2.376837968826294	-0.0737594	No
row_4	CANX	null	null	924	2.3373289108276367	-0.0672684	No
row_5	BIRC5	null	null	1037	2.2076950073242188	-0.07024021	No
row_6	THBD	null	null	1121	2.142754077911377	-0.06899014	No
row_7	MSRB2	null	null	1271	2.0178160667419434	-0.07734846	No
row_8	KCNIP3	null	null	1656	1.769637942314148	-0.119918466	No
row_9	MYNN	null	null	1760	1.7167860269546509	-0.121580034	No
row_10	REPS2	null	null	1826	1.6820240020751953	-0.1177095	No
row_11	SIAH1	null	null	1881	1.6537339687347412	-0.11223758	No
row_12	CALR	null	null	1925	1.627174973487854	-0.10516425	No
row_13	FECH	null	null	2223	1.489542007446289	-0.13506866	No
row_14	NUCB2	null	null	2327	1.4462039470672607	-0.13673022	No
row_15	SLC25A13	null	null	2350	1.4366060495376587	-0.12659968	No
row_16	CALM3	null	null	2467	1.3937050104141235	-0.13015382	No
row_17	ABL1	null	null	2521	1.3727209568023682	-0.124536306	No
row_18	FBN1	null	null	2955	1.2219359874725342	-0.1742398	No
row_19	GPD2	null	null	2982	1.2161829471588135	-0.1646916	No
row_20	STIM1	null	null	3165	1.1624979972839355	-0.1778541	No
row_21	DYRK2	null	null	3297	1.1273479461669922	-0.18359196	Yes
row_22	MMP16	null	null	3304	1.125025987625122	-0.17113212	Yes
row_23	TRPS1	null	null	3324	1.1192729473114014	-0.16056484	Yes
row_24	FREQ	null	null	3363	1.1068799495697021	-0.1527636	Yes
row_25	TCHH	null	null	3439	1.086272954940796	-0.15034889	Yes
row_26	SLU7	null	null	3573	1.0477789640426636	-0.15637791	Yes
row_27	RGN	null	null	3799	0.9822189807891846	-0.17580043	Yes
row_28	LTA4H	null	null	3846	0.9698920249938965	-0.16916385	Yes
row_29	RNF11	null	null	3928	0.9477779865264893	-0.16762263	Yes
row_30	PPM2C	null	null	4009	0.9282050132751465	-0.16593581	Yes
row_31	MEX3B	null	null	4055	0.9165840148925781	-0.15915366	Yes
row_32	MAN1C1	null	null	4127	0.8949170112609863	-0.15615661	Yes
row_33	MMP13	null	null	4135	0.8921989798545837	-0.14384235	Yes
row_34	MDM2	null	null	4206	0.8775429725646973	-0.14069973	Yes
row_35	ZFPM2	null	null	4340	0.8477990031242371	-0.14672875	Yes
row_36	MNAT1	null	null	4356	0.8429319858551025	-0.13557914	Yes
row_37	TYR	null	null	4379	0.8381199836730957	-0.1254486	Yes
row_38	ATP7B	null	null	4397	0.8345460295677185	-0.11459016	Yes
row_39	RNF4	null	null	4458	0.8228390216827393	-0.10999172	Yes
row_40	ANXA1	null	null	4462	0.8228390216827393	-0.09709513	Yes
row_41	LNPEP	null	null	4498	0.8148279786109924	-0.08885715	Yes
row_42	GCA	null	null	4503	0.8120020031929016	-0.076106146	Yes
row_43	CBLB	null	null	4597	0.7884320020675659	-0.0763119	Yes
row_44	TIMM9	null	null	4618	0.7836570143699646	-0.0658902	Yes
row_45	ATP7A	null	null	4786	0.7419289946556091	-0.07686899	Yes
row_46	BRCA1	null	null	4870	0.7185990214347839	-0.07561893	Yes
row_47	ME1	null	null	4983	0.6917359828948975	-0.078590736	Yes
row_48	FDX1	null	null	4996	0.6879090070724487	-0.06700438	Yes
row_49	ASPH	null	null	4999	0.6874859929084778	-0.053962212	Yes
row_50	PRDM4	null	null	5022	0.682440996170044	-0.043831673	Yes
row_51	ABL2	null	null	5075	0.6680529713630676	-0.03806858	Yes
row_52	PKD2	null	null	5138	0.6521720290184021	-0.033761308	Yes
row_53	CA12	null	null	5165	0.6455940008163452	-0.024213094	Yes
row_54	ZNF185	null	null	5173	0.6436790227890015	-0.011898831	Yes
row_55	ZEB1	null	null	5200	0.638359010219574	-0.0023506193	Yes
row_56	MAN1A1	null	null	5415	0.5925260186195374	-0.020171747	Yes
row_57	CTCF	null	null	5463	0.5814539790153503	-0.013680748	Yes
row_58	MCTP2	null	null	5721	0.5203679800033569	-0.037761886	Yes
row_59	RABIF	null	null	5759	0.5121009945869446	-0.02981507	Yes
row_60	PEX12	null	null	5898	0.4802590012550354	-0.036571994	Yes
row_61	PPP3CB	null	null	5922	0.47633999586105347	-0.02658704	Yes
row_62	CA2	null	null	6012	0.45403799414634705	-0.026210466	Yes
row_63	YY1	null	null	6161	0.41961801052093506	-0.03442321	Yes
row_64	ZNF146	null	null	6236	0.39737600088119507	-0.031862915	Yes
row_65	TPD52	null	null	6291	0.3809939920902252	-0.026390987	Yes
row_66	GDA	null	null	6395	0.35407501459121704	-0.028052557	Yes
row_67	RCN2	null	null	6423	0.34571799635887146	-0.018649926	Yes
row_68	MSRB3	null	null	6508	0.31975099444389343	-0.017545447	Yes
row_69	BNIP2	null	null	6590	0.29490798711776733	-0.016004222	Yes
row_70	CALB1	null	null	6740	0.24208399653434753	-0.024362545	Yes
row_71	ADH1B	null	null	6753	0.23411999642848969	-0.012776191	Yes
row_72	RASGRP1	null	null	6865	0.1736229956150055	-0.0156024145	Yes
row_73	EEA1	null	null	6926	0.113257996737957	-0.011003977	Yes
row_74	GPR98	null	null	6940	0.07251100242137909	4.3679602E-4	Yes
