# Supplementary material for: Signatures of RNA binding proteins globally coupled to effective microRNA target sites
Source: HighWire-hosted journal article supplement (doi:10.1101/gr.103259.109), 2010-05-27
Supplement: Table_S13.zip [file CELL_PROJECTION.xls]

NAME	PROBE	GENE SYMBOL	GENE_TITLE	RANK IN GENE LIST	RANK METRIC SCORE	RUNNING ES	CORE ENRICHMENT
row_0	FGD6	null	null	125	3.699057102203369	0.0027068844	Yes
row_1	B4GALT1	null	null	263	3.398026943206787	0.0036736298	Yes
row_2	CACNA1A	null	null	312	3.398026943206787	0.017546408	Yes
row_3	CCDC88A	null	null	509	2.9209060668945312	0.009957468	Yes
row_4	PRSS7	null	null	603	2.744813919067383	0.017304724	Yes
row_5	CDK6	null	null	665	2.6576640605926514	0.02929235	Yes
row_6	BCAR1	null	null	956	2.301116943359375	0.008072321	Yes
row_7	S100A11	null	null	1004	2.251899003982544	0.02209011	Yes
row_8	CROCC	null	null	1404	1.9209059476852417	-0.014936183	Yes
row_9	EFHC1	null	null	1589	1.7959669828414917	-0.020784982	Yes
row_10	AMOT	null	null	1619	1.785243034362793	-0.0041569844	Yes
row_11	CD2AP	null	null	1685	1.754573941230774	0.007250596	Yes
row_12	CDH23	null	null	1709	1.7448140382766724	0.024748662	Yes
row_13	SCYL3	null	null	1715	1.7400150299072266	0.04485694	Yes
row_14	CLIC4	null	null	1922	1.627174973487854	0.035817884	Yes
row_15	NEFL	null	null	1942	1.6162710189819336	0.053896	Yes
row_16	MYO5A	null	null	1946	1.6162710189819336	0.0742943	Yes
row_17	PCDH15	null	null	2010	1.5851140022277832	0.0859919	Yes
row_18	CLIC5	null	null	2034	1.5752049684524536	0.103489965	Yes
row_19	PDPN	null	null	2166	1.517212986946106	0.10532678	Yes
row_20	MYO6	null	null	2209	1.4949369430541992	0.12006963	Yes
row_21	MYO1C	null	null	2228	1.486868977546692	0.13829276	Yes
row_22	FGD1	null	null	2263	1.468608021736145	0.1541957	Yes
row_23	MYO7A	null	null	2309	1.453544020652771	0.16850351	Yes
row_24	NRSN1	null	null	2418	1.4134999513626099	0.17367558	Yes
row_25	ABI1	null	null	2441	1.4045909643173218	0.19131866	Yes
row_26	ROPN1B	null	null	2455	1.4002039432525635	0.21026684	Yes
row_27	ALS2	null	null	2478	1.3894269466400146	0.22790992	Yes
row_28	RAB35	null	null	2552	1.3625969886779785	0.23815742	Yes
row_29	MYH9	null	null	2835	1.2597240209579468	0.21809748	No
row_30	ATP6V0A4	null	null	2869	1.2488080263137817	0.23414543	No
row_31	CTTN	null	null	3067	1.1912009716033936	0.22641148	No
row_32	APBB2	null	null	3660	1.0214500427246094	0.16139795	No
row_33	ITGB1	null	null	3787	0.9847270250320435	0.16395982	No
row_34	ARF6	null	null	4049	0.9173009991645813	0.14694513	No
row_35	EZR	null	null	4563	0.7948819994926453	0.093387514	No
row_36	NF1	null	null	4567	0.7943410277366638	0.11378582	No
row_37	ITGB1BP1	null	null	4836	0.7287099957466125	0.09575604	No
row_38	MYO3A	null	null	5094	0.6624280214309692	0.07932139	No
row_39	PKD2	null	null	5138	0.6521720290184021	0.09391923	No
row_40	DNALI1	null	null	5357	0.6049349904060364	0.08314004	No
row_41	SPAG6	null	null	5525	0.5671179890632629	0.07975643	No
row_42	CDH13	null	null	5593	0.5526189804077148	0.090873994	No
row_43	CDC42	null	null	5767	0.5095670223236084	0.086620316	No
row_44	DOCK4	null	null	5868	0.4903469979763031	0.09295249	No
row_45	ACTN2	null	null	5881	0.48500800132751465	0.11204569	No
row_46	SI	null	null	6216	0.405472993850708	0.08444515	No
row_47	RPGRIP1L	null	null	6790	0.22034600377082825	0.022186838	No
