# Supplementary material for: Signatures of RNA binding proteins globally coupled to effective microRNA target sites
Source: HighWire-hosted journal article supplement (doi:10.1101/gr.103259.109), 2010-05-27
Supplement: Table_S13.zip [file CHEN_HOXA5_TARGETS_UP.xls]

NAME	PROBE	GENE SYMBOL	GENE_TITLE	RANK IN GENE LIST	RANK METRIC SCORE	RUNNING ES	CORE ENRICHMENT
row_0	BCL10	null	null	3	3.699057102203369	0.008181322	No
row_1	CREB5	null	null	47	3.699057102203369	0.010504413	No
row_2	FOSL2	null	null	365	3.221935987472534	-0.027301377	No
row_3	RIC8B	null	null	443	3.000087022781372	-0.02995778	No
row_4	PTGS2	null	null	491	2.9209060668945312	-0.028220512	No
row_5	SFPQ	null	null	530	2.853959083557129	-0.025165142	No
row_6	SNAI2	null	null	598	2.744813919067383	-0.02635699	No
row_7	DLX2	null	null	628	2.699057102203369	-0.021983517	No
row_8	KIF18A	null	null	688	2.619875907897949	-0.022003718	No
row_9	ZNF44	null	null	784	2.494936943054199	-0.027296327	No
row_10	RYBP	null	null	789	2.494936943054199	-0.01926146	No
row_11	FAM48A	null	null	810	2.44378399848938	-0.013569886	No
row_12	JMJD1C	null	null	871	2.376837968826294	-0.013736543	No
row_13	TNFAIP3	null	null	942	2.3188459873199463	-0.0153677575	No
row_14	ZCCHC8	null	null	1044	2.2076950073242188	-0.021539101	No
row_15	PRPF38B	null	null	1159	2.107991933822632	-0.029614368	No
row_16	NCOA3	null	null	1199	2.075808048248291	-0.026705455	No
row_17	DAAM1	null	null	1206	2.0655879974365234	-0.018963499	No
row_18	NOC3L	null	null	1214	2.0655879974365234	-0.011368	No
row_19	KLF5	null	null	1300	1.9914870262145996	-0.015196051	No
row_20	ZNF35	null	null	1316	1.9830540418624878	-0.008772198	No
row_21	TLK2	null	null	1471	1.8729820251464844	-0.022705697	No
row_22	PTN	null	null	1502	1.8539589643478394	-0.01847868	No
row_23	MARCH7	null	null	1548	1.8239959478378296	-0.016448501	No
row_24	BACH1	null	null	1642	1.7747780084609985	-0.021448199	No
row_25	SOX30	null	null	1662	1.764557957649231	-0.015610168	No
row_26	SCYL3	null	null	1715	1.7400150299072266	-0.0146051785	No
row_27	IER2	null	null	1717	1.7400150299072266	-0.006130945	No
row_28	C6ORF62	null	null	1731	1.7259290218353271	5.8581977E-4	No
row_29	ZNF267	null	null	1764	1.7167860269546509	0.0045199245	No
row_30	TIPARP	null	null	1813	1.6862200498580933	0.006110737	No
row_31	CARS	null	null	1890	1.6498390436172485	0.0036007883	No
row_32	C14ORF138	null	null	2023	1.581786036491394	-0.007110684	No
row_33	PCTK2	null	null	2173	1.5143649578094482	-0.020311905	No
row_34	FNBP4	null	null	2419	1.4134999513626099	-0.047572877	No
row_35	STC2	null	null	2485	1.3873029947280884	-0.048471816	No
row_36	TDG	null	null	2492	1.3830870389938354	-0.040729858	No
row_37	CAB39	null	null	2654	1.3224799633026123	-0.05568855	No
row_38	SEC24A	null	null	2792	1.2741750478744507	-0.0671323	No
row_39	DMTF1	null	null	3007	1.209097981452942	-0.089853145	No
row_40	LIG4	null	null	3093	1.183182954788208	-0.093681194	No
row_41	MORC3	null	null	3178	1.1587270498275757	-0.097362794	No
row_42	CREM	null	null	3195	1.153749942779541	-0.0910854	No
row_43	CEBPG	null	null	3197	1.1525139808654785	-0.08261116	No
row_44	HRH1	null	null	3215	1.1488289833068848	-0.07648022	No
row_45	RIPK2	null	null	3216	1.1488289833068848	-0.06785953	No
row_46	LIF	null	null	3224	1.1463890075683594	-0.06026403	No
row_47	PELI1	null	null	3250	1.1391500234603882	-0.055304736	No
row_48	KIN	null	null	3377	1.1046639680862427	-0.065137476	No
row_49	NUPL1	null	null	3908	0.9547640085220337	-0.13413835	No
row_50	C2ORF42	null	null	4012	0.926734983921051	-0.1406026	No
row_51	SCG5	null	null	4120	0.896282970905304	-0.14765267	No
row_52	C1ORF27	null	null	4245	0.8684679865837097	-0.1571925	No
row_53	C21ORF91	null	null	4291	0.8595790266990662	-0.15516232	No
row_54	TRPC1	null	null	4626	0.7820770144462585	-0.19545786	Yes
row_55	SEC31A	null	null	4649	0.7763310074806213	-0.1900592	Yes
row_56	NFKBIA	null	null	4660	0.7721999883651733	-0.18290307	Yes
row_57	ZNF14	null	null	4731	0.7545740008354187	-0.18453428	Yes
row_58	ARNTL	null	null	4737	0.7526050209999084	-0.17664587	Yes
row_59	JMJD1A	null	null	4743	0.7511330246925354	-0.16875745	Yes
row_60	NSUN6	null	null	4755	0.7496669888496399	-0.16174778	Yes
row_61	TANK	null	null	4860	0.7222489714622498	-0.16835849	Yes
row_62	CDK7	null	null	4949	0.6981890201568604	-0.17262591	Yes
row_63	C10ORF137	null	null	5052	0.6762160062789917	-0.17894371	Yes
row_64	CLK1	null	null	5119	0.6560879945755005	-0.1799891	Yes
row_65	ZNF131	null	null	5128	0.6549090147018433	-0.17254005	Yes
row_66	TNFRSF10B	null	null	5274	0.6220530271530151	-0.18515545	Yes
row_67	RBBP6	null	null	5294	0.6173499822616577	-0.17931743	Yes
row_68	IL8	null	null	5390	0.5973100066184998	-0.18461004	Yes
row_69	BIRC2	null	null	5392	0.596966028213501	-0.1761358	Yes
row_70	NRBF2	null	null	5395	0.5962799787521362	-0.16780803	Yes
row_71	ARID4B	null	null	5399	0.5952529907226562	-0.15962669	Yes
row_72	SFRS12	null	null	5439	0.5861170291900635	-0.15671778	Yes
row_73	TPTE	null	null	5619	0.5446329712867737	-0.17431268	Yes
row_74	GAD1	null	null	5638	0.5400919914245605	-0.1683282	Yes
row_75	BIRC3	null	null	5642	0.5391889810562134	-0.16014688	Yes
row_76	EIF5	null	null	5698	0.5249969959259033	-0.15958124	Yes
row_77	CNOT2	null	null	5713	0.5218089818954468	-0.15301093	Yes
row_78	F3	null	null	5770	0.5087249875068665	-0.15259178	Yes
row_79	ZNF184	null	null	5771	0.5087249875068665	-0.14397109	Yes
row_80	TBK1	null	null	5855	0.49223101139068604	-0.14750622	Yes
row_81	CENPC1	null	null	5857	0.49223101139068604	-0.13903199	Yes
row_82	SLTM	null	null	5864	0.49061501026153564	-0.13129003	Yes
row_83	TBX3	null	null	5887	0.4821000099182129	-0.12589137	Yes
row_84	ZCCHC6	null	null	5893	0.48078399896621704	-0.11800296	Yes
row_85	ZNF180	null	null	5912	0.4784260094165802	-0.11201847	Yes
row_86	POLR3F	null	null	5949	0.47065600752830505	-0.10867019	Yes
row_87	WAC	null	null	5980	0.4605090022087097	-0.10444318	Yes
row_88	CNOT4	null	null	6035	0.44985800981521606	-0.103731096	Yes
row_89	ZNF331	null	null	6082	0.4394629895687103	-0.10184737	Yes
row_90	ZZZ3	null	null	6087	0.4389849901199341	-0.09381251	Yes
row_91	IFRD1	null	null	6109	0.4337669909000397	-0.088267386	Yes
row_92	RBM39	null	null	6245	0.3949970006942749	-0.09941823	Yes
row_93	CRY1	null	null	6251	0.39263200759887695	-0.09152982	Yes
row_94	GEM	null	null	6314	0.37539198994636536	-0.09198938	Yes
row_95	C1ORF103	null	null	6320	0.37415701150894165	-0.08410098	Yes
row_96	ING3	null	null	6411	0.34919700026512146	-0.088661306	Yes
row_97	PTPN2	null	null	6421	0.34668099880218506	-0.081358716	Yes
row_98	CEP76	null	null	6431	0.3432219922542572	-0.074056126	Yes
row_99	ZNF468	null	null	6437	0.3416939973831177	-0.06616772	Yes
row_100	ZNF557	null	null	6456	0.3356330096721649	-0.060183235	Yes
row_101	CHD9	null	null	6458	0.33544498682022095	-0.051709	Yes
row_102	ADNP	null	null	6471	0.33076998591423035	-0.04484578	Yes
row_103	SNX16	null	null	6506	0.3202959895133972	-0.041204587	Yes
row_104	TAF2	null	null	6520	0.3174000084400177	-0.03448782	Yes
row_105	KIAA0907	null	null	6527	0.31578001379966736	-0.026745867	Yes
row_106	RCHY1	null	null	6543	0.31024500727653503	-0.020322014	Yes
row_107	CLK4	null	null	6580	0.29972898960113525	-0.016973732	Yes
row_108	FEM1C	null	null	6706	0.255950003862381	-0.026660014	Yes
row_109	INTS6	null	null	6745	0.2399660050868988	-0.023604643	Yes
row_110	PMAIP1	null	null	6763	0.23130099475383759	-0.017473701	Yes
row_111	AGTPBP1	null	null	6783	0.22179099917411804	-0.011635671	Yes
row_112	SUV420H1	null	null	6785	0.22077900171279907	-0.0031614376	Yes
row_113	ZCCHC10	null	null	6843	0.1939069926738739	-0.002888727	Yes
row_114	ZNF451	null	null	6897	0.14882899820804596	-0.002030193	Yes
row_115	CCNT2	null	null	6901	0.14675399661064148	0.006151129	Yes
