# Supplementary material for: Signatures of RNA binding proteins globally coupled to effective microRNA target sites
Source: HighWire-hosted journal article supplement (doi:10.1101/gr.103259.109), 2010-05-27
Supplement: Table_S13.zip [file CHESLER_HIGHEST_FOLD_RANGE_GENES.xls]

NAME	PROBE	GENE SYMBOL	GENE_TITLE	RANK IN GENE LIST	RANK METRIC SCORE	RUNNING ES	CORE ENRICHMENT
row_0	GRIA2	null	null	65	3.699057102203369	0.036064196	Yes
row_1	LIN7C	null	null	110	3.699057102203369	0.0751622	Yes
row_2	GNB1	null	null	355	3.221935987472534	0.085366815	Yes
row_3	PPP1CB	null	null	480	2.9209060668945312	0.11290747	Yes
row_4	ATP11A	null	null	501	2.9209060668945312	0.15547268	Yes
row_5	MLL5	null	null	640	2.699057102203369	0.18099079	Yes
row_6	PRKCE	null	null	931	2.3188459873199463	0.18454993	Yes
row_7	PPID	null	null	946	2.301116943359375	0.22798194	Yes
row_8	MATR3	null	null	957	2.301116943359375	0.27199182	Yes
row_9	A4GALT	null	null	974	2.2840840816497803	0.31513488	Yes
row_10	KCTD12	null	null	1068	2.1805429458618164	0.34715402	Yes
row_11	HINT1	null	null	1162	2.096997022628784	0.37917313	Yes
row_12	ANKRD13C	null	null	1322	1.9747810363769531	0.40165743	Yes
row_13	ATP13A3	null	null	1325	1.9747810363769531	0.44682306	Yes
row_14	MARCH7	null	null	1548	1.8239959478378296	0.46020594	Yes
row_15	SYT1	null	null	3296	1.1273479461669922	0.2532768	No
row_16	ACSL4	null	null	3487	1.0706679821014404	0.2712826	No
row_17	GLO1	null	null	3554	1.0536350011825562	0.30720237	No
row_18	PLP1	null	null	6290	0.38120201230049133	-0.04246012	No
row_19	SCD	null	null	6349	0.36682000756263733	-0.005384654	No
row_20	SCN1A	null	null	6788	0.22063499689102173	-0.023206618	No
row_21	SP3	null	null	6877	0.1636359989643097	0.009534841	No
