# Supplementary material for: Signatures of RNA binding proteins globally coupled to effective microRNA target sites
Source: HighWire-hosted journal article supplement (doi:10.1101/gr.103259.109), 2010-05-27
Supplement: Table_S13.zip [file CMV_8HRS_DN.xls]

NAME	PROBE	GENE SYMBOL	GENE_TITLE	RANK IN GENE LIST	RANK METRIC SCORE	RUNNING ES	CORE ENRICHMENT
row_0	GAS1	null	null	59	3.699057102203369	0.033140656	Yes
row_1	ACVR2A	null	null	100	3.699057102203369	0.06902698	Yes
row_2	TCF7L2	null	null	538	2.853959083557129	0.047543358	Yes
row_3	MARCKS	null	null	625	2.699057102203369	0.07678228	Yes
row_4	MN1	null	null	869	2.398026943206787	0.08333334	Yes
row_5	ADRA2A	null	null	1085	2.154989004135132	0.09393065	Yes
row_6	TGFBR3	null	null	1126	2.130855083465576	0.12981696	Yes
row_7	NR2F2	null	null	1583	1.8014299869537354	0.10558768	Yes
row_8	TNFRSF1A	null	null	1661	1.764557957649231	0.13612719	Yes
row_9	ADM	null	null	2750	1.2891240119934082	0.020568423	Yes
row_10	ZFP36L1	null	null	2834	1.2597240209579468	0.05024087	Yes
row_11	MYH9	null	null	2835	1.2597240209579468	0.09190754	Yes
row_12	ID2	null	null	3046	1.197998046875	0.103227384	Yes
row_13	TP53BP1	null	null	3065	1.1912009716033936	0.1422929	Yes
row_14	WEE1	null	null	3122	1.1740119457244873	0.17586708	Yes
row_15	NR3C1	null	null	3202	1.1512819528579712	0.20611757	Yes
row_16	ANAPC1	null	null	3209	1.1500539779663086	0.24691717	Yes
row_17	USP4	null	null	3253	1.1379549503326416	0.28236997	Yes
row_18	TFAP2A	null	null	3328	1.1181319952011108	0.313343	Yes
row_19	BMP4	null	null	3452	1.082056999206543	0.3372351	Yes
row_20	ORMDL2	null	null	3851	0.9682750105857849	0.32138732	Yes
row_21	HNMT	null	null	4023	0.9252700209617615	0.338343	Yes
row_22	ZCCHC9	null	null	5945	0.47245699167251587	0.10240853	No
row_23	IGF1R	null	null	6570	0.30129098892211914	0.053901784	No
