# Supplementary material for: Signatures of RNA binding proteins globally coupled to effective microRNA target sites
Source: HighWire-hosted journal article supplement (doi:10.1101/gr.103259.109), 2010-05-27
Supplement: Table_S13.zip [file gene_set_sizes.xls]

NAME	ORIGINAL SIZE	AFTER RESTRICTING TO DATASET	STATUS
NUCLEOPLASM	279	130
EXTRINSIC_TO_PLASMA_MEMBRANE	13		Rejected!
ORGANELLE_PART	1197	476
CELL_PROJECTION_PART	19		Rejected!
CYTOPLASMIC_VESICLE_MEMBRANE	28		Rejected!
GOLGI_MEMBRANE	45	22
MITOCHONDRIAL_OUTER_MEMBRANE	18		Rejected!
ORGANELLAR_RIBOSOME	22		Rejected!
ORGANELLAR_SMALL_RIBOSOMAL_SUBUNIT	11		Rejected!
INTRINSIC_TO_ENDOPLASMIC_RETICULUM_MEMBRANE	24		Rejected!
BRUSH_BORDER	10		Rejected!
MITOCHONDRIAL_SMALL_RIBOSOMAL_SUBUNIT	11		Rejected!
PROTEINACEOUS_EXTRACELLULAR_MATRIX	98	52
INTRINSIC_TO_PLASMA_MEMBRANE	992	346
ORGANELLE_INNER_MEMBRANE	75	19
OLIGOSACCHARYL_TRANSFERASE_COMPLEX	10		Rejected!
ADHERENS_JUNCTION	23		Rejected!
PEROXISOMAL_MEMBRANE	13		Rejected!
SARCOMERE	14		Rejected!
EXTERNAL_SIDE_OF_PLASMA_MEMBRANE	16		Rejected!
EUKARYOTIC_TRANSLATION_INITIATION_FACTOR_3_COMPLEX	10		Rejected!
VESICULAR_FRACTION	44	19
EXTRACELLULAR_MATRIX_PART	57	32
CELL_SURFACE	79	36
CELL_JUNCTION	83	35
MITOCHONDRIAL_PART	142	37
PROTEIN_SERINE_THREONINE_PHOSPHATASE_COMPLEX	10		Rejected!
AXON	12		Rejected!
RIBONUCLEOPROTEIN_COMPLEX	143	47
COATED_VESICLE	47	20
MICROTUBULE_ASSOCIATED_COMPLEX	47	19
CHROMATIN	35		Rejected!
SYNAPSE_PART	13		Rejected!
INTERMEDIATE_FILAMENT_CYTOSKELETON	24		Rejected!
MEMBRANE_BOUND_VESICLE	117	53
NUCLEAR_REPLICATION_FORK	10		Rejected!
MICROTUBULE_CYTOSKELETON	152	64
EXTRACELLULAR_REGION	448	151
SPINDLE_POLE	18		Rejected!
LATE_ENDOSOME	12		Rejected!
INTRINSIC_TO_MEMBRANE	1350	491
CYTOPLASMIC_PART	1385		Rejected!
VESICLE_COAT	16		Rejected!
CONTRACTILE_FIBER	25		Rejected!
MYOFIBRIL	19		Rejected!
MITOCHONDRIAL_MEMBRANE	86	20
INTEGRAL_TO_GOLGI_MEMBRANE	10		Rejected!
SMALL_NUCLEAR_RIBONUCLEOPROTEIN_COMPLEX	22		Rejected!
NUCLEAR_CHROMOSOME	54	19
MEMBRANE_PART	1673		Rejected!
GOLGI_APPARATUS	227	108
CHROMATIN_REMODELING_COMPLEX	17		Rejected!
TIGHT_JUNCTION	31		Rejected!
INTEGRAL_TO_ENDOPLASMIC_RETICULUM_MEMBRANE	24		Rejected!
BASEMENT_MEMBRANE	37	21
INTERCELLULAR_JUNCTION	66	27
LYTIC_VACUOLE	61	25
MICROTUBULE_ORGANIZING_CENTER_PART	19		Rejected!
MEMBRANE	1998		Rejected!
CORNIFIED_ENVELOPE	14		Rejected!
NUCLEAR_PART	579	231
CYTOPLASM	2137		Rejected!
NADH_DEHYDROGENASE_COMPLEX	15		Rejected!
ORGANELLE_LUMEN	458	184
UBIQUITIN_LIGASE_COMPLEX	26		Rejected!
BASAL_LAMINA	21		Rejected!
ENDOPLASMIC_RETICULUM_MEMBRANE	85	34
ENDOPLASMIC_RETICULUM	294	116
NUCLEAR_LUMEN	387	160
KINESIN_COMPLEX	14		Rejected!
NON_MEMBRANE_BOUND_ORGANELLE	632	242
DNA_DIRECTED_RNA_POLYMERASE_COMPLEX	18		Rejected!
INSOLUBLE_FRACTION	15		Rejected!
VESICLE	124	57
CYTOSOLIC_PART	23		Rejected!
CYTOSKELETAL_PART	235	97
GOLGI_APPARATUS_PART	100	47
PROTEASOME_COMPLEX	23		Rejected!
PORE_COMPLEX	36		Rejected!
NUCLEUS	1433		Rejected!
SPINDLE	39	16
INTERCALATED_DISC	10		Rejected!
VACUOLE	69	28
CELL_FRACTION	493	183
CYTOSOL	205	79
ORGANELLE_MEMBRANE	299	116
CYTOSKELETON	368	150
LAMELLIPODIUM	26		Rejected!
SYNAPTIC_VESICLE	15		Rejected!
NUCLEAR_MATRIX	12		Rejected!
NUCLEAR_ENVELOPE_ENDOPLASMIC_RETICULUM_NETWORK	94	39
ENDOCYTIC_VESICLE	14		Rejected!
IMMUNOLOGICAL_SYNAPSE	11		Rejected!
PEROXISOMAL_PART	14		Rejected!
CYTOPLASMIC_VESICLE	119	54
CHROMOSOME__PERICENTRIC_REGION	31		Rejected!
VOLTAGE_GATED_CALCIUM_CHANNEL_COMPLEX	15		Rejected!
ANCHORED_TO_MEMBRANE	13		Rejected!
MEDIATOR_COMPLEX	18		Rejected!
MITOCHONDRIAL_MATRIX	46		Rejected!
VACUOLAR_PART	13		Rejected!
INTEGRATOR_COMPLEX	13		Rejected!
VOLTAGE_GATED_POTASSIUM_CHANNEL_COMPLEX	40		Rejected!
MICROSOME	42	17
OUTER_MEMBRANE	25		Rejected!
DYSTROPHIN_ASSOCIATED_GLYCOPROTEIN_COMPLEX	14		Rejected!
HISTONE_DEACETYLASE_COMPLEX	20		Rejected!
EXTRACELLULAR_REGION_PART	339	126
APICAL_JUNCTION_COMPLEX	35		Rejected!
CELL_CORTEX_PART	24		Rejected!
ENVELOPE	169	53
MICROBODY_MEMBRANE	13		Rejected!
MITOCHONDRIAL_LUMEN	46		Rejected!
EARLY_ENDOSOME	18		Rejected!
PERINUCLEAR_REGION_OF_CYTOPLASM	54	27
CYTOPLASMIC_VESICLE_PART	28		Rejected!
CELL_CORTEX	39	18
INTEGRAL_TO_MEMBRANE	1332	486
SPINDLE_MICROTUBULE	16		Rejected!
CELL_SUBSTRATE_ADHERENS_JUNCTION	16		Rejected!
ENDOMEMBRANE_SYSTEM	220	93
HETEROGENEOUS_NUCLEAR_RIBONUCLEOPROTEIN_COMPLEX	14		Rejected!
LYSOSOMAL_MEMBRANE	10		Rejected!
DNA_DIRECTED_RNA_POLYMERASE_II__CORE_COMPLEX	13		Rejected!
INTERMEDIATE_FILAMENT	24		Rejected!
MITOCHONDRIAL_RESPIRATORY_CHAIN_COMPLEX_I	15		Rejected!
CONDENSED_NUCLEAR_CHROMOSOME	18		Rejected!
NUCLEAR_BODY	33	17
CELL_MATRIX_JUNCTION	18		Rejected!
MYOSIN_COMPLEX	16		Rejected!
CONTRACTILE_FIBER_PART	23		Rejected!
MICROTUBULE	32		Rejected!
ORGANELLE_OUTER_MEMBRANE	24		Rejected!
ORGANELLE_ENVELOPE	169	53
LIPID_RAFT	29		Rejected!
INTEGRAL_TO_PLASMA_MEMBRANE	978	341
CELL_PROJECTION	109	48
SPLICEOSOME	51	15
NUCLEAR_UBIQUITIN_LIGASE_COMPLEX	11		Rejected!
VACUOLAR_MEMBRANE	11		Rejected!
ACTIN_FILAMENT	18		Rejected!
RUFFLE	32	16
RIBOSOME	39		Rejected!
ENDOSOME	67	34
NUCLEAR_ENVELOPE	73	30
MEMBRANE_ENCLOSED_LUMEN	458	184
DNA_DIRECTED_RNA_POLYMERASE_II__HOLOENZYME	67	28
MITOCHONDRIAL_INNER_MEMBRANE	67		Rejected!
APICAL_PART_OF_CELL	17		Rejected!
CLATHRIN_COATED_VESICLE	37	17
MICROTUBULE_ORGANIZING_CENTER	67	32
COATED_VESICLE_MEMBRANE	17		Rejected!
NICOTINIC_ACETYLCHOLINE_GATED_RECEPTOR_CHANNEL_COMPLEX	11		Rejected!
TRANSPORT_VESICLE	33	19
CELL_SOMA	10		Rejected!
REPLICATION_FORK	18		Rejected!
ACTIN_CYTOSKELETON	129	59
U12_DEPENDENT_SPLICEOSOME	11		Rejected!
RNA_POLYMERASE_COMPLEX	18		Rejected!
CYTOPLASMIC_MEMBRANE_BOUND_VESICLE	115	52
NUCLEAR_DNA_DIRECTED_RNA_POLYMERASE_COMPLEX	18		Rejected!
MICROBODY_PART	14		Rejected!
DENDRITE	16		Rejected!
MEMBRANE_FRACTION	339	128
KINETOCHORE	25		Rejected!
NUCLEAR_CHROMATIN	14		Rejected!
NUCLEOPLASM_PART	211	99
RECEPTOR_COMPLEX	56	21
SECRETORY_GRANULE	18		Rejected!
BASOLATERAL_PLASMA_MEMBRANE	35	18
INTEGRAL_TO_ORGANELLE_MEMBRANE	50	23
EXTRACELLULAR_SPACE	246	75
MITOCHONDRIAL_RESPIRATORY_CHAIN	24		Rejected!
GOLGI_STACK	13		Rejected!
FOCAL_ADHESION	13		Rejected!
ER_GOLGI_INTERMEDIATE_COMPARTMENT	24		Rejected!
INTRACELLULAR_NON_MEMBRANE_BOUND_ORGANELLE	632	242
MEMBRANE_COAT	17		Rejected!
CENTROSOME	58	30
PROTON_TRANSPORTING_TWO_SECTOR_ATPASE_COMPLEX	15		Rejected!
NUCLEAR_MEMBRANE	50	21
INTRACELLULAR_ORGANELLE_PART	1192	474
MACROMOLECULAR_COMPLEX	945	361
NUCLEAR_PORE	31		Rejected!
NUCLEOLAR_PART	18		Rejected!
MITOCHONDRION	343	94
MITOCHONDRIAL_ENVELOPE	97	24
CORTICAL_CYTOSKELETON	20		Rejected!
TRANS_GOLGI_NETWORK	21		Rejected!
RESPIRATORY_CHAIN_COMPLEX_I	15		Rejected!
EXTRACELLULAR_MATRIX	100	52
SMALL_RIBOSOMAL_SUBUNIT	11		Rejected!
TRANSCRIPTION_FACTOR_TFIID_COMPLEX	14		Rejected!
MITOCHONDRIAL_RIBOSOME	22		Rejected!
APICAL_PLASMA_MEMBRANE	14		Rejected!
MICROBODY	47	18
CHROMOSOMAL_PART	96	38
APICOLATERAL_PLASMA_MEMBRANE	35		Rejected!
CONDENSED_CHROMOSOME	34	15
NUCLEAR_MEMBRANE_PART	42	15
GOLGI_ASSOCIATED_VESICLE	29		Rejected!
TRANSCRIPTION_FACTOR_COMPLEX	89	42
LEADING_EDGE	48	23
LYSOSOME	61	25
PROTEIN_COMPLEX	816	318
EXTRINSIC_TO_MEMBRANE	25		Rejected!
SYNAPSE	27		Rejected!
INTRINSIC_TO_ORGANELLE_MEMBRANE	52	23
ANCHORED_TO_PLASMA_MEMBRANE	13		Rejected!
INTRINSIC_TO_GOLGI_MEMBRANE	15		Rejected!
SITE_OF_POLARIZED_GROWTH	11		Rejected!
NUCLEAR_SPECK	11		Rejected!
PML_BODY	14		Rejected!
RIBOSOMAL_SUBUNIT	20		Rejected!
CORTICAL_ACTIN_CYTOSKELETON	13		Rejected!
ENDOPLASMIC_RETICULUM_LUMEN	14		Rejected!
COLLAGEN	23	16
MITOCHONDRIAL_MEMBRANE_PART	53		Rejected!
MICROVILLUS	11		Rejected!
COATED_MEMBRANE	17		Rejected!
INTEGRIN_COMPLEX	19		Rejected!
GROWTH_CONE	10		Rejected!
TRANS_GOLGI_NETWORK_TRANSPORT_VESICLE	13		Rejected!
ENDOPLASMIC_RETICULUM_PART	97	38
PLASMA_MEMBRANE_PART	1160	423
NEURON_PROJECTION	21		Rejected!
PLASMA_MEMBRANE	1429		Rejected!
PEROXISOME	47	18
NUCLEOLUS	126	42
SOLUBLE_FRACTION	161	55
VESICLE_MEMBRANE	30		Rejected!
CHROMOSOME	124	52
NUCLEAR_CHROMOSOME_PART	34		Rejected!
TRNA_PROCESSING	10		Rejected!
REGULATION_OF_BIOLOGICAL_QUALITY	420	165
DNA_METABOLIC_PROCESS	257	100
AMINO_SUGAR_METABOLIC_PROCESS	19		Rejected!
BIOPOLYMER_CATABOLIC_PROCESS	117	47
RNA_METABOLIC_PROCESS	843	412
GLUCAN_METABOLIC_PROCESS	10		Rejected!
PROTEIN_POLYUBIQUITINATION	11		Rejected!
PROTEIN_OLIGOMERIZATION	40	18
REGULATION_OF_TRANSFORMING_GROWTH_FACTOR_BETA_RECEPTOR_SIGNALING_PATHWAY	14		Rejected!
DNA_REPAIR	125	51
POSITIVE_REGULATION_OF_TRANSLATION	35		Rejected!
RESPONSE_TO_VIRUS	50	20
MUSCLE_DEVELOPMENT	93	34
POSITIVE_REGULATION_OF_CELL_DIFFERENTIATION	25		Rejected!
MITOTIC_CELL_CYCLE_CHECKPOINT	21		Rejected!
ACTIN_FILAMENT_ORGANIZATION	24		Rejected!
PROTEIN_FOLDING	58	23
REGULATION_OF_RHO_PROTEIN_SIGNAL_TRANSDUCTION	15		Rejected!
AXON_GUIDANCE	22		Rejected!
LIPID_CATABOLIC_PROCESS	38		Rejected!
PHOSPHOLIPID_BIOSYNTHETIC_PROCESS	39		Rejected!
NEGATIVE_REGULATION_OF_NUCLEOBASE__NUCLEOSIDE__NUCLEOTIDE_AND_NUCLEIC_ACID_METABOLIC_PROCESS	211	112
CYTOKINESIS	19		Rejected!
SPLICEOSOME_ASSEMBLY	21		Rejected!
GLYCEROPHOSPHOLIPID_BIOSYNTHETIC_PROCESS	30		Rejected!
NUCLEOBASE__NUCLEOSIDE_AND_NUCLEOTIDE_METABOLIC_PROCESS	52	23
NUCLEAR_IMPORT	50	22
POSITIVE_REGULATION_OF_PHOSPHATE_METABOLIC_PROCESS	28		Rejected!
NEGATIVE_REGULATION_OF_CELLULAR_METABOLIC_PROCESS	259	128
REGULATION_OF_HYDROLASE_ACTIVITY	80	34
PROTEIN_AUTOPROCESSING	32	15
POSITIVE_REGULATION_OF_RESPONSE_TO_STIMULUS	41	17
REGULATION_OF_CELLULAR_PH	10		Rejected!
NEGATIVE_REGULATION_OF_MULTICELLULAR_ORGANISMAL_PROCESS	32		Rejected!
REGULATION_OF_SECRETION	40		Rejected!
SYSTEM_DEVELOPMENT	863	332
BIOGENIC_AMINE_METABOLIC_PROCESS	17		Rejected!
POSITIVE_REGULATION_OF_SIGNAL_TRANSDUCTION	126	64
ESTABLISHMENT_OF_PROTEIN_LOCALIZATION	191	78
HEMOSTASIS	48	20
G_PROTEIN_SIGNALING__ADENYLATE_CYCLASE_INHIBITING_PATHWAY	10		Rejected!
ENZYME_LINKED_RECEPTOR_PROTEIN_SIGNALING_PATHWAY	140	85
GLUCOSE_METABOLIC_PROCESS	28		Rejected!
REGULATION_OF_DEFENSE_RESPONSE	20		Rejected!
LYSOSOME_ORGANIZATION_AND_BIOGENESIS	11		Rejected!
POSITIVE_REGULATION_OF_TRANSCRIPTION__DNA_DEPENDENT	118	69
TISSUE_MORPHOGENESIS	14		Rejected!
G_PROTEIN_SIGNALING__COUPLED_TO_IP3_SECOND_MESSENGER__PHOSPHOLIPASE_C_ACTIVATING	45	17
ONE_CARBON_COMPOUND_METABOLIC_PROCESS	26		Rejected!
NEGATIVE_REGULATION_OF_DNA_METABOLIC_PROCESS	18		Rejected!
GLYCOLIPID_METABOLIC_PROCESS	16		Rejected!
MULTI_ORGANISM_PROCESS	166	50
INORGANIC_ANION_TRANSPORT	18		Rejected!
POSITIVE_REGULATION_OF_CELL_PROLIFERATION	150	55
REGULATION_OF_DNA_BINDING	47	19
CHROMATIN_REMODELING	25		Rejected!
SYNAPTOGENESIS	18		Rejected!
JAK_STAT_CASCADE	31		Rejected!
NERVOUS_SYSTEM_DEVELOPMENT	386	154
GLYCOPROTEIN_METABOLIC_PROCESS	90	41
CELL_DEVELOPMENT	579	214
INSULIN_RECEPTOR_SIGNALING_PATHWAY	19		Rejected!
NEGATIVE_REGULATION_OF_CELLULAR_PROTEIN_METABOLIC_PROCESS	45		Rejected!
NEGATIVE_REGULATION_OF_APOPTOSIS	150	53
VIRAL_GENOME_REPLICATION	21		Rejected!
ESTABLISHMENT_OF_LOCALIZATION	872	326
REGULATION_OF_KINASE_ACTIVITY	157	65
CELL_ACTIVATION	77	23
NEURITE_DEVELOPMENT	53	20
HORMONE_SECRETION	17		Rejected!
REGULATION_OF_PROTEIN_KINASE_ACTIVITY	155	63
N_TERMINAL_PROTEIN_AMINO_ACID_MODIFICATION	11		Rejected!
BIOPOLYMER_METABOLIC_PROCESS	1687		Rejected!
PROTEIN_AMINO_ACID_N_LINKED_GLYCOSYLATION	30		Rejected!
AMINO_ACID_TRANSPORT	26		Rejected!
FEMALE_PREGNANCY	54		Rejected!
ENERGY_RESERVE_METABOLIC_PROCESS	15		Rejected!
CHROMATIN_ASSEMBLY	16		Rejected!
NEGATIVE_REGULATION_OF_TRANSPORT	20		Rejected!
POSITIVE_REGULATION_OF_TRANSCRIPTION_FROM_RNA_POLYMERASE_II_PROMOTER	65	38
ISOPRENOID_METABOLIC_PROCESS	12		Rejected!
SPERMATID_DEVELOPMENT	10		Rejected!
GLUTAMATE_SIGNALING_PATHWAY	17		Rejected!
PROTEIN_TARGETING_TO_MITOCHONDRION	11		Rejected!
TUBE_MORPHOGENESIS	15		Rejected!
REGULATION_OF_CYTOKINE_SECRETION	16		Rejected!
MACROMOLECULAR_COMPLEX_ASSEMBLY	280	135
DI___TRI_VALENT_INORGANIC_CATION_TRANSPORT	32	17
DETECTION_OF_ABIOTIC_STIMULUS	19		Rejected!
REGULATION_OF_RESPONSE_TO_EXTERNAL_STIMULUS	15		Rejected!
COFACTOR_METABOLIC_PROCESS	54	19
REGULATION_OF_HORMONE_SECRETION	14		Rejected!
ORGANIC_ACID_TRANSPORT	42		Rejected!
POSITIVE_REGULATION_OF_PHOSPHORYLATION	26		Rejected!
G2_M_TRANSITION_OF_MITOTIC_CELL_CYCLE	13		Rejected!
T_CELL_PROLIFERATION	19		Rejected!
FEMALE_GAMETE_GENERATION	17		Rejected!
PROTEIN_TETRAMERIZATION	14		Rejected!
REGULATION_OF_TYROSINE_PHOSPHORYLATION_OF_STAT_PROTEIN	10		Rejected!
FATTY_ACID_BETA_OXIDATION	11		Rejected!
POSITIVE_REGULATION_OF_IMMUNE_SYSTEM_PROCESS	51	19
REGULATION_OF_ANATOMICAL_STRUCTURE_MORPHOGENESIS	26		Rejected!
FOCAL_ADHESION_FORMATION	10		Rejected!
SECRETORY_PATHWAY	84	37
PEROXISOME_ORGANIZATION_AND_BIOGENESIS	16		Rejected!
MEIOSIS_I	20		Rejected!
MEMBRANE_LIPID_METABOLIC_PROCESS	101	34
REGULATION_OF_LIPID_METABOLIC_PROCESS	12		Rejected!
REGULATION_OF_MOLECULAR_FUNCTION	325	134
REGULATION_OF_DNA_REPLICATION	20		Rejected!
SIGNAL_TRANSDUCTION	1637		Rejected!
NEGATIVE_REGULATION_OF_CELLULAR_BIOSYNTHETIC_PROCESS	29		Rejected!
DEVELOPMENTAL_MATURATION	18		Rejected!
NUCLEOBASE__NUCLEOSIDE__NUCLEOTIDE_AND_NUCLEIC_ACID_METABOLIC_PROCESS	1246		Rejected!
REGULATION_OF_PROTEIN_AMINO_ACID_PHOSPHORYLATION	30		Rejected!
RESPONSE_TO_ENDOGENOUS_STIMULUS	200	83
GLYCOPROTEIN_CATABOLIC_PROCESS	12		Rejected!
REPRODUCTIVE_PROCESS	163	54
SECRETION_BY_CELL	117	46
PATTERN_SPECIFICATION_PROCESS	31	17
PHOSPHOLIPASE_C_ACTIVATION	14		Rejected!
CELL_SURFACE_RECEPTOR_LINKED_SIGNAL_TRANSDUCTION_GO_0007166	642	263
LYMPHOCYTE_DIFFERENTIATION	26		Rejected!
CELL_STRUCTURE_DISASSEMBLY_DURING_APOPTOSIS	18		Rejected!
NUCLEOBASE__NUCLEOSIDE__NUCLEOTIDE_AND_NUCLEIC_ACID_TRANSPORT	32		Rejected!
CYCLIC_NUCLEOTIDE_METABOLIC_PROCESS	11		Rejected!
DETECTION_OF_STIMULUS_INVOLVED_IN_SENSORY_PERCEPTION	21		Rejected!
RESPONSE_TO_NUTRIENT	17		Rejected!
ACTIVATION_OF_JNK_ACTIVITY	16		Rejected!
REGULATION_OF_SYNAPSE_STRUCTURE_AND_ACTIVITY	11		Rejected!
SULFUR_METABOLIC_PROCESS	37	15
NEGATIVE_REGULATION_OF_HYDROLASE_ACTIVITY	14		Rejected!
BIOSYNTHETIC_PROCESS	470	167
TRANSCRIPTION__DNA_DEPENDENT	637	331
STRIATED_MUSCLE_DEVELOPMENT	40	16
M_PHASE	114	42
REGULATION_OF_CELL_MIGRATION	28		Rejected!
PROTEIN_MATURATION	11		Rejected!
COENZYME_METABOLIC_PROCESS	38		Rejected!
CYTOPLASM_ORGANIZATION_AND_BIOGENESIS	15		Rejected!
REGULATION_OF_TRANSFERASE_ACTIVITY	161	66
MYOBLAST_DIFFERENTIATION	17		Rejected!
SENSORY_PERCEPTION_OF_TASTE	11		Rejected!
GLUCOSE_CATABOLIC_PROCESS	11		Rejected!
INTRACELLULAR_TRANSPORT	281	116
INTRACELLULAR_PROTEIN_TRANSPORT	145	61
PROGRAMMED_CELL_DEATH	434	156
CENTROSOME_ORGANIZATION_AND_BIOGENESIS	15		Rejected!
HEMOPOIESIS	75	26
MICROTUBULE_BASED_PROCESS	82	35
REGULATION_OF_AXONOGENESIS	10		Rejected!
RESPONSE_TO_EXTRACELLULAR_STIMULUS	33		Rejected!
APOPTOTIC_NUCLEAR_CHANGES	19		Rejected!
INDUCTION_OF_APOPTOSIS_BY_EXTRACELLULAR_SIGNALS	27		Rejected!
SULFUR_COMPOUND_BIOSYNTHETIC_PROCESS	18		Rejected!
GAMETE_GENERATION	114	39
RESPONSE_TO_TOXIN	10		Rejected!
POSITIVE_REGULATION_OF_BINDING	28		Rejected!
CELLULAR_COMPONENT_DISASSEMBLY	33		Rejected!
IMMUNE_SYSTEM_DEVELOPMENT	81	27
POSITIVE_REGULATION_OF_CATALYTIC_ACTIVITY	165	69
TRANSLATIONAL_INITIATION	39	16
PHOTOTRANSDUCTION	13		Rejected!
REGIONALIZATION	15		Rejected!
ORGANELLE_ORGANIZATION_AND_BIOGENESIS	474	187
NEGATIVE_REGULATION_OF_CELL_CYCLE	79	38
HETEROPHILIC_CELL_ADHESION	10		Rejected!
DNA_INTEGRITY_CHECKPOINT	24		Rejected!
STEROID_METABOLIC_PROCESS	71	20
ESTABLISHMENT_OF_CELLULAR_LOCALIZATION	355	142
AEROBIC_RESPIRATION	15		Rejected!
SKELETAL_DEVELOPMENT	103	46
POSITIVE_REGULATION_OF_NUCLEOBASE__NUCLEOSIDE__NUCLEOTIDE_AND_NUCLEIC_ACID_METABOLIC_PROCESS	154	89
REGULATION_OF_GROWTH	58	23
NUCLEAR_TRANSPORT	89	36
NEGATIVE_REGULATION_OF_IMMUNE_SYSTEM_PROCESS	14		Rejected!
REGULATION_OF_PROTEIN_POLYMERIZATION	11		Rejected!
LIPID_TRANSPORT	28		Rejected!
ANATOMICAL_STRUCTURE_MORPHOGENESIS	379	157
CELLULAR_RESPONSE_TO_STRESS	10		Rejected!
POSITIVE_REGULATION_OF_RNA_METABOLIC_PROCESS	120	70
CELLULAR_PROTEIN_CATABOLIC_PROCESS	58	32
REGULATION_OF_MUSCLE_CONTRACTION	19		Rejected!
RESPONSE_TO_LIGHT_STIMULUS	46		Rejected!
POSITIVE_REGULATION_OF_CYTOKINE_BIOSYNTHETIC_PROCESS	25		Rejected!
REGULATION_OF_TRANSLATIONAL_INITIATION	31		Rejected!
NEGATIVE_REGULATION_OF_TRANSCRIPTION__DNA_DEPENDENT	130	69
PROTEIN_TARGETING	109	44
MONOVALENT_INORGANIC_CATION_HOMEOSTASIS	14		Rejected!
VIRAL_INFECTIOUS_CYCLE	32	15
REGULATION_OF_PROTEIN_MODIFICATION_PROCESS	44	19
VIRAL_REPRODUCTIVE_PROCESS	36	17
REGULATION_OF_MITOSIS	41	17
CARBOXYLIC_ACID_METABOLIC_PROCESS	178	62
AXONOGENESIS	43	17
HOMOPHILIC_CELL_ADHESION	16		Rejected!
REGULATION_OF_MAPKKK_CASCADE	20		Rejected!
PROTEIN_AMINO_ACID_AUTOPHOSPHORYLATION	31		Rejected!
INTERCELLULAR_JUNCTION_ASSEMBLY	11		Rejected!
MAINTENANCE_OF_CELLULAR_LOCALIZATION	12		Rejected!
MICROTUBULE_CYTOSKELETON_ORGANIZATION_AND_BIOGENESIS	35		Rejected!
NUCLEAR_ORGANIZATION_AND_BIOGENESIS	30		Rejected!
PURINE_NUCLEOTIDE_METABOLIC_PROCESS	12		Rejected!
PROTEIN_IMPORT	62	27
POST_GOLGI_VESICLE_MEDIATED_TRANSPORT	14		Rejected!
GLUTAMINE_FAMILY_AMINO_ACID_METABOLIC_PROCESS	14		Rejected!
REGULATION_OF_INTERFERON_GAMMA_BIOSYNTHETIC_PROCESS	11		Rejected!
SEXUAL_REPRODUCTION	139	46
INTERPHASE	68	36
NEGATIVE_REGULATION_OF_ANGIOGENESIS	13		Rejected!
MONOCARBOXYLIC_ACID_TRANSPORT	10		Rejected!
EPITHELIAL_CELL_DIFFERENTIATION	10		Rejected!
TISSUE_DEVELOPMENT	138	42
CARBOHYDRATE_TRANSPORT	19		Rejected!
RESPONSE_TO_STEROID_HORMONE_STIMULUS	11		Rejected!
MUSCLE_CELL_DIFFERENTIATION	22		Rejected!
CYTOKINE_METABOLIC_PROCESS	42		Rejected!
SUPEROXIDE_METABOLIC_PROCESS	10		Rejected!
REGULATION_OF_G_PROTEIN_COUPLED_RECEPTOR_PROTEIN_SIGNALING_PATHWAY	23		Rejected!
REGULATION_OF_TRANSLATION	93	34
AMINO_ACID_METABOLIC_PROCESS	78	24
PHOTORECEPTOR_CELL_MAINTENANCE	10		Rejected!
RESPONSE_TO_XENOBIOTIC_STIMULUS	12		Rejected!
INTERLEUKIN_8_BIOSYNTHETIC_PROCESS	10		Rejected!
DEFENSE_RESPONSE	271	86
FATTY_ACID_BIOSYNTHETIC_PROCESS	14		Rejected!
CALCIUM_MEDIATED_SIGNALING	16		Rejected!
I_KAPPAB_KINASE_NF_KAPPAB_CASCADE	114	53
NUCLEOSOME_ASSEMBLY	10		Rejected!
ACTIN_FILAMENT_BASED_PROCESS	116	50
TUBE_DEVELOPMENT	18		Rejected!
CELL_CYCLE_PROCESS	193	87
FATTY_ACID_OXIDATION	18		Rejected!
PRODUCTION_OF_MOLECULAR_MEDIATOR_OF_IMMUNE_RESPONSE	13		Rejected!
SPHINGOLIPID_METABOLIC_PROCESS	29		Rejected!
NEGATIVE_REGULATION_OF_CYTOSKELETON_ORGANIZATION_AND_BIOGENESIS	11		Rejected!
INTRA_GOLGI_VESICLE_MEDIATED_TRANSPORT	12		Rejected!
BEHAVIOR	155	58
REGULATION_OF_PROTEIN_METABOLIC_PROCESS	173	66
REGULATION_OF_SIGNAL_TRANSDUCTION	223	106
MITOTIC_SISTER_CHROMATID_SEGREGATION	16		Rejected!
POSITIVE_REGULATION_OF_IMMUNE_RESPONSE	29		Rejected!
NEGATIVE_REGULATION_OF_PROTEIN_METABOLIC_PROCESS	48		Rejected!
VITAMIN_TRANSPORT	13		Rejected!
REGULATION_OF_PEPTIDYL_TYROSINE_PHOSPHORYLATION	18		Rejected!
REGULATION_OF_GENE_SPECIFIC_TRANSCRIPTION	11		Rejected!
POSITIVE_REGULATION_OF_TRANSPORT	23		Rejected!
TRANSCRIPTION_INITIATION	35	19
AMINO_ACID_DERIVATIVE_METABOLIC_PROCESS	24		Rejected!
PHAGOCYTOSIS	17		Rejected!
NEGATIVE_REGULATION_OF_CELLULAR_PROCESS	646	282
PROTEOGLYCAN_BIOSYNTHETIC_PROCESS	15		Rejected!
REGULATION_OF_DNA_METABOLIC_PROCESS	45	18
LOCOMOTORY_BEHAVIOR	97	41
RNA_ELONGATION	10		Rejected!
REGULATION_OF_CELL_ADHESION	37		Rejected!
T_CELL_DIFFERENTIATION	15		Rejected!
REGULATION_OF_DEVELOPMENTAL_PROCESS	442	172
RESPONSE_TO_HEAT	10		Rejected!
ACTIVATION_OF_MAPK_ACTIVITY	41	16
GENERATION_OF_PRECURSOR_METABOLITES_AND_ENERGY	123	42
DEPHOSPHORYLATION	70	30
MEMBRANE_LIPID_BIOSYNTHETIC_PROCESS	49	17
PROTEIN_DNA_COMPLEX_ASSEMBLY	49	26
CALCIUM_ION_TRANSPORT	27		Rejected!
REGULATION_OF_T_CELL_ACTIVATION	28		Rejected!
CELLULAR_MORPHOGENESIS_DURING_DIFFERENTIATION	49	18
REGULATION_OF_BODY_FLUID_LEVELS	57	21
COENZYME_BIOSYNTHETIC_PROCESS	10		Rejected!
NEGATIVE_REGULATION_OF_GROWTH	40	19
EPITHELIAL_TO_MESENCHYMAL_TRANSITION	10		Rejected!
GENERATION_OF_NEURONS	83	32
N_ACETYLGLUCOSAMINE_METABOLIC_PROCESS	12		Rejected!
RESPONSE_TO_CARBOHYDRATE_STIMULUS	12		Rejected!
MEIOTIC_CELL_CYCLE	35		Rejected!
RNA_BIOSYNTHETIC_PROCESS	639	331
DETECTION_OF_STIMULUS	47		Rejected!
SPERM_MOTILITY	11		Rejected!
CYTOKINE_PRODUCTION	73	25
CELLULAR_PROTEIN_COMPLEX_ASSEMBLY	33		Rejected!
CELLULAR_CATABOLIC_PROCESS	212	66
MITOTIC_CELL_CYCLE	153	72
REGULATION_OF_PHOSPHORYLATION	49	22
LIPOPROTEIN_METABOLIC_PROCESS	33		Rejected!
MESODERM_DEVELOPMENT	22		Rejected!
LIPID_METABOLIC_PROCESS	325	103
CELLULAR_BIOSYNTHETIC_PROCESS	321	104
ORGANIC_ACID_METABOLIC_PROCESS	180	62
POSITIVE_REGULATION_OF_MULTICELLULAR_ORGANISMAL_PROCESS	66	26
ACTIVATION_OF_NF_KAPPAB_TRANSCRIPTION_FACTOR	18		Rejected!
BLOOD_COAGULATION	43	19
REGULATION_OF_CELLULAR_COMPONENT_ORGANIZATION_AND_BIOGENESIS	126	56
PURINE_RIBONUCLEOTIDE_METABOLIC_PROCESS	10		Rejected!
COFACTOR_CATABOLIC_PROCESS	10		Rejected!
RAS_PROTEIN_SIGNAL_TRANSDUCTION	67	28
MYELOID_CELL_DIFFERENTIATION	37	15
CELL_CYCLE_PHASE	170	75
LEUKOCYTE_DIFFERENTIATION	38		Rejected!
JNK_CASCADE	47		Rejected!
POSITIVE_REGULATION_OF_I_KAPPAB_KINASE_NF_KAPPAB_CASCADE	87	41
CELLULAR_PROTEIN_COMPLEX_DISASSEMBLY	13		Rejected!
REGULATION_OF_RAS_PROTEIN_SIGNAL_TRANSDUCTION	20		Rejected!
RHYTHMIC_PROCESS	29		Rejected!
NITROGEN_COMPOUND_METABOLIC_PROCESS	155	49
VIRAL_REPRODUCTION	41	19
MONOCARBOXYLIC_ACID_METABOLIC_PROCESS	88	33
REGULATION_OF_ACTIN_FILAMENT_LENGTH	13		Rejected!
LEUKOCYTE_CHEMOTAXIS	13		Rejected!
REGULATION_OF_NUCLEOCYTOPLASMIC_TRANSPORT	22		Rejected!
MULTICELLULAR_ORGANISMAL_DEVELOPMENT	1051	408
BRAIN_DEVELOPMENT	51	22
ANATOMICAL_STRUCTURE_FORMATION	56	24
IMMUNE_EFFECTOR_PROCESS	38		Rejected!
RESPONSE_TO_NUTRIENT_LEVELS	29		Rejected!
CELL_CELL_SIGNALING	405	148
LIPID_BIOSYNTHETIC_PROCESS	97	34
ORGAN_MORPHOGENESIS	145	61
DETECTION_OF_CHEMICAL_STIMULUS	18		Rejected!
POSITIVE_REGULATION_OF_HYDROLASE_ACTIVITY	55	23
S_PHASE	14		Rejected!
POSITIVE_REGULATION_OF_MAP_KINASE_ACTIVITY	47	20
AMINO_ACID_CATABOLIC_PROCESS	25		Rejected!
CELL_CYCLE_CHECKPOINT_GO_0000075	48	15
MITOCHONDRIAL_MEMBRANE_ORGANIZATION_AND_BIOGENESIS	11		Rejected!
POSITIVE_REGULATION_OF_CASPASE_ACTIVITY	30		Rejected!
REGULATION_OF_TRANSCRIPTION_FROM_RNA_POLYMERASE_II_PROMOTER	289	164
POSITIVE_REGULATION_OF_T_CELL_PROLIFERATION	13		Rejected!
POSITIVE_REGULATION_OF_CELLULAR_PROTEIN_METABOLIC_PROCESS	73	27
CELLULAR_CARBOHYDRATE_METABOLIC_PROCESS	126	41
REGULATION_OF_TRANSCRIPTION_FACTOR_ACTIVITY	40	18
CELL_RECOGNITION	19		Rejected!
PROTEOGLYCAN_METABOLIC_PROCESS	21		Rejected!
DNA_REPLICATION_INITIATION	16		Rejected!
PEPTIDE_METABOLIC_PROCESS	10		Rejected!
REGULATION_OF_MYELOID_CELL_DIFFERENTIATION	19		Rejected!
DEFENSE_RESPONSE_TO_VIRUS	12		Rejected!
REGULATION_OF_PH	13		Rejected!
CELL_SUBSTRATE_ADHESION	39	17
MYELOID_LEUKOCYTE_DIFFERENTIATION	15		Rejected!
CHROMOSOME_SEGREGATION	32	15
REGULATION_OF_CHROMOSOME_ORGANIZATION_AND_BIOGENESIS	10		Rejected!
ANION_TRANSPORT	31		Rejected!
PROTEIN_POLYMERIZATION	19		Rejected!
LEUKOCYTE_ACTIVATION	69	21
INTERLEUKIN_1_SECRETION	10		Rejected!
ALCOHOL_METABOLIC_PROCESS	88	29
FEEDING_BEHAVIOR	24		Rejected!
TRNA_METABOLIC_PROCESS	19		Rejected!
ELECTRON_TRANSPORT_GO_0006118	51	16
ADAPTIVE_IMMUNE_RESPONSE_GO_0002460	24		Rejected!
INTERLEUKIN_2_PRODUCTION	11		Rejected!
POSITIVE_REGULATION_OF_DEFENSE_RESPONSE	10		Rejected!
B_CELL_DIFFERENTIATION	12		Rejected!
REGULATION_OF_HOMEOSTATIC_PROCESS	14		Rejected!
METAL_ION_TRANSPORT	117	44
ENDOTHELIAL_CELL_PROLIFERATION	12		Rejected!
NEUROPEPTIDE_SIGNALING_PATHWAY	14		Rejected!
ACTIN_POLYMERIZATION_AND_OR_DEPOLYMERIZATION	23		Rejected!
INFLAMMATORY_RESPONSE	130	43
NEGATIVE_REGULATION_OF_INTRACELLULAR_TRANSPORT	11		Rejected!
PROTEIN_EXPORT_FROM_NUCLEUS	12		Rejected!
PROTEIN_STABILIZATION	11		Rejected!
ACTIVATION_OF_IMMUNE_RESPONSE	17		Rejected!
RESPONSE_TO_STRESS	509	184
RIBONUCLEOPROTEIN_COMPLEX_BIOGENESIS_AND_ASSEMBLY	86	40
CELLULAR_CATION_HOMEOSTASIS	106	46
REGULATION_OF_CELLULAR_METABOLIC_PROCESS	787	400
PROTEIN_COMPLEX_DISASSEMBLY	14		Rejected!
MITOCHONDRION_ORGANIZATION_AND_BIOGENESIS	48		Rejected!
CIRCADIAN_RHYTHM	14		Rejected!
RNA_PROCESSING	174	75
B_CELL_ACTIVATION	20		Rejected!
EXTRACELLULAR_STRUCTURE_ORGANIZATION_AND_BIOGENESIS	32		Rejected!
INTERLEUKIN_8_PRODUCTION	12		Rejected!
DNA_CATABOLIC_PROCESS	23		Rejected!
RESPONSE_TO_CHEMICAL_STIMULUS	315	112
PROTEIN_IMPORT_INTO_NUCLEUS	48	22
REGULATION_OF_NEUROTRANSMITTER_LEVELS	24		Rejected!
REGULATION_OF_GENE_EXPRESSION	673	352
REGULATION_OF_CELL_DIFFERENTIATION	60	32
SENSORY_PERCEPTION	190	64
NEGATIVE_REGULATION_OF_DNA_BINDING	17		Rejected!
POSITIVE_REGULATION_OF_DEVELOPMENTAL_PROCESS	218	81
PROTEIN_RNA_COMPLEX_ASSEMBLY	67	33
POST_TRANSLATIONAL_PROTEIN_MODIFICATION	477	221
VACUOLE_ORGANIZATION_AND_BIOGENESIS	12		Rejected!
POSITIVE_REGULATION_OF_CYTOKINE_SECRETION	10		Rejected!
ESTABLISHMENT_OF_ORGANELLE_LOCALIZATION	18		Rejected!
VACUOLAR_TRANSPORT	13		Rejected!
CALCIUM_INDEPENDENT_CELL_CELL_ADHESION	22		Rejected!
PHOSPHOINOSITIDE_MEDIATED_SIGNALING	48	18
PROTEIN_TARGETING_TO_MEMBRANE	12		Rejected!
NUCLEAR_EXPORT	34		Rejected!
REGULATION_OF_ORGANELLE_ORGANIZATION_AND_BIOGENESIS	40	20
MORPHOGENESIS_OF_AN_EPITHELIUM	16		Rejected!
NEUTRAL_AMINO_ACID_TRANSPORT	10		Rejected!
AMINE_CATABOLIC_PROCESS	27		Rejected!
CELLULAR_MONOVALENT_INORGANIC_CATION_HOMEOSTASIS	11		Rejected!
RESPONSE_TO_BACTERIUM	31		Rejected!
CELLULAR_COMPONENT_ASSEMBLY	298	140
IMMUNE_RESPONSE	237	81
HEMOPOIETIC_OR_LYMPHOID_ORGAN_DEVELOPMENT	77	26
REGULATION_OF_JNK_CASCADE	12		Rejected!
PROTEIN_MODIFICATION_BY_SMALL_PROTEIN_CONJUGATION	43	27
REGULATION_OF_CATABOLIC_PROCESS	16		Rejected!
BIOPOLYMER_BIOSYNTHETIC_PROCESS	14		Rejected!
GROWTH	77	29
EXCRETION	36		Rejected!
ANGIOGENESIS	48	21
NEGATIVE_REGULATION_OF_PHOSPHORYLATION	12		Rejected!
POSITIVE_REGULATION_OF_TRANSCRIPTION_FACTOR_ACTIVITY	24		Rejected!
PROTEIN_UBIQUITINATION	40	26
CARBOXYLIC_ACID_TRANSPORT	41		Rejected!
NEGATIVE_REGULATION_OF_CELLULAR_COMPONENT_ORGANIZATION_AND_BIOGENESIS	29		Rejected!
DEVELOPMENT_OF_PRIMARY_SEXUAL_CHARACTERISTICS	26		Rejected!
PROTEIN_CATABOLIC_PROCESS	69	35
AGING	13		Rejected!
NEGATIVE_REGULATION_OF_CELL_ADHESION	18		Rejected!
EMBRYO_IMPLANTATION	14		Rejected!
PROTEOLYSIS	191	72
SECONDARY_METABOLIC_PROCESS	26		Rejected!
PYRIMIDINE_NUCLEOTIDE_METABOLIC_PROCESS	10		Rejected!
VITAMIN_METABOLIC_PROCESS	17		Rejected!
MEMBRANE_ORGANIZATION_AND_BIOGENESIS	135	62
MAINTENANCE_OF_LOCALIZATION	22		Rejected!
REGULATION_OF_ANGIOGENESIS	26		Rejected!
INTERCELLULAR_JUNCTION_ASSEMBLY_AND_MAINTENANCE	13		Rejected!
ENERGY_DERIVATION_BY_OXIDATION_OF_ORGANIC_COMPOUNDS	37	15
SYNAPTIC_TRANSMISSION	174	65
ACTIN_FILAMENT_POLYMERIZATION	14		Rejected!
ACTIN_CYTOSKELETON_ORGANIZATION_AND_BIOGENESIS	106	47
RESPONSE_TO_OXIDATIVE_STRESS	46		Rejected!
POSITIVE_REGULATION_OF_METABOLIC_PROCESS	236	119
KERATINOCYTE_DIFFERENTIATION	15		Rejected!
AMINO_ACID_AND_DERIVATIVE_METABOLIC_PROCESS	101	34
SYNAPSE_ORGANIZATION_AND_BIOGENESIS	23		Rejected!
BILE_ACID_METABOLIC_PROCESS	11		Rejected!
REGULATION_OF_CYTOKINE_PRODUCTION	25		Rejected!
RESPONSE_TO_TEMPERATURE_STIMULUS	16		Rejected!
REGULATION_OF_ACTIN_POLYMERIZATION_AND_OR_DEPOLYMERIZATION	12		Rejected!
OLIGOSACCHARIDE_METABOLIC_PROCESS	11		Rejected!
REGULATION_OF_HEART_CONTRACTION	25		Rejected!
COVALENT_CHROMATIN_MODIFICATION	25		Rejected!
REGULATION_OF_ACTION_POTENTIAL	17		Rejected!
CELLULAR_PROTEIN_METABOLIC_PROCESS	1118	445
LIPID_HOMEOSTASIS	16		Rejected!
RRNA_PROCESSING	15		Rejected!
XENOBIOTIC_METABOLIC_PROCESS	11		Rejected!
ESTABLISHMENT_OF_VESICLE_LOCALIZATION	10		Rejected!
HEME_BIOSYNTHETIC_PROCESS	10		Rejected!
UNFOLDED_PROTEIN_RESPONSE	10		Rejected!
CELL_DIVISION	21		Rejected!
RESPONSE_TO_ABIOTIC_STIMULUS	89	35
HOMEOSTASIS_OF_NUMBER_OF_CELLS	20		Rejected!
REGULATED_SECRETORY_PATHWAY	15		Rejected!
RNA_3__END_PROCESSING	10		Rejected!
RESPONSE_TO_BIOTIC_STIMULUS	120	40
G_PROTEIN_SIGNALING__COUPLED_TO_CAMP_NUCLEOTIDE_SECOND_MESSENGER	64	30
PROTEIN_SECRETION	33		Rejected!
PROTEIN_KINASE_CASCADE	293	127
PROTEIN_AMINO_ACID_LIPIDATION	24		Rejected!
NEGATIVE_REGULATION_OF_CELL_DIFFERENTIATION	28	17
MACROMOLECULE_LOCALIZATION	237	94
SENSORY_PERCEPTION_OF_CHEMICAL_STIMULUS	20		Rejected!
CELLULAR_RESPONSE_TO_STIMULUS	19		Rejected!
MICROTUBULE_ORGANIZING_CENTER_ORGANIZATION_AND_BIOGENESIS	16		Rejected!
G1_PHASE_OF_MITOTIC_CELL_CYCLE	13		Rejected!
GLYCOSPHINGOLIPID_METABOLIC_PROCESS	12		Rejected!
REGULATION_OF_TRANSCRIPTION__DNA_DEPENDENT	461	256
INTERACTION_WITH_HOST	17		Rejected!
REGULATION_OF_RHO_GTPASE_ACTIVITY	11		Rejected!
MRNA_PROCESSING_GO_0006397	74	40
MACROMOLECULE_BIOSYNTHETIC_PROCESS	321	110
G_PROTEIN_SIGNALING__ADENYLATE_CYCLASE_ACTIVATING_PATHWAY	25		Rejected!
RESPONSE_TO_OTHER_ORGANISM	83	26
RNA_EXPORT_FROM_NUCLEUS	21		Rejected!
LYSOSOMAL_TRANSPORT	10		Rejected!
MACROMOLECULE_CATABOLIC_PROCESS	137	53
AMINE_BIOSYNTHETIC_PROCESS	15		Rejected!
POSITIVE_REGULATION_OF_T_CELL_ACTIVATION	21		Rejected!
NEUROLOGICAL_SYSTEM_PROCESS	379	136
REGULATION_OF_CELL_SHAPE	14		Rejected!
EPIDERMAL_GROWTH_FACTOR_RECEPTOR_SIGNALING_PATHWAY	22	15
AMINO_ACID_DERIVATIVE_BIOSYNTHETIC_PROCESS	10		Rejected!
STEROID_HORMONE_RECEPTOR_SIGNALING_PATHWAY	20		Rejected!
CELLULAR_RESPONSE_TO_EXTRACELLULAR_STIMULUS	12		Rejected!
POSITIVE_REGULATION_OF_PROTEIN_SECRETION	12		Rejected!
REGULATION_OF_MITOTIC_CELL_CYCLE	23		Rejected!
RIBONUCLEOTIDE_METABOLIC_PROCESS	16		Rejected!
BIOPOLYMER_MODIFICATION	651	297
TRANSPORT	796	303
CELLULAR_LIPID_CATABOLIC_PROCESS	35		Rejected!
EPIDERMIS_DEVELOPMENT	71		Rejected!
REGULATION_OF_RESPONSE_TO_STIMULUS	59	21
REGULATION_OF_MAP_KINASE_ACTIVITY	67	28
NEGATIVE_REGULATION_OF_TRANSCRIPTION	188	108
HOMEOSTATIC_PROCESS	207	82
SODIUM_ION_TRANSPORT	22		Rejected!
POSITIVE_REGULATION_OF_DNA_METABOLIC_PROCESS	11		Rejected!
VASCULATURE_DEVELOPMENT	55	23
CELLULAR_HOMEOSTASIS	147	59
STRIATED_MUSCLE_CONTRACTION_GO_0006941	14		Rejected!
GLYCOPROTEIN_BIOSYNTHETIC_PROCESS	74	34
ICOSANOID_METABOLIC_PROCESS	17		Rejected!
PHOSPHOINOSITIDE_BIOSYNTHETIC_PROCESS	24		Rejected!
SECRETION	179	66
DNA_REPLICATION	102	38
APOPTOTIC_MITOCHONDRIAL_CHANGES	11		Rejected!
POSITIVE_REGULATION_OF_CELLULAR_COMPONENT_ORGANIZATION_AND_BIOGENESIS	36	15
GENERATION_OF_A_SIGNAL_INVOLVED_IN_CELL_CELL_SIGNALING	29		Rejected!
CELL_CELL_ADHESION	86	34
NEGATIVE_REGULATION_OF_CELL_PROLIFERATION	156	67
POSITIVE_REGULATION_OF_LYMPHOCYTE_ACTIVATION	24		Rejected!
DNA_DAMAGE_RESPONSE__SIGNAL_TRANSDUCTION	35		Rejected!
EMBRYONIC_MORPHOGENESIS	17		Rejected!
NLS_BEARING_SUBSTRATE_IMPORT_INTO_NUCLEUS	13		Rejected!
DIGESTION	44		Rejected!
COFACTOR_TRANSPORT	11		Rejected!
NEGATIVE_REGULATION_OF_TRANSCRIPTION_FROM_RNA_POLYMERASE_II_PROMOTER	84	44
REGULATION_OF_CATALYTIC_ACTIVITY	277	114
NUCLEOTIDE_BIOSYNTHETIC_PROCESS	20		Rejected!
GLIOGENESIS	11		Rejected!
NUCLEOTIDE_SUGAR_METABOLIC_PROCESS	10		Rejected!
LIPOPROTEIN_BIOSYNTHETIC_PROCESS	26		Rejected!
DNA_DAMAGE_RESPONSE__SIGNAL_TRANSDUCTION_RESULTING_IN_INDUCTION_OF_APOPTOSIS	15		Rejected!
VESICLE_LOCALIZATION	11		Rejected!
ADAPTIVE_IMMUNE_RESPONSE	25		Rejected!
ANTI_APOPTOSIS	118	47
MAINTENANCE_OF_CELLULAR_PROTEIN_LOCALIZATION	11		Rejected!
INTRACELLULAR_RECEPTOR_MEDIATED_SIGNALING_PATHWAY	21		Rejected!
NEGATIVE_REGULATION_OF_MAP_KINASE_ACTIVITY	17		Rejected!
DNA_DAMAGE_CHECKPOINT	20		Rejected!
REGULATION_OF_CYCLIN_DEPENDENT_PROTEIN_KINASE_ACTIVITY	43	20
GOLGI_VESICLE_TRANSPORT	48	19
PEPTIDYL_TYROSINE_PHOSPHORYLATION	27		Rejected!
NEGATIVE_REGULATION_OF_SECRETION	13		Rejected!
PROTEIN_PROCESSING	49	23
OXYGEN_AND_REACTIVE_OXYGEN_SPECIES_METABOLIC_PROCESS	20		Rejected!
PROTEIN_COMPLEX_ASSEMBLY	167	78
CELLULAR_LIPID_METABOLIC_PROCESS	255	82
REGULATION_OF_CELL_MORPHOGENESIS	15		Rejected!
DEFENSE_RESPONSE_TO_BACTERIUM	25		Rejected!
VESICLE_MEDIATED_TRANSPORT	194	82
DOUBLE_STRAND_BREAK_REPAIR	23		Rejected!
PROTEIN_METABOLIC_PROCESS	1232	498
NEGATIVE_REGULATION_OF_CYTOKINE_BIOSYNTHETIC_PROCESS	12		Rejected!
GLYCEROPHOSPHOLIPID_METABOLIC_PROCESS	46		Rejected!
CELLULAR_MACROMOLECULE_CATABOLIC_PROCESS	104	43
MRNA_SPLICE_SITE_SELECTION	13		Rejected!
EXOCYTOSIS	25		Rejected!
SECOND_MESSENGER_MEDIATED_SIGNALING	153	57
G_PROTEIN_SIGNALING__COUPLED_TO_CYCLIC_NUCLEOTIDE_SECOND_MESSENGER	100	38
REGULATION_OF_GENE_EXPRESSION__EPIGENETIC	30		Rejected!
REGULATION_OF_INTRACELLULAR_TRANSPORT	25		Rejected!
SMOOTH_MUSCLE_CONTRACTION_GO_0006939	12		Rejected!
SKELETAL_MUSCLE_DEVELOPMENT	31		Rejected!
ENDOSOME_TRANSPORT	23	16
PROTEIN_AMINO_ACID_ADP_RIBOSYLATION	10		Rejected!
BONE_REMODELING	29		Rejected!
REGULATION_OF_CELLULAR_COMPONENT_SIZE	14		Rejected!
PEPTIDYL_AMINO_ACID_MODIFICATION	63	26
EMBRYONIC_DEVELOPMENT	58	29
POSITIVE_REGULATION_OF_CYTOSKELETON_ORGANIZATION_AND_BIOGENESIS	10		Rejected!
PROTEIN_AMINO_ACID_O_LINKED_GLYCOSYLATION	18		Rejected!
REGULATION_OF_SMALL_GTPASE_MEDIATED_SIGNAL_TRANSDUCTION	24		Rejected!
CELL_PROLIFERATION_GO_0008283	514	199
REGULATION_OF_BLOOD_PRESSURE	22		Rejected!
ESTABLISHMENT_AND_OR_MAINTENANCE_OF_CELL_POLARITY	19		Rejected!
NUCLEOTIDE_EXCISION_REPAIR	20		Rejected!
NEGATIVE_REGULATION_OF_RNA_METABOLIC_PROCESS	132	70
NEGATIVE_REGULATION_OF_DNA_REPLICATION	13		Rejected!
REGULATION_OF_ENDOCYTOSIS	16		Rejected!
IMMUNE_SYSTEM_PROCESS	334	113
TRANSFORMING_GROWTH_FACTOR_BETA_RECEPTOR_SIGNALING_PATHWAY	36	18
ANATOMICAL_STRUCTURE_DEVELOPMENT	1017	395
REGULATION_OF_T_CELL_PROLIFERATION	16		Rejected!
RNA_SPLICING__VIA_TRANSESTERIFICATION_REACTIONS	36	18
DNA_RECOMBINATION	47	18
CELL_MATRIX_ADHESION	38	17
PEPTIDYL_TYROSINE_MODIFICATION	29		Rejected!
T_CELL_ACTIVATION	44		Rejected!
G1_PHASE	15		Rejected!
CYTOKINE_BIOSYNTHETIC_PROCESS	41		Rejected!
POSITIVE_REGULATION_OF_EPITHELIAL_CELL_PROLIFERATION	10		Rejected!
ER_TO_GOLGI_VESICLE_MEDIATED_TRANSPORT	18		Rejected!
HISTONE_MODIFICATION	24		Rejected!
TRANSCRIPTION	754	389
POSITIVE_REGULATION_OF_CELLULAR_METABOLIC_PROCESS	229	116
LEARNING_AND_OR_MEMORY	14		Rejected!
S_PHASE_OF_MITOTIC_CELL_CYCLE	10		Rejected!
POSITIVE_REGULATION_OF_BIOLOGICAL_PROCESS	710	298
RESPONSE_TO_EXTERNAL_STIMULUS	313	115
MITOTIC_SPINDLE_ORGANIZATION_AND_BIOGENESIS	10		Rejected!
AMINE_METABOLIC_PROCESS	141	47
INACTIVATION_OF_MAPK_ACTIVITY	14		Rejected!
CERAMIDE_METABOLIC_PROCESS	11		Rejected!
WOUND_HEALING	54	23
REGULATION_OF_NEUROGENESIS	14		Rejected!
TRANSCRIPTION_INITIATION_FROM_RNA_POLYMERASE_II_PROMOTER	29	18
CARBOHYDRATE_METABOLIC_PROCESS	180	62
COAGULATION	44	19
BODY_FLUID_SECRETION	10		Rejected!
MACROMOLECULAR_COMPLEX_DISASSEMBLY	15		Rejected!
RESPONSE_TO_UV	26		Rejected!
RESPIRATORY_GASEOUS_EXCHANGE	15		Rejected!
NEGATIVE_REGULATION_OF_BINDING	18		Rejected!
NEGATIVE_REGULATION_OF_METABOLIC_PROCESS	262	129
PHOSPHOLIPID_METABOLIC_PROCESS	74	24
RESPONSE_TO_IONIZING_RADIATION	10		Rejected!
POSITIVE_REGULATION_OF_JNK_ACTIVITY	18		Rejected!
REGULATION_OF_JAK_STAT_CASCADE	12		Rejected!
TRANSITION_METAL_ION_TRANSPORT	12		Rejected!
NEUROGENESIS	93	35
RESPONSE_TO_RADIATION	60	24
REGULATION_OF_CELL_CELL_ADHESION	10		Rejected!
POSITIVE_REGULATION_OF_CELL_MIGRATION	10		Rejected!
GLAND_DEVELOPMENT	13		Rejected!
REGULATION_OF_CYTOSKELETON_ORGANIZATION_AND_BIOGENESIS	30		Rejected!
CHEMICAL_HOMEOSTASIS	155	58
REGULATION_OF_METABOLIC_PROCESS	799	402
OVULATION_CYCLE	14		Rejected!
MEIOTIC_RECOMBINATION	17		Rejected!
PROTEIN_HOMOOLIGOMERIZATION	22		Rejected!
CYTOKINE_AND_CHEMOKINE_MEDIATED_SIGNALING_PATHWAY	23		Rejected!
HEART_DEVELOPMENT	37		Rejected!
CELLULAR_LOCALIZATION	373	150
DEVELOPMENTAL_GROWTH	11		Rejected!
POSITIVE_REGULATION_OF_CELL_ADHESION	13		Rejected!
POSITIVE_REGULATION_OF_TRANSFERASE_ACTIVITY	86	34
SPHINGOID_METABOLIC_PROCESS	12		Rejected!
MAPKKK_CASCADE_GO_0000165	104	37
CELL_CYCLE_ARREST_GO_0007050	57	27
ANDROGEN_RECEPTOR_SIGNALING_PATHWAY	12		Rejected!
MITOSIS	82	31
PIGMENT_BIOSYNTHETIC_PROCESS	17		Rejected!
PIGMENT_METABOLIC_PROCESS	18		Rejected!
REGULATION_OF_JNK_ACTIVITY	20		Rejected!
CELL_CYCLE_GO_0007049	315	129
ER_NUCLEAR_SIGNALING_PATHWAY	16		Rejected!
ION_HOMEOSTASIS	129	49
DNA_MODIFICATION	11		Rejected!
REGULATION_OF_TRANSPORT	67	24
RECEPTOR_MEDIATED_ENDOCYTOSIS	33		Rejected!
POSITIVE_REGULATION_OF_ANGIOGENESIS	10		Rejected!
NOTCH_SIGNALING_PATHWAY	12		Rejected!
CATION_TRANSPORT	147	54
NEURON_DIFFERENTIATION	76	29
REGULATION_OF_LYMPHOCYTE_ACTIVATION	35		Rejected!
ENDOTHELIAL_CELL_MIGRATION	11		Rejected!
NEURON_DEVELOPMENT	61	21
ACTIN_FILAMENT_BUNDLE_FORMATION	13		Rejected!
REGULATION_OF_NUCLEOBASE__NUCLEOSIDE__NUCLEOTIDE_AND_NUCLEIC_ACID_METABOLIC_PROCESS	618	334
AROMATIC_COMPOUND_METABOLIC_PROCESS	27		Rejected!
NEGATIVE_REGULATION_OF_TRANSLATION	23		Rejected!
PERIPHERAL_NERVOUS_SYSTEM_DEVELOPMENT	12		Rejected!
REGULATION_OF_GTPASE_ACTIVITY	16		Rejected!
SISTER_CHROMATID_SEGREGATION	17		Rejected!
FATTY_ACID_METABOLIC_PROCESS	63	25
NEUROTRANSMITTER_SECRETION	13		Rejected!
TRICARBOXYLIC_ACID_CYCLE_INTERMEDIATE_METABOLIC_PROCESS	11		Rejected!
NEGATIVE_REGULATION_OF_MYELOID_CELL_DIFFERENTIATION	10		Rejected!
CENTROSOME_CYCLE	11		Rejected!
POLYSACCHARIDE_METABOLIC_PROCESS	18		Rejected!
ORGANELLE_LOCALIZATION	25		Rejected!
ACTIN_FILAMENT_BASED_MOVEMENT	10		Rejected!
NEGATIVE_REGULATION_OF_TRANSCRIPTION_FACTOR_ACTIVITY	15		Rejected!
HETEROCYCLE_METABOLIC_PROCESS	27		Rejected!
RIBOSOME_BIOGENESIS_AND_ASSEMBLY	18		Rejected!
ACUTE_INFLAMMATORY_RESPONSE	11		Rejected!
TRIACYLGLYCEROL_METABOLIC_PROCESS	10		Rejected!
PHOSPHOINOSITIDE_METABOLIC_PROCESS	31		Rejected!
POSITIVE_REGULATION_OF_PROTEIN_METABOLIC_PROCESS	75	27
CYTOSKELETON_ORGANIZATION_AND_BIOGENESIS	209	86
CDC42_PROTEIN_SIGNAL_TRANSDUCTION	13		Rejected!
RESPONSE_TO_HORMONE_STIMULUS	33	17
MRNA_METABOLIC_PROCESS	85	43
PROTEIN_MODIFICATION_PROCESS	632	288
PROTEIN_AMINO_ACID_PHOSPHORYLATION	280	130
NEGATIVE_REGULATION_OF_TRANSFERASE_ACTIVITY	35		Rejected!
AMYLOID_PRECURSOR_PROTEIN_METABOLIC_PROCESS	10		Rejected!
MEMBRANE_FUSION	28	15
NITROGEN_COMPOUND_BIOSYNTHETIC_PROCESS	26		Rejected!
APOPTOTIC_PROGRAM	60	20
INNATE_IMMUNE_RESPONSE	23		Rejected!
POSITIVE_REGULATION_OF_CELL_CYCLE	16		Rejected!
NEGATIVE_REGULATION_OF_SIGNAL_TRANSDUCTION	37	15
CHROMOSOME_ORGANIZATION_AND_BIOGENESIS	124	52
CELL_PROJECTION_BIOGENESIS	26		Rejected!
REGULATION_OF_NEURON_APOPTOSIS	12		Rejected!
RNA_SPLICING	92	38
COFACTOR_BIOSYNTHETIC_PROCESS	21		Rejected!
LYMPHOCYTE_ACTIVATION	61	19
POSITIVE_REGULATION_OF_PROTEIN_MODIFICATION_PROCESS	29		Rejected!
REGULATION_OF_RNA_METABOLIC_PROCESS	471	260
CATION_HOMEOSTASIS	109	47
CHROMATIN_MODIFICATION	55	23
RESPONSE_TO_WOUNDING	191	70
DETECTION_OF_BIOTIC_STIMULUS	10		Rejected!
TRANSCRIPTION_FROM_RNA_POLYMERASE_III_PROMOTER	19		Rejected!
NEGATIVE_REGULATION_OF_CATALYTIC_ACTIVITY	69	27
CELLULAR_MACROMOLECULE_METABOLIC_PROCESS	1132	451
TISSUE_REMODELING	30		Rejected!
NEGATIVE_REGULATION_OF_RESPONSE_TO_STIMULUS	11		Rejected!
SPHINGOLIPID_BIOSYNTHETIC_PROCESS	10		Rejected!
ESTABLISHMENT_AND_OR_MAINTENANCE_OF_CHROMATIN_ARCHITECTURE	77	32
NEGATIVE_REGULATION_OF_DEVELOPMENTAL_PROCESS	197	75
POSITIVE_REGULATION_OF_CELLULAR_PROCESS	669	287
DNA_DEPENDENT_DNA_REPLICATION	56	21
MONOVALENT_INORGANIC_CATION_TRANSPORT	94	28
TRANSCRIPTION_FROM_RNA_POLYMERASE_II_PROMOTER	458	240
TRANSMEMBRANE_RECEPTOR_PROTEIN_SERINE_THREONINE_KINASE_SIGNALING_PATHWAY	47	27
HUMORAL_IMMUNE_RESPONSE	32		Rejected!
MALE_GONAD_DEVELOPMENT	12		Rejected!
DNA_DAMAGE_RESPONSE__SIGNAL_TRANSDUCTION_BY_P53_CLASS_MEDIATOR	13		Rejected!
NUCLEOTIDE_METABOLIC_PROCESS	42	21
CELLULAR_CARBOHYDRATE_CATABOLIC_PROCESS	23		Rejected!
G_PROTEIN_COUPLED_RECEPTOR_PROTEIN_SIGNALING_PATHWAY	343	115
AMINE_TRANSPORT	38		Rejected!
INTERPHASE_OF_MITOTIC_CELL_CYCLE	62	34
PROTEIN_TRANSPORT	157	68
TRANSLATION	180	49
POSITIVE_REGULATION_OF_MAPKKK_CASCADE	11		Rejected!
CYTOSKELETON_DEPENDENT_INTRACELLULAR_TRANSPORT	26		Rejected!
POSITIVE_REGULATION_OF_DNA_BINDING	26		Rejected!
PHOSPHORYLATION	314	144
CATABOLIC_PROCESS	225	71
PROTEIN_IMPORT_INTO_NUCLEUS__TRANSLOCATION	11		Rejected!
HORMONE_METABOLIC_PROCESS	32		Rejected!
NEGATIVE_REGULATION_OF_BIOLOGICAL_PROCESS	677	290
REGULATION_OF_PROTEIN_SECRETION	22		Rejected!
POSITIVE_REGULATION_OF_SECRETION	20		Rejected!
INTERFERON_GAMMA_BIOSYNTHETIC_PROCESS	12		Rejected!
PROTEIN_LOCALIZATION	215	87
CARBOHYDRATE_CATABOLIC_PROCESS	24		Rejected!
ADENYLATE_CYCLASE_ACTIVATION	19		Rejected!
BASE_EXCISION_REPAIR	17		Rejected!
NEURON_APOPTOSIS	17		Rejected!
DNA_PACKAGING	35	16
CARBOHYDRATE_BIOSYNTHETIC_PROCESS	49	20
POTASSIUM_ION_TRANSPORT	58	17
CYTOKINE_SECRETION	18		Rejected!
REGULATION_OF_MULTICELLULAR_ORGANISMAL_PROCESS	151	50
POSITIVE_REGULATION_OF_PROTEIN_AMINO_ACID_PHOSPHORYLATION	20		Rejected!
REGULATION_OF_PROTEIN_IMPORT_INTO_NUCLEUS	16		Rejected!
INTERFERON_GAMMA_PRODUCTION	14		Rejected!
REGULATION_OF_CELLULAR_PROTEIN_METABOLIC_PROCESS	162	63
MICROTUBULE_BASED_MOVEMENT	16		Rejected!
REGULATION_OF_PROTEIN_STABILITY	19		Rejected!
REGULATION_OF_IMMUNE_SYSTEM_PROCESS	67	22
REGULATION_OF_CYTOKINE_BIOSYNTHETIC_PROCESS	38		Rejected!
REGULATION_OF_APOPTOSIS	342	126
SPINDLE_ORGANIZATION_AND_BIOGENESIS	11		Rejected!
PROTEIN_AMINO_ACID_DEPHOSPHORYLATION	63	30
NEGATIVE_REGULATION_OF_PROGRAMMED_CELL_DEATH	151	54
TRANSMEMBRANE_RECEPTOR_PROTEIN_TYROSINE_KINASE_SIGNALING_PATHWAY	83	53
DNA_FRAGMENTATION_DURING_APOPTOSIS	13		Rejected!
REGULATION_OF_PROGRAMMED_CELL_DEATH	343	127
HEME_METABOLIC_PROCESS	11		Rejected!
CELL_MIGRATION	96	42
CYCLIC_NUCLEOTIDE_MEDIATED_SIGNALING	102	39
STEROID_BIOSYNTHETIC_PROCESS	23		Rejected!
ION_TRANSPORT	185	69
RESPONSE_TO_DNA_DAMAGE_STIMULUS	162	64
ORGAN_DEVELOPMENT	572	220
TRANSMISSION_OF_NERVE_IMPULSE	189	70
GENE_SILENCING	10		Rejected!
TYROSINE_PHOSPHORYLATION_OF_STAT_PROTEIN	13		Rejected!
INTRACELLULAR_SIGNALING_CASCADE	668	272
REGULATION_OF_IMMUNE_EFFECTOR_PROCESS	15		Rejected!
REGULATION_OF_TRANSCRIPTION	566	313
NEGATIVE_REGULATION_OF_CELL_MIGRATION	15		Rejected!
MITOCHONDRIAL_TRANSPORT	21		Rejected!
STRESS_ACTIVATED_PROTEIN_KINASE_SIGNALING_PATHWAY	49	15
REGULATION_OF_CELL_CYCLE	182	77
CHROMATIN_ASSEMBLY_OR_DISASSEMBLY	26		Rejected!
CELL_MATURATION	16		Rejected!
SMALL_GTPASE_MEDIATED_SIGNAL_TRANSDUCTION	90	36
CELLULAR_DEFENSE_RESPONSE	58	22
REGULATION_OF_IMMUNE_RESPONSE	33		Rejected!
RRNA_METABOLIC_PROCESS	16		Rejected!
SYSTEM_PROCESS	563	190
ACTIVATION_OF_PROTEIN_KINASE_ACTIVITY	28		Rejected!
REGULATION_OF_RAS_GTPASE_ACTIVITY	12		Rejected!
SENSORY_ORGAN_DEVELOPMENT	14		Rejected!
POSITIVE_REGULATION_OF_TRANSCRIPTION	144	83
UBIQUITIN_CYCLE	48	29
GLUCOSAMINE_METABOLIC_PROCESS	13		Rejected!
CENTRAL_NERVOUS_SYSTEM_DEVELOPMENT	124	47
REGULATION_OF_BINDING	58	23
RNA_CATABOLIC_PROCESS	23		Rejected!
APOPTOSIS_GO	433	155
NEGATIVE_REGULATION_OF_PHOSPHATE_METABOLIC_PROCESS	13		Rejected!
NEGATIVE_REGULATION_OF_BIOSYNTHETIC_PROCESS	30		Rejected!
MAINTENANCE_OF_PROTEIN_LOCALIZATION	13		Rejected!
CELLULAR_POLYSACCHARIDE_METABOLIC_PROCESS	16		Rejected!
DETECTION_OF_EXTERNAL_STIMULUS	23		Rejected!
CELLULAR_RESPONSE_TO_NUTRIENT_LEVELS	10		Rejected!
NUCLEOCYTOPLASMIC_TRANSPORT	88	36
M_PHASE_OF_MITOTIC_CELL_CYCLE	85	32
POSITIVE_REGULATION_OF_CYTOKINE_PRODUCTION	15		Rejected!
SPERMATID_DIFFERENTIATION	11		Rejected!
RESPONSE_TO_ORGANIC_SUBSTANCE	30		Rejected!
RHO_PROTEIN_SIGNAL_TRANSDUCTION	39	15
CHROMOSOME_CONDENSATION	10		Rejected!
CELL_FATE_COMMITMENT	13		Rejected!
RESPONSE_TO_HYPOXIA	28		Rejected!
MICROTUBULE_POLYMERIZATION_OR_DEPOLYMERIZATION	11		Rejected!
REPRODUCTION	266	89
CAMP_MEDIATED_SIGNALING	65	30
REGULATION_OF_CELL_PROLIFERATION	309	124
NITROGEN_COMPOUND_CATABOLIC_PROCESS	29		Rejected!
REGULATION_OF_I_KAPPAB_KINASE_NF_KAPPAB_CASCADE	93	46
RESPONSE_TO_DRUG	22		Rejected!
POSITIVE_REGULATION_OF_PEPTIDYL_TYROSINE_PHOSPHORYLATION	13		Rejected!
ECTODERM_DEVELOPMENT	80	17
LEUKOCYTE_MIGRATION	16		Rejected!
REGULATION_OF_ENDOTHELIAL_CELL_PROLIFERATION	10		Rejected!
REGULATION_OF_MEMBRANE_POTENTIAL	15		Rejected!
REGULATION_OF_CELL_GROWTH	46	20
REGULATION_OF_VIRAL_REPRODUCTION	12		Rejected!
G1_S_TRANSITION_OF_MITOTIC_CELL_CYCLE	27	16
CASPASE_ACTIVATION	26		Rejected!
CELLULAR_RESPIRATION	19		Rejected!
INDUCTION_OF_APOPTOSIS_BY_INTRACELLULAR_SIGNALS	24		Rejected!
INTEGRIN_BINDING	30	15
CATION_TRANSMEMBRANE_TRANSPORTER_ACTIVITY	213	79
MAP_KINASE_ACTIVITY	12		Rejected!
TRANSLATION_REGULATOR_ACTIVITY	41	19
HYDROLASE_ACTIVITY__ACTING_ON_ACID_ANHYDRIDES	228	98
MRNA_BINDING	23		Rejected!
PROTEIN_PHOSPHATASE_TYPE_2A_REGULATOR_ACTIVITY	14		Rejected!
ACTIVE_TRANSMEMBRANE_TRANSPORTER_ACTIVITY	122	53
GLUTAMATE_RECEPTOR_ACTIVITY	20		Rejected!
ACID_AMINO_ACID_LIGASE_ACTIVITY	57	31
SEROTONIN_RECEPTOR_ACTIVITY	11		Rejected!
INORGANIC_ANION_TRANSMEMBRANE_TRANSPORTER_ACTIVITY	19		Rejected!
HISTONE_METHYLTRANSFERASE_ACTIVITY	11		Rejected!
PROTEIN_DOMAIN_SPECIFIC_BINDING	72	23
CARBOHYDRATE_BINDING	72	28
G_PROTEIN_COUPLED_RECEPTOR_BINDING	54	26
GTP_BINDING	46	19
HYDRO_LYASE_ACTIVITY	27		Rejected!
NUCLEOTIDE_BINDING	225	98
COPPER_ION_BINDING	15		Rejected!
DI___TRI_VALENT_INORGANIC_CATION_TRANSMEMBRANE_TRANSPORTER_ACTIVITY	22		Rejected!
TRANSMEMBRANE_RECEPTOR_PROTEIN_KINASE_ACTIVITY	51	24
SYMPORTER_ACTIVITY	31		Rejected!
TRANSFERASE_ACTIVITY__TRANSFERRING_ACYL_GROUPS	59	28
ANTIPORTER_ACTIVITY	10		Rejected!
HEMATOPOIETIN_INTERFERON_CLASS__D200_DOMAIN__CYTOKINE_RECEPTOR_BINDING	29		Rejected!
MONOSACCHARIDE_BINDING	11		Rejected!
OXIDOREDUCTASE_ACTIVITY__ACTING_ON_SULFUR_GROUP_OF_DONORS	10		Rejected!
DNA_HELICASE_ACTIVITY	25		Rejected!
ENDODEOXYRIBONUCLEASE_ACTIVITY	11		Rejected!
PROTEIN_TYROSINE_PHOSPHATASE_ACTIVITY	53	26
RAS_GTPASE_ACTIVATOR_ACTIVITY	29		Rejected!
PHOSPHORIC_MONOESTER_HYDROLASE_ACTIVITY	112	54
DAMAGED_DNA_BINDING	21		Rejected!
RNA_HELICASE_ACTIVITY	24		Rejected!
LIGASE_ACTIVITY__FORMING_CARBON_NITROGEN_BONDS	68	36
LIPID_BINDING	87	35
KINASE_BINDING	70	38
ALDO_KETO_REDUCTASE_ACTIVITY	12		Rejected!
PHOSPHOTRANSFERASE_ACTIVITY__ALCOHOL_GROUP_AS_ACCEPTOR	334	151
OXIDOREDUCTASE_ACTIVITY_GO_0016705	38		Rejected!
LIPASE_ACTIVITY	50	17
STEROID_DEHYDROGENASE_ACTIVITY	11		Rejected!
SUGAR_BINDING	34		Rejected!
INWARD_RECTIFIER_POTASSIUM_CHANNEL_ACTIVITY	12		Rejected!
RAS_GUANYL_NUCLEOTIDE_EXCHANGE_FACTOR_ACTIVITY	19		Rejected!
CATION_BINDING	213	75
PHOSPHORUS_OXYGEN_LYASE_ACTIVITY	10		Rejected!
SPECIFIC_RNA_POLYMERASE_II_TRANSCRIPTION_FACTOR_ACTIVITY	36	17
PHOSPHATE_TRANSMEMBRANE_TRANSPORTER_ACTIVITY	13		Rejected!
SULFOTRANSFERASE_ACTIVITY	28		Rejected!
PHOSPHOTRANSFERASE_ACTIVITY__PHOSPHATE_GROUP_AS_ACCEPTOR	18		Rejected!
SERINE_TYPE_PEPTIDASE_ACTIVITY	45		Rejected!
CATION_CHANNEL_ACTIVITY	119	37
SECONDARY_ACTIVE_TRANSMEMBRANE_TRANSPORTER_ACTIVITY	47	20
RAS_GTPASE_BINDING	25		Rejected!
DRUG_BINDING	16		Rejected!
ATP_DEPENDENT_HELICASE_ACTIVITY	27		Rejected!
ARYLSULFATASE_ACTIVITY	12		Rejected!
ZINC_ION_BINDING	90	33
PROTEIN_HOMODIMERIZATION_ACTIVITY	121	45
HEPARIN_BINDING	23		Rejected!
RNA_POLYMERASE_II_TRANSCRIPTION_MEDIATOR_ACTIVITY	13		Rejected!
LIGASE_ACTIVITY	97	47
CALCIUM_ION_BINDING	104	33
HYDROLASE_ACTIVITY__ACTING_ON_CARBON_NITROGEN__BUT_NOT_PEPTIDE__BONDS	46	15
CATION_TRANSPORTING_ATPASE_ACTIVITY	11		Rejected!
PROTEIN_TRANSPORTER_ACTIVITY	14		Rejected!
OXIDOREDUCTASE_ACTIVITY_GO_0016616	58		Rejected!
GTPASE_REGULATOR_ACTIVITY	126	52
METALLOPEPTIDASE_ACTIVITY	50		Rejected!
SOLUTE_SODIUM_SYMPORTER_ACTIVITY	13		Rejected!
RNA_POLYMERASE_II_TRANSCRIPTION_FACTOR_ACTIVITY	183	92
SODIUM_CHANNEL_ACTIVITY	17		Rejected!
RNA_SPLICING_FACTOR_ACTIVITY__TRANSESTERIFICATION_MECHANISM	19		Rejected!
METABOTROPIC_GLUTAMATE__GABA_B_LIKE_RECEPTOR_ACTIVITY	10		Rejected!
AMINE_RECEPTOR_ACTIVITY	34		Rejected!
STEROL_BINDING	11		Rejected!
VITAMIN_BINDING	12		Rejected!
PURINE_NUCLEOTIDE_BINDING	212	94
SH2_DOMAIN_BINDING	15		Rejected!
VOLTAGE_GATED_POTASSIUM_CHANNEL_ACTIVITY	36		Rejected!
SMALL_CONJUGATING_PROTEIN_SPECIFIC_PROTEASE_ACTIVITY	10		Rejected!
HYDROLASE_ACTIVITY__ACTING_ON_GLYCOSYL_BONDS	47		Rejected!
ANION_CATION_SYMPORTER_ACTIVITY	16		Rejected!
RECEPTOR_SIGNALING_PROTEIN_SERINE_THREONINE_KINASE_ACTIVITY	34		Rejected!
HYDROLASE_ACTIVITY__HYDROLYZING_O_GLYCOSYL_COMPOUNDS	37		Rejected!
SINGLE_STRANDED_DNA_BINDING	35		Rejected!
INTERLEUKIN_BINDING	26		Rejected!
ENZYME_ACTIVATOR_ACTIVITY	125	57
ATPASE_ACTIVITY__COUPLED_TO_TRANSMEMBRANE_MOVEMENT_OF_IONS__PHOSPHORYLATIVE_MECHANISM	20		Rejected!
EXCITATORY_EXTRACELLULAR_LIGAND_GATED_ION_CHANNEL_ACTIVITY	21		Rejected!
LYASE_ACTIVITY	69	18
TRANSFERASE_ACTIVITY__TRANSFERRING_HEXOSYL_GROUPS	81	38
MANNOSYLTRANSFERASE_ACTIVITY	10		Rejected!
SH3_DOMAIN_BINDING	15		Rejected!
OXIDOREDUCTASE_ACTIVITY__ACTING_ON_THE_CH_NH_GROUP_OF_DONORS	10		Rejected!
CARBOXY_LYASE_ACTIVITY	14		Rejected!
INOSITOL_OR_PHOSPHATIDYLINOSITOL_PHOSPHODIESTERASE_ACTIVITY	13		Rejected!
MICROTUBULE_BINDING	33		Rejected!
MICROTUBULE_MOTOR_ACTIVITY	16		Rejected!
LIPOPROTEIN_BINDING	18		Rejected!
OXIDOREDUCTASE_ACTIVITY__ACTING_ON_PEROXIDE_AS_ACCEPTOR	12		Rejected!
PHOSPHATASE_INHIBITOR_ACTIVITY	11		Rejected!
NON_MEMBRANE_SPANNING_PROTEIN_TYROSINE_KINASE_ACTIVITY	11		Rejected!
THIOLESTER_HYDROLASE_ACTIVITY	16		Rejected!
ORGANIC_ANION_TRANSMEMBRANE_TRANSPORTER_ACTIVITY	10		Rejected!
NEUROPEPTIDE_BINDING	23		Rejected!
TASTE_RECEPTOR_ACTIVITY	15		Rejected!
UDP_GLYCOSYLTRANSFERASE_ACTIVITY	42	22
PHOSPHOLIPID_BINDING	47	21
CARBONATE_DEHYDRATASE_ACTIVITY	13		Rejected!
ELECTRON_CARRIER_ACTIVITY	78	24
AMINO_ACID_TRANSMEMBRANE_TRANSPORTER_ACTIVITY	29		Rejected!
HYDROLASE_ACTIVITY__HYDROLYZING_N_GLYCOSYL_COMPOUNDS	10		Rejected!
SMALL_CONJUGATING_PROTEIN_BINDING	12		Rejected!
LIGAND_DEPENDENT_NUCLEAR_RECEPTOR_ACTIVITY	25		Rejected!
VOLTAGE_GATED_CHANNEL_ACTIVITY	73	31
HYDROLASE_ACTIVITY__ACTING_ON_ESTER_BONDS	269	113
BETA_TUBULIN_BINDING	10		Rejected!
FUCOSYLTRANSFERASE_ACTIVITY	10		Rejected!
GATED_CHANNEL_ACTIVITY	122	44
SUGAR_TRANSMEMBRANE_TRANSPORTER_ACTIVITY	11		Rejected!
PROTEASE_INHIBITOR_ACTIVITY	41		Rejected!
PROTEIN_METHYLTRANSFERASE_ACTIVITY	14		Rejected!
N_ACETYLTRANSFERASE_ACTIVITY	21		Rejected!
NEUROPEPTIDE_RECEPTOR_ACTIVITY	22		Rejected!
RIBONUCLEASE_ACTIVITY	25		Rejected!
TRANSCRIPTION_ELONGATION_REGULATOR_ACTIVITY	12		Rejected!
POLYSACCHARIDE_BINDING	36		Rejected!
CALCIUM_ION_TRANSMEMBRANE_TRANSPORTER_ACTIVITY	11		Rejected!
HORMONE_BINDING	13		Rejected!
VOLTAGE_GATED_CALCIUM_CHANNEL_ACTIVITY	18		Rejected!
IDENTICAL_PROTEIN_BINDING	305	119
TRANSFERASE_ACTIVITY__TRANSFERRING_GLYCOSYL_GROUPS	112	49
NEUTRAL_AMINO_ACID_TRANSMEMBRANE_TRANSPORTER_ACTIVITY	12		Rejected!
ANION_TRANSMEMBRANE_TRANSPORTER_ACTIVITY	59	20
SUBSTRATE_SPECIFIC_TRANSMEMBRANE_TRANSPORTER_ACTIVITY	344	125
STRUCTURAL_CONSTITUENT_OF_RIBOSOME	80		Rejected!
STEROID_DEHYDROGENASE_ACTIVITY__ACTING_ON_THE_CH_OH_GROUP_OF_DONORS__NAD_OR_NADP_AS_ACCEPTOR	10		Rejected!
PROTEIN_KINASE_ACTIVITY	285	131
MOLECULAR_ADAPTOR_ACTIVITY	49	21
ADENYL_RIBONUCLEOTIDE_BINDING	164	76
EXOPEPTIDASE_ACTIVITY	32		Rejected!
UBIQUITIN_BINDING	11		Rejected!
SUBSTRATE_SPECIFIC_CHANNEL_ACTIVITY	156	49
ADENYL_NUCLEOTIDE_BINDING	170	78
CYSTEINE_TYPE_PEPTIDASE_ACTIVITY	54	19
HISTONE_DEACETYLASE_BINDING	10		Rejected!
SMALL_GTPASE_REGULATOR_ACTIVITY	67	27
SMAD_BINDING	12		Rejected!
ANTIGEN_BINDING	28		Rejected!
COFACTOR_TRANSPORTER_ACTIVITY	10		Rejected!
S_ADENOSYLMETHIONINE_DEPENDENT_METHYLTRANSFERASE_ACTIVITY	23		Rejected!
HYDROLASE_ACTIVITY__ACTING_ON_ACID_ANHYDRIDES__CATALYZING_TRANSMEMBRANE_MOVEMENT_OF_SUBSTANCES	39	19
AMINE_TRANSMEMBRANE_TRANSPORTER_ACTIVITY	41	18
CHAPERONE_BINDING	12		Rejected!
ENZYME_REGULATOR_ACTIVITY	324	136
RNA_POLYMERASE_II_TRANSCRIPTION_FACTOR_ACTIVITY__ENHANCER_BINDING	14		Rejected!
CYTOCHROME_C_OXIDASE_ACTIVITY	13		Rejected!
MONOCARBOXYLIC_ACID_TRANSMEMBRANE_TRANSPORTER_ACTIVITY	11		Rejected!
HELICASE_ACTIVITY	51	17
OXIDOREDUCTASE_ACTIVITY	289	90
DELAYED_RECTIFIER_POTASSIUM_CHANNEL_ACTIVITY	12		Rejected!
KINASE_ACTIVITY	369	160
PHOSPHORIC_ESTER_HYDROLASE_ACTIVITY	153	74
SUBSTRATE_SPECIFIC_TRANSPORTER_ACTIVITY	392	138
SPECIFIC_TRANSCRIPTIONAL_REPRESSOR_ACTIVITY	12		Rejected!
METALLOEXOPEPTIDASE_ACTIVITY	13		Rejected!
KINASE_REGULATOR_ACTIVITY	46	31
OXIDOREDUCTASE_ACTIVITY_GO_0016706	10		Rejected!
PEPTIDE_BINDING	86	31
ADP_BINDING	11		Rejected!
NUCLEOTIDYLTRANSFERASE_ACTIVITY	47		Rejected!
CHEMOKINE_ACTIVITY	42	21
PROTEIN_N_TERMINUS_BINDING	38	15
PROTEIN_SERINE_THREONINE_KINASE_ACTIVITY	205	99
RNA_POLYMERASE_ACTIVITY	16		Rejected!
HISTONE_ACETYLTRANSFERASE_ACTIVITY	16		Rejected!
OXYGEN_BINDING	22		Rejected!
RNA_BINDING	259	111
N_METHYLTRANSFERASE_ACTIVITY	13		Rejected!
GABA_RECEPTOR_ACTIVITY	11		Rejected!
NEUROTRANSMITTER_BINDING	53	17
3__5__CYCLIC_NUCLEOTIDE_PHOSPHODIESTERASE_ACTIVITY	13		Rejected!
STEROID_HORMONE_RECEPTOR_ACTIVITY	13		Rejected!
NUCLEOSIDE_TRIPHOSPHATASE_ACTIVITY	212	92
CARBOXYPEPTIDASE_ACTIVITY	12		Rejected!
NEUROTRANSMITTER_RECEPTOR_ACTIVITY	50	15
INTRAMOLECULAR_OXIDOREDUCTASE_ACTIVITY	20		Rejected!
N_ACYLTRANSFERASE_ACTIVITY	24		Rejected!
ANION_CHANNEL_ACTIVITY	20		Rejected!
PROTEIN_KINASE_INHIBITOR_ACTIVITY	24	17
METHYLTRANSFERASE_ACTIVITY	36		Rejected!
PROTEIN_COMPLEX_BINDING	54	23
MONOSACCHARIDE_TRANSMEMBRANE_TRANSPORTER_ACTIVITY	10		Rejected!
TELOMERIC_DNA_BINDING	10		Rejected!
INSULIN_LIKE_GROWTH_FACTOR_RECEPTOR_BINDING	10		Rejected!
PROTEIN_TYROSINE_KINASE_ACTIVITY	63	28
PROTEIN_SERINE_THREONINE_PHOSPHATASE_ACTIVITY	24	16
CARBON_OXYGEN_LYASE_ACTIVITY	31		Rejected!
ACETYLGALACTOSAMINYLTRANSFERASE_ACTIVITY	12		Rejected!
SULFURIC_ESTER_HYDROLASE_ACTIVITY	16		Rejected!
TRANSCRIPTION_COACTIVATOR_ACTIVITY	123	57
ATPASE_ACTIVITY__COUPLED_TO_TRANSMEMBRANE_MOVEMENT_OF_IONS	24		Rejected!
ATP_DEPENDENT_RNA_HELICASE_ACTIVITY	17		Rejected!
ACETYLTRANSFERASE_ACTIVITY	25	15
CARBOHYDRATE_TRANSMEMBRANE_TRANSPORTER_ACTIVITY	16		Rejected!
POTASSIUM_CHANNEL_ACTIVITY	50	15
CHEMOKINE_RECEPTOR_BINDING	43	22
MONOOXYGENASE_ACTIVITY	31		Rejected!
RHODOPSIN_LIKE_RECEPTOR_ACTIVITY	135	36
KINASE_INHIBITOR_ACTIVITY	25	18
TRANSCRIPTION_COREPRESSOR_ACTIVITY	94	45
PEPTIDE_RECEPTOR_ACTIVITY	54	15
DEOXYRIBONUCLEASE_ACTIVITY	22		Rejected!
PHOSPHOINOSITIDE_BINDING	20		Rejected!
HYDROLASE_ACTIVITY__ACTING_ON_CARBON_NITROGEN__BUT_NOT_PEPTIDE__BONDS__IN_CYCLIC_AMIDINES	16		Rejected!
ATPASE_ACTIVITY__COUPLED	93	41
G_PROTEIN_COUPLED_RECEPTOR_ACTIVITY	192	57
TRANSCRIPTION_ACTIVATOR_ACTIVITY	173	87
COFACTOR_BINDING	22		Rejected!
TRANSLATION_FACTOR_ACTIVITY__NUCLEIC_ACID_BINDING	39	19
NEUROPEPTIDE_HORMONE_ACTIVITY	12		Rejected!
ENDORIBONUCLEASE_ACTIVITY	13		Rejected!
VOLTAGE_GATED_CATION_CHANNEL_ACTIVITY	66	29
DNA_POLYMERASE_ACTIVITY	18		Rejected!
ACTIN_BINDING	76	34
ION_BINDING	274	100
3__5__EXONUCLEASE_ACTIVITY	13		Rejected!
TRANSCRIPTION_REPRESSOR_ACTIVITY	152	78
TRANSFERASE_ACTIVITY__TRANSFERRING_ALKYL_OR_ARYL__OTHER_THAN_METHYL__GROUPS	30		Rejected!
COLLAGEN_BINDING	14		Rejected!
SEQUENCE_SPECIFIC_DNA_BINDING	58	30
CYCLIC_NUCLEOTIDE_PHOSPHODIESTERASE_ACTIVITY	14		Rejected!
NUCLEAR_HORMONE_RECEPTOR_BINDING	28		Rejected!
KINASE_ACTIVATOR_ACTIVITY	12		Rejected!
PROTEIN_DEACETYLASE_ACTIVITY	10		Rejected!
GUANYL_NUCLEOTIDE_BINDING	47	19
DEAMINASE_ACTIVITY	14		Rejected!
DNA_DIRECTED_DNA_POLYMERASE_ACTIVITY	14		Rejected!
ENZYME_INHIBITOR_ACTIVITY	119	46
TUBULIN_BINDING	47	20
PRIMARY_ACTIVE_TRANSMEMBRANE_TRANSPORTER_ACTIVITY	40	19
PHOSPHORIC_DIESTER_HYDROLASE_ACTIVITY	40	19
RNA_DEPENDENT_ATPASE_ACTIVITY	18		Rejected!
INOSITOL_OR_PHOSPHATIDYLINOSITOL_PHOSPHATASE_ACTIVITY	12		Rejected!
NUCLEOBASE__NUCLEOSIDE__NUCLEOTIDE_AND_NUCLEIC_ACID_TRANSMEMBRANE_TRANSPORTER_ACTIVITY	10		Rejected!
LIPID_KINASE_ACTIVITY	12		Rejected!
ENDOPEPTIDASE_ACTIVITY	117	32
MAGNESIUM_ION_BINDING	63	28
STRUCTURAL_MOLECULE_ACTIVITY	244	59
SIALYLTRANSFERASE_ACTIVITY	10		Rejected!
DOUBLE_STRANDED_RNA_BINDING	17		Rejected!
IONOTROPIC_GLUTAMATE_RECEPTOR_ACTIVITY	10		Rejected!
ACETYLGLUCOSAMINYLTRANSFERASE_ACTIVITY	16		Rejected!
RECEPTOR_BINDING	378	150
SERINE_HYDROLASE_ACTIVITY	46		Rejected!
NF_KAPPAB_BINDING	11		Rejected!
RECEPTOR_SIGNALING_PROTEIN_ACTIVITY	82	37
CARBON_CARBON_LYASE_ACTIVITY	18		Rejected!
LIGASE_ACTIVITY__FORMING_CARBON_OXYGEN_BONDS	14		Rejected!
PROTEIN_BINDING__BRIDGING	59	20
RECEPTOR_ACTIVITY	585	221
DEACETYLASE_ACTIVITY	11		Rejected!
TRANSMEMBRANE_RECEPTOR_ACTIVITY	419	146
VOLTAGE_GATED_SODIUM_CHANNEL_ACTIVITY	11		Rejected!
PROTEIN_KINASE_REGULATOR_ACTIVITY	39	26
PHOSPHOLIPASE_C_ACTIVITY	15		Rejected!
LIGAND_GATED_CHANNEL_ACTIVITY	40		Rejected!
RHO_GUANYL_NUCLEOTIDE_EXCHANGE_FACTOR_ACTIVITY	12		Rejected!
DOUBLE_STRANDED_DNA_BINDING	32	15
SMALL_GTPASE_BINDING	34		Rejected!
PATTERN_RECOGNITION_RECEPTOR_ACTIVITY	10		Rejected!
OXIDOREDUCTASE_ACTIVITY__ACTING_ON_THE_CH_CH_GROUP_OF_DONORS	23		Rejected!
ATP_DEPENDENT_DNA_HELICASE_ACTIVITY	11		Rejected!
TRANSCRIPTION_FACTOR_ACTIVITY	354	176
ENDONUCLEASE_ACTIVITY	25		Rejected!
PDZ_DOMAIN_BINDING	14		Rejected!
TRANSMEMBRANE_RECEPTOR_PROTEIN_PHOSPHATASE_ACTIVITY	19		Rejected!
EXONUCLEASE_ACTIVITY	19		Rejected!
ACTIN_FILAMENT_BINDING	25		Rejected!
CALCIUM_CHANNEL_ACTIVITY	33		Rejected!
ACETYLCHOLINE_BINDING	17		Rejected!
STRUCTURE_SPECIFIC_DNA_BINDING	56	22
CYTOSKELETAL_PROTEIN_BINDING	159	75
DNA_DEPENDENT_ATPASE_ACTIVITY	22		Rejected!
AUXILIARY_TRANSPORT_PROTEIN_ACTIVITY	26		Rejected!
POTASSIUM_CHANNEL_REGULATOR_ACTIVITY	14		Rejected!
PHOSPHOLIPASE_A2_ACTIVITY	13		Rejected!
MOTOR_ACTIVITY	28		Rejected!
NUCLEOTIDE_KINASE_ACTIVITY	13		Rejected!
AMINOPEPTIDASE_ACTIVITY	14		Rejected!
STEROID_BINDING	18		Rejected!
STEROID_HORMONE_RECEPTOR_BINDING	10		Rejected!
PHOSPHOPROTEIN_PHOSPHATASE_ACTIVITY	81	41
EXTRACELLULAR_LIGAND_GATED_ION_CHANNEL_ACTIVITY	22		Rejected!
HORMONE_ACTIVITY	44		Rejected!
SERINE_TYPE_ENDOPEPTIDASE_INHIBITOR_ACTIVITY	25		Rejected!
PROTEIN_SERINE_THREONINE_TYROSINE_KINASE_ACTIVITY	10		Rejected!
TRANSFERASE_ACTIVITY__TRANSFERRING_ONE_CARBON_GROUPS	37	15
OXIDOREDUCTASE_ACTIVITY__ACTING_ON_NADH_OR_NADPH	25		Rejected!
CARBOHYDRATE_KINASE_ACTIVITY	15		Rejected!
CHLORIDE_CHANNEL_ACTIVITY	19		Rejected!
HEMATOPOIETIN_INTERFERON_CLASS__D200_DOMAIN__CYTOKINE_RECEPTOR_ACTIVITY	34		Rejected!
CARBOXYLESTERASE_ACTIVITY	33		Rejected!
RHO_GTPASE_ACTIVATOR_ACTIVITY	19		Rejected!
STRUCTURAL_CONSTITUENT_OF_CYTOSKELETON	57	18
PATTERN_BINDING	45	16
INTERLEUKIN_RECEPTOR_ACTIVITY	21		Rejected!
TRANSCRIPTION_FACTOR_BINDING	307	144
PROTEIN_KINASE_BINDING	62	32
TRANSMEMBRANE_RECEPTOR_PROTEIN_TYROSINE_KINASE_ACTIVITY	43	17
PHOSPHOLIPASE_ACTIVITY	42	16
PROTEIN_HETERODIMERIZATION_ACTIVITY	77	39
OXIDOREDUCTASE_ACTIVITY__ACTING_ON_THE_ALDEHYDE_OR_OXO_GROUP_OF_DONORS	22		Rejected!
ATPASE_ACTIVITY	112	45
METAL_ION_TRANSMEMBRANE_TRANSPORTER_ACTIVITY	147	51
HYDROGEN_ION_TRANSMEMBRANE_TRANSPORTER_ACTIVITY	27		Rejected!
PROTEIN_C_TERMINUS_BINDING	73	33
GTPASE_ACTIVITY	99	47
INORGANIC_CATION_TRANSMEMBRANE_TRANSPORTER_ACTIVITY	58	28
TRANSFERASE_ACTIVITY__TRANSFERRING_PHOSPHORUS_CONTAINING_GROUPS	424	178
NUCLEOBASE__NUCLEOSIDE__NUCLEOTIDE_KINASE_ACTIVITY	25		Rejected!
GTPASE_ACTIVATOR_ACTIVITY	60	30
PEPTIDASE_ACTIVITY	176	53
ION_CHANNEL_ACTIVITY	149	48
SMALL_PROTEIN_CONJUGATING_ENZYME_ACTIVITY	52	26
CYSTEINE_TYPE_ENDOPEPTIDASE_ACTIVITY	40		Rejected!
PROTEIN_DIMERIZATION_ACTIVITY	182	79
CHANNEL_REGULATOR_ACTIVITY	24		Rejected!
TRANSFERASE_ACTIVITY__TRANSFERRING_PENTOSYL_GROUPS	20		Rejected!
SIGNAL_SEQUENCE_BINDING	15		Rejected!
MONOVALENT_INORGANIC_CATION_TRANSMEMBRANE_TRANSPORTER_ACTIVITY	34		Rejected!
STRUCTURAL_CONSTITUENT_OF_MUSCLE	33		Rejected!
L_AMINO_ACID_TRANSMEMBRANE_TRANSPORTER_ACTIVITY	17		Rejected!
PROTEIN_PHOSPHATASE_BINDING	10		Rejected!
OXIDOREDUCTASE_ACTIVITY__ACTING_ON_CH_OH_GROUP_OF_DONORS	64	16
COENZYME_BINDING	16		Rejected!
GTPASE_BINDING	35		Rejected!
GROWTH_FACTOR_BINDING	32	15
ENZYME_BINDING	179	82
CHROMATIN_BINDING	32		Rejected!
LIPID_TRANSPORTER_ACTIVITY	28		Rejected!
PURINE_RIBONUCLEOTIDE_BINDING	206	92
AMINE_BINDING	23		Rejected!
ORGANIC_ACID_TRANSMEMBRANE_TRANSPORTER_ACTIVITY	45	20
UNFOLDED_PROTEIN_BINDING	42	17
TRANSITION_METAL_ION_BINDING	111	42
OXIDOREDUCTASE_ACTIVITY__ACTING_ON_THE_ALDEHYDE_OR_OXO_GROUP_OF_DONORS__NAD_OR_NADP_AS_ACCEPTOR	16		Rejected!
SH3_SH2_ADAPTOR_ACTIVITY	43	16
SMALL_CONJUGATING_PROTEIN_LIGASE_ACTIVITY	51	27
TRANSFERASE_ACTIVITY__TRANSFERRING_SULFUR_CONTAINING_GROUPS	32		Rejected!
GLYCOSAMINOGLYCAN_BINDING	34		Rejected!
PHOSPHATASE_BINDING	13		Rejected!
CARBOXYLIC_ACID_TRANSMEMBRANE_TRANSPORTER_ACTIVITY	44	20
NICOTINIC_ACETYLCHOLINE_ACTIVATED_CATION_SELECTIVE_CHANNEL_ACTIVITY	11		Rejected!
PHOSPHATASE_REGULATOR_ACTIVITY	26		Rejected!
CALMODULIN_BINDING	25		Rejected!
GLUTATHIONE_TRANSFERASE_ACTIVITY	15		Rejected!
TRANSMEMBRANE_TRANSPORTER_ACTIVITY	375	137
PYROPHOSPHATASE_ACTIVITY	226	98
THYROID_HORMONE_RECEPTOR_BINDING	17		Rejected!
CYTOKINE_BINDING	49	15
HYDROLASE_ACTIVITY__ACTING_ON_CARBON_NITROGEN__BUT_NOT_PEPTIDE__BONDS__IN_LINEAR_AMIDES	21		Rejected!
SERINE_TYPE_ENDOPEPTIDASE_ACTIVITY	41		Rejected!
TRANSLATION_INITIATION_FACTOR_ACTIVITY	24		Rejected!
TRANSITION_METAL_ION_TRANSMEMBRANE_TRANSPORTER_ACTIVITY	10		Rejected!
NUCLEASE_ACTIVITY	55	18
SECRETIN_LIKE_RECEPTOR_ACTIVITY	11		Rejected!
RIBONUCLEOPROTEIN_BINDING	12		Rejected!
ATPASE_ACTIVITY__COUPLED_TO_MOVEMENT_OF_SUBSTANCES	40	20
GENERAL_RNA_POLYMERASE_II_TRANSCRIPTION_FACTOR_ACTIVITY	32		Rejected!
TRANSFERASE_ACTIVITY__TRANSFERRING_GROUPS_OTHER_THAN_AMINO_ACYL_GROUPS	49	23
DNA_BINDING	602	290
UBIQUITIN_PROTEIN_LIGASE_ACTIVITY	49	26
GALACTOSYLTRANSFERASE_ACTIVITY	16		Rejected!
CYCLASE_ACTIVITY	11		Rejected!
SINGLE_STRANDED_RNA_BINDING	13		Rejected!
GUANYL_NUCLEOTIDE_EXCHANGE_FACTOR_ACTIVITY	47	15
ION_TRANSMEMBRANE_TRANSPORTER_ACTIVITY	278	101
PHOSPHOLIPID_TRANSPORTER_ACTIVITY	12		Rejected!
LOW_DENSITY_LIPOPROTEIN_BINDING	12		Rejected!
HORMONE_RECEPTOR_BINDING	29		Rejected!
CYTOKINE_ACTIVITY	113	45
ATP_BINDING	157	70
METALLOENDOPEPTIDASE_ACTIVITY	27		Rejected!
ISOMERASE_ACTIVITY	36		Rejected!
GROWTH_FACTOR_ACTIVITY	56	18
MAP_KINASE_KINASE_KINASE_ACTIVITY	10		Rejected!
CASPASE_REGULATOR_ACTIVITY	14		Rejected!
EXTRACELLULAR_MATRIX_STRUCTURAL_CONSTITUENT	27		Rejected!
ANTIOXIDANT_ACTIVITY	18		Rejected!
ENDONUCLEASE_ACTIVITY_GO_0016893	11		Rejected!
TRANSCRIPTION_COFACTOR_ACTIVITY	228	102
INOSITOL_OR_PHOSPHATIDYLINOSITOL_KINASE_ACTIVITY	18		Rejected!
CHESLER_D6MIT150_TRANSCRIPTION_FACTORS_GLOCUS	12		Rejected!
DEATHPATHWAY	33	15
MRNA_PROCESSING	47	23
LE_MYELIN_DN	103	41
TCAPOPTOSISPATHWAY	11		Rejected!
MRNA_PROCESSING_REACTOME	121	39
ATP_SYNTHESIS	22		Rejected!
ROSS_CBF	82	32
AGUIRRE_PANCREAS_CHR12	59	21
CCR3PATHWAY	23		Rejected!
NEUTROPHILPATHWAY	8		Rejected!
INOSITOL_METABOLISM	5		Rejected!
TRYPTOPHAN_METABOLISM	55	17
ELECTRON_TRANSPORTER_ACTIVITY	128	34
ACETYLCHOLINE_SYNTHESIS	8		Rejected!
ALTERNATIVEPATHWAY	9		Rejected!
BYSTRYKH_SCP2_CIS_TRANSCRIPTS_GLOCUS	8		Rejected!
PGC1APATHWAY	24		Rejected!
ST_INTERFERON_GAMMA_PATHWAY	10		Rejected!
HUMAN_MITODB_6_2002	428	110
CITRATE_CYCLE_TCA_CYCLE	21		Rejected!
ST_WNT_CA2_CYCLIC_GMP_PATHWAY	20		Rejected!
BIOSYNTHESIS_OF_STEROIDS	15		Rejected!
KENNY_WNT_UP	51	22
TYPE_III_SECRETION_SYSTEM	22		Rejected!
TGF_BETA_SIGNALING_PATHWAY	60	31
PMLPATHWAY	17		Rejected!
CHEOK_MP_DN	5		Rejected!
CALCINEURINPATHWAY	19		Rejected!
ST_INTERLEUKIN_13_PATHWAY	7		Rejected!
PANTOTHENATE_AND_COA_BIOSYNTHESIS	12		Rejected!
AGUIRRE_PANCREAS_CHR9	24		Rejected!
RANPATHWAY	5		Rejected!
GLYCEROPHOSPHOLIPID_METABOLISM	51	15
RANKLPATHWAY	14		Rejected!
D4GDIPATHWAY	13		Rejected!
NELSON_ANDROGEN_DN	19		Rejected!
ICHIBA_GVHD	335	77
NITROGEN_METABOLISM	21		Rejected!
KREBPATHWAY	8		Rejected!
JISON_SICKLE_CELL	32		Rejected!
TARTE_PC	81	30
BYSTROM_IL5_DN	73	40
ST_DIFFERENTIATION_PATHWAY_IN_PC12_CELLS	47	20
CORDERO_KRAS_KD_VS_CONTROL_DN	66	22
TERCPATHWAY	6		Rejected!
TNFR1PATHWAY	29		Rejected!
OVARIAN_INFERTILITY_GENES	25		Rejected!
SHEPARD_CRASH_AND_BURN_MUT_VS_WT_UP	208	43
INTRINSICPATHWAY	23		Rejected!
RARRXRPATHWAY	15		Rejected!
EXTRINSICPATHWAY	13		Rejected!
ECMPATHWAY	23		Rejected!
BRENTANI_IMMUNE_FUNCTION	54		Rejected!
HOX_GENES	56	24
ZHAN_TONSIL_PCBC	49	18
KREBS_TCA_CYCLE	36		Rejected!
ELECTRON_TRANSPORT_CHAIN	110	15
RASPATHWAY	23		Rejected!
SKP2E2FPATHWAY	10		Rejected!
ROSS_PML_RAR	80	25
ST_TUMOR_NECROSIS_FACTOR_PATHWAY	29		Rejected!
NO2IL12PATHWAY	17		Rejected!
GLEEVECPATHWAY	22		Rejected!
ZUCCHI_EPITHELIAL_DN	50	17
SA_PTEN_PATHWAY	17		Rejected!
CIRCADIANPATHWAY	6		Rejected!
LEI_HOXC8_UP	16		Rejected!
BBCELLPATHWAY	8		Rejected!
KERATINOCYTEPATHWAY	46	22
CELL_MOTILITY	118	41
CHEMICALPATHWAY	22		Rejected!
HIFPATHWAY	15		Rejected!
METHIONINEPATHWAY	5		Rejected!
BRENTANI_CYTOSKELETON	25		Rejected!
PARK_HSC_VS_MPP_DN	20		Rejected!
PASSERINI_APOPTOSIS	43		Rejected!
LEE_CIP_DN	66	21
CASPASEPATHWAY	23		Rejected!
ASTON_DEPRESSION_DN	154	78
BADPATHWAY	22		Rejected!
ST_ERK1_ERK2_MAPK_PATHWAY	32	18
STANELLE_E2F1_UP	29		Rejected!
TSP1PATHWAY	7		Rejected!
ARENRF2PATHWAY	14		Rejected!
CHESLER_D6MIT150_CIS_GLOCUS	7		Rejected!
FERRANDO_T_CELL_DIFFERENTIATION_PATHWAY	19		Rejected!
SA_G2_AND_M_PHASES	8		Rejected!
N_GLYCAN_BIOSYNTHESIS	22		Rejected!
SIG_CD40PATHWAYMAP	34		Rejected!
FLAGELLAR_ASSEMBLY	22		Rejected!
SIG_PIP3_SIGNALING_IN_CARDIAC_MYOCTES	67	36
TGFBPATHWAY	19		Rejected!
SHIPP_DLBCL_CURED_DN	37		Rejected!
1_2_DICHLOROETHANE_DEGRADATION	8		Rejected!
GRANDVAUX_IFN_NOT_IRF3_UP	15		Rejected!
UEDA_MOUSE_SCN	93	43
CACAMPATHWAY	14		Rejected!
BYSTRYKH_FGF3_TARGETS_GLOCUS	8		Rejected!
YEN_MYC_WT	10		Rejected!
GPCRPATHWAY	35	21
BLYMPHOCYTEPATHWAY	11		Rejected!
LIMONENE_AND_PINENE_DEGRADATION	12		Rejected!
GOLUB_ALL_VS_AML_UP	19		Rejected!
CHOLESTEROL_BIOSYNTHESIS	17		Rejected!
HOUSTIS_ROS	36		Rejected!
LONGEVITYPATHWAY	14		Rejected!
GLUCONEOGENESIS	54	18
HADDAD_HSC_CD7_DN	84	42
MITOCHONDRIAL_FATTY_ACID_BETAOXIDATION	17		Rejected!
SA_DIACYLGLYCEROL_SIGNALING	10		Rejected!
BASSO_REGULATORY_HUBS	143	43
REDUCTIVE_CARBOXYLATE_CYCLE_CO2_FIXATION	9		Rejected!
REELINPATHWAY	7		Rejected!
BYSTRYKH_HSC_CIS_GLOCUS	145	43
PS1PATHWAY	14		Rejected!
RABPATHWAY	12		Rejected!
SCHUMACHER_MYC_DN	9		Rejected!
UNDERHILL_PROLIFERATION	19		Rejected!
DAVIES_MGUS_MM	41		Rejected!
CERAMIDEPATHWAY	22		Rejected!
LEI_HOXC8_DN	17		Rejected!
SHHPATHWAY	16		Rejected!
GANGLIOSIDE_BIOSYNTHESIS	14		Rejected!
SRCRPTPPATHWAY	11		Rejected!
BRENTANI_SIGNALING	198	86
CHESLER_BRAIN_CIS_GENES	80	31
ONE_CARBON_POOL_BY_FOLATE	15		Rejected!
ROSS_CBF_MYH	54	22
PROTEASOMEPATHWAY	21		Rejected!
LIZUKA_L0_GR_L1	16		Rejected!
LIZUKA_L1_SM_G1	10		Rejected!
CELL_SURFACE_RECEPTOR_LINKED_SIGNAL_TRANSDUCTION	145	52
ST_GA12_PATHWAY	23		Rejected!
RBPATHWAY	13		Rejected!
CDK5PATHWAY	13		Rejected!
GAMMA_HEXACHLOROCYCLOHEXANE_DEGRADATION	32		Rejected!
MAPKPATHWAY	87	40
HEME_BIOSYNTHESIS	9		Rejected!
O_GLYCAN_BIOSYNTHESIS	16		Rejected!
EEA1PATHWAY	7		Rejected!
PKCPATHWAY	7		Rejected!
BRENTANI_REPAIR	41		Rejected!
CHESLER_BRAIN_ONLY_SUBSET	26		Rejected!
GABAPATHWAY	12		Rejected!
FERRANDO_TAL1_NEIGHBORS	16		Rejected!
AGUIRRE_PANCREAS_CHR1	31		Rejected!
CREMPATHWAY	7		Rejected!
BYSTRYKH_HSC_BRAIN_TRANS_GLOCUS	210	58
GPCRDB_CLASS_A_RHODOPSIN_LIKE2	15		Rejected!
CHAUHAN_2ME2	50	15
GALACTOSE_METABOLISM	24		Rejected!
PENG_LEUCINE_UP	125	30
NUCLEOTIDE_GPCRS	10		Rejected!
CCR5PATHWAY	18		Rejected!
STILBENE_COUMARINE_AND_LIGNIN_BIOSYNTHESIS	10		Rejected!
DNAFRAGMENTPATHWAY	10		Rejected!
LEE_MYC_TGFA_DN	66	23
NTHIPATHWAY	24		Rejected!
IRINOTECAN_PATHWAY_PHARMGKB	11		Rejected!
GLOBOSIDE_METABOLISM	15		Rejected!
ST_G_ALPHA_S_PATHWAY	16		Rejected!
LIZUKA_G1_SM_G2	25	18
CFTRPATHWAY	12		Rejected!
GOLDRATH_HP	188	75
HEMATOPOESIS_RELATED_TRANSCRIPTION_FACTORS	86	47
LAMB_CYCLIN_D1_UP	15		Rejected!
PAR1PATHWAY	21	15
GNATENKO_PLATELET	47		Rejected!
CYSTEINE_METABOLISM	8		Rejected!
PDGFPATHWAY	27	15
KIM_TH_CELLS_UP	67	30
SHEPARD_BMYB_MORPHOLINO_DN	208	64
BYSTRYKH_HSC_BRAIN_CIS_GLOCUS	71	21
ZELLER_MYC_DN	7		Rejected!
LEE_ACOX1_DN	65	20
IL3PATHWAY	15		Rejected!
PROTEASOME	17		Rejected!
ETCPATHWAY	10		Rejected!
ST_G_ALPHA_I_PATHWAY	36	21
PENG_GLUCOSE_UP	43		Rejected!
SMITH_HTERT_UP	117	40
SLRPPATHWAY	6		Rejected!
EGFPATHWAY	27	16
LEE_MYC_UP	54	18
GPCRS_CLASS_C_METABOTROPIC_GLUTAMATE_PHEROMONE	14		Rejected!
MENSSEN_MYC_UP	34		Rejected!
PGC	425	101
LIZUKA_L0_SM_L1	20		Rejected!
THELPERPATHWAY	14		Rejected!
ABRAHAM_MM_VS_AL_UP	20		Rejected!
NUTT_GBN_VS_AO_DN	9		Rejected!
DNA_DAMAGE_SIGNALING	95	37
JECHLINGER_EMT_UP	57	19
PYRIMIDINE_METABOLISM	61	23
IL22BPPATHWAY	13		Rejected!
DER_IFNA_UP	66	29
MTA3PATHWAY	16		Rejected!
BIOPEPTIDESPATHWAY	39	23
MPRPATHWAY	23		Rejected!
IL1RPATHWAY	33	16
ST_DICTYOSTELIUM_DISCOIDEUM_CAMP_CHEMOTAXIS_PATHWAY	33	17
RAC1PATHWAY	22		Rejected!
KANNAN_P53_UP	40		Rejected!
GCRPATHWAY	19		Rejected!
CELL_CYCLE_KEGG	90	35
PENG_GLUTAMINE_UP	296	87
SPPAPATHWAY	22		Rejected!
WELCH_GATA1	24		Rejected!
RHOPATHWAY	31		Rejected!
PYK2PATHWAY	29	16
UREACYCLEPATHWAY	7		Rejected!
PLK3PATHWAY	8		Rejected!
STEMPATHWAY	15		Rejected!
FRASOR_ER_UP	32	17
TCA	15		Rejected!
LEE_MYC_TGFA_UP	61		Rejected!
FLECHNER_KIDNEY_TRANSPLANT_WELL_PBL_DN	42	20
HEPARAN_SULFATE_BIOSYNTHESIS	8		Rejected!
DORSAM_HOXA9_UP	35	20
ASBCELLPATHWAY	12		Rejected!
PASSERINI_TRANSCRIPTION	75	37
CTLA4PATHWAY	21		Rejected!
SIG_CHEMOTAXIS	45	24
BECKER_ESTROGEN_RESPONSIVE_SUBSET_2	9		Rejected!
HINATA_NFKB_UP	111	47
MUSCLE_MYOSIN	15		Rejected!
IL10PATHWAY	13		Rejected!
DER_IFNB_DN	9		Rejected!
MRNA_BINDING_ACTIVITY	9		Rejected!
LIZUKA_G2_GR_G3	27		Rejected!
AMINOACYL_TRNA_BIOSYNTHESIS	23		Rejected!
NUCLEOTIDE_SUGARS_METABOLISM	5		Rejected!
ST_IL_13_PATHWAY	7		Rejected!
PASSERINI_EM	42	16
NING_COPD_DN	144	40
PEPTIDE_GPCRS	75	19
BILE_ACID_BIOSYNTHESIS	28		Rejected!
SA_PROGRAMMED_CELL_DEATH	12		Rejected!
HYPERTROPHY_MODEL	20		Rejected!
ASTON_OLIGODENDROGLIA_MYELINATION_SUBSET	17		Rejected!
ST_P38_MAPK_PATHWAY	37	17
FOSBPATHWAY	5		Rejected!
KLEIN_PEL_DN	58	27
CDC42RACPATHWAY	15		Rejected!
AGUIRRE_PANCREAS_CHR19	74		Rejected!
BLOOD_CLOTTING_CASCADE	21		Rejected!
EIF4PATHWAY	24		Rejected!
SIG_IL4RECEPTOR_IN_B_LYPHOCYTES	27	15
SHEPARD_GENES_COMMON_BW_CB_MO	79	27
DCPATHWAY	22		Rejected!
ACTINYPATHWAY	19		Rejected!
MYOSINPATHWAY	15		Rejected!
KANNAN_P53_DN	19		Rejected!
BETAOXIDATIONPATHWAY	6		Rejected!
PASSERINI_ADHESION	38	16
MITRPATHWAY	9		Rejected!
SANA_TNFA_ENDOTHELIAL_DN	85	30
LEPTINPATHWAY	10		Rejected!
TCRAPATHWAY	13		Rejected!
ARGININE_AND_PROLINE_METABOLISM	46		Rejected!
TARTE_MATURE_PC	410	115
WILLERT_WNT_NCCIT_ALL_UP	23		Rejected!
FETAL_LIVER_VS_ADULT_LIVER_GNF2	80		Rejected!
AGUIRRE_PANCREAS_CHR18	17		Rejected!
WELCSH_BRCA_DN	13		Rejected!
PENG_LEUCINE_DN	180	54
BYSTRYKH_RUNX1_TARGETS_GLOCUS	10		Rejected!
KENNY_WNT_DN	56	17
TOB1PATHWAY	21		Rejected!
PLCDPATHWAY	5		Rejected!
AMINOSUGARS_METABOLISM	15		Rejected!
IL7PATHWAY	16		Rejected!
CROONQUIST_RAS_STROMA_UP	25		Rejected!
CHEOK_LDMTX_MP_UP	5		Rejected!
GLYCEROLIPID_METABOLISM	46	17
WONG_IFNA_HCC_RESISTANT_VS_SENSITIVE_UP	18		Rejected!
CHESLER_BRAIN_TRANS_GENES	9		Rejected!
CDMACPATHWAY	16		Rejected!
ABRAHAM_MM_VS_AL_DN	26		Rejected!
WNT_SIGNALING	65	30
FMLPPATHWAY	37	19
TELPATHWAY	18		Rejected!
GLUTAMATE_METABOLISM	24		Rejected!
CHONDROITIN	8		Rejected!
LIZUKA_G1_GR_G2	12		Rejected!
NUTT_GBN_VS_AO_UP	8		Rejected!
BECKER_TAMOXIFEN_RESISTANT_UP	41		Rejected!
SHEPARD_CRASH_AND_BURN_MUT_VS_WT_DN	198	66
IL17PATHWAY	17		Rejected!
CBLPATHWAY	13		Rejected!
HBXPATHWAY	8		Rejected!
CHREBPPATHWAY	20		Rejected!
NUCLEAR_RECEPTORS	40	21
STARCH_AND_SUCROSE_METABOLISM	35		Rejected!
KIM_TH_CELLS_DN	27		Rejected!
PENTOSE_PHOSPHATE_PATHWAY	25		Rejected!
BRENTANI_TRANSPORT	7		Rejected!
RADAEVA_IFNA_UP	51	15
AKTPATHWAY	19		Rejected!
VALINE_LEUCINE_AND_ISOLEUCINE_DEGRADATION	36	15
INFLAMPATHWAY	29		Rejected!
PEART_HISTONE_UP	59	23
BRENTANI_CELL_CYCLE	86	35
PTC1PATHWAY	11		Rejected!
ST_JAK_STAT_PATHWAY	9		Rejected!
TARTE_BCELL	38	17
WELCSH_BRCA_UP	42	25
KUROKAWA_5FU_IFN_SENSITIVE_VS_RESISTANT_DN	48	15
FATTY_ACID_METABOLISM	86	37
PASSERINI_INFLAMMATION	25		Rejected!
PARK_HSC_VS_MPP_UP	21		Rejected!
TUBBYPATHWAY	7		Rejected!
BOTULINPATHWAY	5		Rejected!
GOLDRATH_CYTOLYTIC	25		Rejected!
AGUIRRE_PANCREAS_CHR7	48		Rejected!
YAGI_AML_PROGNOSIS	35		Rejected!
ALANINE_AND_ASPARTATE_METABOLISM	22		Rejected!
TALL1PATHWAY	15		Rejected!
SHIPP_DLBCL_CURED_UP	30		Rejected!
BENZOATE_DEGRADATION_VIA_COA_LIGATION	10		Rejected!
COMPPATHWAY	19		Rejected!
SIG_REGULATION_OF_THE_ACTIN_CYTOSKELETON_BY_RHO_GTPASES	35	16
FLECHNER_KIDNEY_TRANSPLANT_REJECTION_UP	87	23
S1P_SIGNALING	25		Rejected!
ELECTRON_TRANSPORT	87	28
FASPATHWAY	30		Rejected!
IONPATHWAY	5		Rejected!
FATTY_ACID_SYNTHESIS	17		Rejected!
ST_GRANULE_CELL_SURVIVAL_PATHWAY	28		Rejected!
PHOTOSYNTHESIS	23		Rejected!
PASSERINI_SIGNAL	341	155
LEE_ACOX1_UP	67	18
HUMAN_CD34_ENRICHED_TRANSCRIPTION_FACTORS	202	93
IFNAPATHWAY	9		Rejected!
LIZUKA_G2_SM_G3	9		Rejected!
CHEOK_MP_UP	5		Rejected!
COMPLEMENT_ACTIVATION_CLASSICAL	16		Rejected!
UEDA_MOUSE_LIVER	165	66
RNA_POLYMERASE	14		Rejected!
PHENYLALANINE_METABOLISM	22		Rejected!
GLYCOSAMINOGLYCAN_DEGRADATION	11		Rejected!
AGPCRPATHWAY	13		Rejected!
PARKINPATHWAY	12		Rejected!
VITCBPATHWAY	11		Rejected!
CELL2CELLPATHWAY	13		Rejected!
ARGININECPATHWAY	6		Rejected!
CD40PATHWAY	15		Rejected!
G13_SIGNALING_PATHWAY	45	21
BECKER_IFN_INDUCIBLE_SUBSET_1	7		Rejected!
APOPTOSIS	70	33
HADDAD_HSC_CD10_UP	296	133
CHESLER_BRAIN_HIGHEST_VARIANCE_GENES	45		Rejected!
ZELLER_MYC_UP	26		Rejected!
HOGERKORP_ANTI_CD44_UP	25		Rejected!
CELL_CYCLE_CHECKPOINT	26		Rejected!
ALKALOID_BIOSYNTHESIS_II	5		Rejected!
CHEN_LUNG_SURVIVAL	29		Rejected!
BUTANOATE_METABOLISM	29		Rejected!
ZHAN_TONSIL_BONEMARROW	50	18
METHIONINE_METABOLISM	13		Rejected!
SULFUR_METABOLISM	9		Rejected!
IGF1PATHWAY	20		Rejected!
POMEROY_DESMOPLASIC_VS_CLASSIC_MD_UP	47	17
CHANG_SERUM_RESPONSE_UP	149	53
BLOOD_GROUP_GLYCOLIPID_BIOSYNTHESIS_NEOLACTOSERIES	7		Rejected!
CELL_PROLIFERATION	232	78
BRENTANI_ANGIOGENESIS	10		Rejected!
BRENTANI_DEATH	76	28
EICOSANOID_SYNTHESIS	18		Rejected!
WIELAND_HEPATITIS_B_INDUCED	106	28
IL2RBPATHWAY	37	16
CROONQUIST_RAS_STROMA_DN	21		Rejected!
DNA_POLYMERASE	9		Rejected!
INOSITOL_PHOSPHATE_METABOLISM	26		Rejected!
NKTPATHWAY	29		Rejected!
METHANE_METABOLISM	13		Rejected!
FATTY_ACID_DEGRADATION	33		Rejected!
AGUIRRE_PANCREAS_CHR8	61	20
FATTY_ACID_BIOSYNTHESIS_PATH_2	9		Rejected!
SHEPARD_BMYB_MORPHOLINO_UP	216	59
STURLA_SONIC_HEDGEHOG	18		Rejected!
GOLUB_ALL_VS_AML_DN	16		Rejected!
PROTEASOME_DEGRADATION	32		Rejected!
APOPTOSIS_KEGG	50	21
G2PATHWAY	24		Rejected!
BCRPATHWAY	35	17
DISTECHE_XINACTIVATED_GENES	21		Rejected!
PHENYLALANINE_TYROSINE_AND_TRYPTOPHAN_BIOSYNTHESIS	10		Rejected!
DER_IFNB_UP	93	45
FOLATE_BIOSYNTHESIS	10		Rejected!
GLYCOGEN_METABOLISM	36	17
MANALO_HYPOXIA_DN	91	34
MRNA_SPLICING	58	21
CHESLER_HIGHEST_FOLD_RANGE_GENES	46	22
TCRMOLECULE	6		Rejected!
MAGRANGEAS_MULTIPLE_MYELOMA_IGG_VS_IGA_DN	27		Rejected!
FEEDERPATHWAY	9		Rejected!
CELL_CYCLE_REGULATOR	26		Rejected!
P53PATHWAY	16		Rejected!
PROSTAGLANDIN_AND_LEUKOTRIENE_METABOLISM	33		Rejected!
LEE_MYC_E2F1_DN	64	26
BYSTROM_IL5_UP	55	17
CROONQUIST_IL6_STARVE_UP	34		Rejected!
AMIPATHWAY	24		Rejected!
ST_ADRENERGIC	37	16
ST_INTEGRIN_SIGNALING_PATHWAY	82	39
ZUCCHI_EPITHELIAL_UP	50	15
CHESLER_D6MIT150_NEURAL_TARGETS_GLOCUS	9		Rejected!
ST_GAQ_PATHWAY	28		Rejected!
NELSON_ANDROGEN_UP	86	36
CAPROLACTAM_DEGRADATION	5		Rejected!
VOBESITYPATHWAY	8		Rejected!
LIN_WNT_UP	56	16
CDC25PATHWAY	9		Rejected!
RECKPATHWAY	9		Rejected!
CARM1PATHWAY	13		Rejected!
GLYCOLYSIS	54	18
MTORPATHWAY	23		Rejected!
ST_GA13_PATHWAY	37	15
ROME_INSULIN_2F_UP	235	76
VANTVEER_BREAST_OUTCOME_GOOD_VS_POOR_DN	112	32
BROCKE_IL6	147	76
GLYOXYLATE_AND_DICARBOXYLATE_METABOLISM	12		Rejected!
TH1TH2PATHWAY	19		Rejected!
RNAPATHWAY	10		Rejected!
BECKER_CANCER_ASSOCIATED_SUBSET_1	9		Rejected!
POMEROY_DESMOPLASIC_VS_CLASSIC_MD_DN	41	16
ROME_INSULIN_2F_DN	36		Rejected!
HCC_SURVIVAL_GOOD_VS_POOR_DN	183	57
FBW7PATHWAY	9		Rejected!
EIF2PATHWAY	11		Rejected!
LOTEM_LEUKEMIA_UP	26		Rejected!
BECKER_CANCER_ASSOCIATED_SUBSET_2	14		Rejected!
FRASOR_ER_DN	74	30
LYMPHOCYTEPATHWAY	9		Rejected!
CELL_DEATH	13		Rejected!
ST_STAT3_PATHWAY	11		Rejected!
CHEOK_HDMTX_DN	5		Rejected!
G_PROTEIN_SIGNALING	97	52
SA_BONE_MORPHOGENETIC	7		Rejected!
TENEDINI_MEGAKARYOCYTIC_GENES	54	27
SA_B_CELL_RECEPTOR_COMPLEXES	24		Rejected!
PORPHYRIN_AND_CHLOROPHYLL_METABOLISM	21		Rejected!
G1PATHWAY	28		Rejected!
CELL_CYCLE_CHECKPOINT_II	10		Rejected!
BRENTANI_CELL_ADHESION	95	44
ACE2PATHWAY	12		Rejected!
ERK5PATHWAY	17		Rejected!
AKAP13PATHWAY	11		Rejected!
HCC_SURVIVAL_GOOD_VS_POOR_UP	194	31
TERTPATHWAY	8		Rejected!
ERYTHPATHWAY	15		Rejected!
INSULINPATHWAY	21		Rejected!
TARTE_PLASMA_BLASTIC	310	110
SIG_INSULIN_RECEPTOR_PATHWAY_IN_CARDIAC_MYOCYTES	51	28
BREAST_CANCER_ESTROGEN_SIGNALING	101	44
TUMOR_SUPRESSOR	26		Rejected!
ST_T_CELL_SIGNAL_TRANSDUCTION	45	20
ERBB3PATHWAY	5		Rejected!
CELLCYCLEPATHWAY	23	17
SMITH_HCV_INDUCED_HCC_UP	48	16
JECHLINGER_EMT_DN	40	15
MITOCHONDRIA	447	110
BREAST_DUCTAL_CARCINOMA_GENES	32		Rejected!
ROSS_MLL_FUSION	83	24
LAIRPATHWAY	17		Rejected!
STEROID_BIOSYNTHESIS	9		Rejected!
MAPKKK_CASCADE	9		Rejected!
SALMONELLAPATHWAY	12		Rejected!
SMALL_LIGAND_GPCRS	18		Rejected!
HIVNEFPATHWAY	58	30
GRANDVAUX_IRF3_UP	13		Rejected!
HDACPATHWAY	30		Rejected!
ERBB4PATHWAY	7		Rejected!
AHSPPATHWAY	13		Rejected!
RADIATION_SENSITIVITY	27		Rejected!
ROSS_CBF_LEUKEMIA	75	24
ST_TYPE_I_INTERFERON_PATHWAY	9		Rejected!
KUROKAWA_5FU_IFN_SENSITIVE_VS_RESISTANT_UP	14		Rejected!
CELL_GROWTH_AND_OR_MAINTENANCE	71	31
LEE_MYC_E2F1_UP	57	20
FLUMAZENILPATHWAY	9		Rejected!
ALKPATHWAY	37		Rejected!
ATMPATHWAY	20		Rejected!
ASTON_DEPRESSION_UP	46	18
RIBOSOMAL_PROTEINS	123	18
APOPTOSIS_GENMAPP	43	20
P35ALZHEIMERSPATHWAY	11		Rejected!
LE_MYELIN_UP	105	42
CTLPATHWAY	15		Rejected!
FERNANDEZ_MYC_TARGETS	180	67
ACETAMINOPHENPATHWAY	6		Rejected!
BRENTANI_TRANSPORT_OF_VESICLES	26		Rejected!
FLECHNER_KIDNEY_TRANSPLANT_WELL_PBL_UP	153	46
TPOPATHWAY	23		Rejected!
UREA_CYCLE_AND_METABOLISM_OF_AMINO_GROUPS	21		Rejected!
GPCRDB_OTHER	71	20
SETPATHWAY	11		Rejected!
ROSS_FAB_M7	69	24
MOOTHA_VOXPHOS	87	15
ANDROGEN_GENES	62	16
FLECHNER_KIDNEY_TRANSPLANT_REJECTION_PBL_DN	51	21
RNA_TRANSCRIPTION_REACTOME	39		Rejected!
PHOSPHATIDYLINOSITOL_SIGNALING_SYSTEM	90	39
PPARAPATHWAY	57	27
CROONQUIST_IL6_RAS_UP	23		Rejected!
SHEPARD_NEG_REG_OF_CELL_PROLIFERATION	116	49
1_AND_2_METHYLNAPHTHALENE_DEGRADATION	8		Rejected!
DER_IFNG_DN	10		Rejected!
PELP1PATHWAY	7		Rejected!
MARSHALL_SPLEEN_BAL	31		Rejected!
SANA_IFNG_ENDOTHELIAL_UP	75	20
SPRYPATHWAY	18		Rejected!
PENTOSE_AND_GLUCURONATE_INTERCONVERSIONS	14		Rejected!
PTDINSPATHWAY	23		Rejected!
MONOAMINE_GPCRS	33		Rejected!
TESTIS_EXPRESSED_GENES	73	21
C21_STEROID_HORMONE_METABOLISM	11		Rejected!
CELL_ADHESION	201	65
UCALPAINPATHWAY	18		Rejected!
CLASSICPATHWAY	14		Rejected!
PEPIPATHWAY	8		Rejected!
SANA_TNFA_ENDOTHELIAL_UP	83	35
POMEROY_MD_TREATMENT_GOOD_VS_POOR_UP	31		Rejected!
SCHUMACHER_MYC_UP	54	26
BRENTANI_CANCER_TESTIS	12		Rejected!
LAMB_CYCLIN_D3_GLOCUS	15		Rejected!
CHANG_SERUM_RESPONSE_DN	194	62
41BBPATHWAY	18		Rejected!
AKAPCENTROSOMEPATHWAY	15		Rejected!
IL6PATHWAY	21		Rejected!
MSPPATHWAY	6		Rejected!
CORDERO_KRAS_KD_VS_CONTROL_UP	84	35
MALATEXPATHWAY	8		Rejected!
CHEOK_HDMTX_UP	5		Rejected!
NICOTINATE_AND_NICOTINAMIDE_METABOLISM	14		Rejected!
EDG1PATHWAY	26		Rejected!
BLOOD_GROUP_GLYCOLIPID_BIOSYNTHESIS_LACTOSERIES	8		Rejected!
GSK3PATHWAY	27	16
GOLDRATH_CELLCYCLE	34		Rejected!
MATRIX_METALLOPROTEINASES	31		Rejected!
GPCRDB_CLASS_C_METABOTROPIC_GLUTAMATE_PHEROMONE	15		Rejected!
UBIQUITIN_MEDIATED_PROTEOLYSIS	25		Rejected!
PROLIFERATION_GENES	394	147
[truncated: 1,347 more rows]
