# Supplementary material for: Signatures of RNA binding proteins globally coupled to effective microRNA target sites
Source: HighWire-hosted journal article supplement (doi:10.1101/gr.103259.109), 2010-05-27
Supplement: Table_S13.zip [file GH_GHRHR_KO_24HRS_DN.xls]

NAME	PROBE	GENE SYMBOL	GENE_TITLE	RANK IN GENE LIST	RANK METRIC SCORE	RUNNING ES	CORE ENRICHMENT
row_0	DSC2	null	null	127	3.699057102203369	-0.0066083567	No
row_1	CALCRL	null	null	207	3.699057102203369	-0.006219629	No
row_2	NSMAF	null	null	587	2.744813919067383	-0.049562678	No
row_3	ABLIM1	null	null	590	2.744813919067383	-0.03794946	No
row_4	C17ORF39	null	null	635	2.699057102203369	-0.032458693	No
row_5	IPO8	null	null	675	2.619875907897949	-0.026239062	No
row_6	SRPK2	null	null	780	2.494936943054199	-0.029494649	No
row_7	BTBD1	null	null	791	2.4686079025268555	-0.019047612	No
row_8	NUMB	null	null	808	2.4686079025268555	-0.009475212	No
row_9	HOXD13	null	null	833	2.44378399848938	-0.0010689916	No
row_10	GABPA	null	null	1062	2.1805429458618164	-0.02240038	No
row_11	SOCS6	null	null	1087	2.154989004135132	-0.013994159	No
row_12	ITGA4	null	null	1116	2.142754077911377	-0.00617103	No
row_13	ARFGEF2	null	null	1134	2.130855083465576	0.0032555982	No
row_14	GRPEL1	null	null	1237	2.045844078063965	2.9155624E-4	No
row_15	PAPOLA	null	null	1376	1.9356290102005005	-0.007920299	No
row_16	FMR1	null	null	1394	1.9282050132751465	0.0015063293	No
row_17	ZNF143	null	null	1420	1.9066649675369263	0.009766777	No
row_18	KIAA0776	null	null	1469	1.8729820251464844	0.014674455	No
row_19	COX4NB	null	null	1491	1.8602080345153809	0.023517992	No
row_20	ENTPD7	null	null	1640	1.7747780084609985	0.013848411	No
row_21	PUM2	null	null	1689	1.754573941230774	0.01875609	No
row_22	RUVBL1	null	null	1829	1.6820240020751953	0.0103984615	No
row_23	METT5D1	null	null	2126	1.537688970565796	-0.020845462	No
row_24	TFAM	null	null	2202	1.4976600408554077	-0.019873645	No
row_25	VCL	null	null	2369	1.431885004043579	-0.032167133	No
row_26	TTC27	null	null	3033	1.2021269798278809	-0.11690959	No
row_27	STIM2	null	null	3155	1.166301965713501	-0.122643314	No
row_28	CDC42SE2	null	null	3226	1.1451740264892578	-0.12094264	No
row_29	DNAJC3	null	null	3403	1.0969970226287842	-0.13469385	No
row_30	PRPF40A	null	null	3537	1.0595699548721313	-0.14217684	No
row_31	APBB2	null	null	3660	1.0214500427246094	-0.14805633	No
row_32	RB1	null	null	3686	1.0142110586166382	-0.13979588	No
row_33	FAM103A1	null	null	3914	0.9532020092010498	-0.1609815	No
row_34	CUBN	null	null	4005	0.9304190278053284	-0.16219628	Yes
row_35	IFNAR1	null	null	4031	0.9223560094833374	-0.15393582	Yes
row_36	NUDT6	null	null	4039	0.9194599986076355	-0.14305148	Yes
row_37	ACTR3	null	null	4048	0.9173009991645813	-0.1323129	Yes
row_38	NCOA1	null	null	4077	0.910181999206543	-0.12448976	Yes
row_39	ADSS	null	null	4160	0.8868119716644287	-0.124538355	Yes
row_40	NCL	null	null	4205	0.8781989812850952	-0.11904758	Yes
row_41	DHX35	null	null	4310	0.8545799851417542	-0.12230317	Yes
row_42	CPSF2	null	null	4401	0.833361029624939	-0.12351794	Yes
row_43	ZBTB33	null	null	4410	0.8309999704360962	-0.11277936	Yes
row_44	MYH10	null	null	4430	0.8274840116500854	-0.103644274	Yes
row_45	JAGN1	null	null	4558	0.7959669828414917	-0.11025263	Yes
row_46	CBLB	null	null	4597	0.7884320020675659	-0.10388723	Yes
row_47	OSGEPL1	null	null	4874	0.7181450128555298	-0.13221571	Yes
row_48	SSFA2	null	null	4975	0.6934469938278198	-0.1348882	Yes
row_49	TBC1D23	null	null	5015	0.6841170191764832	-0.12866856	Yes
row_50	LYST	null	null	5019	0.6828600168228149	-0.11720113	Yes
row_51	SPATA2	null	null	5098	0.6616299748420715	-0.11666662	Yes
row_52	CBLL1	null	null	5130	0.653734028339386	-0.10928081	Yes
row_53	NARG1L	null	null	5266	0.6246060132980347	-0.11705535	Yes
row_54	TMEM33	null	null	5302	0.6162710189819336	-0.110252626	Yes
row_55	CLPX	null	null	5384	0.5990309715270996	-0.11015545	Yes
row_56	HPRT1	null	null	5451	0.5841119885444641	-0.107871674	Yes
row_57	MAP4K3	null	null	5482	0.5761860013008118	-0.10034009	Yes
row_58	SMC3	null	null	5538	0.5645610094070435	-0.09645282	Yes
row_59	SH2B3	null	null	5694	0.5255789756774902	-0.107142806	Yes
row_60	CROT	null	null	5847	0.4954800009727478	-0.11739548	Yes
row_61	GALNT7	null	null	5909	0.47868698835372925	-0.11438285	Yes
row_62	POLR3F	null	null	5949	0.47065600752830505	-0.108163215	Yes
row_63	SFRS10	null	null	5983	0.46025800704956055	-0.101068944	Yes
row_64	FAM98A	null	null	6008	0.4545319974422455	-0.09266273	Yes
row_65	DAB2	null	null	6168	0.4187059998512268	-0.10393581	Yes
row_66	SMARCA1	null	null	6209	0.40790998935699463	-0.097861946	Yes
row_67	RECQL	null	null	6226	0.40064001083374023	-0.088289544	Yes
row_68	TPD52	null	null	6291	0.3809939920902252	-0.08571423	Yes
row_69	GARNL1	null	null	6350	0.36661800742149353	-0.08226428	Yes
row_70	BIRC6	null	null	6376	0.36020201444625854	-0.07400383	Yes
row_71	RCN2	null	null	6423	0.34571799635887146	-0.06880461	Yes
row_72	CBX3	null	null	6424	0.34552499651908875	-0.056899846	Yes
row_73	CXADR	null	null	6449	0.33751800656318665	-0.048493627	Yes
row_74	ITGAV	null	null	6453	0.3360089957714081	-0.03702618	Yes
row_75	ID4	null	null	6600	0.2923460006713867	-0.046404216	Yes
row_76	NSBP1	null	null	6627	0.2840839922428131	-0.038289543	Yes
row_77	ARL1	null	null	6747	0.23635900020599365	-0.04373172	Yes
row_78	SCARB2	null	null	6759	0.23218899965286255	-0.033430457	Yes
row_79	SLC16A1	null	null	6779	0.22367599606513977	-0.024295373	Yes
row_80	USP53	null	null	6822	0.20811599493026733	-0.01851306	Yes
row_81	IMPACT	null	null	6886	0.15672899782657623	-0.01579197	Yes
row_82	NAB1	null	null	6905	0.13759799301624298	-0.0065111145	Yes
row_83	LASS6	null	null	6923	0.11393500119447708	0.0029155137	Yes
