# Supplementary material for: Signatures of RNA binding proteins globally coupled to effective microRNA target sites
Source: HighWire-hosted journal article supplement (doi:10.1101/gr.103259.109), 2010-05-27
Supplement: Table_S13.zip [file GPCRDB_CLASS_A_RHODOPSIN_LIKE.xls]

NAME	PROBE	GENE SYMBOL	GENE_TITLE	RANK IN GENE LIST	RANK METRIC SCORE	RUNNING ES	CORE ENRICHMENT
row_0	F2RL2	null	null	89	3.699057102203369	0.005601248	No
row_1	CCR6	null	null	158	3.699057102203369	0.01425039	No
row_2	EDNRB	null	null	794	2.4686079025268555	-0.059393644	No
row_3	DRD5	null	null	801	2.4686079025268555	-0.041745953	No
row_4	ADRA2A	null	null	1085	2.154989004135132	-0.06430145	No
row_5	CHML	null	null	1124	2.130855083465576	-0.05129817	No
row_6	NMUR1	null	null	1140	2.1192729473114014	-0.034956723	No
row_7	F2R	null	null	1155	2.107991933822632	-0.018470135	No
row_8	F2RL1	null	null	1249	2.036298990249634	-0.013449438	No
row_9	OR11A1	null	null	2042	1.571951985359192	-0.10988012	No
row_10	CCR2	null	null	2086	1.5529290437698364	-0.09760253	No
row_11	F2RL3	null	null	2484	1.3873029947280884	-0.13670374	No
row_12	AVPR1A	null	null	2722	1.301116943359375	-0.1525829	No
row_13	GPR44	null	null	3004	1.2105059623718262	-0.17484812	No
row_14	CCRL2	null	null	3092	1.183182954788208	-0.16895661	No
row_15	HRH1	null	null	3215	1.1488289833068848	-0.16814491	No
row_16	RHO	null	null	3484	1.0716910362243652	-0.18852334	No
row_17	OPN3	null	null	3529	1.0605679750442505	-0.17639089	No
row_18	C3AR1	null	null	3623	1.0316040515899658	-0.1713702	No
row_19	ADORA2B	null	null	3755	0.9940490126609802	-0.17186473	No
row_20	PTGER4	null	null	4088	0.9059649705886841	-0.20153199	No
row_21	GALR1	null	null	4090	0.9045689702033997	-0.1831586	No
row_22	BDKRB2	null	null	4438	0.8257359862327576	-0.21500294	Yes
row_23	NMUR2	null	null	4487	0.8171020150184631	-0.20345104	Yes
row_24	NPY1R	null	null	4511	0.8108770251274109	-0.18827069	Yes
row_25	P2RY5	null	null	4513	0.8097550272941589	-0.1698973	Yes
row_26	HCRTR2	null	null	4587	0.7895010113716125	-0.16197385	Yes
row_27	CCR9	null	null	4594	0.7884320020675659	-0.14432617	Yes
row_28	ADRB2	null	null	4616	0.7836570143699646	-0.12885554	Yes
row_29	CHRM2	null	null	4865	0.7199640274047852	-0.14633122	Yes
row_30	AGTR2	null	null	5009	0.6857979893684387	-0.14856741	Yes
row_31	RRH	null	null	5072	0.6696730256080627	-0.13904744	Yes
row_32	GRPR	null	null	5150	0.6490640044212341	-0.13170454	Yes
row_33	ADRB1	null	null	5230	0.6316140294075012	-0.12465192	Yes
row_34	CCR5	null	null	5298	0.6169899702072144	-0.11585763	Yes
row_35	EDNRA	null	null	5338	0.6077420115470886	-0.10299949	Yes
row_36	P2RY12	null	null	5366	0.6021469831466675	-0.08839969	Yes
row_37	RGR	null	null	5704	0.5241249799728394	-0.118792646	Yes
row_38	NPY2R	null	null	5777	0.5073260068893433	-0.110724054	Yes
row_39	HTR1F	null	null	5779	0.5070469975471497	-0.09235067	Yes
row_40	HTR2C	null	null	5798	0.5045430064201355	-0.07644463	Yes
row_41	HTR7	null	null	5850	0.49331098794937134	-0.06532814	Yes
row_42	GPR83	null	null	5856	0.49223101139068604	-0.04753532	Yes
row_43	PTGER2	null	null	5961	0.4675869941711426	-0.04411114	Yes
row_44	DRD1	null	null	6179	0.41485199332237244	-0.05708754	Yes
row_45	GPR37	null	null	6184	0.41372498869895935	-0.03914957	Yes
row_46	P2RY13	null	null	6200	0.4099139869213104	-0.022808122	Yes
row_47	LHCGR	null	null	6221	0.4030500054359436	-0.0071923607	Yes
row_48	PTGDR	null	null	6321	0.3739520013332367	-0.0030424916	Yes
row_49	CCRL1	null	null	6450	0.336573988199234	-0.0031016213	Yes
row_50	P2RY14	null	null	6461	0.33450600504875183	0.013965518	Yes
row_51	PTGFR	null	null	6696	0.26067298650741577	-0.0014782262	Yes
row_52	GPR85	null	null	6915	0.12202499806880951	-0.014599765	Yes
row_53	CNR1	null	null	6925	0.11370900273323059	0.002612513	Yes
