# Supplementary material for: Signatures of RNA binding proteins globally coupled to effective microRNA target sites
Source: HighWire-hosted journal article supplement (doi:10.1101/gr.103259.109), 2010-05-27
Supplement: Table_S13.zip [file GPCRS_CLASS_A_RHODOPSIN_LIKE.xls]

NAME	PROBE	GENE SYMBOL	GENE_TITLE	RANK IN GENE LIST	RANK METRIC SCORE	RUNNING ES	CORE ENRICHMENT
row_0	F2RL2	null	null	89	3.699057102203369	0.008372434	No
row_1	EDNRB	null	null	794	2.4686079025268555	-0.07242433	No
row_2	ADRA2A	null	null	1085	2.154989004135132	-0.093195	No
row_3	F2R	null	null	1155	2.107991933822632	-0.081922755	No
row_4	F2RL1	null	null	1249	2.036298990249634	-0.07413028	No
row_5	CCR2	null	null	2086	1.5529290437698364	-0.1740658	No
row_6	VIPR1	null	null	2321	1.4486370086669922	-0.186717	No
row_7	AVPR1A	null	null	2722	1.301116943359375	-0.22343664	No
row_8	GPR44	null	null	3004	1.2105059623718262	-0.24290238	No
row_9	CCRL2	null	null	3092	1.183182954788208	-0.23423997	No
row_10	HRH1	null	null	3215	1.1488289833068848	-0.23065223	No
row_11	OPN3	null	null	3529	1.0605679750442505	-0.25475767	No
row_12	C3AR1	null	null	3623	1.0316040515899658	-0.2469652	No
row_13	ADORA2B	null	null	3755	0.9940490126609802	-0.24468237	No
row_14	PTGER4	null	null	4088	0.9059649705886841	-0.27154264	No
row_15	GALR1	null	null	4090	0.9045689702033997	-0.25041103	No
row_16	BDKRB2	null	null	4438	0.8257359862327576	-0.27944618	Yes
row_17	NPY1R	null	null	4511	0.8108770251274109	-0.2686089	Yes
row_18	P2RY5	null	null	4513	0.8097550272941589	-0.2474773	Yes
row_19	HCRTR2	null	null	4587	0.7895010113716125	-0.23678501	Yes
row_20	CCR9	null	null	4594	0.7884320020675659	-0.21637836	Yes
row_21	ADRB2	null	null	4616	0.7836570143699646	-0.19814657	Yes
row_22	CHRM2	null	null	4865	0.7199640274047852	-0.21282764	Yes
row_23	AGTR2	null	null	5009	0.6857979893684387	-0.2122847	Yes
row_24	RRH	null	null	5072	0.6696730256080627	-0.19999751	Yes
row_25	GRPR	null	null	5150	0.6490640044212341	-0.1898852	Yes
row_26	ADRB1	null	null	5230	0.6316140294075012	-0.18006285	Yes
row_27	CCR5	null	null	5298	0.6169899702072144	-0.16850063	Yes
row_28	EDNRA	null	null	5338	0.6077420115470886	-0.15287866	Yes
row_29	P2RY12	null	null	5366	0.6021469831466675	-0.1355168	Yes
row_30	RGR	null	null	5704	0.5241249799728394	-0.16310205	Yes
row_31	NPY2R	null	null	5777	0.5073260068893433	-0.15226476	Yes
row_32	HTR1F	null	null	5779	0.5070469975471497	-0.13113315	Yes
row_33	HTR2C	null	null	5798	0.5045430064201355	-0.112466395	Yes
row_34	HTR7	null	null	5850	0.49331098794937134	-0.09858432	Yes
row_35	PTGER2	null	null	5961	0.4675869941711426	-0.09325669	Yes
row_36	DRD1	null	null	6179	0.41485199332237244	-0.10344304	Yes
row_37	PTGER3	null	null	6181	0.41462600231170654	-0.08231144	Yes
row_38	GPR37	null	null	6184	0.41372498869895935	-0.061324827	Yes
row_39	LHCGR	null	null	6221	0.4030500054359436	-0.04526789	Yes
row_40	PTGDR	null	null	6321	0.3739520013332367	-0.038345363	Yes
row_41	TSHR	null	null	6368	0.3635990023612976	-0.023738334	Yes
row_42	CCRL1	null	null	6450	0.336573988199234	-0.014205975	Yes
row_43	PTGFR	null	null	6696	0.26067298650741577	-0.028452069	Yes
row_44	GPR85	null	null	6915	0.12202499806880951	-0.03878342	Yes
row_45	CNR1	null	null	6925	0.11370900273323059	-0.018811738	Yes
row_46	FBXW2	null	null	6937	0.08669699728488922	8.699607E-4	Yes
