# Supplementary material for: Signatures of RNA binding proteins globally coupled to effective microRNA target sites
Source: HighWire-hosted journal article supplement (doi:10.1101/gr.103259.109), 2010-05-27
Supplement: Table_S13.zip [file gsea_report_for_na_neg_1266579792105.xls]

NAME	GS<br> follow link to MSigDB	GS DETAILS	SIZE	ES	NES	NOM p-val	FDR q-val	FWER p-val	RANK AT MAX	LEADING EDGE
BOQUEST_CD31PLUS_VS_CD31MINUS_DN	BOQUEST_CD31PLUS_VS_CD31MINUS_DN	Details ...	136	-0.19424379	-2.6430957	0.0	0.044915825	0.044	3376	tags=68%, list=49%, signal=129%
CHEN_HOXA5_TARGETS_UP	CHEN_HOXA5_TARGETS_UP	Details ...	116	-0.20407856	-2.5412128	0.0	0.044366546	0.088	2319	tags=53%, list=33%, signal=79%
GPCRS_CLASS_A_RHODOPSIN_LIKE	GPCRS_CLASS_A_RHODOPSIN_LIKE	Details ...	47	-0.30072278	-2.4639068	0.0	0.054017503	0.151	2507	tags=66%, list=36%, signal=103%
UVB_SCC_UP	UVB_SCC_UP	Details ...	45	-0.31446102	-2.450736	0.0	0.044217702	0.164	1535	tags=53%, list=22%, signal=68%
TRANSITION_METAL_ION_BINDING	TRANSITION_METAL_ION_BINDING	Details ...	42	-0.31000677	-2.3467095	0.0	0.08279226	0.346	3648	tags=83%, list=53%, signal=175%
ZINC_ION_BINDING	ZINC_ION_BINDING	Details ...	33	-0.32583982	-2.2427647	0.00390625	0.13130827	0.558	3641	tags=85%, list=52%, signal=178%
TAKEDA_NUP8_HOXA9_8D_UP	TAKEDA_NUP8_HOXA9_8D_UP	Details ...	67	-0.23381637	-2.2390802	0.0019493178	0.11589442	0.566	2746	tags=63%, list=40%, signal=103%
SANA_IFNG_ENDOTHELIAL_DN	SANA_IFNG_ENDOTHELIAL_DN	Details ...	30	-0.33643815	-2.1881351	0.001980198	0.14273569	0.701	3693	tags=87%, list=53%, signal=184%
BOQUEST_CD31PLUS_VS_CD31MINUS_UP	BOQUEST_CD31PLUS_VS_CD31MINUS_UP	Details ...	302	-0.107640296	-2.1515925	0.0	0.16169289	0.777	2942	tags=53%, list=42%, signal=87%
TAKEDA_NUP8_HOXA9_10D_UP	TAKEDA_NUP8_HOXA9_10D_UP	Details ...	86	-0.2012893	-2.1515033	0.0038387715	0.1455236	0.777	2900	tags=62%, list=42%, signal=105%
CARBOHYDRATE_BINDING	CARBOHYDRATE_BINDING	Details ...	28	-0.33285135	-2.114103	0.0019379845	0.16453242	0.842	3651	tags=86%, list=53%, signal=180%
GPCRDB_CLASS_A_RHODOPSIN_LIKE	GPCRDB_CLASS_A_RHODOPSIN_LIKE	Details ...	54	-0.23352146	-1.9882009	0.004158004	0.33065557	0.985	2507	tags=59%, list=36%, signal=92%
CATION_BINDING	CATION_BINDING	Details ...	75	-0.1969253	-1.971306	0.002008032	0.33847213	0.991	3648	tags=72%, list=53%, signal=150%
HDACI_COLON_SUL48HRS_UP	HDACI_COLON_SUL48HRS_UP	Details ...	46	-0.2459566	-1.9688811	0.008032128	0.31812432	0.992	3135	tags=70%, list=45%, signal=126%
UVC_XPCS_4HR_DN	UVC_XPCS_4HR_DN	Details ...	159	-0.13534854	-1.9295546	0.009823183	0.3722092	0.999	1441	tags=34%, list=21%, signal=42%
RESPONSE_TO_ENDOGENOUS_STIMULUS	RESPONSE_TO_ENDOGENOUS_STIMULUS	Details ...	83	-0.1756374	-1.9111485	0.010593221	0.3885948	0.999	4736	tags=86%, list=68%, signal=266%
LEUKOCYTE_ACTIVATION	LEUKOCYTE_ACTIVATION	Details ...	21	-0.34869277	-1.8842047	0.00811359	0.42313683	0.999	1555	tags=57%, list=22%, signal=73%
GH_GHRHR_KO_24HRS_DN	GH_GHRHR_KO_24HRS_DN	Details ...	84	-0.17410104	-1.8710622	0.012145749	0.42862764	1.0	2940	tags=60%, list=42%, signal=102%
TAKEDA_NUP8_HOXA9_6H_UP	TAKEDA_NUP8_HOXA9_6H_UP	Details ...	45	-0.23166642	-1.8610823	0.018292682	0.42674062	1.0	3495	tags=73%, list=50%, signal=147%
LEE_ACOX1_UP	LEE_ACOX1_UP	Details ...	18	-0.3622421	-1.8501158	0.020325202	0.4316703	1.0	2893	tags=78%, list=42%, signal=133%
EXTRACELLULAR_REGION	EXTRACELLULAR_REGION		151	-0.13131846	-1.8499383	0.01192843	0.41152513	1.0	2420	tags=48%, list=35%, signal=72%
RESPONSE_TO_DNA_DAMAGE_STIMULUS	RESPONSE_TO_DNA_DAMAGE_STIMULUS		64	-0.19491279	-1.8463633	0.0041067763	0.40044245	1.0	4736	tags=88%, list=68%, signal=273%
CIRCADIAN_EXERCISE	CIRCADIAN_EXERCISE		29	-0.28347173	-1.8410347	0.006012024	0.39324796	1.0	4027	tags=86%, list=58%, signal=204%
FSH_OVARY_MCV152_DN	FSH_OVARY_MCV152_DN		27	-0.29506475	-1.8400288	0.009784736	0.37856904	1.0	2075	tags=59%, list=30%, signal=84%
EXTRACELLULAR_REGION_PART	EXTRACELLULAR_REGION_PART		126	-0.13827771	-1.826047	0.008130081	0.39344338	1.0	2420	tags=48%, list=35%, signal=73%
UVB_NHEK1_C6	UVB_NHEK1_C6		86	-0.16634114	-1.8075857	0.02534113	0.41922176	1.0	2090	tags=47%, list=30%, signal=66%
LYMPHOCYTE_ACTIVATION	LYMPHOCYTE_ACTIVATION		19	-0.3371461	-1.7862415	0.019011406	0.45152318	1.0	1321	tags=53%, list=19%, signal=65%
LEE_CIP_DN	LEE_CIP_DN		21	-0.33193702	-1.7827226	0.021400778	0.44419774	1.0	1671	tags=57%, list=24%, signal=75%
YU_CMYC_DN	YU_CMYC_DN		19	-0.3334296	-1.754762	0.025291828	0.49688232	1.0	4636	tags=100%, list=67%, signal=300%
NUCLEAR_ENVELOPE	NUCLEAR_ENVELOPE		30	-0.2708128	-1.748356	0.029354207	0.49582404	1.0	2295	tags=60%, list=33%, signal=89%
BRCA1_OVEREXP_UP	BRCA1_OVEREXP_UP		83	-0.16374373	-1.7354311	0.017307693	0.51132953	1.0	3479	tags=66%, list=50%, signal=131%
TAKEDA_NUP8_HOXA9_3D_UP	TAKEDA_NUP8_HOXA9_3D_UP		84	-0.15952377	-1.7234917	0.026871402	0.5277433	1.0	1800	tags=42%, list=26%, signal=56%
DNA_DAMAGE_SIGNALING	DNA_DAMAGE_SIGNALING		37	-0.23796462	-1.7195152	0.02851711	0.5222446	1.0	4363	tags=86%, list=63%, signal=231%
CMV_HCMV_TIMECOURSE_18HRS_UP	CMV_HCMV_TIMECOURSE_18HRS_UP		47	-0.21083787	-1.7098372	0.022540983	0.5322699	1.0	1354	tags=40%, list=19%, signal=50%
CELL_ACTIVATION	CELL_ACTIVATION		23	-0.29893893	-1.7063426	0.029850746	0.5271856	1.0	1555	tags=52%, list=22%, signal=67%
HSA04080_NEUROACTIVE_LIGAND_RECEPTOR_INTERACTION	HSA04080_NEUROACTIVE_LIGAND_RECEPTOR_INTERACTION		83	-0.15908672	-1.7037926	0.023952097	0.5197129	1.0	2507	tags=52%, list=36%, signal=80%
ST_WNT_BETA_CATENIN_PATHWAY	ST_WNT_BETA_CATENIN_PATHWAY		15	-0.36485305	-1.6935421	0.017307693	0.5328128	1.0	3954	tags=93%, list=57%, signal=216%
CALCINEURIN_NF_AT_SIGNALING	CALCINEURIN_NF_AT_SIGNALING		31	-0.25763056	-1.6911334	0.035433073	0.5249149	1.0	4716	tags=94%, list=68%, signal=290%
GLUCONEOGENESIS	GLUCONEOGENESIS		18	-0.32725316	-1.6812981	0.029469548	0.5375864	1.0	1978	tags=61%, list=28%, signal=85%
MULTI_ORGANISM_PROCESS	MULTI_ORGANISM_PROCESS		50	-0.20410211	-1.67583	0.035051547	0.5387288	1.0	4288	tags=82%, list=62%, signal=213%
PASSERINI_EM	PASSERINI_EM		16	-0.34454387	-1.6693037	0.026209677	0.5424968	1.0	4124	tags=94%, list=59%, signal=230%
ALZHEIMERS_DISEASE_DN	ALZHEIMERS_DISEASE_DN		482	-0.06767428	-1.6659149	0.035490606	0.53881496	1.0	4145	tags=66%, list=60%, signal=152%
VERHAAK_AML_NPM1_MUT_VS_WT_DN	VERHAAK_AML_NPM1_MUT_VS_WT_DN		104	-0.14057577	-1.6649911	0.037383176	0.5287942	1.0	1777	tags=39%, list=26%, signal=52%
RECEPTOR_BINDING	RECEPTOR_BINDING		150	-0.114550084	-1.6613264	0.033797216	0.52595973	1.0	5102	tags=85%, list=73%, signal=312%
HSA00120_BILE_ACID_BIOSYNTHESIS	HSA00120_BILE_ACID_BIOSYNTHESIS		16	-0.34021363	-1.6526865	0.032945737	0.53714985	1.0	1984	tags=63%, list=29%, signal=87%
METAL_ION_TRANSPORT	METAL_ION_TRANSPORT		44	-0.20812908	-1.6525556	0.035643563	0.52579004	1.0	2826	tags=61%, list=41%, signal=103%
HSA00980_METABOLISM_OF_XENOBIOTICS_BY_CYTOCHROME_P450	HSA00980_METABOLISM_OF_XENOBIOTICS_BY_CYTOCHROME_P450		17	-0.32809383	-1.6486641	0.03258656	0.5251033	1.0	1813	tags=59%, list=26%, signal=79%
GLYCOLYSIS	GLYCOLYSIS		18	-0.32725316	-1.6445134	0.036585364	0.525536	1.0	1978	tags=61%, list=28%, signal=85%
RHODOPSIN_LIKE_RECEPTOR_ACTIVITY	RHODOPSIN_LIKE_RECEPTOR_ACTIVITY		36	-0.22878468	-1.6344146	0.030710172	0.54169583	1.0	2857	tags=64%, list=41%, signal=108%
TAKEDA_NUP8_HOXA9_16D_UP	TAKEDA_NUP8_HOXA9_16D_UP		71	-0.16532955	-1.6220924	0.041198503	0.5622312	1.0	2679	tags=55%, list=39%, signal=89%
EXTRACELLULAR_MATRIX	EXTRACELLULAR_MATRIX		52	-0.19020937	-1.6176918	0.033464566	0.5626944	1.0	3631	tags=71%, list=52%, signal=148%
GAMMA-UV_FIBRO_UP	GAMMA-UV_FIBRO_UP		16	-0.3394919	-1.6162361	0.049484536	0.55579644	1.0	2857	tags=75%, list=41%, signal=127%
CELL_SURFACE	CELL_SURFACE		36	-0.2272084	-1.6140174	0.028735632	0.5518766	1.0	2675	tags=61%, list=39%, signal=99%
GPCRDB_OTHER	GPCRDB_OTHER		20	-0.3014731	-1.6108296	0.052401748	0.5498855	1.0	2080	tags=60%, list=30%, signal=85%
ION_HOMEOSTASIS	ION_HOMEOSTASIS		49	-0.19535899	-1.6087809	0.03420523	0.5452993	1.0	2622	tags=57%, list=38%, signal=91%
CELL_CELL_SIGNALING	CELL_CELL_SIGNALING		148	-0.11091575	-1.6060892	0.041753653	0.54261637	1.0	1687	tags=35%, list=24%, signal=45%
HSA03022_BASAL_TRANSCRIPTION_FACTORS	HSA03022_BASAL_TRANSCRIPTION_FACTORS		15	-0.34392652	-1.5987076	0.047717843	0.55184907	1.0	4099	tags=93%, list=59%, signal=227%
MMS_MOUSE_LYMPH_HIGH_4HRS_UP	MMS_MOUSE_LYMPH_HIGH_4HRS_UP		22	-0.28147408	-1.5980227	0.026584867	0.5439183	1.0	1209	tags=45%, list=17%, signal=55%
PROTEINACEOUS_EXTRACELLULAR_MATRIX	PROTEINACEOUS_EXTRACELLULAR_MATRIX		52	-0.19020937	-1.5947776	0.056112226	0.54272234	1.0	3631	tags=71%, list=52%, signal=148%
CELL_JUNCTION	CELL_JUNCTION		35	-0.22799248	-1.5828204	0.05154639	0.56409067	1.0	2989	tags=66%, list=43%, signal=115%
CATION_TRANSPORT	CATION_TRANSPORT		54	-0.18410471	-1.582682	0.0546875	0.5551135	1.0	4262	tags=80%, list=61%, signal=205%
SERUM_FIBROBLAST_CELLCYCLE	SERUM_FIBROBLAST_CELLCYCLE		60	-0.16942666	-1.5775319	0.05102041	0.55970305	1.0	3464	tags=67%, list=50%, signal=132%
UVB_NHEK3_C8	UVB_NHEK3_C8		33	-0.22691539	-1.5711173	0.049407113	0.56694186	1.0	2010	tags=52%, list=29%, signal=72%
CHROMOSOME_ORGANIZATION_AND_BIOGENESIS	CHROMOSOME_ORGANIZATION_AND_BIOGENESIS		52	-0.18070002	-1.5671288	0.0501002	0.56825775	1.0	1827	tags=44%, list=26%, signal=60%
CELL_CELL_ADHESION	CELL_CELL_ADHESION		34	-0.22936071	-1.566015	0.048780486	0.5620195	1.0	3522	tags=74%, list=51%, signal=148%
LVAD_HEARTFAILURE_DN	LVAD_HEARTFAILURE_DN		19	-0.29451644	-1.5641178	0.04517454	0.5583023	1.0	4540	tags=95%, list=65%, signal=273%
CENTRAL_NERVOUS_SYSTEM_DEVELOPMENT	CENTRAL_NERVOUS_SYSTEM_DEVELOPMENT		47	-0.19176391	-1.5557705	0.062893085	0.57077897	1.0	2963	tags=62%, list=43%, signal=107%
WELCSH_BRCA_UP	WELCSH_BRCA_UP		25	-0.2606388	-1.5478624	0.05928854	0.58284855	1.0	1253	tags=44%, list=18%, signal=53%
CELLULAR_CATION_HOMEOSTASIS	CELLULAR_CATION_HOMEOSTASIS		46	-0.18902138	-1.5474265	0.05719921	0.5756757	1.0	2622	tags=57%, list=38%, signal=90%
NUCLEASE_ACTIVITY	NUCLEASE_ACTIVITY		18	-0.30326948	-1.547354	0.045360826	0.5675778	1.0	4073	tags=89%, list=59%, signal=214%
CYCLIC_NUCLEOTIDE_MEDIATED_SIGNALING	CYCLIC_NUCLEOTIDE_MEDIATED_SIGNALING		39	-0.20859282	-1.543238	0.05645161	0.56988233	1.0	3190	tags=67%, list=46%, signal=123%
BECKER_TAMOXIFEN_RESISTANT_DN	BECKER_TAMOXIFEN_RESISTANT_DN		31	-0.23115872	-1.5332707	0.07214429	0.588188	1.0	1987	tags=52%, list=29%, signal=72%
HADDAD_HPCLYMPHO_ENRICHED	HADDAD_HPCLYMPHO_ENRICHED		138	-0.11246466	-1.5332068	0.06849315	0.5802895	1.0	1198	tags=28%, list=17%, signal=33%
RIBAVIRIN_RSV_DN	RIBAVIRIN_RSV_DN		21	-0.27810678	-1.5280157	0.057654075	0.58579767	1.0	1713	tags=52%, list=25%, signal=69%
CELLULAR_HOMEOSTASIS	CELLULAR_HOMEOSTASIS		59	-0.166338	-1.5250908	0.058708414	0.58561885	1.0	2622	tags=54%, list=38%, signal=86%
TRANSLATIONAL_INITIATION	TRANSLATIONAL_INITIATION		16	-0.3146651	-1.52428	0.06903353	0.5800589	1.0	1293	tags=50%, list=19%, signal=61%
GH_AUTOCRINE_UP	GH_AUTOCRINE_UP		68	-0.15889029	-1.5242481	0.07613169	0.5726009	1.0	1972	tags=44%, list=28%, signal=61%
UVB_NHEK3_C2	UVB_NHEK3_C2		26	-0.2506282	-1.5193896	0.065476194	0.57777786	1.0	1205	tags=42%, list=17%, signal=51%
CMV_HCMV_TIMECOURSE_14HRS_DN	CMV_HCMV_TIMECOURSE_14HRS_DN		21	-0.27531415	-1.5193499	0.06666667	0.570513	1.0	2063	tags=57%, list=30%, signal=81%
ION_BINDING	ION_BINDING		100	-0.12919344	-1.5182241	0.065891474	0.5660188	1.0	2936	tags=55%, list=42%, signal=94%
PASSERINI_GROWTH	PASSERINI_GROWTH		19	-0.28448412	-1.5075063	0.067961164	0.5866029	1.0	4244	tags=89%, list=61%, signal=229%
REOVIRUS_HEK293_UP	REOVIRUS_HEK293_UP		143	-0.110844426	-1.5028245	0.061507937	0.5923944	1.0	1578	tags=34%, list=23%, signal=43%
BRAIN_DEVELOPMENT	BRAIN_DEVELOPMENT		22	-0.26985106	-1.502319	0.05566219	0.586658	1.0	2552	tags=64%, list=37%, signal=100%
EXTRACELLULAR_SPACE	EXTRACELLULAR_SPACE		75	-0.14807588	-1.4972411	0.068897635	0.5926333	1.0	5002	tags=87%, list=72%, signal=307%
CMV_HCMV_TIMECOURSE_16HRS_UP	CMV_HCMV_TIMECOURSE_16HRS_UP		24	-0.25939304	-1.494878	0.08793456	0.59206456	1.0	2546	tags=63%, list=37%, signal=98%
SYNAPTIC_TRANSMISSION	SYNAPTIC_TRANSMISSION		65	-0.15551232	-1.4843484	0.072407044	0.6137645	1.0	1602	tags=38%, list=23%, signal=50%
GLYCOGEN_METABOLISM	GLYCOGEN_METABOLISM		17	-0.29928073	-1.4836617	0.09375	0.6085259	1.0	3238	tags=76%, list=47%, signal=143%
HYPOXIA_REVIEW	HYPOXIA_REVIEW		36	-0.20454547	-1.4795963	0.08163265	0.6123101	1.0	2060	tags=50%, list=30%, signal=71%
POMEROY_DESMOPLASIC_VS_CLASSIC_MD_UP	POMEROY_DESMOPLASIC_VS_CLASSIC_MD_UP		17	-0.30151412	-1.470056	0.07569721	0.63159496	1.0	3631	tags=82%, list=52%, signal=172%
RESPONSE_TO_ABIOTIC_STIMULUS	RESPONSE_TO_ABIOTIC_STIMULUS		35	-0.20688957	-1.4667002	0.0754717	0.63429326	1.0	4722	tags=89%, list=68%, signal=275%
SANSOM_APC_LOSS5_UP	SANSOM_APC_LOSS5_UP		38	-0.196633	-1.4660072	0.09780439	0.6293324	1.0	2846	tags=61%, list=41%, signal=102%
NUCLEAR_MEMBRANE	NUCLEAR_MEMBRANE		21	-0.2631807	-1.4635401	0.078	0.62918	1.0	2147	tags=57%, list=31%, signal=82%
MYC_TARGETS	MYC_TARGETS		17	-0.2910351	-1.4595985	0.08737864	0.6329752	1.0	4929	tags=100%, list=71%, signal=344%
ADIPOGENESIS_HMSC_CLASS3_UP	ADIPOGENESIS_HMSC_CLASS3_UP		32	-0.21629052	-1.4569957	0.09631147	0.633123	1.0	1544	tags=44%, list=22%, signal=56%
DNA_REPAIR	DNA_REPAIR		51	-0.1760837	-1.4569153	0.07961165	0.62670356	1.0	4642	tags=84%, list=67%, signal=252%
POSITIVE_REGULATION_OF_IMMUNE_SYSTEM_PROCESS	POSITIVE_REGULATION_OF_IMMUNE_SYSTEM_PROCESS		19	-0.28437012	-1.4520895	0.09469697	0.63338774	1.0	1321	tags=47%, list=19%, signal=58%
CHROMATIN_MODIFICATION	CHROMATIN_MODIFICATION		23	-0.25963825	-1.4499704	0.08196721	0.6325838	1.0	1827	tags=52%, list=26%, signal=71%
GN_CAMP_GRANULOSA_UP	GN_CAMP_GRANULOSA_UP		24	-0.24749514	-1.4484644	0.08151093	0.6299514	1.0	1471	tags=46%, list=21%, signal=58%
ET743_SARCOMA_24HRS_DN	ET743_SARCOMA_24HRS_DN		52	-0.16989596	-1.447168	0.08695652	0.6271121	1.0	2035	tags=46%, list=29%, signal=65%
HSA00010_GLYCOLYSIS_AND_GLUCONEOGENESIS	HSA00010_GLYCOLYSIS_AND_GLUCONEOGENESIS		19	-0.28075242	-1.446146	0.091816366	0.6236487	1.0	2077	tags=58%, list=30%, signal=82%
YAO_P4_KO_VS_WT_UP	YAO_P4_KO_VS_WT_UP		28	-0.22874494	-1.4451389	0.10763209	0.620128	1.0	1891	tags=50%, list=27%, signal=68%
LE_MYELIN_DN	LE_MYELIN_DN		41	-0.1894475	-1.4366051	0.09054326	0.63594735	1.0	895	tags=32%, list=13%, signal=36%
AGEING_BRAIN_DN	AGEING_BRAIN_DN		65	-0.1493777	-1.4347637	0.09343936	0.6349076	1.0	3033	tags=58%, list=44%, signal=103%
G_PROTEIN_SIGNALING__COUPLED_TO_CYCLIC_NUCLEOTIDE_SECOND_MESSENGER	G_PROTEIN_SIGNALING__COUPLED_TO_CYCLIC_NUCLEOTIDE_SECOND_MESSENGER		38	-0.19974242	-1.4328272	0.092156865	0.63426775	1.0	3190	tags=66%, list=46%, signal=121%
KIM_TH_CELLS_UP	KIM_TH_CELLS_UP		30	-0.2216276	-1.4293988	0.11157025	0.6377853	1.0	3098	tags=67%, list=45%, signal=120%
CATION_HOMEOSTASIS	CATION_HOMEOSTASIS		47	-0.17694093	-1.425043	0.08541667	0.6434379	1.0	2622	tags=55%, list=38%, signal=88%
BAF57_BT549_DN	BAF57_BT549_DN		158	-0.097244106	-1.4220315	0.08884297	0.64543366	1.0	2901	tags=51%, list=42%, signal=86%
ROSS_MLL_FUSION	ROSS_MLL_FUSION		24	-0.24002889	-1.4183717	0.10831721	0.6491325	1.0	4416	tags=88%, list=64%, signal=240%
PATTERN_BINDING	PATTERN_BINDING		16	-0.28752887	-1.4167833	0.09607843	0.64717084	1.0	3651	tags=81%, list=53%, signal=171%
AGUIRRE_PANCREAS_CHR6	AGUIRRE_PANCREAS_CHR6		18	-0.2870183	-1.4120641	0.11067961	0.6541503	1.0	3414	tags=78%, list=49%, signal=153%
AGEING_KIDNEY_SPECIFIC_DN	AGEING_KIDNEY_SPECIFIC_DN		63	-0.14984895	-1.4088993	0.10735586	0.6569333	1.0	1505	tags=37%, list=22%, signal=46%
CHANG_SERUM_RESPONSE_UP	CHANG_SERUM_RESPONSE_UP		53	-0.1613124	-1.4077672	0.1184466	0.65427524	1.0	3082	tags=60%, list=44%, signal=108%
ROS_MOUSE_AORTA_DN	ROS_MOUSE_AORTA_DN		27	-0.23345594	-1.407093	0.08943089	0.6501752	1.0	5073	tags=96%, list=73%, signal=356%
AGEING_KIDNEY_DN	AGEING_KIDNEY_DN		60	-0.1513848	-1.4062035	0.099585064	0.6467637	1.0	1505	tags=37%, list=22%, signal=46%
GROWTH_FACTOR_ACTIVITY	GROWTH_FACTOR_ACTIVITY		18	-0.2785799	-1.4060332	0.09815951	0.64162385	1.0	4244	tags=89%, list=61%, signal=228%
YAGI_AML_PROG_FAB	YAGI_AML_PROG_FAB		85	-0.13076678	-1.4008605	0.095918365	0.64895594	1.0	2862	tags=54%, list=41%, signal=91%
REPRODUCTIVE_PROCESS	REPRODUCTIVE_PROCESS		54	-0.16456485	-1.3987627	0.10728745	0.6493515	1.0	4911	tags=87%, list=71%, signal=295%
ENVELOPE	ENVELOPE		53	-0.1637657	-1.3983393	0.11895161	0.64494836	1.0	2410	tags=51%, list=35%, signal=77%
ORGANELLE_ENVELOPE	ORGANELLE_ENVELOPE		53	-0.1637657	-1.3980799	0.09815951	0.64019305	1.0	2410	tags=51%, list=35%, signal=77%
HADDAD_HSC_CD7_UP	HADDAD_HSC_CD7_UP		18	-0.2726762	-1.3975997	0.12598425	0.63619095	1.0	2356	tags=61%, list=34%, signal=92%
TRANSLATION_FACTORS	TRANSLATION_FACTORS		15	-0.29631984	-1.3971776	0.10144927	0.6320705	1.0	3503	tags=80%, list=50%, signal=161%
SH3_SH2_ADAPTOR_ACTIVITY	SH3_SH2_ADAPTOR_ACTIVITY		16	-0.29027137	-1.390878	0.11619048	0.64284986	1.0	3632	tags=81%, list=52%, signal=170%
UVC_XPCS_ALL_DN	UVC_XPCS_ALL_DN		313	-0.06936155	-1.3892026	0.13320464	0.64195526	1.0	1449	tags=27%, list=21%, signal=33%
TPA_SENS_EARLY_DN	TPA_SENS_EARLY_DN		120	-0.10644779	-1.3886778	0.12896825	0.63796717	1.0	3441	tags=60%, list=50%, signal=117%
NEGATIVE_REGULATION_OF_APOPTOSIS	NEGATIVE_REGULATION_OF_APOPTOSIS		53	-0.16084146	-1.3861538	0.13717695	0.63959074	1.0	1382	tags=36%, list=20%, signal=44%
REGULATION_OF_TRANSLATION	REGULATION_OF_TRANSLATION		34	-0.19645871	-1.3812495	0.1124498	0.64771456	1.0	1707	tags=44%, list=25%, signal=58%
NUCLEAR_MEMBRANE_PART	NUCLEAR_MEMBRANE_PART		15	-0.2915861	-1.377833	0.116564415	0.6512561	1.0	2147	tags=60%, list=31%, signal=87%
HADDAD_CD45CD7_PLUS_VS_MINUS_UP	HADDAD_CD45CD7_PLUS_VS_MINUS_UP		18	-0.2726762	-1.376333	0.12927757	0.65003115	1.0	2356	tags=61%, list=34%, signal=92%
RESPONSE_TO_STRESS	RESPONSE_TO_STRESS		184	-0.08838435	-1.3748305	0.13347457	0.64895785	1.0	4687	tags=76%, list=67%, signal=228%
PHOSPHORIC_DIESTER_HYDROLASE_ACTIVITY	PHOSPHORIC_DIESTER_HYDROLASE_ACTIVITY		19	-0.25929698	-1.3741984	0.126	0.6454956	1.0	3322	tags=74%, list=48%, signal=141%
LEE_TCELLS10_UP	LEE_TCELLS10_UP		108	-0.1133108	-1.3722528	0.13137256	0.6458405	1.0	4563	tags=77%, list=66%, signal=221%
HSA00500_STARCH_AND_SUCROSE_METABOLISM	HSA00500_STARCH_AND_SUCROSE_METABOLISM		29	-0.21178849	-1.3709192	0.13559322	0.6445354	1.0	3086	tags=66%, list=44%, signal=117%
BEHAVIOR	BEHAVIOR		58	-0.1534548	-1.3702468	0.12256809	0.64138913	1.0	3853	tags=71%, list=55%, signal=157%
RESPONSE_TO_RADIATION	RESPONSE_TO_RADIATION		24	-0.23762041	-1.3637474	0.14541833	0.65383947	1.0	4722	tags=92%, list=68%, signal=285%
IDX_TSA_UP_CLUSTER6	IDX_TSA_UP_CLUSTER6		49	-0.16351396	-1.3611199	0.11881188	0.65579176	1.0	4117	tags=76%, list=59%, signal=184%
TRANSFERASE_ACTIVITY__TRANSFERRING_HEXOSYL_GROUPS	TRANSFERASE_ACTIVITY__TRANSFERRING_HEXOSYL_GROUPS		38	-0.1869694	-1.3608173	0.13899614	0.65178674	1.0	2730	tags=58%, list=39%, signal=95%
ESTABLISHMENT_AND_OR_MAINTENANCE_OF_CHROMATIN_ARCHITECTURE	ESTABLISHMENT_AND_OR_MAINTENANCE_OF_CHROMATIN_ARCHITECTURE		32	-0.2067419	-1.3586854	0.13492064	0.6521491	1.0	1827	tags=47%, list=26%, signal=63%
G_PROTEIN_SIGNALING__COUPLED_TO_CAMP_NUCLEOTIDE_SECOND_MESSENGER	G_PROTEIN_SIGNALING__COUPLED_TO_CAMP_NUCLEOTIDE_SECOND_MESSENGER		30	-0.20832126	-1.3579141	0.12804878	0.6494201	1.0	3190	tags=67%, list=46%, signal=123%
LEE_TCELLS8_UP	LEE_TCELLS8_UP		108	-0.1133108	-1.3569088	0.11354582	0.64743096	1.0	4563	tags=77%, list=66%, signal=221%
HADDAD_HSC_CD10_UP	HADDAD_HSC_CD10_UP		133	-0.10021711	-1.3567202	0.12695312	0.6433448	1.0	1198	tags=27%, list=17%, signal=32%
ST_T_CELL_SIGNAL_TRANSDUCTION	ST_T_CELL_SIGNAL_TRANSDUCTION		20	-0.25138643	-1.3566285	0.11890838	0.6390478	1.0	1038	tags=40%, list=15%, signal=47%
LH_GRANULOSA_UP	LH_GRANULOSA_UP		35	-0.19557099	-1.3565385	0.13779527	0.63480365	1.0	1229	tags=37%, list=18%, signal=45%
UVB_NHEK1_DN	UVB_NHEK1_DN		188	-0.08670941	-1.3563887	0.13265306	0.630764	1.0	1262	tags=27%, list=18%, signal=32%
LEE_TCELLS1_UP	LEE_TCELLS1_UP		108	-0.1133108	-1.3533068	0.15876289	0.63449436	1.0	4563	tags=77%, list=66%, signal=221%
SYSTEM_PROCESS	SYSTEM_PROCESS		190	-0.085691124	-1.3489845	0.12577319	0.641082	1.0	3479	tags=58%, list=50%, signal=114%
INTERCELLULAR_JUNCTION	INTERCELLULAR_JUNCTION		27	-0.21658927	-1.348134	0.13396226	0.6387708	1.0	2875	tags=63%, list=41%, signal=107%
MANALO_HYPOXIA_DN	MANALO_HYPOXIA_DN		34	-0.19229591	-1.3454356	0.13836478	0.6416026	1.0	5412	tags=97%, list=78%, signal=438%
CAMP_MEDIATED_SIGNALING	CAMP_MEDIATED_SIGNALING		30	-0.20832126	-1.3454049	0.13682093	0.6373401	1.0	3190	tags=67%, list=46%, signal=123%
GAY_YY1_DN	GAY_YY1_DN		112	-0.107874684	-1.3443923	0.14227642	0.6358189	1.0	4534	tags=76%, list=65%, signal=215%
SANA_IFNG_ENDOTHELIAL_UP	SANA_IFNG_ENDOTHELIAL_UP		20	-0.24508952	-1.3388344	0.12	0.64544624	1.0	3512	tags=75%, list=51%, signal=151%
ION_TRANSPORT	ION_TRANSPORT		69	-0.13872147	-1.3333642	0.1539961	0.6549872	1.0	4683	tags=81%, list=67%, signal=247%
HSA00150_ANDROGEN_AND_ESTROGEN_METABOLISM	HSA00150_ANDROGEN_AND_ESTROGEN_METABOLISM		15	-0.28826672	-1.329994	0.13813229	0.65940493	1.0	2170	tags=60%, list=31%, signal=87%
POSITIVE_REGULATION_OF_CELL_PROLIFERATION	POSITIVE_REGULATION_OF_CELL_PROLIFERATION		55	-0.15210284	-1.328129	0.1446281	0.6599765	1.0	1352	tags=35%, list=19%, signal=43%
DER_IFNA_UP	DER_IFNA_UP		29	-0.2066971	-1.3265232	0.15445544	0.65968776	1.0	4079	tags=79%, list=59%, signal=191%
CITED1_KO_HET_DN	CITED1_KO_HET_DN		21	-0.2449805	-1.3263688	0.14648438	0.6557854	1.0	1281	tags=43%, list=18%, signal=52%
TAKEDA_NUP8_HOXA9_10D_DN	TAKEDA_NUP8_HOXA9_10D_DN		58	-0.14864244	-1.324649	0.13457943	0.6558034	1.0	2210	tags=47%, list=32%, signal=68%
HSA03320_PPAR_SIGNALING_PATHWAY	HSA03320_PPAR_SIGNALING_PATHWAY		28	-0.20965876	-1.3203925	0.14629258	0.6625592	1.0	4255	tags=82%, list=61%, signal=211%
POMEROY_DESMOPLASIC_VS_CLASSIC_MD_DN	POMEROY_DESMOPLASIC_VS_CLASSIC_MD_DN		16	-0.27655888	-1.3190802	0.15116279	0.6616961	1.0	1991	tags=56%, list=29%, signal=79%
HDACI_COLON_SUL_UP	HDACI_COLON_SUL_UP		62	-0.14632374	-1.3181427	0.15090543	0.659651	1.0	3138	tags=60%, list=45%, signal=108%
SMALL_CONJUGATING_PROTEIN_LIGASE_ACTIVITY	SMALL_CONJUGATING_PROTEIN_LIGASE_ACTIVITY		27	-0.20706365	-1.3177037	0.16016427	0.6565995	1.0	4484	tags=85%, list=65%, signal=240%
MOLECULAR_ADAPTOR_ACTIVITY	MOLECULAR_ADAPTOR_ACTIVITY		21	-0.2397323	-1.3141716	0.18003914	0.66184443	1.0	3632	tags=76%, list=52%, signal=159%
MONOVALENT_INORGANIC_CATION_TRANSPORT	MONOVALENT_INORGANIC_CATION_TRANSPORT		28	-0.20864663	-1.3103698	0.16352202	0.6676317	1.0	4262	tags=82%, list=61%, signal=212%
HSC_LATEPROGENITORS_FETAL	HSC_LATEPROGENITORS_FETAL		204	-0.07761678	-1.3013681	0.16734694	0.6868845	1.0	2201	tags=39%, list=32%, signal=56%
NEGATIVE_REGULATION_OF_PROGRAMMED_CELL_DEATH	NEGATIVE_REGULATION_OF_PROGRAMMED_CELL_DEATH		54	-0.15417403	-1.2976685	0.16046967	0.692092	1.0	1382	tags=35%, list=20%, signal=44%
DOUBLE_STRANDED_DNA_BINDING	DOUBLE_STRANDED_DNA_BINDING		15	-0.28114688	-1.2974731	0.18590999	0.68838376	1.0	4534	tags=93%, list=65%, signal=268%
FSH_GRANULOSA_UP	FSH_GRANULOSA_UP		33	-0.187685	-1.2937558	0.15481171	0.6939044	1.0	1229	tags=36%, list=18%, signal=44%
ET743_SARCOMA_72HRS_DN	ET743_SARCOMA_72HRS_DN		111	-0.105162635	-1.2932016	0.14757282	0.69126594	1.0	2035	tags=40%, list=29%, signal=55%
LEE_CIP_UP	LEE_CIP_UP		21	-0.23684336	-1.2917236	0.16837782	0.6908034	1.0	676	tags=33%, list=10%, signal=37%
YU_CMYC_UP	YU_CMYC_UP		15	-0.27181414	-1.291574	0.16334662	0.6870949	1.0	2284	tags=60%, list=33%, signal=89%
VEGF_MMMEC_6HRS_UP	VEGF_MMMEC_6HRS_UP		19	-0.2505491	-1.2891576	0.1838843	0.68919545	1.0	4479	tags=89%, list=65%, signal=251%
TRANSMISSION_OF_NERVE_IMPULSE	TRANSMISSION_OF_NERVE_IMPULSE		70	-0.12993887	-1.2883799	0.17584746	0.6871175	1.0	1687	tags=37%, list=24%, signal=49%
GREENBAUM_E2A_UP	GREENBAUM_E2A_UP		16	-0.2638568	-1.2862569	0.16359918	0.68857145	1.0	2079	tags=56%, list=30%, signal=80%
LEE_ACOX1_DN	LEE_ACOX1_DN		20	-0.23801267	-1.2847345	0.15882353	0.6887307	1.0	1825	tags=50%, list=26%, signal=68%
ZUCCHI_EPITHELIAL_UP	ZUCCHI_EPITHELIAL_UP		15	-0.2748641	-1.2817168	0.16421053	0.6927953	1.0	1337	tags=47%, list=19%, signal=58%
HSA04330_NOTCH_SIGNALING_PATHWAY	HSA04330_NOTCH_SIGNALING_PATHWAY		20	-0.24159443	-1.2802165	0.17988394	0.69264936	1.0	3189	tags=70%, list=46%, signal=129%
IFNA_HCMV_6HRS_UP	IFNA_HCMV_6HRS_UP		25	-0.21562652	-1.2791256	0.20116054	0.6914374	1.0	3231	tags=68%, list=47%, signal=127%
VEGF_MMMEC_ALL_UP	VEGF_MMMEC_ALL_UP		31	-0.19470564	-1.2785617	0.17684211	0.68892497	1.0	4479	tags=84%, list=65%, signal=235%
H2O2_CSBRESCUED_UP	H2O2_CSBRESCUED_UP		22	-0.22967613	-1.2760737	0.178	0.691187	1.0	3777	tags=77%, list=54%, signal=169%
UVB_NHEK3_C0	UVB_NHEK3_C0		40	-0.17392814	-1.2759495	0.18307087	0.687679	1.0	4529	tags=83%, list=65%, signal=236%
HSC_LATEPROGENITORS_SHARED	HSC_LATEPROGENITORS_SHARED		204	-0.07761678	-1.2734761	0.18674698	0.68997234	1.0	2201	tags=39%, list=32%, signal=56%
RESPONSE_TO_HORMONE_STIMULUS	RESPONSE_TO_HORMONE_STIMULUS		17	-0.2609567	-1.2713562	0.1782364	0.69195396	1.0	3095	tags=71%, list=45%, signal=127%
HSA04530_TIGHT_JUNCTION	HSA04530_TIGHT_JUNCTION		54	-0.14823951	-1.2709845	0.18072289	0.68902993	1.0	2966	tags=57%, list=43%, signal=99%
CYTOKINE_ACTIVITY	CYTOKINE_ACTIVITY		45	-0.1650513	-1.2690717	0.19456068	0.6900754	1.0	5652	tags=98%, list=81%, signal=522%
LIGASE_ACTIVITY__FORMING_CARBON_NITROGEN_BONDS	LIGASE_ACTIVITY__FORMING_CARBON_NITROGEN_BONDS		36	-0.18011324	-1.2628847	0.17490494	0.7023327	1.0	3579	tags=69%, list=52%, signal=143%
TRANSFERASE_ACTIVITY__TRANSFERRING_GLYCOSYL_GROUPS	TRANSFERASE_ACTIVITY__TRANSFERRING_GLYCOSYL_GROUPS		49	-0.15408684	-1.2619889	0.18664047	0.7007266	1.0	2198	tags=47%, list=32%, signal=68%
HSA00620_PYRUVATE_METABOLISM	HSA00620_PYRUVATE_METABOLISM		18	-0.25562292	-1.2567807	0.19838056	0.7109547	1.0	4403	tags=89%, list=63%, signal=242%
CHEMICAL_HOMEOSTASIS	CHEMICAL_HOMEOSTASIS		58	-0.14097069	-1.2490548	0.19438878	0.72721636	1.0	2622	tags=52%, list=38%, signal=82%
CELLULAR_MACROMOLECULE_CATABOLIC_PROCESS	CELLULAR_MACROMOLECULE_CATABOLIC_PROCESS		43	-0.16196842	-1.2426395	0.21529175	0.74074364	1.0	2436	tags=51%, list=35%, signal=78%
SRC_ONCOGENIC_SIGNATURE	SRC_ONCOGENIC_SIGNATURE		34	-0.17803697	-1.241734	0.19753087	0.7390633	1.0	2447	tags=53%, list=35%, signal=81%
ET743_SARCOMA_72HRS_UP	ET743_SARCOMA_72HRS_UP		22	-0.21719944	-1.240626	0.1910569	0.7382007	1.0	4179	tags=82%, list=60%, signal=205%
REGULATION_OF_BINDING	REGULATION_OF_BINDING		23	-0.22199605	-1.240499	0.21113244	0.73462677	1.0	3899	tags=78%, list=56%, signal=178%
UVB_NHEK1_UP	UVB_NHEK1_UP		51	-0.14765759	-1.2404926	0.1904762	0.73080546	1.0	4021	tags=73%, list=58%, signal=171%
POSITIVE_REGULATION_OF_RESPONSE_TO_STIMULUS	POSITIVE_REGULATION_OF_RESPONSE_TO_STIMULUS		17	-0.24740359	-1.2366983	0.20612244	0.7373779	1.0	1555	tags=47%, list=22%, signal=60%
ASTON_DEPRESSION_DN	ASTON_DEPRESSION_DN		78	-0.11700167	-1.2354741	0.21095334	0.73685133	1.0	3827	tags=67%, list=55%, signal=147%
REGULATION_OF_IMMUNE_SYSTEM_PROCESS	REGULATION_OF_IMMUNE_SYSTEM_PROCESS		22	-0.21969476	-1.2346272	0.19019608	0.73539734	1.0	1321	tags=41%, list=19%, signal=50%
PROTEIN_BINDING__BRIDGING	PROTEIN_BINDING__BRIDGING		20	-0.23316	-1.2342111	0.21673004	0.7327939	1.0	4289	tags=85%, list=62%, signal=222%
IFN_ALPHA_UP	IFN_ALPHA_UP		21	-0.2229284	-1.2325219	0.20898438	0.7335384	1.0	4079	tags=81%, list=59%, signal=196%
SECOND_MESSENGER_MEDIATED_SIGNALING	SECOND_MESSENGER_MEDIATED_SIGNALING		57	-0.13838175	-1.2322676	0.20472442	0.73045576	1.0	3190	tags=60%, list=46%, signal=109%
UVB_NHEK3_ALL	UVB_NHEK3_ALL		170	-0.080756895	-1.2316374	0.1961165	0.72864664	1.0	1578	tags=31%, list=23%, signal=39%
LI_FETAL_VS_WT_KIDNEY_DN	LI_FETAL_VS_WT_KIDNEY_DN		76	-0.119639516	-1.2243456	0.1959596	0.7442305	1.0	5301	tags=88%, list=76%, signal=369%
POSITIVE_REGULATION_OF_CELLULAR_PROTEIN_METABOLIC_PROCESS	POSITIVE_REGULATION_OF_CELLULAR_PROTEIN_METABOLIC_PROCESS		27	-0.19578171	-1.2242577	0.21928166	0.7407459	1.0	1733	tags=44%, list=25%, signal=59%
H2O2_CSBRESCUED_C1_UP	H2O2_CSBRESCUED_C1_UP		18	-0.23717391	-1.2214417	0.23360656	0.74440295	1.0	4145	tags=83%, list=60%, signal=206%
INTRINSIC_TO_MEMBRANE	INTRINSIC_TO_MEMBRANE		491	-0.049026236	-1.2206595	0.20781893	0.7427796	1.0	2697	tags=43%, list=39%, signal=66%
HDACI_COLON_SUL16HRS_UP	HDACI_COLON_SUL16HRS_UP		21	-0.22177283	-1.2203871	0.22267206	0.7396968	1.0	2103	tags=52%, list=30%, signal=75%
DOX_RESIST_GASTRIC_UP	DOX_RESIST_GASTRIC_UP		15	-0.25736278	-1.2197168	0.23279352	0.73785096	1.0	3310	tags=73%, list=48%, signal=140%
UBIQUITIN_PROTEIN_LIGASE_ACTIVITY	UBIQUITIN_PROTEIN_LIGASE_ACTIVITY		26	-0.20131429	-1.2186432	0.22222222	0.7368136	1.0	4484	tags=85%, list=65%, signal=238%
HSC_LATEPROGENITORS_ADULT	HSC_LATEPROGENITORS_ADULT		207	-0.071793295	-1.217333	0.22286822	0.73683167	1.0	2201	tags=39%, list=32%, signal=55%
SMALL_PROTEIN_CONJUGATING_ENZYME_ACTIVITY	SMALL_PROTEIN_CONJUGATING_ENZYME_ACTIVITY		26	-0.20131429	-1.2138685	0.21001926	0.7420903	1.0	4484	tags=85%, list=65%, signal=238%
WANG_HOXA9_VS_MEIS1_UP	WANG_HOXA9_VS_MEIS1_UP		16	-0.2510104	-1.2112216	0.22384937	0.7455872	1.0	866	tags=38%, list=12%, signal=43%
G_PROTEIN_COUPLED_RECEPTOR_BINDING	G_PROTEIN_COUPLED_RECEPTOR_BINDING		26	-0.20121422	-1.209448	0.21497121	0.7467419	1.0	5553	tags=100%, list=80%, signal=497%
POSITIVE_REGULATION_OF_PROTEIN_METABOLIC_PROCESS	POSITIVE_REGULATION_OF_PROTEIN_METABOLIC_PROCESS		27	-0.19578171	-1.2092069	0.24361493	0.74385345	1.0	1733	tags=44%, list=25%, signal=59%
GLYCEROLIPID_METABOLISM	GLYCEROLIPID_METABOLISM		17	-0.24530609	-1.2090169	0.2165992	0.7407712	1.0	1978	tags=53%, list=28%, signal=74%
CELL_CYCLE_PROCESS	CELL_CYCLE_PROCESS		87	-0.11157153	-1.2077428	0.23446894	0.74064744	1.0	4424	tags=75%, list=64%, signal=203%
PROTEIN_COMPLEX_BINDING	PROTEIN_COMPLEX_BINDING		23	-0.20306815	-1.2062927	0.24236253	0.7410079	1.0	4030	tags=78%, list=58%, signal=186%
IGLESIAS_E2FMINUS_UP	IGLESIAS_E2FMINUS_UP		61	-0.13099039	-1.2060366	0.21472393	0.73826236	1.0	3539	tags=64%, list=51%, signal=129%
NEUROLOGICAL_SYSTEM_PROCESS	NEUROLOGICAL_SYSTEM_PROCESS		136	-0.089116596	-1.2059567	0.2475442	0.7350496	1.0	3479	tags=59%, list=50%, signal=116%
ANTI_APOPTOSIS	ANTI_APOPTOSIS		47	-0.14686309	-1.2050653	0.21052632	0.7339976	1.0	1352	tags=34%, list=19%, signal=42%
RCC_NL_UP	RCC_NL_UP		243	-0.06906902	-1.2035712	0.23613963	0.7346005	1.0	2853	tags=48%, list=41%, signal=78%
STOSSI_ER_UP	STOSSI_ER_UP		24	-0.20183042	-1.2031891	0.21782178	0.7321048	1.0	1787	tags=46%, list=26%, signal=62%
HDACI_COLON_CUR_DN	HDACI_COLON_CUR_DN		26	-0.1939978	-1.202972	0.21442495	0.729364	1.0	2398	tags=54%, list=35%, signal=82%
MICROBODY	MICROBODY		18	-0.23151086	-1.2025671	0.21721311	0.7271892	1.0	1098	tags=39%, list=16%, signal=46%
GAY_YY1_UP	GAY_YY1_UP		84	-0.11341106	-1.2013955	0.23062381	0.72694284	1.0	4927	tags=82%, list=71%, signal=279%
RIBONUCLEOPROTEIN_COMPLEX	RIBONUCLEOPROTEIN_COMPLEX		47	-0.14786261	-1.1965394	0.21917808	0.73627245	1.0	4300	tags=77%, list=62%, signal=200%
INTEGRAL_TO_MEMBRANE	INTEGRAL_TO_MEMBRANE		486	-0.047149863	-1.1963073	0.22986248	0.7335447	1.0	2697	tags=43%, list=39%, signal=66%
POSITIVE_REGULATION_OF_MULTICELLULAR_ORGANISMAL_PROCESS	POSITIVE_REGULATION_OF_MULTICELLULAR_ORGANISMAL_PROCESS		26	-0.19512083	-1.1933285	0.24634655	0.7379287	1.0	1589	tags=42%, list=23%, signal=55%
CYTOSKELETAL_PROTEIN_BINDING	CYTOSKELETAL_PROTEIN_BINDING		75	-0.11489298	-1.193004	0.23952095	0.7355311	1.0	4767	tags=80%, list=69%, signal=252%
UVC_TTD_4HR_DN	UVC_TTD_4HR_DN		207	-0.0728309	-1.1897249	0.24081632	0.74091274	1.0	1456	tags=28%, list=21%, signal=34%
IGF1_NIH3T3_UP	IGF1_NIH3T3_UP		17	-0.23978634	-1.1872623	0.23781677	0.7438036	1.0	5284	tags=100%, list=76%, signal=417%
ALCALAY_AML_NPMC_DN	ALCALAY_AML_NPMC_DN		77	-0.113348424	-1.1856697	0.23541248	0.74458236	1.0	4363	tags=74%, list=63%, signal=197%
NEGATIVE_REGULATION_OF_SIGNAL_TRANSDUCTION	NEGATIVE_REGULATION_OF_SIGNAL_TRANSDUCTION		15	-0.25824794	-1.1854964	0.21756487	0.74178916	1.0	2378	tags=60%, list=34%, signal=91%
STRUCTURAL_MOLECULE_ACTIVITY	STRUCTURAL_MOLECULE_ACTIVITY		59	-0.12803808	-1.1748394	0.24710424	0.7654396	1.0	2768	tags=53%, list=40%, signal=87%
MICROTUBULE_BASED_PROCESS	MICROTUBULE_BASED_PROCESS		35	-0.17035751	-1.173368	0.26147705	0.76603675	1.0	3784	tags=71%, list=54%, signal=156%
LEE_E2F1_UP	LEE_E2F1_UP		23	-0.20821945	-1.1710845	0.26653695	0.7686016	1.0	5202	tags=96%, list=75%, signal=380%
ELECTRON_CARRIER_ACTIVITY	ELECTRON_CARRIER_ACTIVITY		24	-0.19961463	-1.1691777	0.2644628	0.7703337	1.0	4117	tags=79%, list=59%, signal=194%
TUBULIN_BINDING	TUBULIN_BINDING		20	-0.21871747	-1.1685205	0.25211865	0.7688068	1.0	2653	tags=60%, list=38%, signal=97%
PROTEIN_TYROSINE_PHOSPHATASE_ACTIVITY	PROTEIN_TYROSINE_PHOSPHATASE_ACTIVITY		26	-0.19425353	-1.1682066	0.26838967	0.7665203	1.0	1595	tags=42%, list=23%, signal=55%
SERUM_FIBROBLAST_CORE_UP	SERUM_FIBROBLAST_CORE_UP		76	-0.11351654	-1.1643763	0.27572018	0.77330947	1.0	4338	tags=74%, list=62%, signal=194%
VEGF_MMMEC_3HRS_UP	VEGF_MMMEC_3HRS_UP		20	-0.21747541	-1.1641824	0.2642998	0.770496	1.0	1620	tags=45%, list=23%, signal=59%
REPRODUCTION	REPRODUCTION		89	-0.10545079	-1.1637735	0.27868852	0.76836675	1.0	5754	tags=93%, list=83%, signal=537%
TRANSCRIPTION_FACTOR_COMPLEX	TRANSCRIPTION_FACTOR_COMPLEX		42	-0.15396506	-1.1628584	0.28189301	0.7674904	1.0	3733	tags=69%, list=54%, signal=148%
LINDSTEDT_DEND_8H_VS_48H_UP	LINDSTEDT_DEND_8H_VS_48H_UP		36	-0.16536385	-1.1616654	0.26587301	0.7674528	1.0	1752	tags=42%, list=25%, signal=55%
LEE_TCELLS9_UP	LEE_TCELLS9_UP		16	-0.23542148	-1.159389	0.25155926	0.77017045	1.0	3578	tags=75%, list=52%, signal=154%
AGED_RHESUS_DN	AGED_RHESUS_DN		36	-0.16521907	-1.158905	0.24712643	0.7682926	1.0	5225	tags=92%, list=75%, signal=368%
KUROKAWA_5FU_IFN_SENSITIVE_VS_RESISTANT_DN	KUROKAWA_5FU_IFN_SENSITIVE_VS_RESISTANT_DN		15	-0.24786647	-1.1555759	0.26968503	0.77387476	1.0	1987	tags=53%, list=29%, signal=75%
TRANSLATION_REGULATOR_ACTIVITY	TRANSLATION_REGULATOR_ACTIVITY		19	-0.21946417	-1.1534516	0.26666668	0.7761758	1.0	1405	tags=42%, list=20%, signal=53%
HYDROLASE_ACTIVITY__ACTING_ON_ESTER_BONDS	HYDROLASE_ACTIVITY__ACTING_ON_ESTER_BONDS		113	-0.09327339	-1.153144	0.28177965	0.77375954	1.0	1699	tags=34%, list=24%, signal=44%
TSADAC_HYPOMETH_OVCA_UP	TSADAC_HYPOMETH_OVCA_UP		25	-0.19281974	-1.1524603	0.28333333	0.77229756	1.0	2000	tags=48%, list=29%, signal=67%
PEROXISOME	PEROXISOME		18	-0.23151086	-1.1518571	0.27767354	0.77082294	1.0	1098	tags=39%, list=16%, signal=46%
UVC_TTD_ALL_DN	UVC_TTD_ALL_DN		248	-0.06332138	-1.1516317	0.25235406	0.7683354	1.0	2125	tags=37%, list=31%, signal=51%
TRANSPORT_VESICLE	TRANSPORT_VESICLE		19	-0.22296028	-1.1488925	0.2901961	0.7724526	1.0	5401	tags=100%, list=78%, signal=449%
HSA04610_COMPLEMENT_AND_COAGULATION_CASCADES	HSA04610_COMPLEMENT_AND_COAGULATION_CASCADES		27	-0.18171011	-1.1472187	0.25	0.77390945	1.0	4145	tags=78%, list=60%, signal=192%
CELL_SUBSTRATE_ADHESION	CELL_SUBSTRATE_ADHESION		17	-0.225953	-1.146813	0.27920792	0.77189595	1.0	2929	tags=65%, list=42%, signal=112%
INORGANIC_CATION_TRANSMEMBRANE_TRANSPORTER_ACTIVITY	INORGANIC_CATION_TRANSMEMBRANE_TRANSPORTER_ACTIVITY		28	-0.17943898	-1.1452895	0.27145708	0.7728666	1.0	3224	tags=64%, list=46%, signal=120%
TRANSLATION_FACTOR_ACTIVITY__NUCLEIC_ACID_BINDING	TRANSLATION_FACTOR_ACTIVITY__NUCLEIC_ACID_BINDING		19	-0.21946417	-1.1452578	0.2877551	0.7699041	1.0	1405	tags=42%, list=20%, signal=53%
CMV_HCMV_TIMECOURSE_ALL_UP	CMV_HCMV_TIMECOURSE_ALL_UP		231	-0.06485382	-1.1447713	0.26666668	0.7681586	1.0	738	tags=17%, list=11%, signal=18%
ATPASE_ACTIVITY__COUPLED	ATPASE_ACTIVITY__COUPLED		41	-0.15206538	-1.1438178	0.27755103	0.7675855	1.0	4371	tags=78%, list=63%, signal=209%
HSA00071_FATTY_ACID_METABOLISM	HSA00071_FATTY_ACID_METABOLISM		23	-0.19785403	-1.1418262	0.27235773	0.7694979	1.0	4368	tags=83%, list=63%, signal=222%
HSIAO_LIVER_SPECIFIC_GENES	HSIAO_LIVER_SPECIFIC_GENES		71	-0.11431343	-1.1415823	0.3057199	0.7671538	1.0	1856	tags=38%, list=27%, signal=51%
P21_P53_ANY_DN	P21_P53_ANY_DN		23	-0.20073122	-1.1410455	0.27095518	0.7655281	1.0	4650	tags=87%, list=67%, signal=262%
REGULATION_OF_RESPONSE_TO_STIMULUS	REGULATION_OF_RESPONSE_TO_STIMULUS		21	-0.20540227	-1.1378638	0.2990099	0.7709868	1.0	1555	tags=43%, list=22%, signal=55%
CELL_CYCLE_GO_0007049	CELL_CYCLE_GO_0007049		129	-0.08661923	-1.135523	0.29182878	0.77401227	1.0	4363	tags=71%, list=63%, signal=188%
UVC_XPCS_8HR_DN	UVC_XPCS_8HR_DN		263	-0.059903152	-1.1342058	0.29341316	0.77438223	1.0	1449	tags=27%, list=21%, signal=32%
SPINDLE	SPINDLE		16	-0.23354504	-1.1340318	0.29957807	0.7718963	1.0	4459	tags=88%, list=64%, signal=244%
OXIDOREDUCTASE_ACTIVITY__ACTING_ON_CH_OH_GROUP_OF_DONORS	OXIDOREDUCTASE_ACTIVITY__ACTING_ON_CH_OH_GROUP_OF_DONORS		16	-0.23874134	-1.1337173	0.29896906	0.76969856	1.0	1385	tags=44%, list=20%, signal=55%
HSA04060_CYTOKINE_CYTOKINE_RECEPTOR_INTERACTION	HSA04060_CYTOKINE_CYTOKINE_RECEPTOR_INTERACTION		96	-0.09803348	-1.1302783	0.27926078	0.77559155	1.0	5695	tags=92%, list=82%, signal=503%
HOHENKIRK_MONOCYTE_DEND_DN	HOHENKIRK_MONOCYTE_DEND_DN		45	-0.14485835	-1.1292381	0.3220676	0.7754478	1.0	5637	tags=96%, list=81%, signal=504%
CHEMOKINE_RECEPTOR_BINDING	CHEMOKINE_RECEPTOR_BINDING		22	-0.20109795	-1.1283098	0.2895277	0.7747902	1.0	5553	tags=100%, list=80%, signal=498%
STRUCTURE_SPECIFIC_DNA_BINDING	STRUCTURE_SPECIFIC_DNA_BINDING		22	-0.19696094	-1.125972	0.27952754	0.77785903	1.0	5266	tags=95%, list=76%, signal=394%
CIS_XPC_DN	CIS_XPC_DN		88	-0.10155668	-1.124361	0.28490567	0.77915025	1.0	804	tags=22%, list=12%, signal=24%
GUO_HEX_DN	GUO_HEX_DN		23	-0.19577464	-1.1175967	0.32317072	0.79312074	1.0	2269	tags=52%, list=33%, signal=77%
PEPTIDE_GPCRS	PEPTIDE_GPCRS		19	-0.21092153	-1.1140609	0.31643003	0.7988772	1.0	3657	tags=74%, list=53%, signal=155%
AGED_MOUSE_HIPPOCAMPUS_ANY_DN	AGED_MOUSE_HIPPOCAMPUS_ANY_DN		25	-0.18826996	-1.11382	0.29051384	0.7966242	1.0	2587	tags=56%, list=37%, signal=89%
INSULIN_SIGNALING	INSULIN_SIGNALING		34	-0.16011749	-1.1124636	0.31287128	0.7971977	1.0	3592	tags=68%, list=52%, signal=139%
CARIES_PULP_DN	CARIES_PULP_DN		42	-0.14232591	-1.1114339	0.30753967	0.7969497	1.0	3152	tags=60%, list=45%, signal=108%
G_PROTEIN_COUPLED_RECEPTOR_ACTIVITY	G_PROTEIN_COUPLED_RECEPTOR_ACTIVITY		57	-0.12505892	-1.1102866	0.306163	0.796928	1.0	4500	tags=77%, list=65%, signal=218%
BASSO_GERMINAL_CENTER_CD40_UP	BASSO_GERMINAL_CENTER_CD40_UP		36	-0.14931159	-1.1100394	0.2987805	0.79474646	1.0	5142	tags=89%, list=74%, signal=341%
ZHAN_MM_CD138_CD2_VS_REST	ZHAN_MM_CD138_CD2_VS_REST		20	-0.20288847	-1.1081731	0.33005893	0.79656744	1.0	1721	tags=45%, list=25%, signal=60%
CHEMOKINE_ACTIVITY	CHEMOKINE_ACTIVITY		21	-0.20106891	-1.1070555	0.31300813	0.79665273	1.0	5553	tags=100%, list=80%, signal=498%
ASTIER_BCELL	ASTIER_BCELL		16	-0.2224307	-1.1032712	0.3106796	0.8032581	1.0	4102	tags=81%, list=59%, signal=198%
HSA04512_ECM_RECEPTOR_INTERACTION	HSA04512_ECM_RECEPTOR_INTERACTION		37	-0.15475486	-1.1029677	0.3091603	0.8011049	1.0	3624	tags=68%, list=52%, signal=141%
TPA_SENS_EARLY_UP	TPA_SENS_EARLY_UP		22	-0.19425546	-1.097916	0.3	0.8115049	1.0	2444	tags=55%, list=35%, signal=84%
NEGATIVE_REGULATION_OF_RNA_METABOLIC_PROCESS	NEGATIVE_REGULATION_OF_RNA_METABOLIC_PROCESS		70	-0.10957227	-1.0945055	0.3508772	0.81744176	1.0	1827	tags=37%, list=26%, signal=50%
CELL_MATRIX_ADHESION	CELL_MATRIX_ADHESION		17	-0.225953	-1.0936251	0.32871288	0.8168947	1.0	2929	tags=65%, list=42%, signal=112%
NEGATIVE_REGULATION_OF_DEVELOPMENTAL_PROCESS	NEGATIVE_REGULATION_OF_DEVELOPMENTAL_PROCESS		75	-0.10838449	-1.0925012	0.33333334	0.8168565	1.0	1386	tags=31%, list=20%, signal=38%
PEART_HISTONE_DN	PEART_HISTONE_DN		31	-0.16852309	-1.0861006	0.3313253	0.8306729	1.0	4212	tags=77%, list=61%, signal=196%
LOCOMOTORY_BEHAVIOR	LOCOMOTORY_BEHAVIOR		41	-0.14230646	-1.0827463	0.35477582	0.83666563	1.0	4269	tags=76%, list=61%, signal=195%
ST_MYOCYTE_AD_PATHWAY	ST_MYOCYTE_AD_PATHWAY		15	-0.22920096	-1.078298	0.3668763	0.8452779	1.0	4431	tags=87%, list=64%, signal=239%
ET743PT650_COLONCA_DN	ET743PT650_COLONCA_DN		30	-0.1657024	-1.0750675	0.35528943	0.8507417	1.0	1170	tags=33%, list=17%, signal=40%
ACID_AMINO_ACID_LIGASE_ACTIVITY	ACID_AMINO_ACID_LIGASE_ACTIVITY		31	-0.16288155	-1.0734413	0.3429752	0.85188174	1.0	3579	tags=68%, list=52%, signal=139%
ZUCCHI_EPITHELIAL_DN	ZUCCHI_EPITHELIAL_DN		17	-0.21258672	-1.0694848	0.36653388	0.8594876	1.0	4247	tags=82%, list=61%, signal=212%
CARIES_PULP_HIGH_UP	CARIES_PULP_HIGH_UP		29	-0.16724764	-1.0694203	0.3443299	0.85669863	1.0	3394	tags=66%, list=49%, signal=128%
ALCALAY_AML_NPMC_UP	ALCALAY_AML_NPMC_UP		64	-0.1127907	-1.066877	0.3614931	0.86027414	1.0	3348	tags=59%, list=48%, signal=114%
CMV_HCMV_TIMECOURSE_24HRS_UP	CMV_HCMV_TIMECOURSE_24HRS_UP		29	-0.16231084	-1.066279	0.37181997	0.8590313	1.0	1752	tags=41%, list=25%, signal=55%
LEE_MYC_DN	LEE_MYC_DN		24	-0.18155102	-1.0614434	0.38289204	0.8690851	1.0	1638	tags=42%, list=24%, signal=54%
LEE_MYC_E2F1_UP	LEE_MYC_E2F1_UP		20	-0.19682263	-1.0559447	0.37551868	0.8806437	1.0	3499	tags=70%, list=50%, signal=141%
TRANSLATION	TRANSLATION		49	-0.12692432	-1.0535454	0.38505748	0.88425577	1.0	1535	tags=35%, list=22%, signal=44%
LEI_MYB_REGULATED_GENES	LEI_MYB_REGULATED_GENES		114	-0.08522258	-1.0534735	0.37747034	0.8814697	1.0	4231	tags=69%, list=61%, signal=174%
NOVA2_KO_SPLICING	NOVA2_KO_SPLICING		22	-0.18768877	-1.0518553	0.37396693	0.88288283	1.0	280	tags=23%, list=4%, signal=24%
G_PROTEIN_COUPLED_RECEPTOR_PROTEIN_SIGNALING_PATHWAY	G_PROTEIN_COUPLED_RECEPTOR_PROTEIN_SIGNALING_PATHWAY		115	-0.08610212	-1.0513989	0.3815261	0.88101953	1.0	4304	tags=70%, list=62%, signal=182%
NUCLEOLUS	NUCLEOLUS		42	-0.13450208	-1.0503547	0.39562625	0.8810826	1.0	5686	tags=95%, list=82%, signal=523%
DER_IFNB_UP	DER_IFNB_UP		45	-0.13452512	-1.0458539	0.39419088	0.88983065	1.0	3085	tags=58%, list=44%, signal=103%
INFLAMMATORY_RESPONSE	INFLAMMATORY_RESPONSE		43	-0.13433172	-1.0458101	0.38976377	0.8870092	1.0	5695	tags=95%, list=82%, signal=527%
AGEING_BRAIN_UP	AGEING_BRAIN_UP		120	-0.08121332	-1.045521	0.34393638	0.88490504	1.0	2398	tags=43%, list=35%, signal=64%
TNFALPHA_4HRS_UP	TNFALPHA_4HRS_UP		18	-0.20709401	-1.0455159	0.398374	0.8820039	1.0	3196	tags=67%, list=46%, signal=123%
VESICULAR_FRACTION	VESICULAR_FRACTION		19	-0.19762112	-1.0443966	0.37072244	0.882023	1.0	5211	tags=95%, list=75%, signal=379%
MACROMOLECULE_CATABOLIC_PROCESS	MACROMOLECULE_CATABOLIC_PROCESS		53	-0.12196658	-1.0417534	0.3881188	0.88626343	1.0	2436	tags=47%, list=35%, signal=72%
REGULATION_OF_CELLULAR_PROTEIN_METABOLIC_PROCESS	REGULATION_OF_CELLULAR_PROTEIN_METABOLIC_PROCESS		63	-0.10855978	-1.0404481	0.40246406	0.8868149	1.0	5206	tags=86%, list=75%, signal=339%
LEE_TCELLS6_UP	LEE_TCELLS6_UP		15	-0.21938713	-1.0372294	0.39250493	0.89244	1.0	4499	tags=87%, list=65%, signal=246%
CELL_CYCLE_PHASE	CELL_CYCLE_PHASE		75	-0.0974329	-1.0345246	0.385214	0.8966693	1.0	4424	tags=73%, list=64%, signal=200%
MENSE_HYPOXIA_TRANSPORTER_GENES	MENSE_HYPOXIA_TRANSPORTER_GENES		24	-0.17923889	-1.0342873	0.41351888	0.8944393	1.0	1654	tags=42%, list=24%, signal=55%
TNFALPHA_ADIP_DN	TNFALPHA_ADIP_DN		17	-0.21324909	-1.0332942	0.4177215	0.89424074	1.0	3017	tags=65%, list=43%, signal=114%
M_PHASE	M_PHASE		42	-0.13551629	-1.0325459	0.38910505	0.89347684	1.0	4687	tags=81%, list=67%, signal=248%
CELLULAR_CATABOLIC_PROCESS	CELLULAR_CATABOLIC_PROCESS		66	-0.10487981	-1.0303586	0.38623327	0.89656913	1.0	2436	tags=45%, list=35%, signal=69%
TRANSFERASE_ACTIVITY__TRANSFERRING_ACYL_GROUPS	TRANSFERASE_ACTIVITY__TRANSFERRING_ACYL_GROUPS		28	-0.16237709	-1.0274631	0.4070632	0.9014014	1.0	2350	tags=50%, list=34%, signal=75%
HOFFMANN_BIVSBII_BI_TABLE2	HOFFMANN_BIVSBII_BI_TABLE2		82	-0.09814039	-1.024432	0.39648438	0.9068493	1.0	1614	tags=33%, list=23%, signal=42%
CMV_HCMV_TIMECOURSE_48HRS_DN	CMV_HCMV_TIMECOURSE_48HRS_DN		42	-0.13459867	-1.023619	0.41568628	0.90620446	1.0	5024	tags=86%, list=72%, signal=308%
MEMBRANE_ORGANIZATION_AND_BIOGENESIS	MEMBRANE_ORGANIZATION_AND_BIOGENESIS		62	-0.11145016	-1.0226921	0.39130434	0.90566105	1.0	4834	tags=81%, list=70%, signal=263%
ANDROGEN_GENES	ANDROGEN_GENES		16	-0.21160507	-1.0209079	0.40232107	0.90748304	1.0	3743	tags=75%, list=54%, signal=162%
SMITH_HCV_INDUCED_HCC_UP	SMITH_HCV_INDUCED_HCC_UP		16	-0.2095843	-1.0205591	0.44508672	0.9055301	1.0	1587	tags=44%, list=23%, signal=57%
PROTEIN_COMPLEX	PROTEIN_COMPLEX		318	-0.05071696	-1.0198534	0.42911878	0.9044498	1.0	2329	tags=38%, list=34%, signal=55%
DNA_RECOMBINATION	DNA_RECOMBINATION		18	-0.20184807	-1.0190799	0.43392506	0.90365463	1.0	2075	tags=50%, list=30%, signal=71%
PHOSPHOLIPASE_ACTIVITY	PHOSPHOLIPASE_ACTIVITY		16	-0.21362586	-1.0156536	0.4311377	0.9096709	1.0	4163	tags=81%, list=60%, signal=202%
RESPONSE_TO_CHEMICAL_STIMULUS	RESPONSE_TO_CHEMICAL_STIMULUS		112	-0.082845405	-1.0125788	0.4241245	0.9150106	1.0	4271	tags=70%, list=62%, signal=178%
REGULATION_OF_CELLULAR_COMPONENT_ORGANIZATION_AND_BIOGENESIS	REGULATION_OF_CELLULAR_COMPONENT_ORGANIZATION_AND_BIOGENESIS		56	-0.114692174	-1.010789	0.42616034	0.9171108	1.0	1567	tags=34%, list=23%, signal=43%
ST_G_ALPHA_I_PATHWAY	ST_G_ALPHA_I_PATHWAY		21	-0.18566132	-1.0096678	0.3957115	0.91728	1.0	369	tags=24%, list=5%, signal=25%
RETT_UP	RETT_UP		22	-0.17913896	-1.0066487	0.428	0.92251503	1.0	2233	tags=50%, list=32%, signal=73%
GN_CAMP_GRANULOSA_DN	GN_CAMP_GRANULOSA_DN		28	-0.15991902	-1.006455	0.4377432	0.92015177	1.0	631	tags=25%, list=9%, signal=27%
ADIP_HUMAN_UP	ADIP_HUMAN_UP		30	-0.15565516	-1.0061778	0.44331983	0.9180348	1.0	1008	tags=30%, list=15%, signal=35%
ORGANELLE_ORGANIZATION_AND_BIOGENESIS	ORGANELLE_ORGANIZATION_AND_BIOGENESIS		187	-0.06411887	-1.0050337	0.42524272	0.91814935	1.0	4915	tags=77%, list=71%, signal=256%
INTEGRIN_BINDING	INTEGRIN_BINDING		15	-0.22089769	-1.0038279	0.4322709	0.91868395	1.0	1248	tags=40%, list=18%, signal=49%
TCRPATHWAY	TCRPATHWAY		22	-0.17794384	-1.0025591	0.44354838	0.91923046	1.0	5082	tags=91%, list=73%, signal=338%
EXTRACELLULAR_MATRIX_PART	EXTRACELLULAR_MATRIX_PART		32	-0.14829282	-1.0022937	0.4296875	0.91714907	1.0	2231	tags=47%, list=32%, signal=69%
UVC_LOW_ALL_DN	UVC_LOW_ALL_DN		34	-0.14579044	-0.999499	0.44726562	0.9216265	1.0	3691	tags=68%, list=53%, signal=144%
ROSS_FAB_M7	ROSS_FAB_M7		24	-0.17379574	-0.99933803	0.42857143	0.91931146	1.0	3717	tags=71%, list=54%, signal=152%
FLECHNER_KIDNEY_TRANSPLANT_REJECTION_DN	FLECHNER_KIDNEY_TRANSPLANT_REJECTION_DN		250	-0.05513116	-0.9987973	0.44123712	0.91803753	1.0	2354	tags=39%, list=34%, signal=57%
POTASSIUM_CHANNEL_ACTIVITY	POTASSIUM_CHANNEL_ACTIVITY		15	-0.21058355	-0.9987953	0.45041323	0.9153112	1.0	4560	tags=87%, list=66%, signal=252%
DSRNA_UP	DSRNA_UP		16	-0.20554273	-0.9938897	0.4417178	0.9254644	1.0	2483	tags=56%, list=36%, signal=87%
HSA04620_TOLL_LIKE_RECEPTOR_SIGNALING_PATHWAY	HSA04620_TOLL_LIKE_RECEPTOR_SIGNALING_PATHWAY		47	-0.1216224	-0.9929374	0.44959676	0.92512524	1.0	3890	tags=68%, list=56%, signal=154%
VANASSE_BCL2_TARGETS	VANASSE_BCL2_TARGETS		41	-0.12965025	-0.9928834	0.45790553	0.9225291	1.0	4187	tags=73%, list=60%, signal=183%
UV-CMV_UNIQUE_HCMV_6HRS_UP	UV-CMV_UNIQUE_HCMV_6HRS_UP		51	-0.1174991	-0.9911661	0.45309383	0.9241994	1.0	2595	tags=49%, list=37%, signal=78%
NEUROTRANSMITTER_RECEPTOR_ACTIVITY	NEUROTRANSMITTER_RECEPTOR_ACTIVITY		15	-0.21205562	-0.98867273	0.43683085	0.9279979	1.0	3161	tags=67%, list=46%, signal=122%
AGUIRRE_PANCREAS_CHR12	AGUIRRE_PANCREAS_CHR12		21	-0.18171313	-0.987522	0.45185184	0.92833	1.0	5687	tags=100%, list=82%, signal=551%
REGULATION_OF_APOPTOSIS	REGULATION_OF_APOPTOSIS		126	-0.075812325	-0.9827338	0.46307385	0.938022	1.0	1413	tags=28%, list=20%, signal=34%
NEGATIVE_REGULATION_OF_TRANSCRIPTION__DNA_DEPENDENT	NEGATIVE_REGULATION_OF_TRANSCRIPTION__DNA_DEPENDENT		69	-0.10035517	-0.98107636	0.45242718	0.93961847	1.0	1827	tags=36%, list=26%, signal=49%
SIG_BCR_SIGNALING_PATHWAY	SIG_BCR_SIGNALING_PATHWAY		20	-0.18339108	-0.9809292	0.48289737	0.937281	1.0	3592	tags=70%, list=52%, signal=145%
BASOLATERAL_PLASMA_MEMBRANE	BASOLATERAL_PLASMA_MEMBRANE		18	-0.19395512	-0.9806175	0.4612326	0.93530506	1.0	3287	tags=67%, list=47%, signal=126%
GSK3PATHWAY	GSK3PATHWAY		16	-0.20395496	-0.980065	0.46837944	0.93413603	1.0	3362	tags=69%, list=48%, signal=133%
DEFENSE_RESPONSE	DEFENSE_RESPONSE		86	-0.08785869	-0.97801536	0.46407768	0.9368207	1.0	5858	tags=93%, list=84%, signal=587%
LIPID_BINDING	LIPID_BINDING		35	-0.13886236	-0.9763975	0.44117647	0.9384223	1.0	1224	tags=31%, list=18%, signal=38%
RESPONSE_TO_BIOTIC_STIMULUS	RESPONSE_TO_BIOTIC_STIMULUS		40	-0.13340092	-0.9754744	0.46374047	0.9381833	1.0	4288	tags=75%, list=62%, signal=195%
RUTELLA_HEMATOGFSNDCS_DIFF	RUTELLA_HEMATOGFSNDCS_DIFF		276	-0.049653072	-0.9746668	0.4621359	0.93761057	1.0	1104	tags=21%, list=16%, signal=24%
IMMUNE_RESPONSE	IMMUNE_RESPONSE		81	-0.09289033	-0.97196233	0.46028513	0.9418103	1.0	3307	tags=57%, list=48%, signal=107%
IRITANI_ADPROX_VASC	IRITANI_ADPROX_VASC		58	-0.10882651	-0.9712271	0.47764227	0.9411591	1.0	2125	tags=41%, list=31%, signal=59%
HSA04650_NATURAL_KILLER_CELL_MEDIATED_CYTOTOXICITY	HSA04650_NATURAL_KILLER_CELL_MEDIATED_CYTOTOXICITY		47	-0.12248618	-0.9692751	0.49015749	0.94332063	1.0	5066	tags=85%, list=73%, signal=313%
SPLICEOSOME	SPLICEOSOME		15	-0.21001588	-0.9677853	0.4765343	0.94440776	1.0	4101	tags=80%, list=59%, signal=195%
REGULATION_OF_PROTEIN_METABOLIC_PROCESS	REGULATION_OF_PROTEIN_METABOLIC_PROCESS		66	-0.09986605	-0.96713483	0.48414376	0.943376	1.0	5206	tags=85%, list=75%, signal=336%
PHOSPHOLIPID_METABOLIC_PROCESS	PHOSPHOLIPID_METABOLIC_PROCESS		24	-0.16830441	-0.966777	0.48249027	0.94176185	1.0	4623	tags=83%, list=67%, signal=248%
MITOCHONDRIAL_ENVELOPE	MITOCHONDRIAL_ENVELOPE		24	-0.16498072	-0.9643376	0.49486652	0.9454495	1.0	4646	tags=83%, list=67%, signal=251%
HDACI_COLON_SUL48HRS_DN	HDACI_COLON_SUL48HRS_DN		45	-0.12216261	-0.96148396	0.48296595	0.95007634	1.0	547	tags=20%, list=8%, signal=22%
DFOSB_BRAIN_2WKS_UP	DFOSB_BRAIN_2WKS_UP		19	-0.17893216	-0.9597041	0.51844263	0.9520388	1.0	4244	tags=79%, list=61%, signal=202%
ELONGINA_KO_UP	ELONGINA_KO_UP		80	-0.09169581	-0.95947605	0.4848485	0.9499467	1.0	1368	tags=29%, list=20%, signal=35%
PROTEIN_TRANSPORT	PROTEIN_TRANSPORT		68	-0.100349076	-0.9590529	0.4969325	0.9483229	1.0	1047	tags=25%, list=15%, signal=29%
IL6_FIBRO_UP	IL6_FIBRO_UP		19	-0.1802926	-0.95873743	0.507722	0.94646776	1.0	5331	tags=95%, list=77%, signal=407%
SHEPARD_GENES_COMMON_BW_CB_MO	SHEPARD_GENES_COMMON_BW_CB_MO		27	-0.15410231	-0.95850915	0.47195357	0.944475	1.0	221	tags=19%, list=3%, signal=19%
DER_IFNG_UP	DER_IFNG_UP		22	-0.16986683	-0.9575328	0.4910891	0.9443518	1.0	4191	tags=77%, list=60%, signal=194%
MITOCHONDRIAL_MEMBRANE	MITOCHONDRIAL_MEMBRANE		20	-0.18160021	-0.95699644	0.5	0.9431187	1.0	4646	tags=85%, list=67%, signal=256%
BYSTROM_IL5_UP	BYSTROM_IL5_UP		17	-0.19236746	-0.9557128	0.5019763	0.94377023	1.0	5204	tags=94%, list=75%, signal=375%
CROMER_HYPOPHARYNGEAL_MET_VS_NON_UP	CROMER_HYPOPHARYNGEAL_MET_VS_NON_UP		43	-0.12450503	-0.9542777	0.48039216	0.9448053	1.0	3179	tags=58%, list=46%, signal=107%
MEMBRANE_LIPID_BIOSYNTHETIC_PROCESS	MEMBRANE_LIPID_BIOSYNTHETIC_PROCESS		17	-0.1902105	-0.9532794	0.49570817	0.9447976	1.0	4402	tags=82%, list=63%, signal=224%
CHROMOSOMAL_PART	CHROMOSOMAL_PART		38	-0.12717395	-0.9513116	0.50300604	0.9472857	1.0	2412	tags=47%, list=35%, signal=72%
GTPASE_ACTIVATOR_ACTIVITY	GTPASE_ACTIVATOR_ACTIVITY		30	-0.14739177	-0.95036805	0.50291264	0.9471162	1.0	5463	tags=93%, list=79%, signal=436%
REGULATION_OF_PROGRAMMED_CELL_DEATH	REGULATION_OF_PROGRAMMED_CELL_DEATH		127	-0.07359555	-0.9499019	0.49266246	0.9457062	1.0	1413	tags=28%, list=20%, signal=34%
IFN_BETA_UP	IFN_BETA_UP		35	-0.1324649	-0.94783235	0.48249027	0.94840455	1.0	2657	tags=51%, list=38%, signal=83%
SMITH_HTERT_DN	SMITH_HTERT_DN		18	-0.18894984	-0.9468968	0.51821864	0.94811034	1.0	4479	tags=83%, list=65%, signal=234%
ENDOPLASMIC_RETICULUM	ENDOPLASMIC_RETICULUM		116	-0.07669739	-0.94686574	0.54805726	0.94566786	1.0	914	tags=21%, list=13%, signal=23%
CHROMOSOME_SEGREGATION	CHROMOSOME_SEGREGATION		15	-0.2062924	-0.9456125	0.503861	0.9462671	1.0	2738	tags=60%, list=39%, signal=99%
MICROSOME	MICROSOME		17	-0.19135693	-0.94529647	0.53235906	0.94458157	1.0	5211	tags=94%, list=75%, signal=376%
NEUROTRANSMITTER_BINDING	NEUROTRANSMITTER_BINDING		17	-0.19246086	-0.9438662	0.51600754	0.9456825	1.0	3161	tags=65%, list=46%, signal=118%
HOFMANN_MDS_CD34_LOW_RISK	HOFMANN_MDS_CD34_LOW_RISK		15	-0.19832589	-0.93928635	0.512476	0.95473444	1.0	4182	tags=80%, list=60%, signal=201%
BASSO_GERMINAL_CENTER_CD40_DN	BASSO_GERMINAL_CENTER_CD40_DN		33	-0.13819867	-0.93864757	0.5462012	0.9537061	1.0	1571	tags=36%, list=23%, signal=47%
PASSERINI_SIGNAL	PASSERINI_SIGNAL		155	-0.0641332	-0.93841946	0.51132077	0.95181865	1.0	2388	tags=41%, list=34%, signal=61%
RESPONSE_TO_OTHER_ORGANISM	RESPONSE_TO_OTHER_ORGANISM		26	-0.15801585	-0.9377306	0.5117647	0.9509031	1.0	2914	tags=58%, list=42%, signal=99%
IMMUNE_SYSTEM_PROCESS	IMMUNE_SYSTEM_PROCESS		113	-0.07754343	-0.9374638	0.5224171	0.94907236	1.0	1745	tags=33%, list=25%, signal=43%
BROCKE_IL6	BROCKE_IL6		76	-0.09194434	-0.9371183	0.5441767	0.94747597	1.0	1471	tags=30%, list=21%, signal=38%
LAL_KO_6MO_UP	LAL_KO_6MO_UP		24	-0.15895951	-0.9358553	0.51329243	0.94808525	1.0	2373	tags=50%, list=34%, signal=76%
ACETYLTRANSFERASE_ACTIVITY	ACETYLTRANSFERASE_ACTIVITY		15	-0.19996153	-0.9320069	0.5244898	0.9550945	1.0	1856	tags=47%, list=27%, signal=64%
KRETZSCHMAR_IL6_DIFF	KRETZSCHMAR_IL6_DIFF		76	-0.09194434	-0.93062985	0.51632655	0.95596814	1.0	1471	tags=30%, list=21%, signal=38%
KUMAR_HOXA_DIFF	KUMAR_HOXA_DIFF		132	-0.06930727	-0.93023145	0.53435117	0.9544909	1.0	4053	tags=65%, list=58%, signal=154%
HDACI_COLON_CURSUL_UP	HDACI_COLON_CURSUL_UP		21	-0.16924262	-0.92895365	0.5406504	0.9551809	1.0	4120	tags=76%, list=59%, signal=187%
ET743_SARCOMA_48HRS_DN	ET743_SARCOMA_48HRS_DN		92	-0.083079495	-0.9287835	0.5273834	0.9531451	1.0	1998	tags=37%, list=29%, signal=51%
HOMEOSTATIC_PROCESS	HOMEOSTATIC_PROCESS		82	-0.0869938	-0.92758054	0.5364891	0.953622	1.0	2622	tags=46%, list=38%, signal=74%
MOREAUX_TACI_HI_VS_LOW_DN	MOREAUX_TACI_HI_VS_LOW_DN		68	-0.09612294	-0.9275763	0.5111562	0.95119655	1.0	1893	tags=37%, list=27%, signal=50%
PYRUVATE_METABOLISM	PYRUVATE_METABOLISM		16	-0.19399539	-0.92743826	0.53100777	0.94908226	1.0	4733	tags=88%, list=68%, signal=274%
UBIQUITIN_CYCLE	UBIQUITIN_CYCLE		29	-0.14653802	-0.9267788	0.55130786	0.9483228	1.0	4495	tags=79%, list=65%, signal=224%
DI___TRI_VALENT_INORGANIC_CATION_TRANSPORT	DI___TRI_VALENT_INORGANIC_CATION_TRANSPORT		17	-0.18618535	-0.9257976	0.5449438	0.94834346	1.0	2796	tags=59%, list=40%, signal=98%
REGULATION_OF_DNA_BINDING	REGULATION_OF_DNA_BINDING		19	-0.17597567	-0.9248376	0.5173077	0.9482755	1.0	3899	tags=74%, list=56%, signal=168%
AGED_MOUSE_HIPPOCAMPUS_ANY_UP	AGED_MOUSE_HIPPOCAMPUS_ANY_UP		27	-0.14684165	-0.92430717	0.55666006	0.94711995	1.0	4129	tags=74%, list=59%, signal=182%
M_PHASE_OF_MITOTIC_CELL_CYCLE	M_PHASE_OF_MITOTIC_CELL_CYCLE		32	-0.1383102	-0.9240066	0.54027504	0.9455274	1.0	4687	tags=81%, list=67%, signal=249%
SANSOM_APC_4_DN	SANSOM_APC_4_DN		22	-0.16484988	-0.9228475	0.5418327	0.9460733	1.0	1385	tags=36%, list=20%, signal=45%
MITOCHONDRIAL_PART	MITOCHONDRIAL_PART		37	-0.12932433	-0.92248434	0.5405405	0.9445425	1.0	4175	tags=73%, list=60%, signal=182%
HSA04640_HEMATOPOIETIC_CELL_LINEAGE	HSA04640_HEMATOPOIETIC_CELL_LINEAGE		29	-0.14477775	-0.9212404	0.5534351	0.9450407	1.0	676	tags=24%, list=10%, signal=27%
HEARTFAILURE_VENTRICLE_DN	HEARTFAILURE_VENTRICLE_DN		21	-0.16563147	-0.9164549	0.53638256	0.954314	1.0	5137	tags=90%, list=74%, signal=347%
CYTOKINE_PRODUCTION	CYTOKINE_PRODUCTION		25	-0.15487786	-0.9138022	0.5780347	0.9586104	1.0	1707	tags=40%, list=25%, signal=53%
HDACI_COLON_CLUSTER9	HDACI_COLON_CLUSTER9		20	-0.17091274	-0.91358507	0.546	0.95687026	1.0	2984	tags=60%, list=43%, signal=105%
HSA04660_T_CELL_RECEPTOR_SIGNALING_PATHWAY	HSA04660_T_CELL_RECEPTOR_SIGNALING_PATHWAY		46	-0.11386412	-0.91158915	0.55263156	0.9593606	1.0	1178	tags=28%, list=17%, signal=34%
RIBOSOMAL_PROTEINS	RIBOSOMAL_PROTEINS		18	-0.17730291	-0.9110899	0.56143665	0.958221	1.0	5717	tags=100%, list=82%, signal=564%
IRITANI_ADPROX_DN	IRITANI_ADPROX_DN		29	-0.14402974	-0.9083595	0.5559772	0.9623914	1.0	3794	tags=69%, list=55%, signal=151%
FLECHNER_KIDNEY_TRANSPLANT_REJECTION_PBL_UP	FLECHNER_KIDNEY_TRANSPLANT_REJECTION_PBL_UP		29	-0.14264843	-0.90803057	0.5748503	0.96080405	1.0	4043	tags=72%, list=58%, signal=173%
FALT_BCLL_IG_MUTATED_VS_WT_DN	FALT_BCLL_IG_MUTATED_VS_WT_DN		18	-0.17893924	-0.9068611	0.5566219	0.96124667	1.0	3391	tags=67%, list=49%, signal=130%
LEE_DENA_DN	LEE_DENA_DN		25	-0.15307412	-0.9050496	0.5685885	0.9631227	1.0	2275	tags=48%, list=33%, signal=71%
TGFBETA_EARLY_UP	TGFBETA_EARLY_UP		21	-0.16563147	-0.90314335	0.56653225	0.9653713	1.0	4145	tags=76%, list=60%, signal=188%
UVC_TTD_8HR_DN	UVC_TTD_8HR_DN		108	-0.07471882	-0.9024344	0.57563025	0.96471167	1.0	3348	tags=56%, list=48%, signal=106%
STRESS_ARSENIC_SPECIFIC_UP	STRESS_ARSENIC_SPECIFIC_UP		55	-0.101487234	-0.9013876	0.5805785	0.9648074	1.0	3342	tags=58%, list=48%, signal=111%
MACROMOLECULE_LOCALIZATION	MACROMOLECULE_LOCALIZATION		94	-0.07969249	-0.9008967	0.5866935	0.96364814	1.0	2410	tags=43%, list=35%, signal=64%
IFN_ANY_UP	IFN_ANY_UP		42	-0.11392834	-0.90078104	0.5746888	0.9616162	1.0	4340	tags=74%, list=63%, signal=196%
PROTEIN_HETERODIMERIZATION_ACTIVITY	PROTEIN_HETERODIMERIZATION_ACTIVITY		39	-0.12107169	-0.90044916	0.5791583	0.96006405	1.0	6109	tags=100%, list=88%, signal=827%
HSA04630_JAK_STAT_SIGNALING_PATHWAY	HSA04630_JAK_STAT_SIGNALING_PATHWAY		69	-0.09105873	-0.8996303	0.58677685	0.9596396	1.0	1589	tags=32%, list=23%, signal=41%
HPV31_DN	HPV31_DN		23	-0.16015528	-0.8995279	0.55942625	0.9575861	1.0	4327	tags=78%, list=62%, signal=207%
HSA04912_GNRH_SIGNALING_PATHWAY	HSA04912_GNRH_SIGNALING_PATHWAY		46	-0.11476544	-0.8993699	0.5803922	0.9556752	1.0	417	tags=17%, list=6%, signal=18%
HADDAD_HSC_CD7_DN	HADDAD_HSC_CD7_DN		42	-0.1153289	-0.8975465	0.5659229	0.95769155	1.0	4165	tags=71%, list=60%, signal=177%
INTRINSIC_TO_PLASMA_MEMBRANE	INTRINSIC_TO_PLASMA_MEMBRANE		346	-0.041568045	-0.8972148	0.5813008	0.956149	1.0	2697	tags=43%, list=39%, signal=66%
TRANSFERASE_ACTIVITY__TRANSFERRING_GROUPS_OTHER_THAN_AMINO_ACYL_GROUPS	TRANSFERASE_ACTIVITY__TRANSFERRING_GROUPS_OTHER_THAN_AMINO_ACYL_GROUPS		23	-0.15514845	-0.8943948	0.5891784	0.9605312	1.0	3154	tags=61%, list=45%, signal=111%
CMV-UV_HCMV_6HRS_UP	CMV-UV_HCMV_6HRS_UP		62	-0.0970648	-0.89156234	0.58185405	0.9648026	1.0	1797	tags=35%, list=26%, signal=47%
RAY_P210_DIFF	RAY_P210_DIFF		20	-0.16351818	-0.89052767	0.59961313	0.9648946	1.0	4424	tags=80%, list=64%, signal=220%
HSA04120_UBIQUITIN_MEDIATED_PROTEOLYSIS	HSA04120_UBIQUITIN_MEDIATED_PROTEOLYSIS		20	-0.17232811	-0.89051837	0.6053719	0.9626448	1.0	4363	tags=80%, list=63%, signal=215%
HOX_GENES	HOX_GENES		24	-0.15573215	-0.8887534	0.6092184	0.9643897	1.0	2974	tags=58%, list=43%, signal=102%
MITOSIS	MITOSIS		31	-0.13221468	-0.888501	0.5767717	0.9627031	1.0	4687	tags=81%, list=67%, signal=247%
WIELAND_HEPATITIS_B_INDUCED	WIELAND_HEPATITIS_B_INDUCED		28	-0.14155582	-0.8874786	0.5908142	0.96279854	1.0	4974	tags=86%, list=72%, signal=301%
HSA00561_GLYCEROLIPID_METABOLISM	HSA00561_GLYCEROLIPID_METABOLISM		24	-0.15187858	-0.88722026	0.576	0.9611335	1.0	1554	tags=38%, list=22%, signal=48%
DEPHOSPHORYLATION	DEPHOSPHORYLATION		30	-0.13402754	-0.88651484	0.5991903	0.9606139	1.0	1389	tags=33%, list=20%, signal=41%
AGED_MOUSE_MUSCLE_UP	AGED_MOUSE_MUSCLE_UP		16	-0.17855081	-0.8828194	0.5983437	0.966931	1.0	1368	tags=38%, list=20%, signal=47%
CELL_ADHESION	CELL_ADHESION		65	-0.09447259	-0.8819798	0.5808383	0.96659714	1.0	4479	tags=74%, list=65%, signal=206%
HADDAD_CD45CD7_PLUS_VS_MINUS_DN	HADDAD_CD45CD7_PLUS_VS_MINUS_DN		42	-0.1153289	-0.88171655	0.58082706	0.96500516	1.0	4165	tags=71%, list=60%, signal=177%
CENTROSOME	CENTROSOME		30	-0.13092275	-0.8813309	0.5883495	0.9636405	1.0	4651	tags=80%, list=67%, signal=241%
STRESS_GENOTOXIC_SPECIFIC_DN	STRESS_GENOTOXIC_SPECIFIC_DN		22	-0.16190802	-0.88034695	0.61960787	0.9636592	1.0	5193	tags=91%, list=75%, signal=359%
IL1_CORNEA_DN	IL1_CORNEA_DN		43	-0.11559833	-0.8790262	0.62015504	0.9643734	1.0	2756	tags=51%, list=40%, signal=84%
NI2_MOUSE_UP	NI2_MOUSE_UP		16	-0.18360277	-0.87886655	0.60358566	0.96246713	1.0	4805	tags=88%, list=69%, signal=283%
KANG_TERT_UP	KANG_TERT_UP		35	-0.12566218	-0.8782992	0.5737374	0.9615586	1.0	4688	tags=80%, list=68%, signal=245%
CANCER_UNDIFFERENTIATED_META_UP	CANCER_UNDIFFERENTIATED_META_UP		25	-0.1477381	-0.8778994	0.5945419	0.9601829	1.0	4534	tags=80%, list=65%, signal=230%
ZHAN_MM_CD138_HP_VS_REST	ZHAN_MM_CD138_HP_VS_REST		23	-0.15262304	-0.8778089	0.58116233	0.95819587	1.0	1360	tags=35%, list=20%, signal=43%
INTRACELLULAR_PROTEIN_TRANSPORT	INTRACELLULAR_PROTEIN_TRANSPORT		61	-0.09655298	-0.8773839	0.5940803	0.9569426	1.0	2410	tags=44%, list=35%, signal=67%
FLECHNER_KIDNEY_TRANSPLANT_WELL_UP	FLECHNER_KIDNEY_TRANSPLANT_WELL_UP		305	-0.043738097	-0.8762516	0.58365756	0.9573765	1.0	1532	tags=26%, list=22%, signal=32%
VENTRICLES_UP	VENTRICLES_UP		77	-0.08639475	-0.8746485	0.6104651	0.9588057	1.0	4007	tags=66%, list=58%, signal=155%
HOFFMANN_BIVSBII_BI	HOFFMANN_BIVSBII_BI		35	-0.12395427	-0.8723902	0.61167	0.9616178	1.0	4303	tags=74%, list=62%, signal=194%
ORGANELLE_PART	ORGANELLE_PART		476	-0.03566881	-0.8692764	0.61857706	0.96647173	1.0	3855	tags=59%, list=56%, signal=123%
AGUIRRE_PANCREAS_CHR8	AGUIRRE_PANCREAS_CHR8		20	-0.1649913	-0.8689058	0.58551306	0.96514744	1.0	1289	tags=35%, list=19%, signal=43%
SKELETAL_DEVELOPMENT	SKELETAL_DEVELOPMENT		46	-0.10954025	-0.86879843	0.6320939	0.96323884	1.0	4076	tags=70%, list=59%, signal=167%
LEE_MYC_TGFA_DN	LEE_MYC_TGFA_DN		23	-0.15128496	-0.86858916	0.60042286	0.9615737	1.0	2275	tags=48%, list=33%, signal=71%
TPA_SENS_MIDDLE_UP	TPA_SENS_MIDDLE_UP		27	-0.13984866	-0.86762595	0.61601645	0.9614065	1.0	3663	tags=67%, list=53%, signal=141%
IDX_TSA_UP_CLUSTER3	IDX_TSA_UP_CLUSTER3		40	-0.11709153	-0.86700135	0.6223507	0.96072006	1.0	5095	tags=85%, list=73%, signal=317%
PROTEIN_AMINO_ACID_DEPHOSPHORYLATION	PROTEIN_AMINO_ACID_DEPHOSPHORYLATION		30	-0.13402754	-0.864987	0.64541835	0.9630682	1.0	1389	tags=33%, list=20%, signal=41%
HDACI_COLON_CLUSTER6	HDACI_COLON_CLUSTER6		20	-0.16088961	-0.8648659	0.61507934	0.96114266	1.0	623	tags=25%, list=9%, signal=27%
UVB_NHEK3_C1	UVB_NHEK3_C1		19	-0.1669618	-0.8644613	0.6356275	0.95988846	1.0	2865	tags=58%, list=41%, signal=98%
UEDA_MOUSE_LIVER	UEDA_MOUSE_LIVER		66	-0.09132759	-0.86371917	0.62015504	0.9594082	1.0	2424	tags=44%, list=35%, signal=67%
SENSORY_PERCEPTION	SENSORY_PERCEPTION		64	-0.09142442	-0.8632506	0.6199187	0.95837164	1.0	4146	tags=69%, list=60%, signal=169%
LEE_DENA_UP	LEE_DENA_UP		25	-0.14206098	-0.8627509	0.6414729	0.9572728	1.0	3740	tags=68%, list=54%, signal=147%
TAKEDA_NUP8_HOXA9_6H_DN	TAKEDA_NUP8_HOXA9_6H_DN		15	-0.18450956	-0.8615373	0.5988024	0.9576541	1.0	2426	tags=53%, list=35%, signal=82%
SASAKI_ATL_UP	SASAKI_ATL_UP		63	-0.08978015	-0.86121637	0.6215686	0.95633596	1.0	1257	tags=27%, list=18%, signal=33%
FATTY_ACID_METABOLISM	FATTY_ACID_METABOLISM		37	-0.1184697	-0.85982233	0.6325301	0.9572942	1.0	4813	tags=81%, list=69%, signal=263%
DIAB_NEPH_DN	DIAB_NEPH_DN		217	-0.050096605	-0.8588142	0.6500956	0.95737517	1.0	3856	tags=60%, list=56%, signal=132%
PEPTIDYL_AMINO_ACID_MODIFICATION	PEPTIDYL_AMINO_ACID_MODIFICATION		26	-0.14015833	-0.8586297	0.62884617	0.95569396	1.0	4640	tags=81%, list=67%, signal=243%
ATPASE_ACTIVITY	ATPASE_ACTIVITY		45	-0.11060861	-0.85826486	0.6565041	0.9544981	1.0	3250	tags=58%, list=47%, signal=108%
LYASE_ACTIVITY	LYASE_ACTIVITY		18	-0.17064522	-0.8566368	0.59411764	0.95585185	1.0	4220	tags=78%, list=61%, signal=198%
CELL_CYCLE	CELL_CYCLE		32	-0.12760417	-0.85615456	0.6183953	0.9548457	1.0	5412	tags=91%, list=78%, signal=409%
IGF_VS_PDGF_UP	IGF_VS_PDGF_UP		22	-0.15084971	-0.85570025	0.6516008	0.9537724	1.0	535	tags=23%, list=8%, signal=25%
PASSERINI_ADHESION	PASSERINI_ADHESION		16	-0.17970555	-0.85447407	0.6354379	0.95441717	1.0	4398	tags=81%, list=63%, signal=221%
HSA00380_TRYPTOPHAN_METABOLISM	HSA00380_TRYPTOPHAN_METABOLISM		21	-0.15638693	-0.8531908	0.6493776	0.9551074	1.0	5201	tags=90%, list=75%, signal=359%
CPR_NULL_LIVER_UP	CPR_NULL_LIVER_UP		15	-0.18137299	-0.85300255	0.6461233	0.9534898	1.0	596	tags=27%, list=9%, signal=29%
SIG_INSULIN_RECEPTOR_PATHWAY_IN_CARDIAC_MYOCYTES	SIG_INSULIN_RECEPTOR_PATHWAY_IN_CARDIAC_MYOCYTES		28	-0.13447079	-0.8529972	0.6583851	0.951465	1.0	3039	tags=57%, list=44%, signal=101%
MEMBRANE_FUSION	MEMBRANE_FUSION		15	-0.18220042	-0.8527064	0.6302187	0.94998974	1.0	2442	tags=53%, list=35%, signal=82%
BRCA1KO_MEF_DN	BRCA1KO_MEF_DN		48	-0.10377994	-0.852181	0.6369168	0.9490627	1.0	3336	tags=58%, list=48%, signal=111%
HSA04540_GAP_JUNCTION	HSA04540_GAP_JUNCTION		43	-0.110479414	-0.8498345	0.632	0.95189786	1.0	369	tags=16%, list=5%, signal=17%
NI2_MOUSE_DN	NI2_MOUSE_DN		21	-0.15595359	-0.84962046	0.6442308	0.9503591	1.0	3220	tags=62%, list=46%, signal=115%
REGULATION_OF_MULTICELLULAR_ORGANISMAL_PROCESS	REGULATION_OF_MULTICELLULAR_ORGANISMAL_PROCESS		50	-0.100551195	-0.8479849	0.63564354	0.95178986	1.0	1391	tags=30%, list=20%, signal=37%
HOFFMANN_BIVSBII_IMVM	HOFFMANN_BIVSBII_IMVM		26	-0.13584402	-0.84672195	0.6572008	0.9524386	1.0	1732	tags=38%, list=25%, signal=51%
KANG_TERT_DN	KANG_TERT_DN		44	-0.10403158	-0.8440198	0.6686508	0.95609725	1.0	2913	tags=52%, list=42%, signal=89%
MICROTUBULE_CYTOSKELETON	MICROTUBULE_CYTOSKELETON		64	-0.092078485	-0.8429819	0.625	0.9562224	1.0	4467	tags=73%, list=64%, signal=204%
HELICASE_ACTIVITY	HELICASE_ACTIVITY		17	-0.1674182	-0.8424688	0.6794355	0.9553841	1.0	2926	tags=59%, list=42%, signal=101%
FLECHNER_KIDNEY_TRANSPLANT_REJECTION_UP	FLECHNER_KIDNEY_TRANSPLANT_REJECTION_UP		23	-0.14610228	-0.8365269	0.6544715	0.9660307	1.0	5330	tags=91%, list=77%, signal=392%
BRENTANI_SIGNALING	BRENTANI_SIGNALING		86	-0.076457985	-0.8336079	0.67803836	0.97008705	1.0	5048	tags=80%, list=73%, signal=290%
PENG_RAPAMYCIN_UP	PENG_RAPAMYCIN_UP		44	-0.10541497	-0.8333307	0.65384614	0.9686674	1.0	2430	tags=45%, list=35%, signal=69%
TISSUE_DEVELOPMENT	TISSUE_DEVELOPMENT		42	-0.10987155	-0.8330761	0.66799206	0.96714735	1.0	4368	tags=74%, list=63%, signal=198%
SASAKI_TCELL_LYMPHOMA_VS_CD4_UP	SASAKI_TCELL_LYMPHOMA_VS_CD4_UP		63	-0.08978015	-0.83209336	0.6582031	0.9671209	1.0	1257	tags=27%, list=18%, signal=33%
LIGASE_ACTIVITY	LIGASE_ACTIVITY		47	-0.102449715	-0.83130866	0.6647174	0.9667143	1.0	3579	tags=62%, list=52%, signal=126%
HSA00350_TYROSINE_METABOLISM	HSA00350_TYROSINE_METABOLISM		22	-0.14847258	-0.8303482	0.6653772	0.96674466	1.0	1814	tags=41%, list=26%, signal=55%
CELLULAR_BIOSYNTHETIC_PROCESS	CELLULAR_BIOSYNTHETIC_PROCESS		104	-0.07104138	-0.8296989	0.6936416	0.96606666	1.0	6192	tags=96%, list=89%, signal=875%
INTRACELLULAR_ORGANELLE_PART	INTRACELLULAR_ORGANELLE_PART		474	-0.033793107	-0.8257417	0.6699801	0.97188896	1.0	3855	tags=59%, list=56%, signal=123%
BCRPATHWAY	BCRPATHWAY		17	-0.16284955	-0.82567453	0.694332	0.9700275	1.0	5000	tags=88%, list=72%, signal=314%
INTRINSIC_TO_ORGANELLE_MEMBRANE	INTRINSIC_TO_ORGANELLE_MEMBRANE		23	-0.14558713	-0.8242793	0.68307084	0.9708556	1.0	3824	tags=70%, list=55%, signal=154%
NOUZOVA_CPG_METHLTD	NOUZOVA_CPG_METHLTD		21	-0.1539795	-0.8241336	0.6784314	0.96920145	1.0	4887	tags=86%, list=70%, signal=288%
BRENTANI_CELL_ADHESION	BRENTANI_CELL_ADHESION		44	-0.10422923	-0.82236516	0.68209255	0.9708766	1.0	4332	tags=73%, list=62%, signal=192%
CHESLER_BRAIN_CIS_GENES	CHESLER_BRAIN_CIS_GENES		31	-0.12425865	-0.8223582	0.69512194	0.96891737	1.0	5190	tags=87%, list=75%, signal=343%
BIOPOLYMER_CATABOLIC_PROCESS	BIOPOLYMER_CATABOLIC_PROCESS		47	-0.102020904	-0.8220979	0.65983605	0.96743625	1.0	2400	tags=45%, list=35%, signal=68%
JECHLINGER_EMT_DN	JECHLINGER_EMT_DN		15	-0.17208833	-0.819819	0.67870724	0.96992975	1.0	2975	tags=60%, list=43%, signal=105%
CELLULAR_PROTEIN_CATABOLIC_PROCESS	CELLULAR_PROTEIN_CATABOLIC_PROCESS		32	-0.1238426	-0.81977874	0.67722774	0.9680376	1.0	2400	tags=47%, list=35%, signal=71%
INTEGRAL_TO_ORGANELLE_MEMBRANE	INTEGRAL_TO_ORGANELLE_MEMBRANE		23	-0.14558713	-0.81908876	0.68367344	0.96762997	1.0	3824	tags=70%, list=55%, signal=154%
PROTEIN_CATABOLIC_PROCESS	PROTEIN_CATABOLIC_PROCESS		35	-0.11564626	-0.8190403	0.6701245	0.9657841	1.0	5154	tags=86%, list=74%, signal=331%
MACROMOLECULAR_COMPLEX	MACROMOLECULAR_COMPLEX		361	-0.03790845	-0.8186833	0.69822484	0.96452516	1.0	2329	tags=37%, list=34%, signal=53%
BIOPEPTIDESPATHWAY	BIOPEPTIDESPATHWAY		23	-0.14322507	-0.8184063	0.69590646	0.9631619	1.0	5048	tags=87%, list=73%, signal=317%
INTRACELLULAR_TRANSPORT	INTRACELLULAR_TRANSPORT		116	-0.06598591	-0.818209	0.6904277	0.96158016	1.0	1047	tags=22%, list=15%, signal=25%
INTEGRAL_TO_PLASMA_MEMBRANE	INTEGRAL_TO_PLASMA_MEMBRANE		341	-0.038880378	-0.8180754	0.70018977	0.959943	1.0	2697	tags=43%, list=39%, signal=66%
PARK_MSCS_LIN2	PARK_MSCS_LIN2		21	-0.14521642	-0.8162108	0.69548136	0.9616172	1.0	4617	tags=81%, list=66%, signal=241%
LIPASE_ACTIVITY	LIPASE_ACTIVITY		17	-0.16574529	-0.8161003	0.6799205	0.9599219	1.0	4163	tags=76%, list=60%, signal=190%
CALRES_MOUSE_NEOCORTEX_UP	CALRES_MOUSE_NEOCORTEX_UP		21	-0.1504165	-0.8155651	0.6910891	0.95905864	1.0	5573	tags=95%, list=80%, signal=481%
NEMETH_TNF_UP	NEMETH_TNF_UP		42	-0.105042025	-0.8142172	0.7068273	0.9598625	1.0	5228	tags=86%, list=75%, signal=345%
HSA04740_OLFACTORY_TRANSDUCTION	HSA04740_OLFACTORY_TRANSDUCTION		19	-0.15773511	-0.81312346	0.6826347	0.96013004	1.0	1467	tags=37%, list=21%, signal=47%
POTASSIUM_ION_TRANSPORT	POTASSIUM_ION_TRANSPORT		17	-0.16740121	-0.8130818	0.69052225	0.9583035	1.0	4560	tags=82%, list=66%, signal=239%
BRCA_ER_POS	BRCA_ER_POS		212	-0.04795736	-0.81289345	0.703252	0.95679754	1.0	3838	tags=60%, list=55%, signal=130%
OKUMURA_MC_LPS	OKUMURA_MC_LPS		98	-0.07134512	-0.8118486	0.6708075	0.95700145	1.0	1780	tags=33%, list=26%, signal=43%
GUANYL_NUCLEOTIDE_BINDING	GUANYL_NUCLEOTIDE_BINDING		19	-0.15547785	-0.8079565	0.6947791	0.9628226	1.0	3310	tags=63%, list=48%, signal=120%
STRUCTURAL_CONSTITUENT_OF_CYTOSKELETON	STRUCTURAL_CONSTITUENT_OF_CYTOSKELETON		18	-0.15980041	-0.8063455	0.6752988	0.9640284	1.0	2752	tags=56%, list=40%, signal=92%
SIG_IL4RECEPTOR_IN_B_LYPHOCYTES	SIG_IL4RECEPTOR_IN_B_LYPHOCYTES		15	-0.1685188	-0.8047891	0.6988189	0.96517557	1.0	1148	tags=33%, list=17%, signal=40%
DRUG_RESISTANCE_AND_METABOLISM	DRUG_RESISTANCE_AND_METABOLISM		42	-0.10562157	-0.80361074	0.694165	0.96561295	1.0	5224	tags=86%, list=75%, signal=344%
GUANYL_NUCLEOTIDE_EXCHANGE_FACTOR_ACTIVITY	GUANYL_NUCLEOTIDE_EXCHANGE_FACTOR_ACTIVITY		15	-0.17060664	-0.80330116	0.6944444	0.9643122	1.0	4837	tags=87%, list=70%, signal=285%
MEMBRANE_BOUND_VESICLE	MEMBRANE_BOUND_VESICLE		53	-0.09096908	-0.8028198	0.743215	0.96327996	1.0	5401	tags=87%, list=78%, signal=388%
SANSOM_APC_LOSS4_UP	SANSOM_APC_LOSS4_UP		47	-0.09959617	-0.80251694	0.6913319	0.9619872	1.0	1678	tags=34%, list=24%, signal=45%
LEE_MYC_E2F1_DN	LEE_MYC_E2F1_DN		26	-0.13456532	-0.80116963	0.71252567	0.9627439	1.0	2275	tags=46%, list=33%, signal=68%
LEE_TCELLS3_UP	LEE_TCELLS3_UP		46	-0.0996634	-0.8003423	0.71800435	0.9624125	1.0	1125	tags=26%, list=16%, signal=31%
GOLDRATH_MEMORY	GOLDRATH_MEMORY		25	-0.13455701	-0.7998435	0.7145709	0.9614595	1.0	6014	tags=100%, list=87%, signal=744%
EMBRYONIC_DEVELOPMENT	EMBRYONIC_DEVELOPMENT		29	-0.12444214	-0.7998326	0.6962025	0.9596237	1.0	3690	tags=66%, list=53%, signal=139%
TNFALPHA_ALL_UP	TNFALPHA_ALL_UP		26	-0.13244155	-0.79982245	0.73511297	0.95778567	1.0	3358	tags=62%, list=48%, signal=119%
NAB_LUNG_DN	NAB_LUNG_DN		21	-0.14685348	-0.798902	0.70788914	0.957711	1.0	4275	tags=76%, list=62%, signal=198%
HDACI_COLON_BUT_DN	HDACI_COLON_BUT_DN		118	-0.06311612	-0.79852855	0.6967213	0.956591	1.0	2336	tags=40%, list=34%, signal=59%
HSA04720_LONG_TERM_POTENTIATION	HSA04720_LONG_TERM_POTENTIATION		39	-0.1098498	-0.79718274	0.71097046	0.95720893	1.0	1023	tags=26%, list=15%, signal=30%
CELL_SURFACE_RECEPTOR_LINKED_SIGNAL_TRANSDUCTION_GO_0007166	CELL_SURFACE_RECEPTOR_LINKED_SIGNAL_TRANSDUCTION_GO_0007166		263	-0.043167077	-0.79656434	0.73558646	0.9565217	1.0	4914	tags=75%, list=71%, signal=247%
RESPONSE_TO_VIRUS	RESPONSE_TO_VIRUS		20	-0.15233967	-0.7951918	0.7222222	0.95735216	1.0	3807	tags=70%, list=55%, signal=155%
GTP_BINDING	GTP_BINDING		19	-0.15547785	-0.795164	0.7117647	0.95559466	1.0	3310	tags=63%, list=48%, signal=120%
PROTEIN_RNA_COMPLEX_ASSEMBLY	PROTEIN_RNA_COMPLEX_ASSEMBLY		33	-0.11477971	-0.7949428	0.74206346	0.954202	1.0	1312	tags=30%, list=19%, signal=37%
SHEPARD_POS_REG_OF_CELL_PROLIFERATION	SHEPARD_POS_REG_OF_CELL_PROLIFERATION		43	-0.10010007	-0.7939117	0.7131783	0.9543835	1.0	2217	tags=42%, list=32%, signal=61%
HSA05120_EPITHELIAL_CELL_SIGNALING_IN_HELICOBACTER_PYLORI_INFECTION	HSA05120_EPITHELIAL_CELL_SIGNALING_IN_HELICOBACTER_PYLORI_INFECTION		25	-0.13379389	-0.79370874	0.742115	0.95290804	1.0	5186	tags=88%, list=75%, signal=346%
TRANSFERASE_ACTIVITY__TRANSFERRING_ONE_CARBON_GROUPS	TRANSFERASE_ACTIVITY__TRANSFERRING_ONE_CARBON_GROUPS		15	-0.16925001	-0.7894772	0.7128713	0.959046	1.0	680	tags=27%, list=10%, signal=29%
GENERATION_OF_NEURONS	GENERATION_OF_NEURONS		32	-0.11877894	-0.78944594	0.73293173	0.95730174	1.0	5690	tags=94%, list=82%, signal=517%
ESTABLISHMENT_OF_PROTEIN_LOCALIZATION	ESTABLISHMENT_OF_PROTEIN_LOCALIZATION		78	-0.07702393	-0.78828984	0.7480159	0.95771104	1.0	2410	tags=42%, list=35%, signal=64%
HSA04514_CELL_ADHESION_MOLECULES	HSA04514_CELL_ADHESION_MOLECULES		49	-0.09729619	-0.7878647	0.7356322	0.95670754	1.0	4857	tags=80%, list=70%, signal=263%
TOLLPATHWAY	TOLLPATHWAY		15	-0.16284217	-0.78341323	0.7067961	0.9630963	1.0	3502	tags=67%, list=50%, signal=134%
STEMCELL_COMMON_UP	STEMCELL_COMMON_UP		91	-0.069952525	-0.7831985	0.75757575	0.961682	1.0	1353	tags=26%, list=19%, signal=32%
ANION_TRANSMEMBRANE_TRANSPORTER_ACTIVITY	ANION_TRANSMEMBRANE_TRANSPORTER_ACTIVITY		20	-0.14659153	-0.7830998	0.7470588	0.9600667	1.0	2458	tags=50%, list=35%, signal=77%
CHAUVIN_ANDROGEN_REGULATED_GENES	CHAUVIN_ANDROGEN_REGULATED_GENES		17	-0.15622585	-0.78275496	0.7192623	0.958968	1.0	3412	tags=65%, list=49%, signal=127%
CYTOSKELETAL_PART	CYTOSKELETAL_PART		97	-0.0689564	-0.78190595	0.7386831	0.9587121	1.0	3323	tags=55%, list=48%, signal=103%
TSA_PANC50_UP	TSA_PANC50_UP		15	-0.16545919	-0.7816102	0.7096774	0.95747095	1.0	2558	tags=53%, list=37%, signal=84%
RAS_ONCOGENIC_SIGNATURE	RAS_ONCOGENIC_SIGNATURE		122	-0.060827866	-0.779631	0.7326531	0.9592703	1.0	1692	tags=30%, list=24%, signal=39%
UVC_XPCS_8HR_UP	UVC_XPCS_8HR_UP		21	-0.14276084	-0.7791307	0.75775194	0.9584181	1.0	666	tags=24%, list=10%, signal=26%
SHEPARD_CRASH_AND_BURN_MUT_VS_WT_DN	SHEPARD_CRASH_AND_BURN_MUT_VS_WT_DN		66	-0.082084246	-0.7780482	0.71546394	0.95850444	1.0	2698	tags=47%, list=39%, signal=76%
CELL_CYCLE_KEGG	CELL_CYCLE_KEGG		35	-0.11272254	-0.7765176	0.7592955	0.9594572	1.0	4579	tags=77%, list=66%, signal=225%
SHEPARD_CELL_PROLIFERATION	SHEPARD_CELL_PROLIFERATION		78	-0.07249026	-0.7718665	0.7703549	0.96600556	1.0	1996	tags=36%, list=29%, signal=50%
GUO_HEX_UP	GUO_HEX_UP		42	-0.09803924	-0.7702207	0.75301206	0.96719986	1.0	1143	tags=26%, list=16%, signal=31%
HDACI_COLON_SUL24HRS_UP	HDACI_COLON_SUL24HRS_UP		32	-0.11414931	-0.7691887	0.7743902	0.9671591	1.0	4203	tags=72%, list=61%, signal=181%
NUCLEAR_LUMEN	NUCLEAR_LUMEN		160	-0.05285967	-0.7653902	0.7714286	0.972024	1.0	5892	tags=90%, list=85%, signal=580%
BRENTANI_PROTEIN_MODIFICATION	BRENTANI_PROTEIN_MODIFICATION		72	-0.07836956	-0.76528794	0.76459146	0.9704641	1.0	3706	tags=61%, list=53%, signal=130%
RORIE_ES_PNET_UP	RORIE_ES_PNET_UP		15	-0.16719104	-0.7649511	0.7313131	0.9693159	1.0	2546	tags=53%, list=37%, signal=84%
UVC_XPCS_ALL_UP	UVC_XPCS_ALL_UP		22	-0.13192454	-0.76425683	0.75	0.9687313	1.0	666	tags=23%, list=10%, signal=25%
SIG_PIP3_SIGNALING_IN_B_LYMPHOCYTES	SIG_PIP3_SIGNALING_IN_B_LYMPHOCYTES		15	-0.16262087	-0.7629985	0.75944334	0.9692145	1.0	263	tags=20%, list=4%, signal=21%
NAKAJIMA_MCS_UP	NAKAJIMA_MCS_UP		32	-0.11299191	-0.7619408	0.7891566	0.969271	1.0	1824	tags=38%, list=26%, signal=51%
NUCLEAR_PART	NUCLEAR_PART		231	-0.04338033	-0.76193374	0.7752809	0.96752495	1.0	2295	tags=37%, list=33%, signal=54%
REGULATION_OF_DNA_METABOLIC_PROCESS	REGULATION_OF_DNA_METABOLIC_PROCESS		18	-0.15043151	-0.7605961	0.743487	0.96810013	1.0	888	tags=28%, list=13%, signal=32%
CELL_PROLIFERATION	CELL_PROLIFERATION		78	-0.07249026	-0.7598161	0.7645875	0.9676101	1.0	1996	tags=36%, list=29%, signal=50%
ADIP_DIFF_UP	ADIP_DIFF_UP		23	-0.13272771	-0.75899786	0.76073617	0.9672055	1.0	3913	tags=70%, list=56%, signal=159%
BYSTRYKH_HSC_BRAIN_TRANS_GLOCUS	BYSTRYKH_HSC_BRAIN_TRANS_GLOCUS		58	-0.08436909	-0.75738573	0.75452715	0.9682242	1.0	4209	tags=69%, list=61%, signal=174%
TRYPTOPHAN_METABOLISM	TRYPTOPHAN_METABOLISM		17	-0.15216671	-0.7567674	0.7714286	0.96747124	1.0	5074	tags=88%, list=73%, signal=327%
GALE_FLT3ANDAPL_UP	GALE_FLT3ANDAPL_UP		23	-0.1340281	-0.75656027	0.7690763	0.9661368	1.0	3904	tags=70%, list=56%, signal=158%
MICROTUBULE_ORGANIZING_CENTER	MICROTUBULE_ORGANIZING_CENTER		32	-0.11212385	-0.75651014	0.7640232	0.9645214	1.0	4651	tags=78%, list=67%, signal=235%
PROTEIN_C_TERMINUS_BINDING	PROTEIN_C_TERMINUS_BINDING		33	-0.10813241	-0.7550229	0.7988615	0.9652751	1.0	5356	tags=88%, list=77%, signal=382%
HYPOPHYSECTOMY_RAT_DN	HYPOPHYSECTOMY_RAT_DN		16	-0.1540127	-0.7549897	0.790927	0.9636176	1.0	5444	tags=94%, list=78%, signal=433%
PROTEIN_FOLDING	PROTEIN_FOLDING		23	-0.12865694	-0.75485575	0.784	0.96213657	1.0	4545	tags=78%, list=65%, signal=226%
SMALL_GTPASE_REGULATOR_ACTIVITY	SMALL_GTPASE_REGULATOR_ACTIVITY		27	-0.12051895	-0.75250673	0.76553106	0.9641956	1.0	5597	tags=93%, list=81%, signal=475%
ENZYME_ACTIVATOR_ACTIVITY	ENZYME_ACTIVATOR_ACTIVITY		57	-0.082374886	-0.75108993	0.8235294	0.96491903	1.0	1992	tags=37%, list=29%, signal=51%
PROTEIN_LOCALIZATION	PROTEIN_LOCALIZATION		87	-0.067723386	-0.7499255	0.75051546	0.96520764	1.0	2410	tags=41%, list=35%, signal=63%
AS3_FIBRO_DN	AS3_FIBRO_DN		18	-0.14675778	-0.74877197	0.7809331	0.9654622	1.0	5157	tags=89%, list=74%, signal=345%
CMV_HCMV_TIMECOURSE_48HRS_UP	CMV_HCMV_TIMECOURSE_48HRS_UP		34	-0.108632036	-0.7466067	0.7862745	0.96735966	1.0	680	tags=21%, list=10%, signal=23%
JECHLINGER_EMT_UP	JECHLINGER_EMT_UP		19	-0.14313509	-0.7459676	0.79358715	0.9667069	1.0	3030	tags=58%, list=44%, signal=102%
HSA04670_LEUKOCYTE_TRANSENDOTHELIAL_MIGRATION	HSA04670_LEUKOCYTE_TRANSENDOTHELIAL_MIGRATION		45	-0.0924063	-0.74475616	0.8015267	0.9669467	1.0	5073	tags=82%, list=73%, signal=303%
CYTOPLASMIC_MEMBRANE_BOUND_VESICLE	CYTOPLASMIC_MEMBRANE_BOUND_VESICLE		52	-0.0883968	-0.74087965	0.784585	0.97148484	1.0	5401	tags=87%, list=78%, signal=387%
CELLULAR_DEFENSE_RESPONSE	CELLULAR_DEFENSE_RESPONSE		22	-0.13208215	-0.7407852	0.7950311	0.9699113	1.0	3190	tags=59%, list=46%, signal=109%
HDACI_COLON_TSA_DN	HDACI_COLON_TSA_DN		33	-0.107799165	-0.7398055	0.8148893	0.96977216	1.0	6200	tags=100%, list=89%, signal=929%
PROTEIN_UBIQUITINATION	PROTEIN_UBIQUITINATION		26	-0.12251205	-0.7382939	0.7816764	0.9705397	1.0	4495	tags=77%, list=65%, signal=217%
ZHAN_MM_CD138_PR_VS_REST	ZHAN_MM_CD138_PR_VS_REST		17	-0.14970405	-0.7373606	0.78811884	0.9702797	1.0	5908	tags=100%, list=85%, signal=669%
XPB_TTD-CS_UP	XPB_TTD-CS_UP		16	-0.15415704	-0.7343931	0.796	0.9732621	1.0	4141	tags=75%, list=60%, signal=185%
PARK_MSCS_DIFF	PARK_MSCS_DIFF		15	-0.15740608	-0.731702	0.79383427	0.97574866	1.0	1225	tags=33%, list=18%, signal=40%
PASSERINI_PROLIFERATION	PASSERINI_PROLIFERATION		30	-0.11146465	-0.7287586	0.8061224	0.9786023	1.0	5017	tags=83%, list=72%, signal=299%
FRASOR_ER_UP	FRASOR_ER_UP		17	-0.14716497	-0.7287284	0.7956349	0.97697395	1.0	207	tags=18%, list=3%, signal=18%
HDACI_COLON_TSABUT_UP	HDACI_COLON_TSABUT_UP		34	-0.10423941	-0.7286178	0.82892054	0.9754689	1.0	2140	tags=41%, list=31%, signal=59%
CATABOLIC_PROCESS	CATABOLIC_PROCESS		71	-0.07261525	-0.7280529	0.81891346	0.97473586	1.0	2436	tags=42%, list=35%, signal=64%
PROTEIN_N_TERMINUS_BINDING	PROTEIN_N_TERMINUS_BINDING		15	-0.15588589	-0.7263715	0.80657643	0.9756447	1.0	4939	tags=87%, list=71%, signal=300%
HEMOPOIESIS	HEMOPOIESIS		26	-0.11804208	-0.72605985	0.77755904	0.9744674	1.0	1321	tags=31%, list=19%, signal=38%
TRANSCRIPTION_REPRESSOR_ACTIVITY	TRANSCRIPTION_REPRESSOR_ACTIVITY		78	-0.07015247	-0.725473	0.83567137	0.97369653	1.0	1834	tags=33%, list=26%, signal=45%
EMT_DN	EMT_DN		21	-0.13038662	-0.7242261	0.83870965	0.9740064	1.0	1413	tags=33%, list=20%, signal=42%
METAL_ION_TRANSMEMBRANE_TRANSPORTER_ACTIVITY	METAL_ION_TRANSMEMBRANE_TRANSPORTER_ACTIVITY		51	-0.08736908	-0.7238793	0.8319328	0.9728467	1.0	3075	tags=53%, list=44%, signal=94%
PENG_GLUCOSE_DN	PENG_GLUCOSE_DN		66	-0.07573552	-0.7233473	0.8122605	0.97197735	1.0	3899	tags=64%, list=56%, signal=144%
PURINE_NUCLEOTIDE_BINDING	PURINE_NUCLEOTIDE_BINDING		94	-0.062665	-0.7221376	0.81349206	0.9721656	1.0	2896	tags=48%, list=42%, signal=81%
TARTE_BCELL	TARTE_BCELL		17	-0.14412487	-0.71907604	0.82846004	0.97511405	1.0	1045	tags=29%, list=15%, signal=35%
HEARTFAILURE_ATRIA_DN	HEARTFAILURE_ATRIA_DN		52	-0.08587437	-0.71728486	0.8349901	0.9761381	1.0	5819	tags=92%, list=84%, signal=565%
HESS_HOXAANMEIS1_DN	HESS_HOXAANMEIS1_DN		27	-0.11569455	-0.7165728	0.8329897	0.9756098	1.0	5116	tags=85%, list=74%, signal=322%
NEURON_DIFFERENTIATION	NEURON_DIFFERENTIATION		29	-0.11223478	-0.7148084	0.8293173	0.9766173	1.0	5690	tags=93%, list=82%, signal=513%
HEMOPOIETIC_OR_LYMPHOID_ORGAN_DEVELOPMENT	HEMOPOIETIC_OR_LYMPHOID_ORGAN_DEVELOPMENT		26	-0.11804208	-0.7134744	0.81578946	0.9770686	1.0	1321	tags=31%, list=19%, signal=38%
HSC_MATURE_ADULT	HSC_MATURE_ADULT		157	-0.04979356	-0.7126703	0.81128407	0.9765457	1.0	3511	tags=55%, list=51%, signal=110%
REGULATION_OF_ORGANELLE_ORGANIZATION_AND_BIOGENESIS	REGULATION_OF_ORGANELLE_ORGANIZATION_AND_BIOGENESIS		20	-0.13359328	-0.71055365	0.8135246	0.97782254	1.0	4284	tags=75%, list=62%, signal=195%
PROTEIN_DOMAIN_SPECIFIC_BINDING	PROTEIN_DOMAIN_SPECIFIC_BINDING		23	-0.123612426	-0.70917416	0.8370221	0.9781458	1.0	4278	tags=74%, list=62%, signal=192%
ECTODERM_DEVELOPMENT	ECTODERM_DEVELOPMENT		17	-0.14339456	-0.7091173	0.85071576	0.9765657	1.0	1867	tags=41%, list=27%, signal=56%
ENDOMEMBRANE_SYSTEM	ENDOMEMBRANE_SYSTEM		93	-0.06339707	-0.70732534	0.84117645	0.97751373	1.0	5988	tags=92%, list=86%, signal=663%
SANA_TNFA_ENDOTHELIAL_DN	SANA_TNFA_ENDOTHELIAL_DN		30	-0.10970974	-0.70712173	0.82591873	0.97614723	1.0	2483	tags=47%, list=36%, signal=72%
HESS_HOXAANMEIS1_UP	HESS_HOXAANMEIS1_UP		27	-0.11569455	-0.7069994	0.80527383	0.9747276	1.0	5116	tags=85%, list=74%, signal=322%
CIS_XPC_UP	CIS_XPC_UP		63	-0.076894455	-0.7050582	0.8299595	0.9758414	1.0	2999	tags=51%, list=43%, signal=89%
GROWTH_FACTOR_BINDING	GROWTH_FACTOR_BINDING		15	-0.14802521	-0.7027901	0.83767533	0.9772906	1.0	1290	tags=33%, list=19%, signal=41%
FLOTHO_CASP8AP2_MRD_DIFF	FLOTHO_CASP8AP2_MRD_DIFF		35	-0.0990592	-0.7017927	0.82617587	0.9769711	1.0	507	tags=17%, list=7%, signal=18%
HSC_STHSC_SHARED	HSC_STHSC_SHARED		16	-0.14520785	-0.6999897	0.851145	0.97778654	1.0	5071	tags=88%, list=73%, signal=324%
ZHAN_MMPC_EARLYVS	ZHAN_MMPC_EARLYVS		22	-0.12353235	-0.696978	0.8349901	0.98019826	1.0	5143	tags=86%, list=74%, signal=332%
HSC_STHSC_FETAL	HSC_STHSC_FETAL		16	-0.14520785	-0.6958069	0.8689788	0.9800965	1.0	5071	tags=88%, list=73%, signal=324%
COLLAGEN	COLLAGEN		16	-0.14246535	-0.6954805	0.8514056	0.97890407	1.0	3354	tags=63%, list=48%, signal=121%
ORGANELLE_LUMEN	ORGANELLE_LUMEN		184	-0.044114996	-0.6948785	0.8687873	0.9780819	1.0	5892	tags=89%, list=85%, signal=573%
NEGATIVE_REGULATION_OF_CELLULAR_PROCESS	NEGATIVE_REGULATION_OF_CELLULAR_PROCESS		282	-0.036220048	-0.6946964	0.85490197	0.97673887	1.0	1902	tags=31%, list=27%, signal=41%
TPA_SENS_LATE_UP	TPA_SENS_LATE_UP		20	-0.12694974	-0.69178957	0.87096775	0.9791178	1.0	6066	tags=100%, list=87%, signal=789%
VHL_NORMAL_UP	VHL_NORMAL_UP		188	-0.04295946	-0.690361	0.85714287	0.9795033	1.0	5362	tags=81%, list=77%, signal=348%
IFN_GAMMA_UP	IFN_GAMMA_UP		16	-0.14693995	-0.6882829	0.8629857	0.98063385	1.0	4191	tags=75%, list=60%, signal=189%
HSA00280_VALINE_LEUCINE_AND_ISOLEUCINE_DEGRADATION	HSA00280_VALINE_LEUCINE_AND_ISOLEUCINE_DEGRADATION		17	-0.13615096	-0.6848278	0.84842104	0.98343414	1.0	4368	tags=76%, list=63%, signal=206%
CELL_SURFACE_RECEPTOR_LINKED_SIGNAL_TRANSDUCTION	CELL_SURFACE_RECEPTOR_LINKED_SIGNAL_TRANSDUCTION		52	-0.0817782	-0.6833274	0.86247545	0.9837426	1.0	5046	tags=81%, list=73%, signal=293%
CELL_MIGRATION	CELL_MIGRATION		42	-0.090843245	-0.6833064	0.86041665	0.9821772	1.0	5326	tags=86%, list=77%, signal=366%
TESTIS_EXPRESSED_GENES	TESTIS_EXPRESSED_GENES		21	-0.12224951	-0.6824292	0.8856016	0.98164725	1.0	4776	tags=81%, list=69%, signal=259%
MEMBRANE_ENCLOSED_LUMEN	MEMBRANE_ENCLOSED_LUMEN		184	-0.044114996	-0.6814877	0.860735	0.98129517	1.0	5892	tags=89%, list=85%, signal=573%
PLASMA_MEMBRANE_PART	PLASMA_MEMBRANE_PART		423	-0.029631866	-0.68066496	0.8674699	0.98076254	1.0	2697	tags=42%, list=39%, signal=64%
DNA_METABOLIC_PROCESS	DNA_METABOLIC_PROCESS		100	-0.05714202	-0.6784899	0.8795181	0.98196787	1.0	5304	tags=82%, list=76%, signal=342%
GTPASE_REGULATOR_ACTIVITY	GTPASE_REGULATOR_ACTIVITY		52	-0.07940086	-0.67760503	0.8956693	0.98148197	1.0	5463	tags=87%, list=79%, signal=403%
HDACI_COLON_BUT48HRS_DN	HDACI_COLON_BUT48HRS_DN		54	-0.0768478	-0.6756774	0.88612837	0.9822778	1.0	1529	tags=30%, list=22%, signal=38%
CHROMOSOME	CHROMOSOME		52	-0.08063975	-0.6751956	0.8722555	0.9812972	1.0	3852	tags=63%, list=55%, signal=141%
PROTEOLYSIS	PROTEOLYSIS		72	-0.065224424	-0.6736325	0.8831967	0.98157495	1.0	5243	tags=82%, list=76%, signal=331%
MANALO_HYPOXIA_UP	MANALO_HYPOXIA_UP		54	-0.077772394	-0.67347074	0.85714287	0.9801969	1.0	5509	tags=87%, list=79%, signal=418%
LEE_E2F1_DN	LEE_E2F1_DN		27	-0.10825716	-0.6720399	0.87789476	0.9804498	1.0	5939	tags=96%, list=86%, signal=663%
HSC_LTHSC_FETAL	HSC_LTHSC_FETAL		123	-0.052038	-0.6697355	0.884	0.98151845	1.0	2864	tags=46%, list=41%, signal=77%
HSC_LTHSC_SHARED	HSC_LTHSC_SHARED		123	-0.052038	-0.66928154	0.88724583	0.980487	1.0	2864	tags=46%, list=41%, signal=77%
IMMUNE_SYSTEM_DEVELOPMENT	IMMUNE_SYSTEM_DEVELOPMENT		27	-0.106618665	-0.6687492	0.88135594	0.9795325	1.0	1321	tags=30%, list=19%, signal=36%
ROME_INSULIN_2F_UP	ROME_INSULIN_2F_UP		76	-0.06546762	-0.66749585	0.88429755	0.97949576	1.0	2932	tags=49%, list=42%, signal=83%
PROTEIN_TARGETING	PROTEIN_TARGETING		44	-0.08735175	-0.6670009	0.8796296	0.9784696	1.0	3975	tags=66%, list=57%, signal=153%
NEUROGENESIS	NEUROGENESIS		35	-0.09549863	-0.66480774	0.90585774	0.97935367	1.0	5690	tags=91%, list=82%, signal=504%
VIRAL_REPRODUCTION	VIRAL_REPRODUCTION		19	-0.12436252	-0.6639279	0.8810484	0.9788421	1.0	3160	tags=58%, list=46%, signal=106%
UEDA_MOUSE_SCN	UEDA_MOUSE_SCN		43	-0.08768193	-0.66081315	0.8881857	0.98075145	1.0	5048	tags=81%, list=73%, signal=296%
BRG1_ALAB_DN	BRG1_ALAB_DN		24	-0.11396915	-0.6604958	0.87033397	0.979566	1.0	3263	tags=58%, list=47%, signal=110%
ENDOSOME	ENDOSOME		34	-0.094449684	-0.6603551	0.89979124	0.9781697	1.0	778	tags=21%, list=11%, signal=23%
HSC_STHSC_ADULT	HSC_STHSC_ADULT		19	-0.12508453	-0.65327543	0.9168357	0.9845642	1.0	3155	tags=58%, list=45%, signal=106%
FERRANDO_MLL_T_ALL_UP	FERRANDO_MLL_T_ALL_UP		33	-0.09443445	-0.6522922	0.9096509	0.9841063	1.0	3136	tags=55%, list=45%, signal=99%
REFRACTORY_GASTRIC_UP	REFRACTORY_GASTRIC_UP		25	-0.108177476	-0.64791787	0.9174664	0.98721176	1.0	5641	tags=92%, list=81%, signal=489%
BRCA1_OVEREXP_PROSTATE_UP	BRCA1_OVEREXP_PROSTATE_UP		67	-0.06810501	-0.64584005	0.891129	0.9878831	1.0	6373	tags=99%, list=92%, signal=1186%
ALCOHOL_METABOLIC_PROCESS	ALCOHOL_METABOLIC_PROCESS		29	-0.10073055	-0.6454356	0.88977957	0.98676467	1.0	6009	tags=97%, list=87%, signal=714%
CALCIUM_ION_BINDING	CALCIUM_ION_BINDING		33	-0.09312779	-0.6450772	0.8962076	0.9856137	1.0	4618	tags=76%, list=67%, signal=225%
CYSTEINE_TYPE_PEPTIDASE_ACTIVITY	CYSTEINE_TYPE_PEPTIDASE_ACTIVITY		19	-0.12323768	-0.6438111	0.8949416	0.98526853	1.0	244	tags=16%, list=4%, signal=16%
GH_EXOGENOUS_LATE_DN	GH_EXOGENOUS_LATE_DN		36	-0.0890594	-0.64247566	0.9092742	0.98515165	1.0	736	tags=19%, list=11%, signal=22%
ZHAN_MULTIPLE_MYELOMA_VS_NORMAL_UP	ZHAN_MULTIPLE_MYELOMA_VS_NORMAL_UP		20	-0.11880414	-0.6392758	0.8986083	0.9867921	1.0	3692	tags=65%, list=53%, signal=138%
WANG_MLL_CBP_VS_GMP_DN	WANG_MLL_CBP_VS_GMP_DN		18	-0.12550132	-0.6392406	0.91840607	0.9852932	1.0	5690	tags=94%, list=82%, signal=522%
HYPOXIA_RCC_NOVHL_UP	HYPOXIA_RCC_NOVHL_UP		17	-0.12922154	-0.6365841	0.9153226	0.98654157	1.0	4416	tags=76%, list=64%, signal=210%
GH_EXOGENOUS_ANY_DN	GH_EXOGENOUS_ANY_DN		42	-0.08514443	-0.63656986	0.9144603	0.9850297	1.0	736	tags=19%, list=11%, signal=21%
ALZHEIMERS_INCIPIENT_DN	ALZHEIMERS_INCIPIENT_DN		53	-0.07237222	-0.6351593	0.9342916	0.9849001	1.0	4481	tags=72%, list=65%, signal=201%
GAMMA_UNIQUE_FIBRO_DN	GAMMA_UNIQUE_FIBRO_DN		32	-0.09157987	-0.63259256	0.8986083	0.9859243	1.0	2406	tags=44%, list=35%, signal=67%
UVC_HIGH_D4_DN	UVC_HIGH_D4_DN		31	-0.09634028	-0.63211024	0.8983402	0.98483604	1.0	903	tags=23%, list=13%, signal=26%
VANTVEER_BREAST_OUTCOME_GOOD_VS_POOR_DN	VANTVEER_BREAST_OUTCOME_GOOD_VS_POOR_DN		32	-0.09273727	-0.6284338	0.9317739	0.98684776	1.0	2832	tags=50%, list=41%, signal=84%
LVAD_HEARTFAILURE_UP	LVAD_HEARTFAILURE_UP		36	-0.08870554	-0.62489915	0.92957747	0.98844653	1.0	1510	tags=31%, list=22%, signal=39%
HYDROLASE_ACTIVITY__ACTING_ON_ACID_ANHYDRIDES	HYDROLASE_ACTIVITY__ACTING_ON_ACID_ANHYDRIDES		98	-0.05504779	-0.6225355	0.9134809	0.98903245	1.0	5151	tags=80%, list=74%, signal=304%
APOPTOSIS_GO	APOPTOSIS_GO		155	-0.042775128	-0.62237716	0.9458918	0.9876577	1.0	1413	tags=25%, list=20%, signal=30%
VOLTAGE_GATED_CHANNEL_ACTIVITY	VOLTAGE_GATED_CHANNEL_ACTIVITY		31	-0.097063534	-0.6220873	0.92992425	0.98640513	1.0	2242	tags=42%, list=32%, signal=62%
ADIP_DIFF_CLUSTER1	ADIP_DIFF_CLUSTER1		22	-0.11179112	-0.6213957	0.9261477	0.9855677	1.0	4593	tags=77%, list=66%, signal=228%
PYROPHOSPHATASE_ACTIVITY	PYROPHOSPHATASE_ACTIVITY		98	-0.05504779	-0.6172721	0.916	0.9877244	1.0	5151	tags=80%, list=74%, signal=304%
HDACI_COLON_SUL12HRS_DN	HDACI_COLON_SUL12HRS_DN		19	-0.11800873	-0.6138677	0.91767067	0.98909926	1.0	3204	tags=58%, list=46%, signal=107%
ZHAN_MM_MOLECULAR_CLASSI_UP	ZHAN_MM_MOLECULAR_CLASSI_UP		22	-0.10735205	-0.60520977	0.93110234	0.994838	1.0	5255	tags=86%, list=76%, signal=354%
PROGRAMMED_CELL_DEATH	PROGRAMMED_CELL_DEATH		156	-0.04117373	-0.60449445	0.938856	0.99391896	1.0	1413	tags=24%, list=20%, signal=30%
POSITIVE_REGULATION_OF_CELLULAR_COMPONENT_ORGANIZATION_AND_BIOGENESIS	POSITIVE_REGULATION_OF_CELLULAR_COMPONENT_ORGANIZATION_AND_BIOGENESIS		15	-0.12918651	-0.59502494	0.93650794	0.99988717	1.0	5124	tags=87%, list=74%, signal=330%
NING_COPD_UP	NING_COPD_UP		40	-0.07885283	-0.5943707	0.9698189	0.9988595	1.0	5359	tags=85%, list=77%, signal=370%
STRIATED_MUSCLE_DEVELOPMENT	STRIATED_MUSCLE_DEVELOPMENT		16	-0.12240184	-0.59265715	0.946	0.9986275	1.0	3493	tags=63%, list=50%, signal=125%
BAF57_BT549_UP	BAF57_BT549_UP		132	-0.044173364	-0.5915457	0.962	0.99794745	1.0	2383	tags=39%, list=34%, signal=58%
LIPID_BIOSYNTHETIC_PROCESS	LIPID_BIOSYNTHETIC_PROCESS		34	-0.08770751	-0.59115267	0.9450102	0.9967272	1.0	5522	tags=88%, list=80%, signal=429%
CELL_PROLIFERATION_GO_0008283	CELL_PROLIFERATION_GO_0008283		199	-0.036621954	-0.58919656	0.94411176	0.9966414	1.0	4709	tags=71%, list=68%, signal=215%
PROTEIN_MODIFICATION_BY_SMALL_PROTEIN_CONJUGATION	PROTEIN_MODIFICATION_BY_SMALL_PROTEIN_CONJUGATION		27	-0.09392853	-0.586811	0.9550781	0.99683714	1.0	4495	tags=74%, list=65%, signal=209%
OXIDOREDUCTASE_ACTIVITY	OXIDOREDUCTASE_ACTIVITY		90	-0.051600046	-0.5860363	0.9678801	0.99584395	1.0	1962	tags=33%, list=28%, signal=46%
AS3_FIBRO_C4	AS3_FIBRO_C4		15	-0.12442392	-0.58445317	0.938247	0.99539936	1.0	5157	tags=87%, list=74%, signal=336%
HDACI_COLON_SUL30MIN_DN	HDACI_COLON_SUL30MIN_DN		28	-0.092539035	-0.58013284	0.95555556	0.996685	1.0	3081	tags=54%, list=44%, signal=96%
MATSUDA_VALPHAINKT_DIFF	MATSUDA_VALPHAINKT_DIFF		177	-0.037469935	-0.57828647	0.9802371	0.9964493	1.0	689	tags=14%, list=10%, signal=15%
MICROTUBULE_ASSOCIATED_COMPLEX	MICROTUBULE_ASSOCIATED_COMPLEX		19	-0.109861284	-0.57773393	0.95931476	0.9953508	1.0	2164	tags=42%, list=31%, signal=61%
ION_CHANNEL_ACTIVITY	ION_CHANNEL_ACTIVITY		48	-0.07100731	-0.5755726	0.9692308	0.9952073	1.0	2694	tags=46%, list=39%, signal=74%
HSC_EARLYPROGENITORS_ADULT	HSC_EARLYPROGENITORS_ADULT		190	-0.03519005	-0.57010883	0.97020483	0.99696195	1.0	2212	tags=35%, list=32%, signal=50%
OXSTRESS_RPE_HNETBH_DN	OXSTRESS_RPE_HNETBH_DN		15	-0.11983451	-0.5617867	0.97330594	1.0	1.0	3800	tags=67%, list=55%, signal=147%
CALRES_RHESUS_UP	CALRES_RHESUS_UP		24	-0.095327534	-0.5614343	0.9693251	0.99896157	1.0	4260	tags=71%, list=61%, signal=183%
LAL_KO_3MO_UP	LAL_KO_3MO_UP		16	-0.115184754	-0.557098	0.98050684	0.99987936	1.0	939	tags=25%, list=14%, signal=29%
HSA00240_PYRIMIDINE_METABOLISM	HSA00240_PYRIMIDINE_METABOLISM		31	-0.08361063	-0.55666447	0.9628866	0.998631	1.0	1215	tags=26%, list=17%, signal=31%
BLEO_HUMAN_LYMPH_HIGH_24HRS_UP	BLEO_HUMAN_LYMPH_HIGH_24HRS_UP		38	-0.07644766	-0.5563712	0.9792961	0.9973067	1.0	204	tags=11%, list=3%, signal=11%
NF90_DN	NF90_DN		21	-0.09990851	-0.5464062	0.96819085	1.0	1.0	1624	tags=33%, list=23%, signal=43%
PENG_GLUTAMINE_DN	PENG_GLUTAMINE_DN		91	-0.04913065	-0.5458625	0.985138	0.99940634	1.0	4548	tags=70%, list=65%, signal=201%
NOUZOVA_CPG_H4_UP	NOUZOVA_CPG_H4_UP		41	-0.069174595	-0.54084235	0.9897541	1.0	1.0	3927	tags=63%, list=57%, signal=145%
VIRAL_INFECTIOUS_CYCLE	VIRAL_INFECTIOUS_CYCLE		15	-0.11243566	-0.5327122	0.9800399	1.0	1.0	5703	tags=93%, list=82%, signal=521%
BRG1_H1299_UP	BRG1_H1299_UP		17	-0.10525735	-0.52745557	0.98203593	1.0	1.0	4582	tags=76%, list=66%, signal=224%
CMV_HCMV_TIMECOURSE_4HRS_DN	CMV_HCMV_TIMECOURSE_4HRS_DN		17	-0.10721898	-0.52644813	0.979716	1.0	1.0	3343	tags=59%, list=48%, signal=113%
NGUYEN_KERATO_DN	NGUYEN_KERATO_DN		39	-0.071107894	-0.52091056	0.98039216	1.0	1.0	6454	tags=100%, list=93%, signal=1409%
HPV31_UP	HPV31_UP		28	-0.081550024	-0.51091695	0.98031497	1.0	1.0	3901	tags=64%, list=56%, signal=146%
ORGANELLE_MEMBRANE	ORGANELLE_MEMBRANE		116	-0.040189486	-0.510757	0.990099	1.0	1.0	4755	tags=72%, list=68%, signal=226%
LEE_MYC_UP	LEE_MYC_UP		18	-0.099239565	-0.5006669	0.981203	1.0	1.0	3943	tags=67%, list=57%, signal=154%
MAMMARY_DEV_UP	MAMMARY_DEV_UP		23	-0.086152405	-0.49907735	0.9802761	1.0	1.0	5443	tags=87%, list=78%, signal=401%
VIRAL_REPRODUCTIVE_PROCESS	VIRAL_REPRODUCTIVE_PROCESS		17	-0.101758674	-0.49763015	0.99	1.0	1.0	930	tags=24%, list=13%, signal=27%
MRNA_PROCESSING	MRNA_PROCESSING		23	-0.08461954	-0.49370676	0.98479086	1.0	1.0	623	tags=17%, list=9%, signal=19%
H2O2_CSBDIFF_C1	H2O2_CSBDIFF_C1		17	-0.09985648	-0.48430154	0.99185336	1.0	1.0	3394	tags=59%, list=49%, signal=115%
NEGATIVE_REGULATION_OF_CELL_DIFFERENTIATION	NEGATIVE_REGULATION_OF_CELL_DIFFERENTIATION		17	-0.096001156	-0.48393103	0.9940711	0.999622	1.0	6280	tags=100%, list=90%, signal=1043%
NUCLEOPLASM	NUCLEOPLASM		130	-0.036948815	-0.48043337	0.99424183	0.9987643	1.0	5892	tags=88%, list=85%, signal=573%
HSC_EARLYPROGENITORS_SHARED	HSC_EARLYPROGENITORS_SHARED		187	-0.029996974	-0.4799793	0.9940945	0.99739695	1.0	2212	tags=35%, list=32%, signal=50%
REGULATION_OF_CELL_DIFFERENTIATION	REGULATION_OF_CELL_DIFFERENTIATION		32	-0.071325235	-0.47769862	0.9895178	0.99638927	1.0	159	tags=9%, list=2%, signal=10%
HSC_EARLYPROGENITORS_FETAL	HSC_EARLYPROGENITORS_FETAL		187	-0.029996974	-0.4742105	0.99239546	0.9954882	1.0	2212	tags=35%, list=32%, signal=50%
HCC_SURVIVAL_GOOD_VS_POOR_UP	HCC_SURVIVAL_GOOD_VS_POOR_UP		31	-0.065094784	-0.43796745	1.0	0.99786913	1.0	1791	tags=32%, list=26%, signal=43%
