# Supplementary material for: Signatures of RNA binding proteins globally coupled to effective microRNA target sites
Source: HighWire-hosted journal article supplement (doi:10.1101/gr.103259.109), 2010-05-27
Supplement: Table_S13.zip [file gsea_report_for_na_pos_1266579792105.xls]

NAME	GS<br> follow link to MSigDB	GS DETAILS	SIZE	ES	NES	NOM p-val	FDR q-val	FWER p-val	RANK AT MAX	LEADING EDGE
CHESLER_HIGHEST_FOLD_RANGE_GENES	CHESLER_HIGHEST_FOLD_RANGE_GENES	Details ...	22	0.46020594	2.6325927	0.0	0.035971165	0.035	1548	tags=68%, list=22%, signal=87%
LIN_WNT_UP	LIN_WNT_UP	Details ...	16	0.5138568	2.4312673	0.0	0.11408075	0.204	2081	tags=81%, list=30%, signal=116%
VHL_RCC_UP	VHL_RCC_UP	Details ...	39	0.30694962	2.272601	0.0	0.2265886	0.481	3043	tags=74%, list=44%, signal=132%
ST_P38_MAPK_PATHWAY	ST_P38_MAPK_PATHWAY	Details ...	17	0.4483479	2.24695	0.0	0.1998171	0.532	978	tags=59%, list=14%, signal=68%
BRCA1_OVEREXP_DN	BRCA1_OVEREXP_DN	Details ...	32	0.31944445	2.1524825	0.002016129	0.29766968	0.75	4301	tags=94%, list=62%, signal=245%
WALKER_MM_SNP_DIFF	WALKER_MM_SNP_DIFF	Details ...	20	0.39286542	2.1099167	0.0041753654	0.33071285	0.835	2834	tags=80%, list=41%, signal=135%
BRCA_BRCA1_POS	BRCA_BRCA1_POS	Details ...	40	0.26958287	2.0064971	0.0020283975	0.54075176	0.976	2825	tags=68%, list=41%, signal=113%
CMV_8HRS_DN	CMV_8HRS_DN	Details ...	24	0.338343	2.0043414	0.003929273	0.47854227	0.977	4023	tags=92%, list=58%, signal=217%
CELL_PROJECTION	CELL_PROJECTION	Details ...	48	0.23815742	1.9634967	0.003929273	0.54254717	0.997	2552	tags=60%, list=37%, signal=95%
LINDSTEDT_DEND_UP	LINDSTEDT_DEND_UP	Details ...	21	0.3533632	1.9370104	0.009451796	0.56307083	0.999	3174	tags=81%, list=46%, signal=149%
HSA04340_HEDGEHOG_SIGNALING_PATHWAY	HSA04340_HEDGEHOG_SIGNALING_PATHWAY	Details ...	25	0.31759503	1.9114755	0.01509434	0.5952346	1.0	3079	tags=76%, list=44%, signal=136%
BRENTANI_TRANSCRIPTION_FACTORS	BRENTANI_TRANSCRIPTION_FACTORS	Details ...	32	0.2867477	1.9048431	0.009541985	0.5653656	1.0	2140	tags=59%, list=31%, signal=85%
RNA_POLYMERASE_II_TRANSCRIPTION_FACTOR_ACTIVITY	RNA_POLYMERASE_II_TRANSCRIPTION_FACTOR_ACTIVITY	Details ...	92	0.17221886	1.8888205	0.004149378	0.56852317	1.0	2140	tags=48%, list=31%, signal=68%
PROTEIN_COMPLEX_ASSEMBLY	PROTEIN_COMPLEX_ASSEMBLY	Details ...	78	0.18492831	1.8701591	0.013084112	0.5889821	1.0	4694	tags=86%, list=68%, signal=262%
SPECIFIC_RNA_POLYMERASE_II_TRANSCRIPTION_FACTOR_ACTIVITY	SPECIFIC_RNA_POLYMERASE_II_TRANSCRIPTION_FACTOR_ACTIVITY	Details ...	17	0.3657555	1.8556954	0.008316008	0.5939429	1.0	3184	tags=82%, list=46%, signal=152%
TRANSCRIPTION_FROM_RNA_POLYMERASE_II_PROMOTER	TRANSCRIPTION_FROM_RNA_POLYMERASE_II_PROMOTER	Details ...	240	0.10365952	1.854345	0.005964215	0.5614485	1.0	3239	tags=57%, list=47%, signal=103%
MOREAUX_TACI_HI_VS_LOW_UP	MOREAUX_TACI_HI_VS_LOW_UP	Details ...	131	0.14101468	1.8495463	0.015086207	0.5432296	1.0	4127	tags=73%, list=59%, signal=177%
HSA04320_DORSO_VENTRAL_AXIS_FORMATION	HSA04320_DORSO_VENTRAL_AXIS_FORMATION	Details ...	17	0.3711054	1.8478177	0.016161617	0.5174601	1.0	2330	tags=71%, list=34%, signal=106%
LEADING_EDGE	LEADING_EDGE	Details ...	23	0.32598963	1.8346543	0.018072288	0.52624965	1.0	4083	tags=91%, list=59%, signal=221%
UVB_NHEK3_C7	UVB_NHEK3_C7	Details ...	16	0.380485	1.8241899	0.009615385	0.52925503	1.0	3873	tags=94%, list=56%, signal=211%
MENSE_HYPOXIA_UP	MENSE_HYPOXIA_UP		44	0.23172598	1.8060231	0.014	0.55377764	1.0	1083	tags=39%, list=16%, signal=45%
REGULATION_OF_HYDROLASE_ACTIVITY	REGULATION_OF_HYDROLASE_ACTIVITY		34	0.2619307	1.804399	0.019646365	0.5334768	1.0	2478	tags=62%, list=36%, signal=96%
COAGULATION	COAGULATION		19	0.33438724	1.7776809	0.021442495	0.5881846	1.0	2800	tags=74%, list=40%, signal=123%
ST_INTEGRIN_SIGNALING_PATHWAY	ST_INTEGRIN_SIGNALING_PATHWAY		39	0.24689281	1.7769525	0.021526419	0.5659072	1.0	4526	tags=90%, list=65%, signal=256%
HDACI_COLON_CLUSTER10	HDACI_COLON_CLUSTER10		22	0.3109585	1.745849	0.0251938	0.6347326	1.0	3528	tags=82%, list=51%, signal=166%
CMV_ALL_DN	CMV_ALL_DN		52	0.2049757	1.734884	0.026	0.6445047	1.0	4462	tags=85%, list=64%, signal=235%
OLD_FIBRO_UP	OLD_FIBRO_UP		28	0.27862927	1.7344575	0.026476579	0.6221449	1.0	2040	tags=57%, list=29%, signal=81%
E2F3_ONCOGENIC_SIGNATURE	E2F3_ONCOGENIC_SIGNATURE		116	0.14000161	1.7341734	0.020325202	0.6010186	1.0	3413	tags=63%, list=49%, signal=122%
MUNSHI_MM_VS_PCS_UP	MUNSHI_MM_VS_PCS_UP		24	0.29696533	1.7259542	0.025641026	0.6051437	1.0	2284	tags=63%, list=33%, signal=93%
RHO_PROTEIN_SIGNAL_TRANSDUCTION	RHO_PROTEIN_SIGNAL_TRANSDUCTION		15	0.360687	1.716538	0.03125	0.61417145	1.0	3055	tags=80%, list=44%, signal=143%
BLOOD_COAGULATION	BLOOD_COAGULATION		19	0.33438724	1.7147247	0.017307693	0.599734	1.0	2800	tags=74%, list=40%, signal=123%
CARBOHYDRATE_BIOSYNTHETIC_PROCESS	CARBOHYDRATE_BIOSYNTHETIC_PROCESS		20	0.31805316	1.7145177	0.034552846	0.5815956	1.0	1616	tags=55%, list=23%, signal=71%
LIAN_MYELOID_DIFF_TF	LIAN_MYELOID_DIFF_TF		18	0.33373442	1.7036533	0.02414487	0.59480387	1.0	3860	tags=89%, list=56%, signal=200%
GOLDRATH_HP	GOLDRATH_HP		75	0.16676472	1.6983932	0.03256705	0.59354466	1.0	3668	tags=69%, list=53%, signal=145%
PROTEIN_SERINE_THREONINE_PHOSPHATASE_ACTIVITY	PROTEIN_SERINE_THREONINE_PHOSPHATASE_ACTIVITY		16	0.35103926	1.6981317	0.034749035	0.5770592	1.0	1473	tags=56%, list=21%, signal=71%
HEMOSTASIS	HEMOSTASIS		20	0.3172444	1.6971908	0.023157895	0.5639653	1.0	4052	tags=90%, list=58%, signal=215%
ENZYME_LINKED_RECEPTOR_PROTEIN_SIGNALING_PATHWAY	ENZYME_LINKED_RECEPTOR_PROTEIN_SIGNALING_PATHWAY		85	0.1582275	1.6947877	0.035856575	0.55541784	1.0	4714	tags=84%, list=68%, signal=257%
TCELL_ANERGIC_UP	TCELL_ANERGIC_UP		36	0.23811361	1.6908735	0.029296875	0.5508396	1.0	3755	tags=78%, list=54%, signal=168%
ZHAN_MM_MOLECULAR_CLASSI_DN	ZHAN_MM_MOLECULAR_CLASSI_DN		27	0.27100167	1.6901563	0.03368421	0.53844994	1.0	3011	tags=70%, list=43%, signal=124%
PASSERINI_TRANSCRIPTION	PASSERINI_TRANSCRIPTION		37	0.2316295	1.6896963	0.029761905	0.52639943	1.0	2528	tags=59%, list=36%, signal=93%
RECEPTOR_COMPLEX	RECEPTOR_COMPLEX		21	0.3068034	1.6859478	0.03557312	0.5230071	1.0	2835	tags=71%, list=41%, signal=120%
ELECTRON_TRANSPORT_GO_0006118	ELECTRON_TRANSPORT_GO_0006118		16	0.34974018	1.6839335	0.022944551	0.5155379	1.0	2350	tags=69%, list=34%, signal=104%
KERATINOCYTEPATHWAY	KERATINOCYTEPATHWAY		22	0.2956844	1.677673	0.036144577	0.5208627	1.0	4265	tags=91%, list=61%, signal=235%
GOLGI_VESICLE_TRANSPORT	GOLGI_VESICLE_TRANSPORT		19	0.32226488	1.6688775	0.0407767	0.5315583	1.0	2153	tags=63%, list=31%, signal=91%
WOUND_HEALING	WOUND_HEALING		23	0.2932537	1.6605334	0.036679536	0.54253966	1.0	2800	tags=70%, list=40%, signal=116%
STRESS_TPA_SPECIFIC_UP	STRESS_TPA_SPECIFIC_UP		20	0.29881573	1.6508152	0.037656903	0.5565281	1.0	3138	tags=75%, list=45%, signal=136%
POSITIVE_REGULATION_OF_BIOLOGICAL_PROCESS	POSITIVE_REGULATION_OF_BIOLOGICAL_PROCESS		298	0.085649766	1.6277071	0.03992016	0.60855603	1.0	3228	tags=55%, list=46%, signal=98%
HSA04664_FC_EPSILON_RI_SIGNALING_PATHWAY	HSA04664_FC_EPSILON_RI_SIGNALING_PATHWAY		32	0.23683448	1.6233851	0.021367522	0.60814893	1.0	3353	tags=72%, list=48%, signal=138%
NUCLEAR_BODY	NUCLEAR_BODY		17	0.32713422	1.6224401	0.037549406	0.5985714	1.0	3860	tags=88%, list=56%, signal=198%
APOPTOTIC_PROGRAM	APOPTOTIC_PROGRAM		20	0.30493936	1.619208	0.03807615	0.5951156	1.0	2054	tags=60%, list=30%, signal=85%
POSITIVE_REGULATION_OF_CELLULAR_PROCESS	POSITIVE_REGULATION_OF_CELLULAR_PROCESS		287	0.08193465	1.6093693	0.03522505	0.6116601	1.0	3228	tags=54%, list=46%, signal=97%
HSA05215_PROSTATE_CANCER	HSA05215_PROSTATE_CANCER		51	0.19463058	1.606791	0.0455408	0.60702944	1.0	4376	tags=82%, list=63%, signal=221%
REGULATION_OF_NUCLEOBASE__NUCLEOSIDE__NUCLEOTIDE_AND_NUCLEIC_ACID_METABOLIC_PROCESS	REGULATION_OF_NUCLEOBASE__NUCLEOSIDE__NUCLEOTIDE_AND_NUCLEIC_ACID_METABOLIC_PROCESS		334	0.078565426	1.600081	0.038539555	0.6150206	1.0	1829	tags=34%, list=26%, signal=44%
IDX_TSA_DN_CLUSTER6	IDX_TSA_DN_CLUSTER6		18	0.31299132	1.5961143	0.05222437	0.615302	1.0	1689	tags=56%, list=24%, signal=73%
POSITIVE_REGULATION_OF_HYDROLASE_ACTIVITY	POSITIVE_REGULATION_OF_HYDROLASE_ACTIVITY		23	0.27391747	1.5914129	0.042168673	0.61812866	1.0	2330	tags=61%, list=34%, signal=91%
RNA_METABOLIC_PROCESS	RNA_METABOLIC_PROCESS		412	0.06754649	1.5907305	0.04901961	0.60946864	1.0	1732	tags=31%, list=25%, signal=39%
SECRETION_BY_CELL	SECRETION_BY_CELL		46	0.19783303	1.5874441	0.048262548	0.6077291	1.0	3314	tags=67%, list=48%, signal=128%
HSA04810_REGULATION_OF_ACTIN_CYTOSKELETON	HSA04810_REGULATION_OF_ACTIN_CYTOSKELETON		89	0.1428794	1.5823755	0.037623763	0.6117287	1.0	4013	tags=72%, list=58%, signal=168%
UVC_TTD_4HR_UP	UVC_TTD_4HR_UP		16	0.32722285	1.5790986	0.053254437	0.6112493	1.0	3374	tags=81%, list=49%, signal=158%
LIZUKA_G1_SM_G2	LIZUKA_G1_SM_G2		18	0.30575612	1.5752904	0.044176705	0.61224777	1.0	3668	tags=83%, list=53%, signal=176%
BREAST_CANCER_ESTROGEN_SIGNALING	BREAST_CANCER_ESTROGEN_SIGNALING		44	0.20147566	1.568936	0.06349207	0.6201931	1.0	3659	tags=73%, list=53%, signal=153%
SOLUBLE_FRACTION	SOLUBLE_FRACTION		55	0.17802556	1.5688083	0.055445544	0.6106871	1.0	3444	tags=67%, list=50%, signal=132%
CALRES_MOUSE_DN	CALRES_MOUSE_DN		16	0.32505774	1.5540292	0.06412826	0.6446312	1.0	2955	tags=75%, list=43%, signal=130%
REGULATION_OF_TRANSCRIPTION	REGULATION_OF_TRANSCRIPTION		313	0.07869512	1.5536317	0.06584362	0.6355659	1.0	1851	tags=34%, list=27%, signal=45%
SECRETORY_PATHWAY	SECRETORY_PATHWAY		37	0.21913141	1.5508524	0.06563707	0.6335344	1.0	2802	tags=62%, list=40%, signal=104%
REGULATION_OF_TRANSCRIPTION__DNA_DEPENDENT	REGULATION_OF_TRANSCRIPTION__DNA_DEPENDENT		256	0.081564	1.5502672	0.05858586	0.62591344	1.0	1732	tags=33%, list=25%, signal=42%
APOPTOSIS_KEGG	APOPTOSIS_KEGG		21	0.28330687	1.54207	0.064453125	0.639853	1.0	3659	tags=81%, list=53%, signal=171%
REGULATION_OF_BODY_FLUID_LEVELS	REGULATION_OF_BODY_FLUID_LEVELS		21	0.27430305	1.5386333	0.06286837	0.6396923	1.0	4052	tags=86%, list=58%, signal=205%
HCC_SURVIVAL_GOOD_VS_POOR_DN	HCC_SURVIVAL_GOOD_VS_POOR_DN		57	0.17499025	1.5333197	0.060542796	0.645519	1.0	3545	tags=68%, list=51%, signal=139%
TRANSCRIPTION	TRANSCRIPTION		389	0.06965935	1.5256975	0.06584362	0.6583285	1.0	1863	tags=33%, list=27%, signal=43%
HSA04520_ADHERENS_JUNCTION	HSA04520_ADHERENS_JUNCTION		50	0.17719176	1.5178839	0.06361829	0.67288584	1.0	3916	tags=74%, list=56%, signal=168%
OXSTRESS_RPETWO_DN	OXSTRESS_RPETWO_DN		40	0.20657593	1.5135782	0.07337526	0.67633164	1.0	4128	tags=80%, list=59%, signal=196%
HSA01030_GLYCAN_STRUCTURES_BIOSYNTHESIS_1	HSA01030_GLYCAN_STRUCTURES_BIOSYNTHESIS_1		48	0.18247296	1.5116705	0.06916996	0.6724335	1.0	2068	tags=48%, list=30%, signal=68%
TRANSCRIPTION_FACTOR_ACTIVITY	TRANSCRIPTION_FACTOR_ACTIVITY		176	0.09993555	1.5105325	0.059880238	0.66665316	1.0	3781	tags=64%, list=54%, signal=137%
PEPTIDASE_ACTIVITY	PEPTIDASE_ACTIVITY		53	0.17455637	1.5053107	0.093023255	0.67276734	1.0	4823	tags=87%, list=69%, signal=282%
INTEGRIN_MEDIATED_CELL_ADHESION_KEGG	INTEGRIN_MEDIATED_CELL_ADHESION_KEGG		40	0.2056779	1.5052599	0.06822612	0.66410464	1.0	3787	tags=75%, list=55%, signal=164%
REGULATION_OF_GENE_EXPRESSION	REGULATION_OF_GENE_EXPRESSION		352	0.07127097	1.503876	0.056640625	0.65934163	1.0	1857	tags=34%, list=27%, signal=43%
ACTIVE_TRANSMEMBRANE_TRANSPORTER_ACTIVITY	ACTIVE_TRANSMEMBRANE_TRANSPORTER_ACTIVITY		53	0.17396769	1.5026894	0.06884058	0.65446097	1.0	4434	tags=81%, list=64%, signal=223%
ORGAN_MORPHOGENESIS	ORGAN_MORPHOGENESIS		61	0.1609453	1.4974942	0.09486166	0.6614138	1.0	3900	tags=72%, list=56%, signal=163%
HYPOXIA_RCC_UP	HYPOXIA_RCC_UP		41	0.19336236	1.4898717	0.075247526	0.67565	1.0	2729	tags=59%, list=39%, signal=96%
RNA_BIOSYNTHETIC_PROCESS	RNA_BIOSYNTHETIC_PROCESS		331	0.07245591	1.4892428	0.06938776	0.6688394	1.0	3338	tags=55%, list=48%, signal=101%
UVB_SCC_DN	UVB_SCC_DN		69	0.15611912	1.4876921	0.08113591	0.66508067	1.0	2448	tags=51%, list=35%, signal=78%
UVC_HIGH_D2_DN	UVC_HIGH_D2_DN		25	0.24427229	1.4867067	0.0754717	0.6601615	1.0	1642	tags=48%, list=24%, signal=63%
HSA00790_FOLATE_BIOSYNTHESIS	HSA00790_FOLATE_BIOSYNTHESIS		17	0.2963765	1.4831055	0.08179959	0.6623332	1.0	4890	tags=100%, list=70%, signal=337%
RUFFLE	RUFFLE		16	0.30889145	1.4813573	0.083333336	0.6598937	1.0	3067	tags=75%, list=44%, signal=134%
UVC_HIGH_ALL_DN	UVC_HIGH_ALL_DN		185	0.0964192	1.4793674	0.06652807	0.65777665	1.0	2763	tags=49%, list=40%, signal=80%
TRANSCRIPTION__DNA_DEPENDENT	TRANSCRIPTION__DNA_DEPENDENT		331	0.07245591	1.4791738	0.08266129	0.65074897	1.0	3338	tags=55%, list=48%, signal=101%
AMINE_TRANSMEMBRANE_TRANSPORTER_ACTIVITY	AMINE_TRANSMEMBRANE_TRANSPORTER_ACTIVITY		18	0.2931466	1.4787008	0.077380955	0.6445589	1.0	2598	tags=67%, list=37%, signal=106%
MUNSHI_MM_UP	MUNSHI_MM_UP		20	0.27172157	1.4765798	0.06352459	0.6432004	1.0	2284	tags=60%, list=33%, signal=89%
CTNNB1_ONCOGENIC_SIGNATURE	CTNNB1_ONCOGENIC_SIGNATURE		55	0.17260717	1.474758	0.06876228	0.64065576	1.0	1335	tags=36%, list=19%, signal=45%
TGFBETA_LATE_UP	TGFBETA_LATE_UP		18	0.28992206	1.4734857	0.08812261	0.6372902	1.0	4935	tags=100%, list=71%, signal=345%
AGUIRRE_PANCREAS_CHR17	AGUIRRE_PANCREAS_CHR17		21	0.2680919	1.4729924	0.06626506	0.6315646	1.0	4095	tags=86%, list=59%, signal=208%
ICHIBA_GVHD	ICHIBA_GVHD		77	0.1416392	1.4705684	0.06910569	0.6317228	1.0	3806	tags=69%, list=55%, signal=151%
NUCLEAR_CHROMOSOME	NUCLEAR_CHROMOSOME		19	0.27801636	1.4664395	0.08282828	0.6361109	1.0	1363	tags=47%, list=20%, signal=59%
POD1_KO_UP	POD1_KO_UP		138	0.10890437	1.4649001	0.082474224	0.633702	1.0	4340	tags=73%, list=63%, signal=191%
CHIARETTI_ZAP70_DIFF	CHIARETTI_ZAP70_DIFF		24	0.24441238	1.4632581	0.08630394	0.6313759	1.0	4673	tags=92%, list=67%, signal=279%
HSA05222_SMALL_CELL_LUNG_CANCER	HSA05222_SMALL_CELL_LUNG_CANCER		47	0.18005054	1.4612637	0.07171315	0.6302761	1.0	4076	tags=77%, list=59%, signal=184%
BRCA2_BRCA1_DN	BRCA2_BRCA1_DN		15	0.31448504	1.4525971	0.09917355	0.64837337	1.0	4301	tags=93%, list=62%, signal=245%
CELL_CORTEX	CELL_CORTEX		18	0.28793278	1.4518555	0.085877866	0.64392895	1.0	4563	tags=94%, list=66%, signal=275%
HSA00562_INOSITOL_PHOSPHATE_METABOLISM	HSA00562_INOSITOL_PHOSPHATE_METABOLISM		17	0.28983772	1.4504834	0.077689245	0.6415401	1.0	2076	tags=59%, list=30%, signal=84%
ZHAN_TONSIL_BONEMARROW	ZHAN_TONSIL_BONEMARROW		18	0.2843232	1.449502	0.087286524	0.63801837	1.0	1116	tags=44%, list=16%, signal=53%
ANATOMICAL_STRUCTURE_MORPHOGENESIS	ANATOMICAL_STRUCTURE_MORPHOGENESIS		157	0.098484494	1.4438747	0.10147992	0.64678186	1.0	5390	tags=87%, list=78%, signal=381%
HSA04115_P53_SIGNALING_PATHWAY	HSA04115_P53_SIGNALING_PATHWAY		32	0.21412037	1.4420484	0.10982659	0.64567107	1.0	2425	tags=56%, list=35%, signal=86%
SHEPARD_CRASH_AND_BURN_MUT_VS_WT_UP	SHEPARD_CRASH_AND_BURN_MUT_VS_WT_UP		43	0.17882816	1.4405162	0.08898305	0.6438793	1.0	4417	tags=81%, list=64%, signal=222%
FALT_BCLL_IG_MUTATED_VS_WT_UP	FALT_BCLL_IG_MUTATED_VS_WT_UP		27	0.2336755	1.4336958	0.0831643	0.6556983	1.0	3012	tags=67%, list=43%, signal=117%
UVC_TTD_ALL_UP	UVC_TTD_ALL_UP		25	0.24178061	1.4336159	0.10251046	0.64972496	1.0	1937	tags=52%, list=28%, signal=72%
PENG_LEUCINE_UP	PENG_LEUCINE_UP		30	0.22345968	1.4320002	0.09090909	0.6482195	1.0	1926	tags=50%, list=28%, signal=69%
ZHAN_MM_CD138_MF_VS_REST	ZHAN_MM_CD138_MF_VS_REST		21	0.26043624	1.4317023	0.09417041	0.6430449	1.0	3156	tags=71%, list=45%, signal=131%
REGULATION_OF_TRANSCRIPTION_FROM_RNA_POLYMERASE_II_PROMOTER	REGULATION_OF_TRANSCRIPTION_FROM_RNA_POLYMERASE_II_PROMOTER		164	0.0964134	1.4299722	0.08793456	0.64169675	1.0	2902	tags=51%, list=42%, signal=86%
ELONGINA_KO_DN	ELONGINA_KO_DN		78	0.13871023	1.4256158	0.086065575	0.64781004	1.0	3854	tags=69%, list=56%, signal=154%
UVC_HIGH_D3_DN	UVC_HIGH_D3_DN		29	0.22358191	1.4228101	0.125	0.64971906	1.0	2763	tags=62%, list=40%, signal=103%
SECRETION	SECRETION		66	0.14960308	1.4202477	0.09823183	0.65092385	1.0	3915	tags=71%, list=56%, signal=162%
HOFMANN_MDS_CD34_LOW_AND_HIGH_RISK	HOFMANN_MDS_CD34_LOW_AND_HIGH_RISK		21	0.25769177	1.4126594	0.09248555	0.66672134	1.0	4167	tags=86%, list=60%, signal=214%
KINASE_ACTIVITY	KINASE_ACTIVITY		160	0.09678656	1.4125746	0.09072581	0.6610903	1.0	2120	tags=40%, list=31%, signal=56%
CMV_HCMV_TIMECOURSE_20HRS_UP	CMV_HCMV_TIMECOURSE_20HRS_UP		39	0.1861156	1.4087932	0.10331384	0.66634595	1.0	2631	tags=56%, list=38%, signal=90%
HSA04130_SNARE_INTERACTIONS_IN_VESICULAR_TRANSPORT	HSA04130_SNARE_INTERACTIONS_IN_VESICULAR_TRANSPORT		16	0.28449768	1.4073604	0.11220472	0.66468585	1.0	2802	tags=69%, list=40%, signal=115%
TRANSMEMBRANE_RECEPTOR_PROTEIN_SERINE_THREONINE_KINASE_SIGNALING_PATHWAY	TRANSMEMBRANE_RECEPTOR_PROTEIN_SERINE_THREONINE_KINASE_SIGNALING_PATHWAY		27	0.22978814	1.4045472	0.11042945	0.6661949	1.0	4582	tags=89%, list=66%, signal=260%
CELLULAR_COMPONENT_ASSEMBLY	CELLULAR_COMPONENT_ASSEMBLY		140	0.1027925	1.4026122	0.1183432	0.6658027	1.0	4706	tags=78%, list=68%, signal=237%
CHANG_SERUM_RESPONSE_DN	CHANG_SERUM_RESPONSE_DN		62	0.15111886	1.4018131	0.095032394	0.66216695	1.0	1199	tags=32%, list=17%, signal=39%
MACROMOLECULAR_COMPLEX_ASSEMBLY	MACROMOLECULAR_COMPLEX_ASSEMBLY		135	0.10190757	1.4009221	0.09270217	0.6589106	1.0	4706	tags=78%, list=68%, signal=237%
REGULATION_OF_RNA_METABOLIC_PROCESS	REGULATION_OF_RNA_METABOLIC_PROCESS		260	0.07636838	1.399235	0.10229645	0.6578915	1.0	1732	tags=32%, list=25%, signal=41%
BYSTRYKH_HSC_BRAIN_CIS_GLOCUS	BYSTRYKH_HSC_BRAIN_CIS_GLOCUS		21	0.2507102	1.3986454	0.12623274	0.65405494	1.0	3554	tags=76%, list=51%, signal=156%
HSA05210_COLORECTAL_CANCER	HSA05210_COLORECTAL_CANCER		49	0.17327252	1.3976246	0.103174604	0.6514569	1.0	3906	tags=73%, list=56%, signal=167%
CELL_MOTILITY	CELL_MOTILITY		41	0.18426768	1.3965964	0.114503816	0.6492002	1.0	5671	tags=100%, list=82%, signal=542%
HSA04010_MAPK_SIGNALING_PATHWAY	HSA04010_MAPK_SIGNALING_PATHWAY		109	0.11554393	1.3932343	0.13179916	0.65293604	1.0	3605	tags=63%, list=52%, signal=130%
HOFMANN_MDS_CD34_HIGH_RISK	HOFMANN_MDS_CD34_HIGH_RISK		15	0.29326984	1.3903309	0.11382114	0.65562207	1.0	4448	tags=93%, list=64%, signal=259%
SCHUMACHER_MYC_UP	SCHUMACHER_MYC_UP		26	0.22564328	1.3864213	0.13069306	0.6611667	1.0	1910	tags=50%, list=28%, signal=69%
ACTIN_FILAMENT_BASED_PROCESS	ACTIN_FILAMENT_BASED_PROCESS		50	0.16334204	1.3793546	0.10748561	0.67536515	1.0	4567	tags=82%, list=66%, signal=238%
REOVIRUS_HEK293_DN	REOVIRUS_HEK293_DN		88	0.12598124	1.3773617	0.107368425	0.67548907	1.0	4580	tags=78%, list=66%, signal=227%
SMITH_HTERT_UP	SMITH_HTERT_UP		40	0.18473352	1.3745004	0.13052209	0.67805654	1.0	4626	tags=85%, list=67%, signal=253%
PHOSPHORIC_MONOESTER_HYDROLASE_ACTIVITY	PHOSPHORIC_MONOESTER_HYDROLASE_ACTIVITY		54	0.15698545	1.3711287	0.11222445	0.68190116	1.0	1875	tags=43%, list=27%, signal=58%
ENERGY_DERIVATION_BY_OXIDATION_OF_ORGANIC_COMPOUNDS	ENERGY_DERIVATION_BY_OXIDATION_OF_ORGANIC_COMPOUNDS		15	0.29544428	1.3704686	0.123173274	0.678472	1.0	3970	tags=87%, list=57%, signal=202%
CARBOXYLIC_ACID_TRANSMEMBRANE_TRANSPORTER_ACTIVITY	CARBOXYLIC_ACID_TRANSMEMBRANE_TRANSPORTER_ACTIVITY		20	0.24803585	1.3689306	0.1208577	0.6776297	1.0	4184	tags=85%, list=60%, signal=213%
HSA05223_NON_SMALL_CELL_LUNG_CANCER	HSA05223_NON_SMALL_CELL_LUNG_CANCER		29	0.21273592	1.3680643	0.13147411	0.67502534	1.0	2838	tags=62%, list=41%, signal=105%
ACTIN_CYTOSKELETON	ACTIN_CYTOSKELETON		59	0.14962275	1.3588946	0.13737373	0.6961619	1.0	2382	tags=49%, list=34%, signal=74%
GAMETE_GENERATION	GAMETE_GENERATION		39	0.18165581	1.355183	0.11198428	0.7010644	1.0	3374	tags=67%, list=49%, signal=129%
ENZYME_INHIBITOR_ACTIVITY	ENZYME_INHIBITOR_ACTIVITY		46	0.1683664	1.3535435	0.12448133	0.7003376	1.0	4423	tags=80%, list=64%, signal=220%
BRUNO_IL3_DN	BRUNO_IL3_DN		29	0.21228214	1.345388	0.13717695	0.71739686	1.0	1165	tags=38%, list=17%, signal=45%
MAGNESIUM_ION_BINDING	MAGNESIUM_ION_BINDING		28	0.21269521	1.3450917	0.1199187	0.7129856	1.0	1752	tags=46%, list=25%, signal=62%
HSA05219_BLADDER_CANCER	HSA05219_BLADDER_CANCER		19	0.25834697	1.3426739	0.13412228	0.7149214	1.0	4423	tags=89%, list=64%, signal=246%
MYC_ONCOGENIC_SIGNATURE	MYC_ONCOGENIC_SIGNATURE		60	0.1480051	1.3407714	0.12727273	0.7150256	1.0	5114	tags=88%, list=74%, signal=332%
COCAINE_BRAIN_4WKS_UP	COCAINE_BRAIN_4WKS_UP		27	0.21808857	1.338193	0.12989691	0.71745956	1.0	3377	tags=70%, list=49%, signal=136%
LYTIC_VACUOLE	LYTIC_VACUOLE		25	0.2235063	1.3370359	0.14035088	0.7157445	1.0	3730	tags=76%, list=54%, signal=164%
ORGANIC_ACID_TRANSMEMBRANE_TRANSPORTER_ACTIVITY	ORGANIC_ACID_TRANSMEMBRANE_TRANSPORTER_ACTIVITY		20	0.24803585	1.3359131	0.13562752	0.71394867	1.0	4184	tags=85%, list=60%, signal=213%
HSA02010_ABC_TRANSPORTERS_GENERAL	HSA02010_ABC_TRANSPORTERS_GENERAL		23	0.23165166	1.3316905	0.14176245	0.7205425	1.0	4434	tags=87%, list=64%, signal=240%
CHIARETTI_T_ALL_DIFF	CHIARETTI_T_ALL_DIFF		132	0.09834251	1.3298622	0.14541833	0.7206804	1.0	2012	tags=39%, list=29%, signal=53%
PROTEIN_KINASE_CASCADE	PROTEIN_KINASE_CASCADE		127	0.09962125	1.3291025	0.13487476	0.71782595	1.0	1671	tags=34%, list=24%, signal=44%
TENEDINI_MEGAKARYOCYTIC_GENES	TENEDINI_MEGAKARYOCYTIC_GENES		27	0.21450105	1.3279296	0.14570858	0.7162947	1.0	3659	tags=74%, list=53%, signal=156%
G_PROTEIN_SIGNALING	G_PROTEIN_SIGNALING		52	0.15382385	1.3275659	0.15748031	0.7126137	1.0	2945	tags=58%, list=42%, signal=99%
FETAL_LIVER_ENRICHED_TRANSCRIPTION_FACTORS	FETAL_LIVER_ENRICHED_TRANSCRIPTION_FACTORS		37	0.18133192	1.3252745	0.13372093	0.7139009	1.0	1374	tags=38%, list=20%, signal=47%
HDACI_COLON_BUT24HRS_DN	HDACI_COLON_BUT24HRS_DN		56	0.15214868	1.3250523	0.1411043	0.7097085	1.0	1059	tags=30%, list=15%, signal=36%
TRANSCRIPTION_COREPRESSOR_ACTIVITY	TRANSCRIPTION_COREPRESSOR_ACTIVITY		45	0.1650191	1.3216062	0.14933838	0.7143182	1.0	2564	tags=53%, list=37%, signal=84%
CMV_24HRS_DN	CMV_24HRS_DN		39	0.1788039	1.3211644	0.1490566	0.71100444	1.0	4462	tags=82%, list=64%, signal=228%
CALCIUM_REGULATION_IN_CARDIAC_CELLS	CALCIUM_REGULATION_IN_CARDIAC_CELLS		65	0.14201304	1.3201773	0.14020619	0.7091368	1.0	2868	tags=55%, list=41%, signal=93%
CELL_FRACTION	CELL_FRACTION		183	0.085733555	1.3197403	0.14314516	0.7056513	1.0	3138	tags=54%, list=45%, signal=95%
DNA_DIRECTED_RNA_POLYMERASE_II__HOLOENZYME	DNA_DIRECTED_RNA_POLYMERASE_II__HOLOENZYME		28	0.20864664	1.316101	0.15102041	0.71079814	1.0	3268	tags=68%, list=47%, signal=128%
AS3_FIBRO_UP	AS3_FIBRO_UP		16	0.26977482	1.3151217	0.1391129	0.7087238	1.0	4206	tags=88%, list=61%, signal=221%
CALRES_RHESUS_DN	CALRES_RHESUS_DN		18	0.26212022	1.3149117	0.16306484	0.7050162	1.0	4356	tags=89%, list=63%, signal=238%
GAMMA_ESR_WS_UNREG	GAMMA_ESR_WS_UNREG		15	0.27655748	1.3125918	0.16194332	0.7068371	1.0	3175	tags=73%, list=46%, signal=135%
LYSOSOME	LYSOSOME		25	0.2235063	1.3124323	0.1670103	0.70278394	1.0	3730	tags=76%, list=54%, signal=164%
OLDONLY_FIBRO_UP	OLDONLY_FIBRO_UP		16	0.26919746	1.3105471	0.16766468	0.7034578	1.0	2040	tags=56%, list=29%, signal=79%
COATED_VESICLE	COATED_VESICLE		20	0.24280766	1.3093166	0.15560167	0.70260966	1.0	3873	tags=80%, list=56%, signal=180%
PHOSPHOLIPID_BINDING	PHOSPHOLIPID_BINDING		21	0.2378545	1.306616	0.14760914	0.7055619	1.0	1659	tags=48%, list=24%, signal=62%
DFOSB_BRAIN_8WKS_UP	DFOSB_BRAIN_8WKS_UP		25	0.21758637	1.3066002	0.16508539	0.70132256	1.0	4882	tags=92%, list=70%, signal=309%
BCNU_GLIOMA_MGMT_48HRS_DN	BCNU_GLIOMA_MGMT_48HRS_DN		39	0.17530589	1.3058726	0.15106383	0.6991434	1.0	3952	tags=74%, list=57%, signal=172%
HSA05213_ENDOMETRIAL_CANCER	HSA05213_ENDOMETRIAL_CANCER		30	0.20490795	1.3052135	0.1552063	0.69647986	1.0	3906	tags=77%, list=56%, signal=174%
ENDOPEPTIDASE_ACTIVITY	ENDOPEPTIDASE_ACTIVITY		32	0.19560185	1.3030235	0.15968063	0.6982215	1.0	5157	tags=94%, list=74%, signal=363%
AS3_FIBRO_C3	AS3_FIBRO_C3		16	0.26977482	1.3020797	0.15841584	0.6966424	1.0	4206	tags=88%, list=61%, signal=221%
ZHAN_MMPC_LATEVS	ZHAN_MMPC_LATEVS		21	0.2413212	1.299334	0.14712153	0.69985545	1.0	1635	tags=48%, list=24%, signal=62%
FLECHNER_KIDNEY_TRANSPLANT_REJECTION_PBL_DN	FLECHNER_KIDNEY_TRANSPLANT_REJECTION_PBL_DN		21	0.23284703	1.2986495	0.16170213	0.69754577	1.0	2355	tags=57%, list=34%, signal=86%
FATTY_ACID_METABOLIC_PROCESS	FATTY_ACID_METABOLIC_PROCESS		25	0.21323891	1.2984835	0.14256619	0.6939532	1.0	2690	tags=60%, list=39%, signal=98%
SECONDARY_ACTIVE_TRANSMEMBRANE_TRANSPORTER_ACTIVITY	SECONDARY_ACTIVE_TRANSMEMBRANE_TRANSPORTER_ACTIVITY		20	0.24636051	1.2970382	0.15132925	0.6934659	1.0	3154	tags=70%, list=45%, signal=128%
HSA04930_TYPE_II_DIABETES_MELLITUS	HSA04930_TYPE_II_DIABETES_MELLITUS		24	0.22524087	1.2958379	0.17479675	0.69246703	1.0	1623	tags=46%, list=23%, signal=60%
GH_EXOGENOUS_MIDDLE_UP	GH_EXOGENOUS_MIDDLE_UP		29	0.20465751	1.293666	0.15821502	0.69412774	1.0	4570	tags=86%, list=66%, signal=251%
PROTEIN_KINASE_REGULATOR_ACTIVITY	PROTEIN_KINASE_REGULATOR_ACTIVITY		26	0.20895328	1.2911459	0.16232465	0.6965841	1.0	3895	tags=77%, list=56%, signal=175%
WERNER_FIBRO_DN	WERNER_FIBRO_DN		72	0.12909067	1.2903807	0.16236162	0.6945254	1.0	2391	tags=47%, list=34%, signal=71%
RADMACHER_AMLNORMALKARYTYPE_SIG	RADMACHER_AMLNORMALKARYTYPE_SIG		35	0.18445505	1.2901108	0.15809524	0.69138485	1.0	1899	tags=46%, list=27%, signal=63%
KLEIN_PEL_UP	KLEIN_PEL_UP		17	0.26404777	1.2882303	0.17088607	0.6923675	1.0	4297	tags=88%, list=62%, signal=231%
MAPKKK_CASCADE_GO_0000165	MAPKKK_CASCADE_GO_0000165		37	0.18072149	1.286691	0.15873016	0.69246286	1.0	3818	tags=73%, list=55%, signal=161%
SIG_PIP3_SIGNALING_IN_CARDIAC_MYOCTES	SIG_PIP3_SIGNALING_IN_CARDIAC_MYOCTES		36	0.18080486	1.2865702	0.16370809	0.68900836	1.0	2222	tags=50%, list=32%, signal=73%
TRANSFERASE_ACTIVITY__TRANSFERRING_PHOSPHORUS_CONTAINING_GROUPS	TRANSFERASE_ACTIVITY__TRANSFERRING_PHOSPHORUS_CONTAINING_GROUPS		178	0.084359355	1.2842082	0.1627907	0.69137794	1.0	2120	tags=39%, list=31%, signal=54%
DNMT1_KO_UP	DNMT1_KO_UP		37	0.17961021	1.2825441	0.17213115	0.69190985	1.0	3638	tags=70%, list=52%, signal=147%
PHOSPHOPROTEIN_PHOSPHATASE_ACTIVITY	PHOSPHOPROTEIN_PHOSPHATASE_ACTIVITY		41	0.17118043	1.2804152	0.18181819	0.69398826	1.0	511	tags=24%, list=7%, signal=26%
NITROGEN_COMPOUND_METABOLIC_PROCESS	NITROGEN_COMPOUND_METABOLIC_PROCESS		49	0.15599294	1.280299	0.17357002	0.69053406	1.0	1616	tags=39%, list=23%, signal=50%
MONOCARBOXYLIC_ACID_METABOLIC_PROCESS	MONOCARBOXYLIC_ACID_METABOLIC_PROCESS		33	0.18912756	1.2785282	0.17153996	0.69124943	1.0	2690	tags=58%, list=39%, signal=94%
SULFUR_METABOLIC_PROCESS	SULFUR_METABOLIC_PROCESS		15	0.27096745	1.2774415	0.2	0.6903464	1.0	1362	tags=47%, list=20%, signal=58%
HDACI_COLON_TSA2HRS_UP	HDACI_COLON_TSA2HRS_UP		31	0.19340369	1.276733	0.1734694	0.6884199	1.0	5158	tags=94%, list=74%, signal=362%
IFN_BETA_GLIOMA_UP	IFN_BETA_GLIOMA_UP		24	0.21343932	1.2732036	0.19535783	0.6940297	1.0	1126	tags=38%, list=16%, signal=45%
WERNERONLY_FIBRO_DN	WERNERONLY_FIBRO_DN		25	0.21673653	1.2724954	0.1812977	0.6921466	1.0	1277	tags=40%, list=18%, signal=49%
CMV_HCMV_TIMECOURSE_14HRS_UP	CMV_HCMV_TIMECOURSE_14HRS_UP		29	0.19671875	1.2724515	0.1959596	0.6886286	1.0	4146	tags=79%, list=60%, signal=196%
AT1RPATHWAY	AT1RPATHWAY		19	0.24153526	1.2723932	0.1734694	0.68517315	1.0	3443	tags=74%, list=50%, signal=146%
PGC	PGC		101	0.1087387	1.2712259	0.16890594	0.68446016	1.0	2005	tags=40%, list=29%, signal=55%
OXSTRESS_RPE_H2O2HNE_DN	OXSTRESS_RPE_H2O2HNE_DN		15	0.27264157	1.2710834	0.1788793	0.68131554	1.0	4128	tags=87%, list=59%, signal=213%
ST_JNK_MAPK_PATHWAY	ST_JNK_MAPK_PATHWAY		17	0.2520232	1.2670349	0.17204301	0.6874404	1.0	1521	tags=47%, list=22%, signal=60%
POSITIVE_REGULATION_OF_TRANSCRIPTION_FROM_RNA_POLYMERASE_II_PROMOTER	POSITIVE_REGULATION_OF_TRANSCRIPTION_FROM_RNA_POLYMERASE_II_PROMOTER		38	0.17761824	1.2658551	0.18661258	0.686637	1.0	3889	tags=74%, list=56%, signal=167%
PYK2PATHWAY	PYK2PATHWAY		16	0.26053697	1.2652265	0.1879845	0.68468904	1.0	3402	tags=75%, list=49%, signal=147%
HSA00190_OXIDATIVE_PHOSPHORYLATION	HSA00190_OXIDATIVE_PHOSPHORYLATION		20	0.2371462	1.2615937	0.17575757	0.69047374	1.0	5301	tags=100%, list=76%, signal=421%
HSA05211_RENAL_CELL_CARCINOMA	HSA05211_RENAL_CELL_CARCINOMA		38	0.17370859	1.2614	0.21442886	0.6874574	1.0	3916	tags=74%, list=56%, signal=168%
PROTEIN_KINASE_BINDING	PROTEIN_KINASE_BINDING		32	0.1861979	1.258798	0.19805825	0.69042826	1.0	3269	tags=66%, list=47%, signal=123%
ST_DIFFERENTIATION_PATHWAY_IN_PC12_CELLS	ST_DIFFERENTIATION_PATHWAY_IN_PC12_CELLS		20	0.23148471	1.2579014	0.19427402	0.6891707	1.0	1521	tags=45%, list=22%, signal=57%
PROTEIN_KINASE_INHIBITOR_ACTIVITY	PROTEIN_KINASE_INHIBITOR_ACTIVITY		17	0.2568381	1.2578877	0.20083682	0.68578815	1.0	3530	tags=76%, list=51%, signal=155%
HSA04370_VEGF_SIGNALING_PATHWAY	HSA04370_VEGF_SIGNALING_PATHWAY		29	0.19679855	1.2546304	0.2060606	0.6906097	1.0	3906	tags=76%, list=56%, signal=173%
TRANSCRIPTION_FACTOR_BINDING	TRANSCRIPTION_FACTOR_BINDING		144	0.08982027	1.2546145	0.18982388	0.6872482	1.0	1944	tags=37%, list=28%, signal=50%
CMV_IE86_UP	CMV_IE86_UP		16	0.26674366	1.2542664	0.18163672	0.68475884	1.0	4661	tags=94%, list=67%, signal=284%
REGULATION_OF_METABOLIC_PROCESS	REGULATION_OF_METABOLIC_PROCESS		402	0.05482522	1.2534618	0.18253969	0.6834725	1.0	1955	tags=33%, list=28%, signal=44%
PROTEIN_IMPORT_INTO_NUCLEUS	PROTEIN_IMPORT_INTO_NUCLEUS		22	0.22128393	1.2534324	0.20158103	0.6802296	1.0	1308	tags=41%, list=19%, signal=50%
REGULATION_OF_MOLECULAR_FUNCTION	REGULATION_OF_MOLECULAR_FUNCTION		134	0.090588875	1.2493366	0.2016129	0.68707633	1.0	4616	tags=75%, list=66%, signal=220%
KENNY_WNT_UP	KENNY_WNT_UP		22	0.21818446	1.2471082	0.18908381	0.6895899	1.0	2592	tags=59%, list=37%, signal=94%
GOLGI_MEMBRANE	GOLGI_MEMBRANE		22	0.22442281	1.2425132	0.19096509	0.6979618	1.0	4127	tags=82%, list=59%, signal=201%
JAIN_NEMO_DIFF	JAIN_NEMO_DIFF		38	0.17150608	1.2413377	0.22179732	0.6974238	1.0	3383	tags=66%, list=49%, signal=128%
NUCLEAR_IMPORT	NUCLEAR_IMPORT		22	0.22128393	1.2394403	0.19277108	0.69929516	1.0	1308	tags=41%, list=19%, signal=50%
IDX_TSA_UP_CLUSTER2	IDX_TSA_UP_CLUSTER2		27	0.19903192	1.2393641	0.19076306	0.69624704	1.0	3766	tags=74%, list=54%, signal=161%
UNFOLDED_PROTEIN_BINDING	UNFOLDED_PROTEIN_BINDING		17	0.2500361	1.2367454	0.21991701	0.69948304	1.0	5211	tags=100%, list=75%, signal=400%
LEE_TCELLS4_UP	LEE_TCELLS4_UP		19	0.24125405	1.2362934	0.21387284	0.6972921	1.0	2714	tags=63%, list=39%, signal=103%
KLEIN_PEL_DN	KLEIN_PEL_DN		27	0.20318165	1.2359807	0.21584159	0.6947615	1.0	1937	tags=48%, list=28%, signal=67%
RESPONSE_TO_EXTERNAL_STIMULUS	RESPONSE_TO_EXTERNAL_STIMULUS		115	0.09982488	1.2336966	0.18627451	0.6972138	1.0	5899	tags=95%, list=85%, signal=619%
REGULATION_OF_TRANSFERASE_ACTIVITY	REGULATION_OF_TRANSFERASE_ACTIVITY		66	0.12812486	1.2329861	0.2046332	0.6959334	1.0	4694	tags=80%, list=68%, signal=245%
P38MAPKPATHWAY	P38MAPKPATHWAY		21	0.22750254	1.2313298	0.2194617	0.6969162	1.0	4376	tags=86%, list=63%, signal=231%
DEATHPATHWAY	DEATHPATHWAY		15	0.2631645	1.2308875	0.21593292	0.6947238	1.0	1879	tags=53%, list=27%, signal=73%
HSA04110_CELL_CYCLE	HSA04110_CELL_CYCLE		55	0.13883528	1.2301217	0.20502092	0.693316	1.0	4219	tags=75%, list=61%, signal=188%
CYTOSKELETON_ORGANIZATION_AND_BIOGENESIS	CYTOSKELETON_ORGANIZATION_AND_BIOGENESIS		86	0.11098224	1.2292057	0.19624217	0.6924093	1.0	4567	tags=77%, list=66%, signal=221%
TRANSFORMING_GROWTH_FACTOR_BETA_RECEPTOR_SIGNALING_PATHWAY	TRANSFORMING_GROWTH_FACTOR_BETA_RECEPTOR_SIGNALING_PATHWAY		18	0.242083	1.228609	0.2192623	0.69081956	1.0	4109	tags=83%, list=59%, signal=204%
PHOSPHOTRANSFERASE_ACTIVITY__ALCOHOL_GROUP_AS_ACCEPTOR	PHOSPHOTRANSFERASE_ACTIVITY__ALCOHOL_GROUP_AS_ACCEPTOR		151	0.08718071	1.2281424	0.2	0.6887669	1.0	2120	tags=39%, list=31%, signal=55%
CHAUHAN_2ME2	CHAUHAN_2ME2		15	0.26326072	1.2276698	0.20958084	0.68686306	1.0	4193	tags=87%, list=60%, signal=218%
ACTIN_CYTOSKELETON_ORGANIZATION_AND_BIOGENESIS	ACTIN_CYTOSKELETON_ORGANIZATION_AND_BIOGENESIS		47	0.15170334	1.2266551	0.2081712	0.6862427	1.0	4567	tags=81%, list=66%, signal=235%
SERUM_FIBROBLAST_CORE_DN	SERUM_FIBROBLAST_CORE_DN		97	0.1070346	1.2255771	0.21135029	0.6857023	1.0	1199	tags=28%, list=17%, signal=33%
PEART_HISTONE_UP	PEART_HISTONE_UP		23	0.21261697	1.2230778	0.20127119	0.6888551	1.0	3660	tags=74%, list=53%, signal=156%
CMV-UV_HCMV_6HRS_DN	CMV-UV_HCMV_6HRS_DN		62	0.13063063	1.2229378	0.20436507	0.6861704	1.0	3132	tags=58%, list=45%, signal=105%
ZHAN_MMPC_SIMAL	ZHAN_MMPC_SIMAL		19	0.23005131	1.21749	0.20736434	0.6967653	1.0	3888	tags=79%, list=56%, signal=179%
AMINE_METABOLIC_PROCESS	AMINE_METABOLIC_PROCESS		47	0.1511388	1.2165623	0.22961374	0.6959436	1.0	1616	tags=38%, list=23%, signal=50%
H2O2_CSBDIFF_C2	H2O2_CSBDIFF_C2		17	0.2509787	1.2165253	0.22637795	0.6929798	1.0	4796	tags=94%, list=69%, signal=304%
GH_GHRHR_KO_24HRS_UP	GH_GHRHR_KO_24HRS_UP		74	0.12165312	1.2154217	0.21386139	0.6927243	1.0	4512	tags=77%, list=65%, signal=218%
REGULATION_OF_MITOSIS	REGULATION_OF_MITOSIS		17	0.24327652	1.2141138	0.22175732	0.6928159	1.0	2807	tags=65%, list=40%, signal=108%
CMV_HCMV_TIMECOURSE_6HRS_DN	CMV_HCMV_TIMECOURSE_6HRS_DN		27	0.20067576	1.213869	0.24586777	0.6904381	1.0	4269	tags=81%, list=61%, signal=211%
SMALL_GTPASE_MEDIATED_SIGNAL_TRANSDUCTION	SMALL_GTPASE_MEDIATED_SIGNAL_TRANSDUCTION		36	0.17191018	1.21233	0.2394958	0.6912813	1.0	3055	tags=61%, list=44%, signal=109%
KINASE_REGULATOR_ACTIVITY	KINASE_REGULATOR_ACTIVITY		31	0.18168664	1.210974	0.21020408	0.6916556	1.0	3895	tags=74%, list=56%, signal=168%
REGULATION_OF_KINASE_ACTIVITY	REGULATION_OF_KINASE_ACTIVITY		65	0.12504725	1.2106398	0.20416667	0.6896005	1.0	4694	tags=80%, list=68%, signal=245%
ET743_RESIST_DN	ET743_RESIST_DN		21	0.21883577	1.2090871	0.21327968	0.69079286	1.0	468	tags=29%, list=7%, signal=31%
GENERATION_OF_PRECURSOR_METABOLITES_AND_ENERGY	GENERATION_OF_PRECURSOR_METABOLITES_AND_ENERGY		42	0.15734568	1.2083704	0.22862823	0.68969643	1.0	2881	tags=57%, list=41%, signal=97%
XU_CBP_DN	XU_CBP_DN		16	0.24783488	1.2080618	0.2294455	0.68751866	1.0	2622	tags=63%, list=38%, signal=100%
PHOSPHORIC_ESTER_HYDROLASE_ACTIVITY	PHOSPHORIC_ESTER_HYDROLASE_ACTIVITY		74	0.12152721	1.2073946	0.24375	0.68620294	1.0	384	tags=18%, list=6%, signal=18%
STEFFEN_AML_PML_PLZF_TRGT	STEFFEN_AML_PML_PLZF_TRGT		18	0.23420608	1.2067993	0.22633745	0.68489754	1.0	3392	tags=72%, list=49%, signal=141%
CELL_CYCLE_ARREST	CELL_CYCLE_ARREST		18	0.2366606	1.2054888	0.22156863	0.6852487	1.0	3375	tags=72%, list=49%, signal=140%
BYSTRYKH_HSC_CIS_GLOCUS	BYSTRYKH_HSC_CIS_GLOCUS		43	0.15774594	1.2043132	0.21850394	0.68544453	1.0	4401	tags=79%, list=63%, signal=215%
METASTASIS_ADENOCARC_DN	METASTASIS_ADENOCARC_DN		17	0.24307272	1.2041372	0.23404256	0.6830593	1.0	1583	tags=47%, list=23%, signal=61%
RUTELLA_HEPATGFSNDCS_UP	RUTELLA_HEPATGFSNDCS_UP		57	0.1374061	1.2008628	0.26	0.6882066	1.0	1611	tags=37%, list=23%, signal=48%
APOPTOSIS_GENMAPP	APOPTOSIS_GENMAPP		20	0.22992492	1.1983122	0.24852072	0.69146645	1.0	1879	tags=50%, list=27%, signal=68%
REGULATION_OF_CELLULAR_METABOLIC_PROCESS	REGULATION_OF_CELLULAR_METABOLIC_PROCESS		400	0.053924184	1.1978498	0.2520661	0.68975246	1.0	1955	tags=33%, list=28%, signal=44%
HSC_INTERMEDIATEPROGENITORS_FETAL	HSC_INTERMEDIATEPROGENITORS_FETAL		51	0.14064004	1.1969117	0.22975518	0.6893709	1.0	4612	tags=80%, list=66%, signal=238%
RUIZ_TENASCIN_TARGETS	RUIZ_TENASCIN_TARGETS		42	0.15604171	1.195933	0.24804688	0.6888473	1.0	3386	tags=64%, list=49%, signal=125%
TRANSCRIPTION_INITIATION_FROM_RNA_POLYMERASE_II_PROMOTER	TRANSCRIPTION_INITIATION_FROM_RNA_POLYMERASE_II_PROMOTER		18	0.2339494	1.1952984	0.22828282	0.68769336	1.0	3008	tags=67%, list=43%, signal=117%
4NQO_ESR_WS_UNREG	4NQO_ESR_WS_UNREG		19	0.22899488	1.1946362	0.25506073	0.6867225	1.0	1337	tags=42%, list=19%, signal=52%
POSITIVE_REGULATION_OF_TRANSCRIPTION	POSITIVE_REGULATION_OF_TRANSCRIPTION		83	0.11507683	1.191888	0.22653061	0.69062746	1.0	1803	tags=37%, list=26%, signal=50%
HDACI_COLON_CUR24HRS_UP	HDACI_COLON_CUR24HRS_UP		17	0.240678	1.1899472	0.24746451	0.6925773	1.0	2825	tags=65%, list=41%, signal=109%
EPIDERMAL_GROWTH_FACTOR_RECEPTOR_SIGNALING_PATHWAY	EPIDERMAL_GROWTH_FACTOR_RECEPTOR_SIGNALING_PATHWAY		15	0.25488046	1.189281	0.2388664	0.69143367	1.0	4714	tags=93%, list=68%, signal=290%
ST_ERK1_ERK2_MAPK_PATHWAY	ST_ERK1_ERK2_MAPK_PATHWAY		18	0.23603493	1.1889055	0.24810606	0.6895654	1.0	2222	tags=56%, list=32%, signal=81%
CELL_CYCLE_ARREST_GO_0007050	CELL_CYCLE_ARREST_GO_0007050		27	0.19556221	1.188382	0.24899599	0.6881452	1.0	3790	tags=74%, list=55%, signal=162%
CYTOSOL	CYTOSOL		79	0.11189397	1.1865336	0.22179732	0.6898858	1.0	2571	tags=48%, list=37%, signal=76%
NEGATIVE_REGULATION_OF_NUCLEOBASE__NUCLEOSIDE__NUCLEOTIDE_AND_NUCLEIC_ACID_METABOLIC_PROCESS	NEGATIVE_REGULATION_OF_NUCLEOBASE__NUCLEOSIDE__NUCLEOTIDE_AND_NUCLEIC_ACID_METABOLIC_PROCESS		112	0.094262324	1.1863675	0.24901961	0.6876601	1.0	1897	tags=37%, list=27%, signal=50%
HSA00590_ARACHIDONIC_ACID_METABOLISM	HSA00590_ARACHIDONIC_ACID_METABOLISM		16	0.24884526	1.1860228	0.2675522	0.6857967	1.0	3917	tags=81%, list=56%, signal=186%
UVC_HIGH_D5_DN	UVC_HIGH_D5_DN		24	0.20438345	1.1852764	0.23856859	0.6849507	1.0	2346	tags=54%, list=34%, signal=82%
HTERT_UP	HTERT_UP		31	0.17821492	1.1827494	0.23703703	0.6883806	1.0	3695	tags=71%, list=53%, signal=151%
BREASTCA_TWO_CLASSES	BREASTCA_TWO_CLASSES		72	0.11837084	1.1813476	0.232	0.6889861	1.0	5358	tags=89%, list=77%, signal=385%
STRESS_ACTIVATED_PROTEIN_KINASE_SIGNALING_PATHWAY	STRESS_ACTIVATED_PROTEIN_KINASE_SIGNALING_PATHWAY		15	0.24802041	1.1806836	0.256	0.68793446	1.0	1521	tags=47%, list=22%, signal=60%
POSITIVE_REGULATION_OF_SIGNAL_TRANSDUCTION	POSITIVE_REGULATION_OF_SIGNAL_TRANSDUCTION		64	0.12260175	1.1802877	0.2421875	0.68627316	1.0	2736	tags=52%, list=39%, signal=84%
FSH_OVARY_MCV152_UP	FSH_OVARY_MCV152_UP		25	0.1947796	1.1798908	0.25855514	0.6845908	1.0	3651	tags=72%, list=53%, signal=151%
ROSS_AML1_ETO	ROSS_AML1_ETO		27	0.18947415	1.1789297	0.25150904	0.68429166	1.0	2289	tags=52%, list=33%, signal=77%
TPA_RESIST_MIDDLE_UP	TPA_RESIST_MIDDLE_UP		22	0.2084789	1.1769567	0.25775194	0.68633544	1.0	1081	tags=36%, list=16%, signal=43%
HSA01031_GLYCAN_STRUCTURES_BIOSYNTHESIS_2	HSA01031_GLYCAN_STRUCTURES_BIOSYNTHESIS_2		23	0.20358334	1.176524	0.23529412	0.6848301	1.0	5534	tags=100%, list=80%, signal=491%
BYSTROM_IL5_DN	BYSTROM_IL5_DN		40	0.15886444	1.1719668	0.25158563	0.69302833	1.0	2027	tags=45%, list=29%, signal=63%
HSA05214_GLIOMA	HSA05214_GLIOMA		35	0.1705312	1.1717064	0.24801587	0.6909929	1.0	4376	tags=80%, list=63%, signal=215%
BRENTANI_DEATH	BRENTANI_DEATH		28	0.18840371	1.1706566	0.25708503	0.6909996	1.0	1424	tags=39%, list=21%, signal=49%
WNT_SIGNALING	WNT_SIGNALING		30	0.181834	1.1696221	0.27565393	0.6909595	1.0	4297	tags=80%, list=62%, signal=209%
TARTE_MATURE_PC	TARTE_MATURE_PC		115	0.09357406	1.1677996	0.2494759	0.6928309	1.0	3466	tags=59%, list=50%, signal=116%
HSA04916_MELANOGENESIS	HSA04916_MELANOGENESIS		51	0.13833588	1.1657801	0.2615063	0.69518185	1.0	2994	tags=57%, list=43%, signal=99%
TARTE_PC	TARTE_PC		30	0.17429373	1.1626633	0.25153375	0.70024365	1.0	1803	tags=43%, list=26%, signal=58%
OLDAGE_DN	OLDAGE_DN		21	0.21002457	1.1624767	0.27906978	0.6980721	1.0	5489	tags=100%, list=79%, signal=476%
OLDONLY_FIBRO_DN	OLDONLY_FIBRO_DN		24	0.20024088	1.1603243	0.27145708	0.7005819	1.0	4400	tags=83%, list=63%, signal=227%
ASTON_DEPRESSION_UP	ASTON_DEPRESSION_UP		18	0.2264575	1.1533036	0.28373015	0.71449316	1.0	4603	tags=89%, list=66%, signal=263%
REGULATION_OF_SIGNAL_TRANSDUCTION	REGULATION_OF_SIGNAL_TRANSDUCTION		106	0.09660222	1.1473191	0.26774848	0.72653997	1.0	3269	tags=57%, list=47%, signal=105%
TRANSCRIPTION_COFACTOR_ACTIVITY	TRANSCRIPTION_COFACTOR_ACTIVITY		102	0.09702475	1.1461749	0.28486055	0.7267853	1.0	2671	tags=48%, list=38%, signal=77%
HSA05218_MELANOMA	HSA05218_MELANOMA		32	0.16666667	1.1418706	0.2675522	0.7345818	1.0	1017	tags=31%, list=15%, signal=36%
IDX_TSA_DN_CLUSTER1	IDX_TSA_DN_CLUSTER1		18	0.22515805	1.1417209	0.28838176	0.7323529	1.0	4612	tags=89%, list=66%, signal=264%
HSA05212_PANCREATIC_CANCER	HSA05212_PANCREATIC_CANCER		43	0.14702286	1.1412212	0.2826923	0.73097324	1.0	4475	tags=79%, list=64%, signal=221%
MUSCLE_DEVELOPMENT	MUSCLE_DEVELOPMENT		34	0.16523366	1.1404318	0.28742516	0.73036104	1.0	2125	tags=47%, list=31%, signal=67%
HUMAN_CD34_ENRICHED_TRANSCRIPTION_FACTORS	HUMAN_CD34_ENRICHED_TRANSCRIPTION_FACTORS		93	0.101688325	1.139114	0.2761194	0.73091644	1.0	4305	tags=72%, list=62%, signal=187%
PAR1PATHWAY	PAR1PATHWAY		15	0.2429403	1.1371113	0.270751	0.7333022	1.0	2945	tags=67%, list=42%, signal=116%
ATPASE_ACTIVITY__COUPLED_TO_MOVEMENT_OF_SUBSTANCES	ATPASE_ACTIVITY__COUPLED_TO_MOVEMENT_OF_SUBSTANCES		20	0.21192956	1.1335086	0.2774674	0.7393836	1.0	4434	tags=85%, list=64%, signal=234%
AGEING_KIDNEY_UP	AGEING_KIDNEY_UP		152	0.076731116	1.1314824	0.25708503	0.74182594	1.0	4229	tags=68%, list=61%, signal=171%
ACTIN_BINDING	ACTIN_BINDING		34	0.16493571	1.1298833	0.28239846	0.7432225	1.0	2944	tags=59%, list=42%, signal=102%
CHIARETTI_T_ALL	CHIARETTI_T_ALL		122	0.08871728	1.1276746	0.29757085	0.74601144	1.0	2012	tags=38%, list=29%, signal=52%
CLATHRIN_COATED_VESICLE	CLATHRIN_COATED_VESICLE		17	0.22658141	1.1270355	0.31111112	0.7449528	1.0	4965	tags=94%, list=72%, signal=329%
POSITIVE_REGULATION_OF_CATALYTIC_ACTIVITY	POSITIVE_REGULATION_OF_CATALYTIC_ACTIVITY		69	0.11422821	1.1268588	0.29540917	0.7428623	1.0	2736	tags=51%, list=39%, signal=83%
DNA_DEPENDENT_DNA_REPLICATION	DNA_DEPENDENT_DNA_REPLICATION		21	0.208869	1.1264676	0.3007968	0.74129266	1.0	2521	tags=57%, list=36%, signal=89%
G1_TO_S_CELL_CYCLE_REACTOME	G1_TO_S_CELL_CYCLE_REACTOME		30	0.1733006	1.1213803	0.30417496	0.7512912	1.0	4356	tags=80%, list=63%, signal=214%
UDP_GLYCOSYLTRANSFERASE_ACTIVITY	UDP_GLYCOSYLTRANSFERASE_ACTIVITY		22	0.19919363	1.1213338	0.30942622	0.74885	1.0	514	tags=27%, list=7%, signal=29%
PENG_GLUTAMINE_UP	PENG_GLUTAMINE_UP		87	0.10325048	1.1192032	0.31782946	0.7514912	1.0	3202	tags=56%, list=46%, signal=103%
PROTEIN_METABOLIC_PROCESS	PROTEIN_METABOLIC_PROCESS		498	0.044911847	1.1187681	0.2997988	0.7500018	1.0	4297	tags=66%, list=62%, signal=161%
REGULATION_OF_PROTEIN_KINASE_ACTIVITY	REGULATION_OF_PROTEIN_KINASE_ACTIVITY		63	0.11860364	1.1177351	0.28600824	0.74988645	1.0	4694	tags=79%, list=68%, signal=243%
MYOD_NIH3T3_DN	MYOD_NIH3T3_DN		26	0.18476886	1.1154054	0.30897704	0.75291973	1.0	2994	tags=62%, list=43%, signal=108%
ANATOMICAL_STRUCTURE_DEVELOPMENT	ANATOMICAL_STRUCTURE_DEVELOPMENT		395	0.049877178	1.1153789	0.31343284	0.75045925	1.0	3452	tags=54%, list=50%, signal=102%
HSA04510_FOCAL_ADHESION	HSA04510_FOCAL_ADHESION		90	0.102908276	1.1137208	0.3006012	0.75231564	1.0	3923	tags=67%, list=56%, signal=151%
HDACI_COLON_BUT_UP	HDACI_COLON_BUT_UP		81	0.10406129	1.1132946	0.3127572	0.75081706	1.0	5543	tags=90%, list=80%, signal=441%
HDACI_COLON_BUT12HRS_UP	HDACI_COLON_BUT12HRS_UP		20	0.20765458	1.1120688	0.30612245	0.7512219	1.0	5158	tags=95%, list=74%, signal=368%
KINASE_INHIBITOR_ACTIVITY	KINASE_INHIBITOR_ACTIVITY		18	0.21428116	1.1114222	0.31692913	0.75025034	1.0	3530	tags=72%, list=51%, signal=147%
HSA04730_LONG_TERM_DEPRESSION	HSA04730_LONG_TERM_DEPRESSION		37	0.15300578	1.111291	0.32586557	0.74811924	1.0	1945	tags=43%, list=28%, signal=60%
NUCLEAR_RECEPTORS	NUCLEAR_RECEPTORS		21	0.2033319	1.109573	0.3130252	0.74988455	1.0	3882	tags=76%, list=56%, signal=172%
MOOTHA_VOXPHOS	MOOTHA_VOXPHOS		15	0.23697504	1.1086972	0.33069307	0.74953645	1.0	5301	tags=100%, list=76%, signal=422%
CYTOKINE_BINDING	CYTOKINE_BINDING		15	0.24264205	1.1079688	0.3201581	0.74896777	1.0	3410	tags=73%, list=49%, signal=144%
GENOTOXINS_4HRS_DISCR	GENOTOXINS_4HRS_DISCR		15	0.23471402	1.1068949	0.31790745	0.74921966	1.0	3002	tags=67%, list=43%, signal=117%
POSITIVE_REGULATION_OF_NUCLEOBASE__NUCLEOSIDE__NUCLEOTIDE_AND_NUCLEIC_ACID_METABOLIC_PROCESS	POSITIVE_REGULATION_OF_NUCLEOBASE__NUCLEOSIDE__NUCLEOTIDE_AND_NUCLEIC_ACID_METABOLIC_PROCESS		89	0.10038274	1.1068939	0.31746033	0.7468172	1.0	3212	tags=56%, list=46%, signal=103%
HINATA_NFKB_UP	HINATA_NFKB_UP		47	0.13713333	1.1061991	0.33333334	0.7459519	1.0	4372	tags=77%, list=63%, signal=205%
FCER1PATHWAY	FCER1PATHWAY		21	0.19986519	1.1061591	0.30040324	0.74366975	1.0	3906	tags=76%, list=56%, signal=174%
IRITANI_ADPROX_LYMPH	IRITANI_ADPROX_LYMPH		60	0.12270002	1.1037822	0.34257427	0.74722654	1.0	3205	tags=58%, list=46%, signal=107%
HDACI_COLON_SUL16HRS_DN	HDACI_COLON_SUL16HRS_DN		36	0.15907481	1.1037598	0.34489402	0.7449129	1.0	4301	tags=78%, list=62%, signal=203%
UVC_HIGH_D8_DN	UVC_HIGH_D8_DN		19	0.20976631	1.1016372	0.326572	0.7477069	1.0	3663	tags=74%, list=53%, signal=156%
HSA05217_BASAL_CELL_CARCINOMA	HSA05217_BASAL_CELL_CARCINOMA		23	0.19108827	1.1008618	0.33669356	0.74717623	1.0	3809	tags=74%, list=55%, signal=163%
AGED_MOUSE_CEREBELLUM_DN	AGED_MOUSE_CEREBELLUM_DN		17	0.21915098	1.1003523	0.33966243	0.74601716	1.0	4608	tags=88%, list=66%, signal=262%
LH_GRANULOSA_DN	LH_GRANULOSA_DN		37	0.14876409	1.0989712	0.29101562	0.7469392	1.0	2725	tags=54%, list=39%, signal=88%
CELLCYCLEPATHWAY	CELLCYCLEPATHWAY		17	0.21634015	1.0953099	0.32405567	0.75344765	1.0	4219	tags=82%, list=61%, signal=209%
HYDROLASE_ACTIVITY__ACTING_ON_ACID_ANHYDRIDES__CATALYZING_TRANSMEMBRANE_MOVEMENT_OF_SUBSTANCES	HYDROLASE_ACTIVITY__ACTING_ON_ACID_ANHYDRIDES__CATALYZING_TRANSMEMBRANE_MOVEMENT_OF_SUBSTANCES		19	0.20592819	1.0952488	0.3272727	0.75124395	1.0	4786	tags=89%, list=69%, signal=287%
OLD_FIBRO_DN	OLD_FIBRO_DN		71	0.107864395	1.093467	0.33595285	0.7530694	1.0	4539	tags=76%, list=65%, signal=217%
MAPKPATHWAY	MAPKPATHWAY		40	0.14550988	1.092878	0.31578946	0.75214237	1.0	4376	tags=78%, list=63%, signal=208%
NELSON_ANDROGEN_UP	NELSON_ANDROGEN_UP		36	0.15484463	1.0912977	0.3253012	0.75354546	1.0	1244	tags=33%, list=18%, signal=40%
RESPONSE_TO_WOUNDING	RESPONSE_TO_WOUNDING		70	0.11018332	1.0905926	0.34	0.75284094	1.0	3904	tags=67%, list=56%, signal=152%
AGED_MOUSE_CEREBELLUM_UP	AGED_MOUSE_CEREBELLUM_UP		16	0.22517322	1.089257	0.33808553	0.753761	1.0	4515	tags=88%, list=65%, signal=250%
STAEGE_EFTS_UP	STAEGE_EFTS_UP		15	0.23173138	1.0871047	0.3444882	0.7565324	1.0	708	tags=33%, list=10%, signal=37%
GOLGI_APPARATUS_PART	GOLGI_APPARATUS_PART		47	0.13350856	1.0869957	0.33794466	0.7544262	1.0	4397	tags=77%, list=63%, signal=207%
HSC_HSC_ADULT	HSC_HSC_ADULT		123	0.08534976	1.0866164	0.32149902	0.7529791	1.0	5514	tags=88%, list=79%, signal=419%
HOFMANN_MANTEL_LYMPHOMA_VS_LYMPH_NODES_UP	HOFMANN_MANTEL_LYMPHOMA_VS_LYMPH_NODES_UP		30	0.16743806	1.0839996	0.3339806	0.7569077	1.0	1156	tags=33%, list=17%, signal=40%
IDX_TSA_DN_CLUSTER5	IDX_TSA_DN_CLUSTER5		29	0.16844939	1.0837424	0.32783505	0.75520676	1.0	1947	tags=45%, list=28%, signal=62%
HSA00650_BUTANOATE_METABOLISM	HSA00650_BUTANOATE_METABOLISM		19	0.20658942	1.0826699	0.34226805	0.7555192	1.0	3685	tags=74%, list=53%, signal=157%
POSITIVE_REGULATION_OF_TRANSFERASE_ACTIVITY	POSITIVE_REGULATION_OF_TRANSFERASE_ACTIVITY		34	0.15667827	1.081115	0.34705883	0.75693876	1.0	3818	tags=71%, list=55%, signal=156%
RAS_PROTEIN_SIGNAL_TRANSDUCTION	RAS_PROTEIN_SIGNAL_TRANSDUCTION		28	0.16772702	1.0796982	0.35700575	0.7581041	1.0	3055	tags=61%, list=44%, signal=108%
POSITIVE_REGULATION_OF_MAP_KINASE_ACTIVITY	POSITIVE_REGULATION_OF_MAP_KINASE_ACTIVITY		20	0.20060661	1.0796603	0.32692307	0.7559398	1.0	3818	tags=75%, list=55%, signal=166%
NEGATIVE_REGULATION_OF_TRANSCRIPTION_FROM_RNA_POLYMERASE_II_PROMOTER	NEGATIVE_REGULATION_OF_TRANSCRIPTION_FROM_RNA_POLYMERASE_II_PROMOTER		44	0.13710146	1.0790823	0.34901962	0.75501543	1.0	789	tags=25%, list=11%, signal=28%
HDACI_COLON_BUT24HRS_UP	HDACI_COLON_BUT24HRS_UP		32	0.15827546	1.0762515	0.34257427	0.7596031	1.0	5415	tags=94%, list=78%, signal=424%
NEGATIVE_REGULATION_OF_TRANSCRIPTION	NEGATIVE_REGULATION_OF_TRANSCRIPTION		108	0.08916845	1.0756384	0.3493014	0.7588798	1.0	1897	tags=36%, list=27%, signal=49%
CMV_HCMV_TIMECOURSE_20HRS_DN	CMV_HCMV_TIMECOURSE_20HRS_DN		21	0.19485773	1.0751187	0.3263158	0.75785315	1.0	3610	tags=71%, list=52%, signal=148%
TRANSCRIPTION_ACTIVATOR_ACTIVITY	TRANSCRIPTION_ACTIVATOR_ACTIVITY		87	0.09869268	1.0705559	0.36132812	0.76645607	1.0	5947	tags=95%, list=86%, signal=656%
VASCULATURE_DEVELOPMENT	VASCULATURE_DEVELOPMENT		23	0.1837194	1.0692219	0.34979424	0.76734287	1.0	3860	tags=74%, list=56%, signal=166%
REGULATION_OF_DEVELOPMENTAL_PROCESS	REGULATION_OF_DEVELOPMENTAL_PROCESS		172	0.06993226	1.0688975	0.3444227	0.765829	1.0	3603	tags=59%, list=52%, signal=119%
FSH_GRANULOSA_DN	FSH_GRANULOSA_DN		37	0.14876409	1.0688002	0.36157024	0.7638235	1.0	2725	tags=54%, list=39%, signal=88%
PRIMARY_ACTIVE_TRANSMEMBRANE_TRANSPORTER_ACTIVITY	PRIMARY_ACTIVE_TRANSMEMBRANE_TRANSPORTER_ACTIVITY		19	0.20592819	1.0665311	0.34280303	0.7670017	1.0	4786	tags=89%, list=69%, signal=287%
ADIP_DIFF_CLUSTER5	ADIP_DIFF_CLUSTER5		15	0.22615097	1.0624405	0.35912699	0.7744389	1.0	5376	tags=100%, list=77%, signal=442%
SIG_REGULATION_OF_THE_ACTIN_CYTOSKELETON_BY_RHO_GTPASES	SIG_REGULATION_OF_THE_ACTIN_CYTOSKELETON_BY_RHO_GTPASES		16	0.2219977	1.0594167	0.3529412	0.7793797	1.0	4537	tags=88%, list=65%, signal=252%
HSA04210_APOPTOSIS	HSA04210_APOPTOSIS		41	0.14084013	1.0577992	0.3562753	0.7807767	1.0	1906	tags=41%, list=27%, signal=57%
BREASTCA_THREE_CLASSES	BREASTCA_THREE_CLASSES		15	0.2266128	1.0575101	0.36491936	0.77921456	1.0	3984	tags=80%, list=57%, signal=187%
ADIP_DIFF_CLUSTER2	ADIP_DIFF_CLUSTER2		23	0.1870175	1.056432	0.41210938	0.7795383	1.0	4441	tags=83%, list=64%, signal=228%
ET743_SARCOMA_UP	ET743_SARCOMA_UP		24	0.18164743	1.0556604	0.39121756	0.7791257	1.0	4818	tags=88%, list=69%, signal=285%
WERNER_FIBRO_UP	WERNER_FIBRO_UP		30	0.16309905	1.0556597	0.3811395	0.776906	1.0	1186	tags=33%, list=17%, signal=40%
LIPID_METABOLIC_PROCESS	LIPID_METABOLIC_PROCESS		103	0.088079706	1.0546198	0.38326848	0.7772907	1.0	3846	tags=64%, list=55%, signal=141%
REGULATION_OF_GROWTH	REGULATION_OF_GROWTH		23	0.18655892	1.0518305	0.3884462	0.78163946	1.0	5048	tags=91%, list=73%, signal=333%
ROSS_PML_RAR	ROSS_PML_RAR		25	0.17232548	1.049616	0.38310412	0.7846342	1.0	751	tags=28%, list=11%, signal=31%
REGULATION_OF_I_KAPPAB_KINASE_NF_KAPPAB_CASCADE	REGULATION_OF_I_KAPPAB_KINASE_NF_KAPPAB_CASCADE		46	0.13032764	1.0494983	0.37015504	0.7826896	1.0	2572	tags=50%, list=37%, signal=79%
BRG1_SW13_UP	BRG1_SW13_UP		17	0.21178	1.0494893	0.359375	0.78052294	1.0	5476	tags=100%, list=79%, signal=472%
NING_COPD_DN	NING_COPD_DN		40	0.14183085	1.0492982	0.37349397	0.77879786	1.0	3707	tags=68%, list=53%, signal=144%
MYOD_NIH3T3_UP	MYOD_NIH3T3_UP		31	0.16027771	1.0488001	0.3802521	0.77773076	1.0	2475	tags=52%, list=36%, signal=80%
FLECHNER_KIDNEY_TRANSPLANT_WELL_PBL_UP	FLECHNER_KIDNEY_TRANSPLANT_WELL_PBL_UP		46	0.13446243	1.0487471	0.37724552	0.77565485	1.0	4204	tags=74%, list=61%, signal=186%
HSA05220_CHRONIC_MYELOID_LEUKEMIA	HSA05220_CHRONIC_MYELOID_LEUKEMIA		45	0.12961301	1.0463209	0.38716355	0.7792672	1.0	4660	tags=80%, list=67%, signal=242%
DORSAM_HOXA9_UP	DORSAM_HOXA9_UP		20	0.19116119	1.0451322	0.39130434	0.78000563	1.0	1453	tags=40%, list=21%, signal=50%
ROSS_CBF	ROSS_CBF		32	0.15668403	1.0450077	0.38715953	0.7781561	1.0	869	tags=28%, list=13%, signal=32%
HSA04612_ANTIGEN_PROCESSING_AND_PRESENTATION	HSA04612_ANTIGEN_PROCESSING_AND_PRESENTATION		27	0.16839887	1.044452	0.38342968	0.77732545	1.0	5521	tags=96%, list=80%, signal=468%
AGEING_KIDNEY_SPECIFIC_UP	AGEING_KIDNEY_SPECIFIC_UP		72	0.10537123	1.0432323	0.41699606	0.778071	1.0	5158	tags=85%, list=74%, signal=326%
ADDYA_K562_HEMIN_TREATMENT	ADDYA_K562_HEMIN_TREATMENT		29	0.16825989	1.0425434	0.36653388	0.7775517	1.0	3385	tags=66%, list=49%, signal=127%
INOS_ALL_UP	INOS_ALL_UP		21	0.19177622	1.0421537	0.3909465	0.7763536	1.0	4954	tags=90%, list=71%, signal=315%
CMV_ALL_UP	CMV_ALL_UP		40	0.13887605	1.041742	0.38276553	0.775128	1.0	4769	tags=83%, list=69%, signal=262%
PROTEIN_HOMODIMERIZATION_ACTIVITY	PROTEIN_HOMODIMERIZATION_ACTIVITY		45	0.13167128	1.041473	0.39711934	0.773647	1.0	3257	tags=60%, list=47%, signal=112%
RNA_BINDING	RNA_BINDING		111	0.08291245	1.0379623	0.41764706	0.7797026	1.0	3749	tags=62%, list=54%, signal=133%
FALT_BCLL_DN	FALT_BCLL_DN		25	0.16978177	1.0378965	0.37951806	0.77775794	1.0	4935	tags=88%, list=71%, signal=303%
TPA_SENS_LATE_DN	TPA_SENS_LATE_DN		100	0.08895383	1.0377724	0.40853658	0.7758848	1.0	779	tags=20%, list=11%, signal=22%
PROTEIN_PROCESSING	PROTEIN_PROCESSING		23	0.17991248	1.0366061	0.4074844	0.77641886	1.0	5094	tags=91%, list=73%, signal=342%
HDACI_COLON_TSA_UP	HDACI_COLON_TSA_UP		54	0.12058809	1.0360702	0.37957612	0.77556884	1.0	1740	tags=37%, list=25%, signal=49%
IDX_TSA_DN_CLUSTER3	IDX_TSA_DN_CLUSTER3		42	0.13305321	1.0328628	0.4194831	0.78091335	1.0	2718	tags=52%, list=39%, signal=86%
TPA_RESIST_MIDDLE_DN	TPA_RESIST_MIDDLE_DN		53	0.121638015	1.0326501	0.42362526	0.77932805	1.0	602	tags=21%, list=9%, signal=23%
APOPTOSIS	APOPTOSIS		33	0.15423809	1.0308803	0.39960238	0.7811808	1.0	1879	tags=42%, list=27%, signal=58%
HTERT_DN	HTERT_DN		26	0.17025824	1.0303555	0.38722554	0.7803129	1.0	5231	tags=92%, list=75%, signal=373%
POSITIVE_REGULATION_OF_TRANSCRIPTION__DNA_DEPENDENT	POSITIVE_REGULATION_OF_TRANSCRIPTION__DNA_DEPENDENT		69	0.10388406	1.0294598	0.3958763	0.78041995	1.0	895	tags=23%, list=13%, signal=26%
HDACI_COLON_CUR48HRS_UP	HDACI_COLON_CUR48HRS_UP		28	0.16338927	1.0283924	0.38922155	0.78077614	1.0	3829	tags=71%, list=55%, signal=159%
TARTE_PLASMA_BLASTIC	TARTE_PLASMA_BLASTIC		110	0.08250988	1.0234406	0.39583334	0.7902685	1.0	2844	tags=49%, list=41%, signal=82%
NEGATIVE_REGULATION_OF_CELL_PROLIFERATION	NEGATIVE_REGULATION_OF_CELL_PROLIFERATION		67	0.10610971	1.0227767	0.42510122	0.7896952	1.0	6006	tags=97%, list=86%, signal=711%
SCHRAETS_MLL_UP	SCHRAETS_MLL_UP		16	0.2105947	1.0227162	0.39285713	0.787741	1.0	5050	tags=94%, list=73%, signal=343%
TGF_BETA_SIGNALING_PATHWAY	TGF_BETA_SIGNALING_PATHWAY		31	0.15246633	1.0222384	0.41327623	0.78674394	1.0	4097	tags=74%, list=59%, signal=180%
SHIPP_FL_VS_DLBCL_UP	SHIPP_FL_VS_DLBCL_UP		16	0.21463627	1.0210032	0.41266796	0.7876684	1.0	1116	tags=38%, list=16%, signal=45%
PEPTIDE_BINDING	PEPTIDE_BINDING		31	0.156806	1.019467	0.4105691	0.78913486	1.0	1155	tags=32%, list=17%, signal=39%
ACTIVATION_OF_MAPK_ACTIVITY	ACTIVATION_OF_MAPK_ACTIVITY		16	0.2105947	1.0185622	0.4	0.78913486	1.0	4616	tags=88%, list=66%, signal=260%
TRANSCRIPTION_INITIATION	TRANSCRIPTION_INITIATION		19	0.19879918	1.0183669	0.425	0.7875762	1.0	3008	tags=63%, list=43%, signal=111%
PROTEIN_KINASE_ACTIVITY	PROTEIN_KINASE_ACTIVITY		131	0.07770171	1.0166324	0.41346154	0.7895473	1.0	2120	tags=38%, list=31%, signal=54%
MACROMOLECULE_BIOSYNTHETIC_PROCESS	MACROMOLECULE_BIOSYNTHETIC_PROCESS		110	0.08414076	1.0162464	0.41883767	0.7884201	1.0	3401	tags=57%, list=49%, signal=110%
AMINO_ACID_AND_DERIVATIVE_METABOLIC_PROCESS	AMINO_ACID_AND_DERIVATIVE_METABOLIC_PROCESS		34	0.15091512	1.0160962	0.4259635	0.7867945	1.0	1407	tags=35%, list=20%, signal=44%
HDACI_COLON_BUT2HRS_UP	HDACI_COLON_BUT2HRS_UP		31	0.15507011	1.0139861	0.43326488	0.7894914	1.0	5199	tags=90%, list=75%, signal=358%
REGULATION_OF_CATALYTIC_ACTIVITY	REGULATION_OF_CATALYTIC_ACTIVITY		114	0.082070835	1.0138494	0.42827868	0.7877537	1.0	4616	tags=75%, list=66%, signal=219%
TRANSMEMBRANE_TRANSPORTER_ACTIVITY	TRANSMEMBRANE_TRANSPORTER_ACTIVITY		137	0.07390739	1.0131772	0.41	0.7872725	1.0	3196	tags=53%, list=46%, signal=97%
INTRACELLULAR_NON_MEMBRANE_BOUND_ORGANELLE	INTRACELLULAR_NON_MEMBRANE_BOUND_ORGANELLE		242	0.05570551	1.0128615	0.41732284	0.78599906	1.0	5881	tags=90%, list=85%, signal=568%
CMV_24HRS_UP	CMV_24HRS_UP		30	0.15494171	1.0106299	0.40954274	0.7890702	1.0	4020	tags=73%, list=58%, signal=173%
ZHAN_MMPC_SIM_BC_AND_MM	ZHAN_MMPC_SIM_BC_AND_MM		19	0.18891127	1.0089777	0.4218107	0.79075134	1.0	2711	tags=58%, list=39%, signal=95%
SEXUAL_REPRODUCTION	SEXUAL_REPRODUCTION		46	0.12348256	1.0058789	0.45306122	0.7958674	1.0	3374	tags=61%, list=49%, signal=118%
PERINUCLEAR_REGION_OF_CYTOPLASM	PERINUCLEAR_REGION_OF_CYTOPLASM		27	0.16282484	1.0024399	0.42443064	0.801727	1.0	4788	tags=85%, list=69%, signal=273%
UV-CMV_UNIQUE_HCMV_6HRS_DN	UV-CMV_UNIQUE_HCMV_6HRS_DN		42	0.1291413	0.9989322	0.43106797	0.80775267	1.0	1753	tags=38%, list=25%, signal=51%
DAC_PANC_UP	DAC_PANC_UP		106	0.08263477	0.9981768	0.4266145	0.8074228	1.0	3299	tags=56%, list=48%, signal=104%
HOFFMANN_BIVSBII_LGBII	HOFFMANN_BIVSBII_LGBII		38	0.13646409	0.99526393	0.45531914	0.81187105	1.0	3625	tags=66%, list=52%, signal=137%
GH_AUTOCRINE_DN	GH_AUTOCRINE_DN		67	0.1020425	0.9950467	0.47443762	0.8103979	1.0	3132	tags=55%, list=45%, signal=100%
TRANSMEMBRANE_RECEPTOR_PROTEIN_TYROSINE_KINASE_SIGNALING_PATHWAY	TRANSMEMBRANE_RECEPTOR_PROTEIN_TYROSINE_KINASE_SIGNALING_PATHWAY		53	0.1176651	0.9929961	0.46954814	0.81294614	1.0	4953	tags=83%, list=71%, signal=287%
ROSS_CBF_LEUKEMIA	ROSS_CBF_LEUKEMIA		24	0.17095377	0.9911714	0.44140625	0.81485635	1.0	552	tags=25%, list=8%, signal=27%
ALZHEIMERS_INCIPIENT_UP	ALZHEIMERS_INCIPIENT_UP		167	0.06629769	0.988782	0.43883497	0.81829184	1.0	1504	tags=28%, list=22%, signal=35%
NEGATIVE_REGULATION_OF_CELLULAR_METABOLIC_PROCESS	NEGATIVE_REGULATION_OF_CELLULAR_METABOLIC_PROCESS		128	0.075154044	0.987997	0.4484127	0.8180133	1.0	1928	tags=35%, list=28%, signal=48%
MEMBRANE_LIPID_METABOLIC_PROCESS	MEMBRANE_LIPID_METABOLIC_PROCESS		34	0.14212988	0.98646957	0.46346554	0.8194423	1.0	4327	tags=76%, list=62%, signal=202%
ROSS_CBF_MYH	ROSS_CBF_MYH		22	0.17561924	0.9840743	0.47433266	0.82293856	1.0	2571	tags=55%, list=37%, signal=86%
HSC_MATURE_SHARED	HSC_MATURE_SHARED		110	0.0824088	0.9840421	0.46734694	0.820989	1.0	1014	tags=23%, list=15%, signal=26%
ST_FAS_SIGNALING_PATHWAY	ST_FAS_SIGNALING_PATHWAY		23	0.17269434	0.98369014	0.45147678	0.819758	1.0	1521	tags=39%, list=22%, signal=50%
POSITIVE_REGULATION_OF_METABOLIC_PROCESS	POSITIVE_REGULATION_OF_METABOLIC_PROCESS		119	0.07545789	0.98221797	0.4527559	0.82117826	1.0	3452	tags=57%, list=50%, signal=112%
NUCLEAR_TRANSPORT	NUCLEAR_TRANSPORT		36	0.14003088	0.98168623	0.49601594	0.82037085	1.0	1925	tags=42%, list=28%, signal=57%
KENNY_WNT_DN	KENNY_WNT_DN		17	0.19745412	0.98090225	0.474	0.8200992	1.0	1899	tags=47%, list=27%, signal=65%
HSA04310_WNT_SIGNALING_PATHWAY	HSA04310_WNT_SIGNALING_PATHWAY		85	0.0886804	0.97969097	0.4497992	0.8210701	1.0	4129	tags=68%, list=59%, signal=166%
HSC_INTERMEDIATEPROGENITORS_ADULT	HSC_INTERMEDIATEPROGENITORS_ADULT		50	0.11542211	0.978762	0.4587525	0.8212838	1.0	5314	tags=88%, list=77%, signal=372%
ESR_FIBROBLAST_UP	ESR_FIBROBLAST_UP		21	0.17270933	0.9778792	0.49712092	0.8212541	1.0	1118	tags=33%, list=16%, signal=40%
NUCLEOCYTOPLASMIC_TRANSPORT	NUCLEOCYTOPLASMIC_TRANSPORT		36	0.14003088	0.977301	0.45759368	0.82053787	1.0	1925	tags=42%, list=28%, signal=57%
IRS_KO_ADIP_DN	IRS_KO_ADIP_DN		20	0.17972273	0.97523576	0.46954814	0.82322943	1.0	2921	tags=60%, list=42%, signal=103%
NON_MEMBRANE_BOUND_ORGANELLE	NON_MEMBRANE_BOUND_ORGANELLE		242	0.05570551	0.9735239	0.4665392	0.82507116	1.0	5881	tags=90%, list=85%, signal=568%
HSC_MATURE_FETAL	HSC_MATURE_FETAL		136	0.07460946	0.9733839	0.47265625	0.82341117	1.0	1176	tags=24%, list=17%, signal=29%
CELL_CYCLE_CHECKPOINT_GO_0000075	CELL_CYCLE_CHECKPOINT_GO_0000075		15	0.20451245	0.97118413	0.46705428	0.8264036	1.0	5063	tags=93%, list=73%, signal=344%
HSC_INTERMEDIATEPROGENITORS_SHARED	HSC_INTERMEDIATEPROGENITORS_SHARED		45	0.12452049	0.9710634	0.48118812	0.8247176	1.0	5621	tags=93%, list=81%, signal=487%
DNA_PACKAGING	DNA_PACKAGING		16	0.20092379	0.96944404	0.47942388	0.8264463	1.0	343	tags=25%, list=5%, signal=26%
ERKPATHWAY	ERKPATHWAY		17	0.19367522	0.96927756	0.46	0.82486945	1.0	4376	tags=82%, list=63%, signal=222%
POSITIVE_REGULATION_OF_RNA_METABOLIC_PROCESS	POSITIVE_REGULATION_OF_RNA_METABOLIC_PROCESS		70	0.10055281	0.96513546	0.49023438	0.8319662	1.0	895	tags=23%, list=13%, signal=26%
ENZYME_BINDING	ENZYME_BINDING		82	0.09114171	0.9639753	0.507722	0.8325853	1.0	3269	tags=56%, list=47%, signal=105%
VACUOLE	VACUOLE		28	0.1510989	0.96058744	0.4923664	0.8383356	1.0	1186	tags=32%, list=17%, signal=39%
PROTEIN_OLIGOMERIZATION	PROTEIN_OLIGOMERIZATION		18	0.18641512	0.96040386	0.49129593	0.8367905	1.0	251	tags=22%, list=4%, signal=23%
ZHAN_MM_CD138_MS_VS_REST	ZHAN_MM_CD138_MS_VS_REST		25	0.16253795	0.9596704	0.5058594	0.83657146	1.0	1652	tags=40%, list=24%, signal=52%
HYDROLASE_ACTIVITY__ACTING_ON_CARBON_NITROGEN__BUT_NOT_PEPTIDE__BONDS	HYDROLASE_ACTIVITY__ACTING_ON_CARBON_NITROGEN__BUT_NOT_PEPTIDE__BONDS		15	0.20830327	0.9581928	0.48577237	0.8378961	1.0	3185	tags=67%, list=46%, signal=123%
LU_IL4BCELL	LU_IL4BCELL		29	0.14859746	0.9580762	0.49098197	0.836214	1.0	5676	tags=97%, list=82%, signal=527%
GROWTH	GROWTH		29	0.14914103	0.95747256	0.49440297	0.83569753	1.0	4475	tags=79%, list=64%, signal=222%
IGF_VS_PDGF_DN	IGF_VS_PDGF_DN		25	0.15976298	0.95718247	0.5040816	0.83448887	1.0	3060	tags=60%, list=44%, signal=107%
DNA_BINDING	DNA_BINDING		290	0.05005544	0.95670736	0.47940075	0.8336591	1.0	3976	tags=62%, list=57%, signal=139%
HSA05216_THYROID_CANCER	HSA05216_THYROID_CANCER		18	0.18721725	0.9542489	0.48728815	0.8372	1.0	1017	tags=33%, list=15%, signal=39%
PARK_RARALPHA_MOD	PARK_RARALPHA_MOD		25	0.15845643	0.9540417	0.51214576	0.8357944	1.0	1958	tags=44%, list=28%, signal=61%
AGED_MOUSE_NEOCORTEX_UP	AGED_MOUSE_NEOCORTEX_UP		19	0.18600799	0.9529098	0.5073375	0.8363849	1.0	4193	tags=79%, list=60%, signal=199%
P53_SIGNALING	P53_SIGNALING		46	0.11850948	0.9513943	0.47758284	0.83783436	1.0	4465	tags=76%, list=64%, signal=212%
NEGATIVE_REGULATION_OF_METABOLIC_PROCESS	NEGATIVE_REGULATION_OF_METABOLIC_PROCESS		129	0.0723882	0.95132077	0.4952741	0.83609146	1.0	1928	tags=35%, list=28%, signal=47%
BASSO_HCL_DIFF	BASSO_HCL_DIFF		48	0.1177011	0.9512938	0.50308007	0.8342492	1.0	1068	tags=27%, list=15%, signal=32%
PROTEIN_TYROSINE_KINASE_ACTIVITY	PROTEIN_TYROSINE_KINASE_ACTIVITY		28	0.1515327	0.9458671	0.502994	0.84445006	1.0	1927	tags=43%, list=28%, signal=59%
HSA04020_CALCIUM_SIGNALING_PATHWAY	HSA04020_CALCIUM_SIGNALING_PATHWAY		75	0.09452519	0.9449948	0.52589643	0.8445523	1.0	2868	tags=51%, list=41%, signal=85%
INTERPHASE_OF_MITOTIC_CELL_CYCLE	INTERPHASE_OF_MITOTIC_CELL_CYCLE		34	0.13452794	0.94336694	0.5092025	0.8463153	1.0	4788	tags=82%, list=69%, signal=264%
NEGATIVE_REGULATION_OF_CATALYTIC_ACTIVITY	NEGATIVE_REGULATION_OF_CATALYTIC_ACTIVITY		27	0.1565815	0.94068044	0.48809522	0.8502002	1.0	4574	tags=81%, list=66%, signal=238%
GH_GHRHR_KO_6HRS_UP	GH_GHRHR_KO_6HRS_UP		41	0.1245411	0.9373678	0.50097466	0.85547966	1.0	4559	tags=78%, list=66%, signal=226%
NEURON_DEVELOPMENT	NEURON_DEVELOPMENT		21	0.1703019	0.9361349	0.52772075	0.85617065	1.0	5764	tags=100%, list=83%, signal=587%
UVC_HIGH_D6_DN	UVC_HIGH_D6_DN		22	0.16684617	0.93606776	0.49894738	0.85437393	1.0	3263	tags=64%, list=47%, signal=120%
HDACI_COLON_BUT48HRS_UP	HDACI_COLON_BUT48HRS_UP		45	0.11553368	0.9351568	0.5210421	0.85450834	1.0	5683	tags=93%, list=82%, signal=511%
ESTABLISHMENT_OF_CELLULAR_LOCALIZATION	ESTABLISHMENT_OF_CELLULAR_LOCALIZATION		142	0.06665396	0.93409014	0.5277778	0.85488725	1.0	2333	tags=40%, list=34%, signal=59%
HSA04070_PHOSPHATIDYLINOSITOL_SIGNALING_SYSTEM	HSA04070_PHOSPHATIDYLINOSITOL_SIGNALING_SYSTEM		31	0.14320843	0.93219143	0.51663405	0.8572047	1.0	2593	tags=52%, list=37%, signal=82%
PPARAPATHWAY	PPARAPATHWAY		27	0.1470719	0.93200356	0.5340206	0.85570234	1.0	782	tags=26%, list=11%, signal=29%
HSA05221_ACUTE_MYELOID_LEUKEMIA	HSA05221_ACUTE_MYELOID_LEUKEMIA		27	0.14802502	0.9315709	0.53358924	0.85480833	1.0	4376	tags=78%, list=63%, signal=209%
GALINDO_ACT_UP	GALINDO_ACT_UP		29	0.14999373	0.9310498	0.53174603	0.8539704	1.0	4948	tags=86%, list=71%, signal=299%
HALMOS_CEBP_DN	HALMOS_CEBP_DN		19	0.17819497	0.93079895	0.5273834	0.8525814	1.0	5709	tags=100%, list=82%, signal=561%
ENDOSOME_TRANSPORT	ENDOSOME_TRANSPORT		16	0.19529445	0.9297676	0.5067437	0.85298544	1.0	2552	tags=56%, list=37%, signal=89%
HSC_HSCANDPROGENITORS_FETAL	HSC_HSCANDPROGENITORS_FETAL		266	0.04936871	0.9251247	0.5609756	0.86129045	1.0	3559	tags=56%, list=51%, signal=111%
FERRANDO_MLL_T_ALL_DN	FERRANDO_MLL_T_ALL_DN		35	0.13252279	0.9243947	0.5378323	0.8609519	1.0	4837	tags=83%, list=70%, signal=272%
NEGATIVE_REGULATION_OF_CELL_CYCLE	NEGATIVE_REGULATION_OF_CELL_CYCLE		38	0.12389684	0.92417985	0.5410156	0.8595354	1.0	788	tags=24%, list=11%, signal=27%
HSC_HSCANDPROGENITORS_SHARED	HSC_HSCANDPROGENITORS_SHARED		266	0.04936871	0.92162937	0.5257937	0.86349756	1.0	3559	tags=56%, list=51%, signal=111%
NEURITE_DEVELOPMENT	NEURITE_DEVELOPMENT		20	0.17027734	0.9199174	0.5308151	0.8654374	1.0	5764	tags=100%, list=83%, signal=587%
REGULATION_OF_CELL_GROWTH	REGULATION_OF_CELL_GROWTH		20	0.17339692	0.9178364	0.5742972	0.86827433	1.0	5048	tags=90%, list=73%, signal=329%
SMOOTH_MUSCLE_CONTRACTION	SMOOTH_MUSCLE_CONTRACTION		60	0.10048425	0.91781193	0.5711538	0.8664526	1.0	2895	tags=52%, list=42%, signal=88%
CMV_HCMV_TIMECOURSE_24HRS_DN	CMV_HCMV_TIMECOURSE_24HRS_DN		21	0.16736482	0.91779566	0.5852713	0.86462295	1.0	1155	tags=33%, list=17%, signal=40%
BRCA_PROGNOSIS_NEG	BRCA_PROGNOSIS_NEG		48	0.11175562	0.91426563	0.5575049	0.87060535	1.0	1109	tags=27%, list=16%, signal=32%
G13_SIGNALING_PATHWAY	G13_SIGNALING_PATHWAY		21	0.16746113	0.9103594	0.55510205	0.877272	1.0	493	tags=24%, list=7%, signal=26%
TAKEDA_NUP8_HOXA9_16D_DN	TAKEDA_NUP8_HOXA9_16D_DN		107	0.07626859	0.9089945	0.59006214	0.87839025	1.0	2982	tags=50%, list=43%, signal=87%
KNUDSEN_PMNS_UP	KNUDSEN_PMNS_UP		34	0.13267216	0.9086321	0.55935615	0.8773156	1.0	2350	tags=47%, list=34%, signal=71%
PEPTIDE_RECEPTOR_ACTIVITY	PEPTIDE_RECEPTOR_ACTIVITY		15	0.19195652	0.9081101	0.5469388	0.87663674	1.0	5150	tags=93%, list=74%, signal=360%
HDACI_COLON_BUT16HRS_UP	HDACI_COLON_BUT16HRS_UP		20	0.17053731	0.90678537	0.5874263	0.8776653	1.0	5415	tags=95%, list=78%, signal=430%
BRCA1_OVEREXP_PROSTATE_DN	BRCA1_OVEREXP_PROSTATE_DN		35	0.12812273	0.9066408	0.53892213	0.8761304	1.0	4669	tags=80%, list=67%, signal=243%
HSA00230_PURINE_METABOLISM	HSA00230_PURINE_METABOLISM		53	0.10427055	0.9047205	0.5839552	0.87838715	1.0	2949	tags=53%, list=42%, signal=91%
POSITIVE_REGULATION_OF_DEVELOPMENTAL_PROCESS	POSITIVE_REGULATION_OF_DEVELOPMENTAL_PROCESS		81	0.08697019	0.9044817	0.55206287	0.8770495	1.0	3860	tags=64%, list=56%, signal=143%
NUCLEOPLASM_PART	NUCLEOPLASM_PART		99	0.07876725	0.90349716	0.5553279	0.87733847	1.0	5492	tags=87%, list=79%, signal=410%
HSA04910_INSULIN_SIGNALING_PATHWAY	HSA04910_INSULIN_SIGNALING_PATHWAY		64	0.09622093	0.90309876	0.5582822	0.8764386	1.0	4111	tags=69%, list=59%, signal=167%
POSITIVE_REGULATION_OF_CELLULAR_METABOLIC_PROCESS	POSITIVE_REGULATION_OF_CELLULAR_METABOLIC_PROCESS		116	0.072919816	0.9029162	0.5414938	0.87495846	1.0	3452	tags=57%, list=50%, signal=111%
INTRACELLULAR_SIGNALING_CASCADE	INTRACELLULAR_SIGNALING_CASCADE		272	0.04784701	0.8996106	0.56751466	0.8801549	1.0	2922	tags=47%, list=42%, signal=77%
ST_ADRENERGIC	ST_ADRENERGIC		16	0.18778868	0.89944106	0.5883534	0.87862957	1.0	3906	tags=75%, list=56%, signal=171%
IL1RPATHWAY	IL1RPATHWAY		16	0.18822171	0.89917874	0.55151516	0.8773843	1.0	5639	tags=100%, list=81%, signal=531%
BYSTRYKH_HSC_TRANS_GLOCUS	BYSTRYKH_HSC_TRANS_GLOCUS		325	0.043598957	0.8988842	0.5855513	0.87622833	1.0	4646	tags=71%, list=67%, signal=205%
ENZYME_REGULATOR_ACTIVITY	ENZYME_REGULATOR_ACTIVITY		136	0.06563215	0.8984979	0.55186725	0.875276	1.0	5475	tags=85%, list=79%, signal=395%
ASTIER_FN_DIFF	ASTIER_FN_DIFF		17	0.18263572	0.89555335	0.5862745	0.8799142	1.0	4044	tags=76%, list=58%, signal=183%
TGFBETA_ALL_UP	TGFBETA_ALL_UP		39	0.11885478	0.8945546	0.5605469	0.8801764	1.0	5054	tags=85%, list=73%, signal=309%
AGED_RHESUS_UP	AGED_RHESUS_UP		67	0.09680983	0.8934692	0.60474306	0.8807181	1.0	1717	tags=34%, list=25%, signal=45%
CMV_HCMV_TIMECOURSE_1HR_DN	CMV_HCMV_TIMECOURSE_1HR_DN		15	0.19445808	0.89292395	0.5826923	0.8800213	1.0	2818	tags=60%, list=41%, signal=101%
ANATOMICAL_STRUCTURE_FORMATION	ANATOMICAL_STRUCTURE_FORMATION		24	0.15327558	0.8928677	0.5824847	0.8782933	1.0	5593	tags=96%, list=81%, signal=491%
HSA04920_ADIPOCYTOKINE_SIGNALING_PATHWAY	HSA04920_ADIPOCYTOKINE_SIGNALING_PATHWAY		39	0.120128475	0.89068365	0.57455266	0.88104653	1.0	4333	tags=74%, list=62%, signal=197%
CMV_HCMV_6HRS_DN	CMV_HCMV_6HRS_DN		38	0.12119132	0.8891218	0.5883495	0.8825548	1.0	3365	tags=61%, list=48%, signal=117%
CREB_BRAIN_8WKS_DN	CREB_BRAIN_8WKS_DN		20	0.16554016	0.8885885	0.58914727	0.88179564	1.0	936	tags=30%, list=13%, signal=35%
MEMBRANE_FRACTION	MEMBRANE_FRACTION		128	0.06737822	0.88809586	0.5973742	0.88101405	1.0	3066	tags=51%, list=44%, signal=89%
POSITIVE_REGULATION_OF_I_KAPPAB_KINASE_NF_KAPPAB_CASCADE	POSITIVE_REGULATION_OF_I_KAPPAB_KINASE_NF_KAPPAB_CASCADE		41	0.11796567	0.88792974	0.5738318	0.8795892	1.0	2572	tags=49%, list=37%, signal=77%
DNA_REPLICATION	DNA_REPLICATION		38	0.119453706	0.88653415	0.58429116	0.8809147	1.0	3377	tags=61%, list=49%, signal=117%
SEQUENCE_SPECIFIC_DNA_BINDING	SEQUENCE_SPECIFIC_DNA_BINDING		30	0.13566682	0.88562834	0.58235294	0.8809943	1.0	6005	tags=100%, list=86%, signal=736%
SYSTEM_DEVELOPMENT	SYSTEM_DEVELOPMENT		332	0.042921223	0.8833329	0.5940803	0.88398623	1.0	5718	tags=86%, list=82%, signal=466%
GH_EXOGENOUS_LATE_UP	GH_EXOGENOUS_LATE_UP		27	0.1444964	0.8807708	0.59411764	0.88737035	1.0	1057	tags=30%, list=15%, signal=35%
ZHAN_TONSIL_PCBC	ZHAN_TONSIL_PCBC		18	0.17194471	0.8797493	0.613924	0.88780445	1.0	4209	tags=78%, list=61%, signal=197%
PROTEIN_DNA_COMPLEX_ASSEMBLY	PROTEIN_DNA_COMPLEX_ASSEMBLY		26	0.14413907	0.87951666	0.6240458	0.8864816	1.0	3008	tags=58%, list=43%, signal=101%
OLDWERNER_FIBRO_DN	OLDWERNER_FIBRO_DN		47	0.111081295	0.87912273	0.6052632	0.8855174	1.0	2631	tags=49%, list=38%, signal=78%
CORDERO_KRAS_KD_VS_CONTROL_DN	CORDERO_KRAS_KD_VS_CONTROL_DN		22	0.15359461	0.878592	0.59795916	0.8848725	1.0	3986	tags=73%, list=57%, signal=170%
PROTEIN_IMPORT	PROTEIN_IMPORT		27	0.14539059	0.8783361	0.5764463	0.8836054	1.0	1308	tags=33%, list=19%, signal=41%
ANGIOGENESIS	ANGIOGENESIS		21	0.15874621	0.8781728	0.6215686	0.8822047	1.0	3860	tags=71%, list=56%, signal=160%
SUBSTRATE_SPECIFIC_TRANSMEMBRANE_TRANSPORTER_ACTIVITY	SUBSTRATE_SPECIFIC_TRANSMEMBRANE_TRANSPORTER_ACTIVITY		125	0.06685442	0.8781339	0.6064257	0.8805197	1.0	3154	tags=52%, list=45%, signal=94%
CYTOSKELETON	CYTOSKELETON		150	0.06163874	0.8766759	0.60956174	0.88193303	1.0	6015	tags=93%, list=87%, signal=678%
CELLULAR_MORPHOGENESIS_DURING_DIFFERENTIATION	CELLULAR_MORPHOGENESIS_DURING_DIFFERENTIATION		18	0.17022817	0.8764347	0.6242775	0.880706	1.0	5764	tags=100%, list=83%, signal=587%
UVB_NHEK3_C5	UVB_NHEK3_C5		20	0.16536684	0.8761969	0.5976096	0.8794649	1.0	590	tags=25%, list=8%, signal=27%
HDACI_COLON_SUL24HRS_DN	HDACI_COLON_SUL24HRS_DN		70	0.087285444	0.87501174	0.6298568	0.8802906	1.0	3863	tags=64%, list=56%, signal=143%
ET743_SARCOMA_DN	ET743_SARCOMA_DN		142	0.06254788	0.87343687	0.6032389	0.8818293	1.0	1334	tags=25%, list=19%, signal=31%
AGED_MOUSE_HYPOTH_DN	AGED_MOUSE_HYPOTH_DN		15	0.18623179	0.8733999	0.6016598	0.8801677	1.0	2875	tags=60%, list=41%, signal=102%
KINASE_BINDING	KINASE_BINDING		38	0.11773895	0.87295085	0.5964567	0.87941784	1.0	4668	tags=79%, list=67%, signal=240%
IDX_TSA_UP_CLUSTER4	IDX_TSA_UP_CLUSTER4		15	0.18696302	0.87284136	0.60536397	0.8779296	1.0	2407	tags=53%, list=35%, signal=81%
REGULATION_OF_TRANSPORT	REGULATION_OF_TRANSPORT		24	0.15072258	0.87234986	0.5992439	0.87722754	1.0	3296	tags=63%, list=47%, signal=119%
HSA00510_N_GLYCAN_BIOSYNTHESIS	HSA00510_N_GLYCAN_BIOSYNTHESIS		18	0.17188053	0.8696871	0.6146045	0.88086104	1.0	1509	tags=39%, list=22%, signal=50%
GLYCOPROTEIN_BIOSYNTHETIC_PROCESS	GLYCOPROTEIN_BIOSYNTHETIC_PROCESS		34	0.124823324	0.8670588	0.6188605	0.8847385	1.0	5672	tags=94%, list=82%, signal=511%
NEGATIVE_REGULATION_OF_GROWTH	NEGATIVE_REGULATION_OF_GROWTH		19	0.16809426	0.86642843	0.60240966	0.8843235	1.0	5048	tags=89%, list=73%, signal=327%
LI_FETAL_VS_WT_KIDNEY_UP	LI_FETAL_VS_WT_KIDNEY_UP		92	0.078225344	0.8660611	0.6003976	0.88328856	1.0	1199	tags=25%, list=17%, signal=30%
MRNA_PROCESSING_REACTOME	MRNA_PROCESSING_REACTOME		39	0.114201896	0.8651295	0.6400818	0.88344824	1.0	1169	tags=28%, list=17%, signal=34%
HSC_HSC_FETAL	HSC_HSC_FETAL		98	0.074788176	0.86493856	0.6004016	0.8821204	1.0	5439	tags=86%, list=78%, signal=390%
JISON_SICKLECELL_DIFF	JISON_SICKLECELL_DIFF		118	0.06840494	0.86364883	0.6308594	0.8830103	1.0	3416	tags=56%, list=49%, signal=108%
TPA_RESIST_EARLY_DN	TPA_RESIST_EARLY_DN		38	0.11987286	0.86290663	0.59183675	0.8828175	1.0	4836	tags=82%, list=70%, signal=267%
CROMER_HYPOPHARYNGEAL_MET_VS_NON_DN	CROMER_HYPOPHARYNGEAL_MET_VS_NON_DN		21	0.15629064	0.8583585	0.6269531	0.89023155	1.0	2885	tags=57%, list=42%, signal=97%
AXONOGENESIS	AXONOGENESIS		17	0.17020355	0.8546632	0.6163265	0.8959272	1.0	5764	tags=100%, list=83%, signal=587%
ZHAN_MM_CD1_VS_CD2_DN	ZHAN_MM_CD1_VS_CD2_DN		27	0.13926505	0.85431737	0.65	0.8949894	1.0	836	tags=26%, list=12%, signal=29%
PHOSPHATIDYLINOSITOL_SIGNALING_SYSTEM	PHOSPHATIDYLINOSITOL_SIGNALING_SYSTEM		39	0.11439128	0.8540779	0.62330097	0.89370215	1.0	2236	tags=44%, list=32%, signal=64%
TRANSMEMBRANE_RECEPTOR_PROTEIN_TYROSINE_KINASE_ACTIVITY	TRANSMEMBRANE_RECEPTOR_PROTEIN_TYROSINE_KINASE_ACTIVITY		17	0.1730993	0.85391086	0.61491936	0.89234394	1.0	4927	tags=88%, list=71%, signal=303%
CARBOXYLIC_ACID_METABOLIC_PROCESS	CARBOXYLIC_ACID_METABOLIC_PROCESS		62	0.090961926	0.85166705	0.6473029	0.8952559	1.0	2733	tags=48%, list=39%, signal=79%
CELLULAR_LIPID_METABOLIC_PROCESS	CELLULAR_LIPID_METABOLIC_PROCESS		82	0.081100546	0.8466821	0.6147541	0.90378	1.0	3846	tags=63%, list=55%, signal=140%
KNUDSEN_PMNS_DN	KNUDSEN_PMNS_DN		102	0.072656825	0.8444308	0.64187866	0.9066049	1.0	4812	tags=76%, list=69%, signal=245%
RADAEVA_IFNA_UP	RADAEVA_IFNA_UP		15	0.18004523	0.8438423	0.64634144	0.9060634	1.0	1992	tags=47%, list=29%, signal=65%
REGULATION_OF_CELL_CYCLE	REGULATION_OF_CELL_CYCLE		77	0.08124495	0.8423182	0.67469877	0.90742964	1.0	3860	tags=64%, list=56%, signal=142%
TPA_SENS_MIDDLE_DN	TPA_SENS_MIDDLE_DN		119	0.06622714	0.839579	0.69292927	0.911206	1.0	5499	tags=86%, list=79%, signal=405%
ORGANIC_ACID_METABOLIC_PROCESS	ORGANIC_ACID_METABOLIC_PROCESS		62	0.090961926	0.8386609	0.668	0.91130537	1.0	2733	tags=48%, list=39%, signal=79%
TPA_RESIST_LATE_DN	TPA_RESIST_LATE_DN		29	0.12979776	0.8380138	0.6785714	0.9109407	1.0	5806	tags=97%, list=84%, signal=587%
LINDSTEDT_DEND_DN	LINDSTEDT_DEND_DN		30	0.12673806	0.83652174	0.69325155	0.9122	1.0	4215	tags=73%, list=61%, signal=186%
HUMAN_MITODB_6_2002	HUMAN_MITODB_6_2002		110	0.068874836	0.8363305	0.68937874	0.91087615	1.0	4831	tags=76%, list=70%, signal=247%
HIVNEFPATHWAY	HIVNEFPATHWAY		30	0.12982357	0.8363146	0.6467066	0.9092025	1.0	1879	tags=40%, list=27%, signal=55%
ZHAN_MULTIPLE_MYELOMA_VS_NORMAL_DN	ZHAN_MULTIPLE_MYELOMA_VS_NORMAL_DN		19	0.15961999	0.83368343	0.654321	0.91260344	1.0	721	tags=26%, list=10%, signal=29%
SANSOM_APC_5_DN	SANSOM_APC_5_DN		98	0.07334834	0.83133477	0.6633267	0.9154992	1.0	3890	tags=63%, list=56%, signal=142%
REGULATION_OF_TRANSCRIPTION_FACTOR_ACTIVITY	REGULATION_OF_TRANSCRIPTION_FACTOR_ACTIVITY		18	0.16385923	0.8299926	0.66463417	0.9165027	1.0	4265	tags=78%, list=61%, signal=201%
WERNERONLY_FIBRO_UP	WERNERONLY_FIBRO_UP		18	0.16414799	0.8297076	0.69	0.91534483	1.0	791	tags=28%, list=11%, signal=31%
IRS1_KO_ADIP_UP	IRS1_KO_ADIP_UP		40	0.1118772	0.8271008	0.6713427	0.91856337	1.0	5129	tags=85%, list=74%, signal=323%
BRCA1_MES_UP	BRCA1_MES_UP		22	0.14357385	0.82631475	0.6820809	0.91833717	1.0	899	tags=27%, list=13%, signal=31%
YANG_OSTECLASTS_SIG	YANG_OSTECLASTS_SIG		16	0.17133372	0.8253661	0.67913383	0.91851604	1.0	2718	tags=56%, list=39%, signal=92%
INTERPHASE	INTERPHASE		36	0.11649938	0.82405037	0.6760563	0.9194259	1.0	4788	tags=81%, list=69%, signal=258%
CELLULAR_LOCALIZATION	CELLULAR_LOCALIZATION		150	0.058479067	0.8232003	0.71179885	0.91933626	1.0	2333	tags=39%, list=34%, signal=58%
PURINE_METABOLISM	PURINE_METABOLISM		40	0.112485535	0.82210505	0.68367344	0.9197066	1.0	2868	tags=52%, list=41%, signal=89%
GH_EXOGENOUS_ALL_UP	GH_EXOGENOUS_ALL_UP		19	0.15397303	0.82162285	0.7030303	0.9189218	1.0	2222	tags=47%, list=32%, signal=69%
HSA04350_TGF_BETA_SIGNALING_PATHWAY	HSA04350_TGF_BETA_SIGNALING_PATHWAY		56	0.092915274	0.82152134	0.68495935	0.91741717	1.0	5683	tags=91%, list=82%, signal=497%
BRCA_BRCA1_NEG	BRCA_BRCA1_NEG		69	0.08517948	0.8197654	0.66267467	0.91912055	1.0	4244	tags=70%, list=61%, signal=177%
UV_UNIQUE_FIBRO_DN	UV_UNIQUE_FIBRO_DN		15	0.17510946	0.8175775	0.66534656	0.92173	1.0	3415	tags=67%, list=49%, signal=131%
PROTEIN_AUTOPROCESSING	PROTEIN_AUTOPROCESSING		15	0.17777458	0.8165423	0.6784314	0.9220398	1.0	156	tags=20%, list=2%, signal=20%
GERY_CEBP_TARGETS	GERY_CEBP_TARGETS		35	0.11396729	0.816425	0.6822612	0.92057216	1.0	2386	tags=46%, list=34%, signal=69%
REGULATION_OF_BIOLOGICAL_QUALITY	REGULATION_OF_BIOLOGICAL_QUALITY		165	0.053976845	0.8163721	0.68210524	0.9189849	1.0	4052	tags=64%, list=58%, signal=149%
UVB_NHEK2_DN	UVB_NHEK2_DN		40	0.112022035	0.8152799	0.6891892	0.9193599	1.0	3392	tags=60%, list=49%, signal=117%
PROTEIN_MODIFICATION_PROCESS	PROTEIN_MODIFICATION_PROCESS		288	0.042417865	0.81039697	0.6883365	0.92721546	1.0	440	tags=10%, list=6%, signal=11%
METPATHWAY	METPATHWAY		18	0.15999296	0.80951554	0.6780952	0.9271417	1.0	3906	tags=72%, list=56%, signal=165%
TRANSCRIPTION_COACTIVATOR_ACTIVITY	TRANSCRIPTION_COACTIVATOR_ACTIVITY		57	0.091553114	0.80829984	0.7095436	0.9278081	1.0	5947	tags=95%, list=86%, signal=654%
CMV_UV-CMV_COMMON_HCMV_6HRS_DN	CMV_UV-CMV_COMMON_HCMV_6HRS_DN		20	0.15069327	0.8079668	0.7361377	0.9267484	1.0	3122	tags=60%, list=45%, signal=109%
ZHANG_EFT_EWSFLI1_UP	ZHANG_EFT_EWSFLI1_UP		33	0.11754207	0.80644584	0.7065637	0.92801607	1.0	3816	tags=67%, list=55%, signal=147%
HSA04150_MTOR_SIGNALING_PATHWAY	HSA04150_MTOR_SIGNALING_PATHWAY		22	0.14521554	0.8061933	0.6987061	0.92681605	1.0	4044	tags=73%, list=58%, signal=174%
HSA00564_GLYCEROPHOSPHOLIPID_METABOLISM	HSA00564_GLYCEROPHOSPHOLIPID_METABOLISM		28	0.12883171	0.8040887	0.71694213	0.9291655	1.0	3572	tags=64%, list=51%, signal=132%
CONDENSED_CHROMOSOME	CONDENSED_CHROMOSOME		15	0.16736422	0.8032183	0.7294118	0.9290786	1.0	1154	tags=33%, list=17%, signal=40%
ST_GA13_PATHWAY	ST_GA13_PATHWAY		15	0.1731563	0.80200386	0.7071291	0.929703	1.0	188	tags=20%, list=3%, signal=21%
HUMAN_TISSUE_TESTIS	HUMAN_TISSUE_TESTIS		16	0.16483834	0.7990585	0.726	0.93337923	1.0	2763	tags=56%, list=40%, signal=93%
ELECTRON_TRANSPORT_CHAIN	ELECTRON_TRANSPORT_CHAIN		15	0.17016406	0.7987061	0.70987654	0.93231386	1.0	5301	tags=93%, list=76%, signal=394%
RECEPTOR_SIGNALING_PROTEIN_ACTIVITY	RECEPTOR_SIGNALING_PROTEIN_ACTIVITY		37	0.1108746	0.7974502	0.7253385	0.93299276	1.0	2236	tags=43%, list=32%, signal=63%
MYELOID_CELL_DIFFERENTIATION	MYELOID_CELL_DIFFERENTIATION		15	0.17112619	0.79711115	0.71020406	0.931965	1.0	665	tags=27%, list=10%, signal=29%
AGED_MOUSE_NEOCORTEX_DN	AGED_MOUSE_NEOCORTEX_DN		17	0.16243345	0.79652935	0.7175258	0.93134844	1.0	3367	tags=65%, list=48%, signal=125%
ORGAN_DEVELOPMENT	ORGAN_DEVELOPMENT		220	0.046052128	0.7964163	0.71929824	0.9299132	1.0	5718	tags=87%, list=82%, signal=476%
HSA04012_ERBB_SIGNALING_PATHWAY	HSA04012_ERBB_SIGNALING_PATHWAY		47	0.10045688	0.78993934	0.6987952	0.94012105	1.0	3443	tags=60%, list=50%, signal=117%
REN_E2F1_TARGETS	REN_E2F1_TARGETS		17	0.15253186	0.7845863	0.74835885	0.9480049	1.0	4661	tags=82%, list=67%, signal=250%
RNA_SPLICING__VIA_TRANSESTERIFICATION_REACTIONS	RNA_SPLICING__VIA_TRANSESTERIFICATION_REACTIONS		18	0.1531909	0.7823157	0.73069304	0.9504489	1.0	2410	tags=50%, list=35%, signal=76%
REGULATION_OF_PHOSPHORYLATION	REGULATION_OF_PHOSPHORYLATION		22	0.13954192	0.7807292	0.7560484	0.95160836	1.0	3452	tags=64%, list=50%, signal=126%
CARIES_PULP_UP	CARIES_PULP_UP		75	0.07662061	0.7806707	0.7417355	0.9500542	1.0	5676	tags=89%, list=82%, signal=484%
BHATTACHARYA_ESC_UP	BHATTACHARYA_ESC_UP		26	0.1259257	0.7799769	0.7443763	0.9495358	1.0	3134	tags=58%, list=45%, signal=105%
NEGATIVE_REGULATION_OF_BIOLOGICAL_PROCESS	NEGATIVE_REGULATION_OF_BIOLOGICAL_PROCESS		290	0.04026512	0.77994514	0.7366255	0.9479349	1.0	1934	tags=32%, list=28%, signal=42%
PROTEIN_SERINE_THREONINE_KINASE_ACTIVITY	PROTEIN_SERINE_THREONINE_KINASE_ACTIVITY		99	0.066415824	0.7794497	0.73293173	0.9471276	1.0	4314	tags=69%, list=62%, signal=179%
PATTERN_SPECIFICATION_PROCESS	PATTERN_SPECIFICATION_PROCESS		17	0.15451898	0.7788391	0.7473904	0.946504	1.0	971	tags=29%, list=14%, signal=34%
FERNANDEZ_MYC_TARGETS	FERNANDEZ_MYC_TARGETS		67	0.08178462	0.77736706	0.7541322	0.947518	1.0	5966	tags=94%, list=86%, signal=661%
HSC_LTHSC_ADULT	HSC_LTHSC_ADULT		169	0.05060024	0.77648205	0.7647059	0.9474216	1.0	1423	tags=25%, list=20%, signal=31%
REGULATION_OF_MAP_KINASE_ACTIVITY	REGULATION_OF_MAP_KINASE_ACTIVITY		28	0.12131292	0.7759133	0.7217742	0.9467282	1.0	4616	tags=79%, list=66%, signal=233%
PROLIFERATION_GENES	PROLIFERATION_GENES		147	0.055325508	0.77463424	0.742915	0.9474057	1.0	3402	tags=54%, list=49%, signal=104%
SIG_CHEMOTAXIS	SIG_CHEMOTAXIS		24	0.1302505	0.77455586	0.7326923	0.9458996	1.0	1123	tags=29%, list=16%, signal=35%
HALMOS_CEBP_UP	HALMOS_CEBP_UP		19	0.14472355	0.7740936	0.74563104	0.9450743	1.0	3017	tags=58%, list=43%, signal=102%
BIOPOLYMER_MODIFICATION	BIOPOLYMER_MODIFICATION		297	0.039177693	0.7736993	0.75803405	0.94413435	1.0	440	tags=10%, list=6%, signal=10%
ST_DICTYOSTELIUM_DISCOIDEUM_CAMP_CHEMOTAXIS_PATHWAY	ST_DICTYOSTELIUM_DISCOIDEUM_CAMP_CHEMOTAXIS_PATHWAY		17	0.15729584	0.77323484	0.7479839	0.94333327	1.0	4628	tags=82%, list=67%, signal=246%
CYTOPLASMIC_VESICLE	CYTOPLASMIC_VESICLE		54	0.089566216	0.77209026	0.74552685	0.94374603	1.0	4397	tags=72%, list=63%, signal=195%
CELLULAR_PROTEIN_METABOLIC_PROCESS	CELLULAR_PROTEIN_METABOLIC_PROCESS		445	0.032574072	0.77190405	0.7514563	0.9424575	1.0	4297	tags=65%, list=62%, signal=159%
TRANSPORT	TRANSPORT		303	0.037450157	0.7712819	0.7581967	0.94197506	1.0	3165	tags=49%, list=46%, signal=86%
POD1_KO_DN	POD1_KO_DN		463	0.03202216	0.76995564	0.7636719	0.94267386	1.0	3016	tags=46%, list=43%, signal=77%
MULTICELLULAR_ORGANISMAL_DEVELOPMENT	MULTICELLULAR_ORGANISMAL_DEVELOPMENT		408	0.034103744	0.76956236	0.7589641	0.94174546	1.0	5767	tags=86%, list=83%, signal=479%
HDACI_COLON_BUT30MIN_DN	HDACI_COLON_BUT30MIN_DN		21	0.13616449	0.7691765	0.74766356	0.9407973	1.0	379	tags=19%, list=5%, signal=20%
IDENTICAL_PROTEIN_BINDING	IDENTICAL_PROTEIN_BINDING		119	0.061279915	0.7674025	0.78215766	0.9423419	1.0	3257	tags=53%, list=47%, signal=98%
HSC_HSCANDPROGENITORS_ADULT	HSC_HSCANDPROGENITORS_ADULT		272	0.041384537	0.7668135	0.7559055	0.941725	1.0	1127	tags=20%, list=16%, signal=23%
GTPASE_ACTIVITY	GTPASE_ACTIVITY		47	0.09621514	0.76597905	0.7525355	0.94155586	1.0	3620	tags=62%, list=52%, signal=128%
PENG_RAPAMYCIN_DN	PENG_RAPAMYCIN_DN		65	0.08047011	0.76490265	0.7797619	0.94171125	1.0	4146	tags=68%, list=60%, signal=166%
NUCLEOTIDE_BINDING	NUCLEOTIDE_BINDING		98	0.06635783	0.7642973	0.76039606	0.94114983	1.0	891	tags=19%, list=13%, signal=22%
HEMATOPOESIS_RELATED_TRANSCRIPTION_FACTORS	HEMATOPOESIS_RELATED_TRANSCRIPTION_FACTORS		47	0.09470661	0.76367056	0.75	0.9406501	1.0	971	tags=23%, list=14%, signal=27%
NUCLEAR_ENVELOPE_ENDOPLASMIC_RETICULUM_NETWORK	NUCLEAR_ENVELOPE_ENDOPLASMIC_RETICULUM_NETWORK		39	0.10382666	0.7629237	0.7647059	0.94031674	1.0	2487	tags=46%, list=36%, signal=72%
CALRES_MOUSE_NEOCORTEX_DN	CALRES_MOUSE_NEOCORTEX_DN		26	0.12789384	0.7592211	0.78252035	0.9449129	1.0	5257	tags=88%, list=76%, signal=363%
BRCA_PROGNOSIS_POS	BRCA_PROGNOSIS_POS		16	0.15531178	0.75726706	0.779798	0.94653636	1.0	4131	tags=75%, list=59%, signal=185%
HDACI_COLON_BUT16HRS_DN	HDACI_COLON_BUT16HRS_DN		48	0.09242074	0.75655794	0.77096117	0.9460624	1.0	953	tags=23%, list=14%, signal=26%
VESICLE	VESICLE		57	0.08665703	0.75654984	0.7639485	0.9445	1.0	4397	tags=72%, list=63%, signal=194%
AMINO_ACID_METABOLIC_PROCESS	AMINO_ACID_METABOLIC_PROCESS		24	0.1310212	0.7564715	0.7792969	0.94306695	1.0	1407	tags=33%, list=20%, signal=42%
VOLTAGE_GATED_CATION_CHANNEL_ACTIVITY	VOLTAGE_GATED_CATION_CHANNEL_ACTIVITY		29	0.119834416	0.7560974	0.75697213	0.94212365	1.0	5396	tags=90%, list=78%, signal=400%
VESICLE_MEDIATED_TRANSPORT	VESICLE_MEDIATED_TRANSPORT		82	0.07148236	0.75484264	0.7866109	0.94263965	1.0	3912	tags=63%, list=56%, signal=144%
REGULATION_OF_CYCLIN_DEPENDENT_PROTEIN_KINASE_ACTIVITY	REGULATION_OF_CYCLIN_DEPENDENT_PROTEIN_KINASE_ACTIVITY		20	0.1415656	0.7537549	0.770428	0.94271594	1.0	4574	tags=80%, list=66%, signal=234%
ORGANELLE_INNER_MEMBRANE	ORGANELLE_INNER_MEMBRANE		19	0.14671482	0.75368583	0.7913223	0.9412843	1.0	5927	tags=100%, list=85%, signal=681%
SHEPARD_BMYB_MORPHOLINO_UP	SHEPARD_BMYB_MORPHOLINO_UP		59	0.083106264	0.75233555	0.7675781	0.9419302	1.0	4370	tags=71%, list=63%, signal=190%
IL2RBPATHWAY	IL2RBPATHWAY		16	0.15098153	0.750492	0.7907445	0.9433943	1.0	1557	tags=38%, list=22%, signal=48%
HSA00310_LYSINE_DEGRADATION	HSA00310_LYSINE_DEGRADATION		16	0.15704389	0.74968314	0.77281946	0.9431835	1.0	3685	tags=69%, list=53%, signal=146%
PHOSPHORYLATION	PHOSPHORYLATION		144	0.053578462	0.74792415	0.7909836	0.94436955	1.0	4264	tags=67%, list=61%, signal=169%
SUBSTRATE_SPECIFIC_TRANSPORTER_ACTIVITY	SUBSTRATE_SPECIFIC_TRANSPORTER_ACTIVITY		138	0.053969882	0.7476396	0.77864075	0.9433142	1.0	3154	tags=51%, list=45%, signal=91%
STEMCELL_COMMON_DN	STEMCELL_COMMON_DN		20	0.14035243	0.74710286	0.8007968	0.9426254	1.0	3888	tags=70%, list=56%, signal=159%
MRNA_METABOLIC_PROCESS	MRNA_METABOLIC_PROCESS		43	0.09743448	0.74540526	0.7656904	0.943664	1.0	780	tags=21%, list=11%, signal=23%
O6BG_RESIST_MEDULLOBLASTOMA_DN	O6BG_RESIST_MEDULLOBLASTOMA_DN		29	0.115231745	0.744981	0.7968442	0.9428255	1.0	2315	tags=45%, list=33%, signal=67%
IRS1_KO_ADIP_DN	IRS1_KO_ADIP_DN		56	0.08362374	0.7424445	0.7907869	0.9450846	1.0	4259	tags=70%, list=61%, signal=179%
YAGI_AML_PROG_ASSOC	YAGI_AML_PROG_ASSOC		59	0.08053864	0.7416205	0.81889766	0.9447948	1.0	1563	tags=31%, list=23%, signal=39%
VERNELL_PRB_CLSTR1	VERNELL_PRB_CLSTR1		31	0.11427744	0.73898524	0.77310926	0.94739926	1.0	553	tags=19%, list=8%, signal=21%
UVC_HIGH_D9_DN	UVC_HIGH_D9_DN		15	0.15779094	0.73595023	0.8055556	0.9504687	1.0	3535	tags=67%, list=51%, signal=136%
UVC_TTD-XPCS_COMMON_DN	UVC_TTD-XPCS_COMMON_DN		94	0.06474608	0.73581547	0.81017613	0.9491178	1.0	2732	tags=46%, list=39%, signal=74%
GH_GHRHR_KO_6HRS_DN	GH_GHRHR_KO_6HRS_DN		18	0.14375784	0.7357489	0.78571427	0.9476711	1.0	1318	tags=33%, list=19%, signal=41%
CATION_CHANNEL_ACTIVITY	CATION_CHANNEL_ACTIVITY		37	0.104750775	0.7331149	0.80042917	0.9502758	1.0	3029	tags=54%, list=44%, signal=95%
REGULATION_OF_PROTEIN_MODIFICATION_PROCESS	REGULATION_OF_PROTEIN_MODIFICATION_PROCESS		19	0.13745773	0.7303341	0.8146718	0.9529368	1.0	509	tags=21%, list=7%, signal=23%
RIBONUCLEOPROTEIN_COMPLEX_BIOGENESIS_AND_ASSEMBLY	RIBONUCLEOPROTEIN_COMPLEX_BIOGENESIS_AND_ASSEMBLY		40	0.09553883	0.7270178	0.816	0.95638525	1.0	2117	tags=40%, list=30%, signal=57%
MITOCHONDRIA	MITOCHONDRIA		110	0.05954183	0.7265219	0.81609195	0.9556381	1.0	4011	tags=64%, list=58%, signal=148%
POST_TRANSLATIONAL_PROTEIN_MODIFICATION	POST_TRANSLATIONAL_PROTEIN_MODIFICATION		221	0.04189778	0.7240447	0.8045977	0.9578608	1.0	440	tags=10%, list=6%, signal=11%
FLECHNER_KIDNEY_TRANSPLANT_WELL_PBL_DN	FLECHNER_KIDNEY_TRANSPLANT_WELL_PBL_DN		20	0.13376664	0.7227635	0.8229572	0.9582665	1.0	4628	tags=80%, list=67%, signal=239%
IDX_TSA_UP_CLUSTER5	IDX_TSA_UP_CLUSTER5		39	0.09408641	0.7221652	0.84812623	0.95761776	1.0	1664	tags=33%, list=24%, signal=44%
CELLULAR_MACROMOLECULE_METABOLIC_PROCESS	CELLULAR_MACROMOLECULE_METABOLIC_PROCESS		451	0.030477978	0.72086394	0.827451	0.95804095	1.0	4297	tags=65%, list=62%, signal=159%
HYPOXIA_NORMAL_UP	HYPOXIA_NORMAL_UP		94	0.0637832	0.7204905	0.82542694	0.9570552	1.0	1926	tags=34%, list=28%, signal=46%
LE_MYELIN_UP	LE_MYELIN_UP		42	0.094030716	0.71995384	0.8114754	0.9563073	1.0	1334	tags=29%, list=19%, signal=35%
I_KAPPAB_KINASE_NF_KAPPAB_CASCADE	I_KAPPAB_KINASE_NF_KAPPAB_CASCADE		53	0.08292742	0.7187904	0.81362724	0.956509	1.0	2572	tags=45%, list=37%, signal=71%
SHEPARD_BMYB_MORPHOLINO_DN	SHEPARD_BMYB_MORPHOLINO_DN		64	0.075654075	0.7181699	0.8087318	0.9558652	1.0	3927	tags=64%, list=57%, signal=146%
GLYCEROPHOSPHOLIPID_METABOLISM	GLYCEROPHOSPHOLIPID_METABOLISM		15	0.15490451	0.7153335	0.809901	0.95845276	1.0	3555	tags=67%, list=51%, signal=136%
HOFMANN_MANTEL_LYMPHOMA_VS_LYMPH_NODES_DN	HOFMANN_MANTEL_LYMPHOMA_VS_LYMPH_NODES_DN		15	0.15301873	0.714332	0.8170974	0.95836014	1.0	4031	tags=73%, list=58%, signal=174%
HDACI_COLON_BUT12HRS_DN	HDACI_COLON_BUT12HRS_DN		33	0.103949346	0.7131271	0.8277228	0.9585853	1.0	964	tags=24%, list=14%, signal=28%
CREBPATHWAY	CREBPATHWAY		17	0.14383614	0.710145	0.84942085	0.9614152	1.0	1045	tags=29%, list=15%, signal=35%
RNA_SPLICING	RNA_SPLICING		38	0.09761153	0.7099765	0.8086785	0.9601525	1.0	1335	tags=29%, list=19%, signal=36%
CORDERO_KRAS_KD_VS_CONTROL_UP	CORDERO_KRAS_KD_VS_CONTROL_UP		35	0.10111449	0.7098877	0.84660196	0.95877576	1.0	5054	tags=83%, list=73%, signal=303%
ELECTRON_TRANSPORT	ELECTRON_TRANSPORT		28	0.11292656	0.7064904	0.8370672	0.96212786	1.0	2690	tags=50%, list=39%, signal=81%
FMLPPATHWAY	FMLPPATHWAY		19	0.13598329	0.7039352	0.8309859	0.9641416	1.0	3443	tags=63%, list=50%, signal=125%
ET743_HELA_UP	ET743_HELA_UP		21	0.13149406	0.7025249	0.8470825	0.9645305	1.0	4710	tags=81%, list=68%, signal=251%
PURINE_RIBONUCLEOTIDE_BINDING	PURINE_RIBONUCLEOTIDE_BINDING		92	0.06305366	0.69991034	0.8414634	0.96653384	1.0	4624	tags=73%, list=67%, signal=215%
INTEGRINPATHWAY	INTEGRINPATHWAY		19	0.13359682	0.6972186	0.84325397	0.9686908	1.0	3825	tags=68%, list=55%, signal=152%
ADIPOGENESIS_HMSC_CLASS8_DN	ADIPOGENESIS_HMSC_CLASS8_DN		18	0.1380948	0.6960712	0.8378906	0.968712	1.0	1743	tags=39%, list=25%, signal=52%
PRMT5_KD_UP	PRMT5_KD_UP		89	0.062627956	0.69584835	0.8442105	0.96752685	1.0	662	tags=16%, list=10%, signal=17%
BASEMENT_MEMBRANE	BASEMENT_MEMBRANE		21	0.124945834	0.69370186	0.8510204	0.96894413	1.0	1118	tags=29%, list=16%, signal=34%
NERVOUS_SYSTEM_DEVELOPMENT	NERVOUS_SYSTEM_DEVELOPMENT		154	0.048306312	0.6914356	0.8562874	0.9704468	1.0	5623	tags=86%, list=81%, signal=441%
NFATPATHWAY	NFATPATHWAY		25	0.11778004	0.690038	0.85773194	0.97077096	1.0	3906	tags=68%, list=56%, signal=155%
GH_EXOGENOUS_ANY_UP	GH_EXOGENOUS_ANY_UP		88	0.064363	0.6892997	0.88188976	0.9702567	1.0	1057	tags=22%, list=15%, signal=25%
ELECTRON_TRANSPORTER_ACTIVITY	ELECTRON_TRANSPORTER_ACTIVITY		34	0.100851275	0.68889505	0.8496094	0.969257	1.0	936	tags=24%, list=13%, signal=27%
HSC_HSC_SHARED	HSC_HSC_SHARED		89	0.061080668	0.68761545	0.8769841	0.96944803	1.0	5510	tags=85%, list=79%, signal=408%
RECEPTOR_ACTIVITY	RECEPTOR_ACTIVITY		221	0.040097382	0.68644	0.8498943	0.9694429	1.0	295	tags=8%, list=4%, signal=8%
CMV_HCMV_TIMECOURSE_ALL_DN	CMV_HCMV_TIMECOURSE_ALL_DN		198	0.043508004	0.68547183	0.8808511	0.9692141	1.0	2932	tags=46%, list=42%, signal=78%
GOLGI_APPARATUS	GOLGI_APPARATUS		108	0.056173194	0.6837353	0.8769231	0.96991795	1.0	4823	tags=75%, list=69%, signal=242%
ST_B_CELL_ANTIGEN_RECEPTOR	ST_B_CELL_ANTIGEN_RECEPTOR		16	0.14159931	0.683476	0.8687873	0.9687752	1.0	4660	tags=81%, list=67%, signal=246%
GPCRPATHWAY	GPCRPATHWAY		21	0.12345323	0.68342096	0.858	0.9673892	1.0	3443	tags=62%, list=50%, signal=122%
ATP_BINDING	ATP_BINDING		70	0.07043936	0.6826459	0.8707071	0.9668756	1.0	4574	tags=73%, list=66%, signal=211%
PARK_MSCS_BOTH	PARK_MSCS_BOTH		15	0.14504258	0.6797079	0.86259544	0.9691401	1.0	5938	tags=100%, list=86%, signal=689%
HSA00340_HISTIDINE_METABOLISM	HSA00340_HISTIDINE_METABOLISM		16	0.13726906	0.677124	0.88973385	0.97089577	1.0	5992	tags=100%, list=86%, signal=728%
TRANSMEMBRANE_RECEPTOR_PROTEIN_KINASE_ACTIVITY	TRANSMEMBRANE_RECEPTOR_PROTEIN_KINASE_ACTIVITY		24	0.11565513	0.6741313	0.873706	0.97301406	1.0	2960	tags=54%, list=43%, signal=94%
GATED_CHANNEL_ACTIVITY	GATED_CHANNEL_ACTIVITY		44	0.086969756	0.67361975	0.86612576	0.9721855	1.0	5396	tags=86%, list=78%, signal=385%
VERHAAK_AML_NPM1_MUT_VS_WT_UP	VERHAAK_AML_NPM1_MUT_VS_WT_UP		66	0.07073504	0.6723844	0.8952772	0.9721115	1.0	5720	tags=89%, list=82%, signal=502%
MITOTIC_CELL_CYCLE	MITOTIC_CELL_CYCLE		72	0.06701914	0.6715724	0.8757515	0.97164214	1.0	4650	tags=74%, list=67%, signal=221%
PYRIMIDINE_METABOLISM	PYRIMIDINE_METABOLISM		23	0.11648859	0.67141974	0.8712871	0.9703621	1.0	1910	tags=39%, list=28%, signal=54%
PHOSPHOINOSITIDE_MEDIATED_SIGNALING	PHOSPHOINOSITIDE_MEDIATED_SIGNALING		18	0.13292909	0.67109925	0.8793774	0.96930486	1.0	4865	tags=83%, list=70%, signal=278%
DIAB_NEPH_UP	DIAB_NEPH_UP		15	0.14478281	0.6657091	0.86460346	0.9741871	1.0	4551	tags=80%, list=66%, signal=232%
POD1_KO_MOST_DN	POD1_KO_MOST_DN		17	0.1335694	0.66539663	0.88235295	0.9730686	1.0	2750	tags=53%, list=40%, signal=87%
GAMMA-UV_FIBRO_DN	GAMMA-UV_FIBRO_DN		24	0.11425824	0.6597961	0.86965376	0.978057	1.0	5863	tags=96%, list=84%, signal=613%
CELL_ADHESION_MOLECULE_ACTIVITY	CELL_ADHESION_MOLECULE_ACTIVITY		46	0.08178806	0.6590548	0.9057692	0.9773993	1.0	5775	tags=91%, list=83%, signal=539%
MRNA_PROCESSING_GO_0006397	MRNA_PROCESSING_GO_0006397		40	0.088035926	0.657389	0.88095236	0.9777193	1.0	780	tags=20%, list=11%, signal=22%
HSA05131_PATHOGENIC_ESCHERICHIA_COLI_INFECTION_EPEC	HSA05131_PATHOGENIC_ESCHERICHIA_COLI_INFECTION_EPEC		22	0.11583622	0.65605503	0.88438135	0.9777569	1.0	4563	tags=77%, list=66%, signal=225%
ENDOPLASMIC_RETICULUM_PART	ENDOPLASMIC_RETICULUM_PART		38	0.08956361	0.6553073	0.886076	0.9771503	1.0	2487	tags=45%, list=36%, signal=69%
COCAINE_BRAIN_5D_UP	COCAINE_BRAIN_5D_UP		26	0.10665604	0.65499914	0.8997996	0.9759857	1.0	5671	tags=92%, list=82%, signal=502%
IL1_CORNEA_UP	IL1_CORNEA_UP		28	0.10164836	0.6524179	0.9032258	0.97733337	1.0	288	tags=14%, list=4%, signal=15%
SHEPARD_NEG_REG_OF_CELL_PROLIFERATION	SHEPARD_NEG_REG_OF_CELL_PROLIFERATION		49	0.079747215	0.6522069	0.9202335	0.97610843	1.0	1008	tags=22%, list=15%, signal=26%
COFACTOR_METABOLIC_PROCESS	COFACTOR_METABOLIC_PROCESS		19	0.124704555	0.6521171	0.9096154	0.97476465	1.0	4983	tags=84%, list=72%, signal=297%
INOS_ALL_DN	INOS_ALL_DN		21	0.11936059	0.651796	0.9236948	0.9736562	1.0	826	tags=24%, list=12%, signal=27%
HDACI_COLON_SUL_DN	HDACI_COLON_SUL_DN		117	0.052127138	0.6507561	0.9189189	0.9733845	1.0	2670	tags=44%, list=38%, signal=70%
VALINE_LEUCINE_AND_ISOLEUCINE_DEGRADATION	VALINE_LEUCINE_AND_ISOLEUCINE_DEGRADATION		15	0.13918315	0.64674205	0.875	0.9761358	1.0	3201	tags=60%, list=46%, signal=111%
ADENYL_RIBONUCLEOTIDE_BINDING	ADENYL_RIBONUCLEOTIDE_BINDING		76	0.063957945	0.6462727	0.8969697	0.9752075	1.0	4585	tags=72%, list=66%, signal=211%
IDX_TSA_DN_CLUSTER2	IDX_TSA_DN_CLUSTER2		25	0.111993074	0.64553374	0.87077534	0.97451127	1.0	2835	tags=52%, list=41%, signal=88%
GLYCOPROTEIN_METABOLIC_PROCESS	GLYCOPROTEIN_METABOLIC_PROCESS		41	0.08598239	0.64486635	0.90132827	0.97376776	1.0	5672	tags=90%, list=82%, signal=490%
CREB_BRAIN_8WKS_UP	CREB_BRAIN_8WKS_UP		36	0.08807824	0.64351493	0.9247312	0.9736859	1.0	355	tags=14%, list=5%, signal=15%
SUBSTRATE_SPECIFIC_CHANNEL_ACTIVITY	SUBSTRATE_SPECIFIC_CHANNEL_ACTIVITY		49	0.07869054	0.6432348	0.9150743	0.97256804	1.0	3141	tags=53%, list=45%, signal=96%
TAKEDA_NUP8_HOXA9_8D_DN	TAKEDA_NUP8_HOXA9_8D_DN		92	0.05661312	0.6429673	0.91221374	0.9714391	1.0	1649	tags=29%, list=24%, signal=38%
CELL_DEVELOPMENT	CELL_DEVELOPMENT		214	0.03824413	0.63985515	0.9092628	0.9730815	1.0	3603	tags=56%, list=52%, signal=112%
PROTEIN_AMINO_ACID_PHOSPHORYLATION	PROTEIN_AMINO_ACID_PHOSPHORYLATION		130	0.04839358	0.63889384	0.93542075	0.97255015	1.0	2981	tags=48%, list=43%, signal=82%
HSA05130_PATHOGENIC_ESCHERICHIA_COLI_INFECTION_EHEC	HSA05130_PATHOGENIC_ESCHERICHIA_COLI_INFECTION_EHEC		22	0.11583622	0.6386565	0.90836656	0.97134644	1.0	4563	tags=77%, list=66%, signal=225%
BIOSYNTHETIC_PROCESS	BIOSYNTHETIC_PROCESS		167	0.043541968	0.63779724	0.9164927	0.97077614	1.0	3862	tags=60%, list=56%, signal=132%
STEROID_METABOLIC_PROCESS	STEROID_METABOLIC_PROCESS		20	0.12039287	0.6369964	0.8994083	0.97012556	1.0	3679	tags=65%, list=53%, signal=138%
BRCA_ER_NEG	BRCA_ER_NEG		377	0.028767737	0.635111	0.91828793	0.9705091	1.0	1081	tags=18%, list=16%, signal=21%
EMT_UP	EMT_UP		24	0.10958576	0.63349277	0.9314775	0.9706662	1.0	2134	tags=42%, list=31%, signal=60%
HDACI_COLON_TSA48HRS_UP	HDACI_COLON_TSA48HRS_UP		17	0.12713253	0.62612677	0.90836656	0.97616917	1.0	4020	tags=71%, list=58%, signal=167%
VIPPATHWAY	VIPPATHWAY		19	0.1196732	0.6247867	0.91434264	0.9759988	1.0	2825	tags=53%, list=41%, signal=88%
BASSO_REGULATORY_HUBS	BASSO_REGULATORY_HUBS		43	0.07924366	0.62130404	0.9195402	0.9776056	1.0	1390	tags=28%, list=20%, signal=35%
AGED_MOUSE_CORTEX_DN	AGED_MOUSE_CORTEX_DN		24	0.10549137	0.620811	0.9277344	0.97666395	1.0	5345	tags=88%, list=77%, signal=379%
SANA_TNFA_ENDOTHELIAL_UP	SANA_TNFA_ENDOTHELIAL_UP		35	0.08666956	0.6175081	0.94455445	0.97797894	1.0	5749	tags=91%, list=83%, signal=529%
HOHENKIRK_MONOCYTE_DEND_UP	HOHENKIRK_MONOCYTE_DEND_UP		51	0.073493205	0.6078155	0.9306931	0.9846551	1.0	5211	tags=82%, list=75%, signal=328%
CELL_GROWTH_AND_OR_MAINTENANCE	CELL_GROWTH_AND_OR_MAINTENANCE		31	0.09402573	0.6071299	0.9516441	0.9838022	1.0	2261	tags=42%, list=33%, signal=62%
ST_PHOSPHOINOSITIDE_3_KINASE_PATHWAY	ST_PHOSPHOINOSITIDE_3_KINASE_PATHWAY		21	0.10876788	0.60567635	0.938343	0.9835809	1.0	2222	tags=43%, list=32%, signal=63%
ADENYL_NUCLEOTIDE_BINDING	ADENYL_NUCLEOTIDE_BINDING		78	0.058175903	0.6054418	0.94219655	0.98237014	1.0	4585	tags=72%, list=66%, signal=209%
G_PROTEIN_SIGNALING__COUPLED_TO_IP3_SECOND_MESSENGER__PHOSPHOLIPASE_C_ACTIVATING	G_PROTEIN_SIGNALING__COUPLED_TO_IP3_SECOND_MESSENGER__PHOSPHOLIPASE_C_ACTIVATING		17	0.12308189	0.6040989	0.9409449	0.9821541	1.0	4865	tags=82%, list=70%, signal=274%
EGFPATHWAY	EGFPATHWAY		16	0.12514435	0.6022545	0.94787645	0.9821564	1.0	3906	tags=69%, list=56%, signal=157%
ZHAN_MM_CD1_VS_CD2_UP	ZHAN_MM_CD1_VS_CD2_UP		48	0.07472937	0.6021457	0.95137423	0.9808569	1.0	6283	tags=98%, list=90%, signal=1022%
REGULATION_OF_CELL_PROLIFERATION	REGULATION_OF_CELL_PROLIFERATION		124	0.046920788	0.6012176	0.955102	0.980133	1.0	3375	tags=53%, list=49%, signal=102%
HSA04662_B_CELL_RECEPTOR_SIGNALING_PATHWAY	HSA04662_B_CELL_RECEPTOR_SIGNALING_PATHWAY		27	0.09589901	0.59847945	0.95789474	0.9808525	1.0	3965	tags=67%, list=57%, signal=155%
LINDSTEDT_DEND_8H_VS_48H_DN	LINDSTEDT_DEND_8H_VS_48H_DN		25	0.1008932	0.59722203	0.9458333	0.98032886	1.0	1523	tags=32%, list=22%, signal=41%
ION_TRANSMEMBRANE_TRANSPORTER_ACTIVITY	ION_TRANSMEMBRANE_TRANSPORTER_ACTIVITY		101	0.051348247	0.5962662	0.94152045	0.97965854	1.0	3154	tags=50%, list=45%, signal=91%
HSA04360_AXON_GUIDANCE	HSA04360_AXON_GUIDANCE		60	0.06534965	0.59591764	0.9411765	0.97852963	1.0	3947	tags=63%, list=57%, signal=145%
NUCLEOSIDE_TRIPHOSPHATASE_ACTIVITY	NUCLEOSIDE_TRIPHOSPHATASE_ACTIVITY		92	0.052038148	0.5945348	0.9470588	0.9781961	1.0	4624	tags=72%, list=67%, signal=212%
ENDOPLASMIC_RETICULUM_MEMBRANE	ENDOPLASMIC_RETICULUM_MEMBRANE		34	0.08511958	0.5937088	0.9405941	0.97743076	1.0	3904	tags=65%, list=56%, signal=147%
HSA01430_CELL_COMMUNICATION	HSA01430_CELL_COMMUNICATION		37	0.08393366	0.5928138	0.9352941	0.97670096	1.0	733	tags=19%, list=11%, signal=21%
CELLULAR_CARBOHYDRATE_METABOLIC_PROCESS	CELLULAR_CARBOHYDRATE_METABOLIC_PROCESS		41	0.07766506	0.5867465	0.94785845	0.9795085	1.0	1834	tags=34%, list=26%, signal=46%
ESTABLISHMENT_OF_LOCALIZATION	ESTABLISHMENT_OF_LOCALIZATION		326	0.028649298	0.5855532	0.96456695	0.97902465	1.0	3324	tags=51%, list=48%, signal=93%
G1_S_TRANSITION_OF_MITOTIC_CELL_CYCLE	G1_S_TRANSITION_OF_MITOTIC_CELL_CYCLE		16	0.12110277	0.58444095	0.956778	0.9783911	1.0	462	tags=19%, list=7%, signal=20%
CARBOHYDRATE_METABOLIC_PROCESS	CARBOHYDRATE_METABOLIC_PROCESS		62	0.0639349	0.5794567	0.9585062	0.98016095	1.0	6279	tags=97%, list=90%, signal=1002%
PROTEIN_DIMERIZATION_ACTIVITY	PROTEIN_DIMERIZATION_ACTIVITY		79	0.054281984	0.5788589	0.96673596	0.9791439	1.0	3406	tags=54%, list=49%, signal=106%
CANCER_NEOPLASTIC_META_UP	CANCER_NEOPLASTIC_META_UP		21	0.10573451	0.5787628	0.953629	0.977836	1.0	1251	tags=29%, list=18%, signal=35%
NUCLEOBASE__NUCLEOSIDE_AND_NUCLEOTIDE_METABOLIC_PROCESS	NUCLEOBASE__NUCLEOSIDE_AND_NUCLEOTIDE_METABOLIC_PROCESS		23	0.0995647	0.56958926	0.96153843	0.9819524	1.0	5952	tags=96%, list=86%, signal=667%
BRENTANI_CELL_CYCLE	BRENTANI_CELL_CYCLE		35	0.079143144	0.5619297	0.96415097	0.98473716	1.0	2825	tags=49%, list=41%, signal=81%
PENG_LEUCINE_DN	PENG_LEUCINE_DN		54	0.06610227	0.5606672	0.9623016	0.9840512	1.0	5716	tags=89%, list=82%, signal=499%
HDACI_COLON_CUR_UP	HDACI_COLON_CUR_UP		45	0.07048687	0.55262065	0.9818182	0.98661506	1.0	2136	tags=38%, list=31%, signal=54%
MITOCHONDRION	MITOCHONDRION		94	0.048557233	0.551702	0.9633911	0.98570836	1.0	3360	tags=53%, list=48%, signal=102%
HYPOXIA_REG_UP	HYPOXIA_REG_UP		18	0.10410051	0.5408375	0.96862745	0.9893148	1.0	2750	tags=50%, list=40%, signal=83%
RNA_PROCESSING	RNA_PROCESSING		75	0.053506114	0.53852034	0.9902344	0.9888429	1.0	2872	tags=47%, list=41%, signal=79%
CATION_TRANSMEMBRANE_TRANSPORTER_ACTIVITY	CATION_TRANSMEMBRANE_TRANSPORTER_ACTIVITY		79	0.052578237	0.5357337	0.99038464	0.9885477	1.0	3154	tags=51%, list=45%, signal=92%
TRANSMEMBRANE_RECEPTOR_ACTIVITY	TRANSMEMBRANE_RECEPTOR_ACTIVITY		146	0.037654094	0.5314902	0.9830867	0.98883945	1.0	1265	tags=22%, list=18%, signal=26%
NUCLEOTIDE_METABOLIC_PROCESS	NUCLEOTIDE_METABOLIC_PROCESS		21	0.09538256	0.51116383	0.9782609	0.9941571	1.0	5952	tags=95%, list=86%, signal=665%
MOREAUX_TACI_HI_IN_BMPC	MOREAUX_TACI_HI_IN_BMPC		24	0.0877168	0.50630754	0.9862745	0.99416	1.0	5468	tags=88%, list=79%, signal=410%
PDGFPATHWAY	PDGFPATHWAY		15	0.10561409	0.4822791	0.98828125	0.99821347	1.0	656	tags=20%, list=9%, signal=22%
TAVOR_CEBP_UP	TAVOR_CEBP_UP		25	0.07839284	0.46925908	0.9939516	0.99897325	1.0	3623	tags=60%, list=52%, signal=125%
FRASOR_ER_DN	FRASOR_ER_DN		30	0.06970401	0.4607181	0.99792963	0.99867994	1.0	3452	tags=57%, list=50%, signal=112%
ATRIA_UP	ATRIA_UP		68	0.043595772	0.41914108	1.0	1.0	1.0	4703	tags=72%, list=68%, signal=221%
MRNA_SPLICING	MRNA_SPLICING		21	0.0698156	0.38939494	1.0	0.9996885	1.0	5137	tags=81%, list=74%, signal=310%
