# Supplementary material for: Signatures of RNA binding proteins globally coupled to effective microRNA target sites
Source: HighWire-hosted journal article supplement (doi:10.1101/gr.103259.109), 2010-05-27
Supplement: Table_S13.zip [file HDACI_COLON_SUL48HRS_UP.xls]

NAME	PROBE	GENE SYMBOL	GENE_TITLE	RANK IN GENE LIST	RANK METRIC SCORE	RUNNING ES	CORE ENRICHMENT
row_0	CPEB4	null	null	6	3.699057102203369	0.020869313	No
row_1	RBM33	null	null	50	3.699057102203369	0.036374755	No
row_2	IRF2BP2	null	null	191	3.699057102203369	0.037818145	No
row_3	SNAI2	null	null	598	2.744813919067383	6.996378E-4	No
row_4	CMTM4	null	null	617	2.744813919067383	0.019829316	No
row_5	ABCE1	null	null	964	2.2840840816497803	-0.008591019	No
row_6	CDH1	null	null	1017	2.236659049987793	0.0056096953	No
row_7	EIF2C2	null	null	1364	1.9508689641952515	-0.02281064	No
row_8	GFPT1	null	null	1830	1.6778680086135864	-0.068482354	No
row_9	PHKA1	null	null	2050	1.571951985359192	-0.07849155	No
row_10	C9ORF30	null	null	2691	1.3116669654846191	-0.14953294	No
row_11	MYC	null	null	2825	1.2628940343856812	-0.14707476	No
row_12	RPP30	null	null	3090	1.184509038925171	-0.1636076	No
row_13	EIF2S1	null	null	3442	1.086272954940796	-0.19275278	No
row_14	EFTUD1	null	null	3810	0.9797260165214539	-0.22421747	Yes
row_15	C5	null	null	3818	0.9764230251312256	-0.20349313	Yes
row_16	ARRDC3	null	null	3841	0.9707030057907104	-0.18494332	Yes
row_17	ABHD3	null	null	3991	0.9326440095901489	-0.18480466	Yes
row_18	PSMD12	null	null	4007	0.9296799898147583	-0.16524006	Yes
row_19	MKLN1	null	null	4027	0.9230830073356628	-0.14625536	Yes
row_20	PPP2R2A	null	null	4094	0.9045689702033997	-0.13408422	Yes
row_21	SLC11A2	null	null	4149	0.8888239860534668	-0.12017345	Yes
row_22	ANXA5	null	null	4416	0.830411970615387	-0.13699622	Yes
row_23	PCBP1	null	null	4425	0.8280680179595947	-0.11641684	Yes
row_24	C10ORF78	null	null	4592	0.7884320020675659	-0.11874266	Yes
row_25	RHEB	null	null	4624	0.7831299901008606	-0.10149758	Yes
row_26	LARP2	null	null	4842	0.7259290218353271	-0.11121684	Yes
row_27	SLC20A1	null	null	4844	0.7259290218353271	-0.089622684	Yes
row_28	ME1	null	null	4983	0.6917359828948975	-0.08788935	Yes
row_29	IGFBP3	null	null	5054	0.6758040189743042	-0.07629809	Yes
row_30	API5	null	null	5106	0.659246027469635	-0.06195241	Yes
row_31	SPARCL1	null	null	5158	0.6463630199432373	-0.047606725	Yes
row_32	ZSWIM6	null	null	5277	0.6216890215873718	-0.042974003	Yes
row_33	PPP4R2	null	null	5313	0.6144809722900391	-0.026308805	Yes
row_34	ENPP1	null	null	5347	0.6059859991073608	-0.009353669	Yes
row_35	TRIB1	null	null	5543	0.5642420053482056	-0.015883602	Yes
row_36	XPOT	null	null	5592	0.5526189804077148	-0.0011030096	Yes
row_37	PLEKHF2	null	null	5939	0.4732309877872467	-0.029523345	Yes
row_38	CAV2	null	null	5999	0.45701301097869873	-0.016337417	Yes
row_39	XPO1	null	null	6042	0.4481489956378937	-6.870084E-4	Yes
row_40	OSGIN2	null	null	6204	0.40857699513435364	-0.002287976	Yes
row_41	PTPN12	null	null	6250	0.3928459882736206	0.012927525	Yes
row_42	HP1BP3	null	null	6301	0.3784950077533722	0.027418178	Yes
row_43	SCD	null	null	6349	0.36682000756263733	0.04234374	Yes
row_44	STK3	null	null	6459	0.33525699377059937	0.04828119	Yes
row_45	CD55	null	null	6717	0.25205400586128235	0.032763146	Yes
