# Supplementary material for: Signatures of RNA binding proteins globally coupled to effective microRNA target sites
Source: HighWire-hosted journal article supplement (doi:10.1101/gr.103259.109), 2010-05-27
Supplement: Table_S13.zip [file HSA04320_DORSO_VENTRAL_AXIS_FORMATION.xls]

NAME	PROBE	GENE SYMBOL	GENE_TITLE	RANK IN GENE LIST	RANK METRIC SCORE	RUNNING ES	CORE ENRICHMENT
row_0	SPIRE1	null	null	195	3.699057102203369	0.030672815	Yes
row_1	KRAS	null	null	353	3.221935987472534	0.06683141	Yes
row_2	ETS1	null	null	361	3.221935987472534	0.1246444	Yes
row_3	MAPK1	null	null	680	2.619875907897949	0.1375606	Yes
row_4	NOTCH1	null	null	920	2.3373289108276367	0.16188148	Yes
row_5	ERBB4	null	null	1028	2.221935987472534	0.2052582	Yes
row_6	PIWIL4	null	null	1718	1.7400150299072266	0.16461587	Yes
row_7	ETV6	null	null	1788	1.703421950340271	0.21347837	Yes
row_8	ERBB2	null	null	1909	1.634598970413208	0.2549784	Yes
row_9	CPEB1	null	null	2195	1.5003999471664429	0.27265856	Yes
row_10	SOS2	null	null	2222	1.489542007446289	0.32772866	Yes
row_11	EGFR	null	null	2330	1.4462039470672607	0.3711054	Yes
row_12	GRB2	null	null	4376	0.8387190103530884	0.13470733	No
row_13	PIWIL1	null	null	6198	0.41036099195480347	-0.069353506	No
row_14	FMN2	null	null	6341	0.36864298582077026	-0.031029472	No
row_15	SOS1	null	null	6576	0.3004229962825775	-0.005986799	No
row_16	NOTCH2	null	null	6786	0.22077900171279907	0.022664938	No
