# Supplementary material for: Signatures of RNA binding proteins globally coupled to effective microRNA target sites
Source: HighWire-hosted journal article supplement (doi:10.1101/gr.103259.109), 2010-05-27
Supplement: Table_S13.zip [file HSA04340_HEDGEHOG_SIGNALING_PATHWAY.xls]

NAME	PROBE	GENE SYMBOL	GENE_TITLE	RANK IN GENE LIST	RANK METRIC SCORE	RUNNING ES	CORE ENRICHMENT
row_0	GAS1	null	null	59	3.699057102203369	0.031472757	Yes
row_1	BMP8A	null	null	70	3.699057102203369	0.070027456	Yes
row_2	PTCH1	null	null	164	3.699057102203369	0.09658621	Yes
row_3	PRKACA	null	null	193	3.699057102203369	0.13253938	Yes
row_4	BMP6	null	null	755	2.522965908050537	0.091458306	Yes
row_5	SUFU	null	null	850	2.4203031063079834	0.11787253	Yes
row_6	FBXW11	null	null	875	2.376837968826294	0.15440382	Yes
row_7	GLI3	null	null	1229	2.0556039810180664	0.14338489	Yes
row_8	PRKY	null	null	1651	1.769637942314148	0.12253794	Yes
row_9	BTRC	null	null	1791	1.6990569829940796	0.14244834	Yes
row_10	PRKACG	null	null	2120	1.540693998336792	0.13504264	Yes
row_11	WNT3	null	null	2217	1.492231011390686	0.1611678	Yes
row_12	WNT5A	null	null	2257	1.4711699485778809	0.19553114	Yes
row_13	WNT11	null	null	2332	1.4437839984893799	0.22483596	Yes
row_14	ZIC2	null	null	2476	1.3915610313415527	0.24416824	Yes
row_15	RAB23	null	null	2490	1.3851900100708008	0.28228936	Yes
row_16	CSNK1G1	null	null	2867	1.2488080263137817	0.26794624	Yes
row_17	CSNK1G3	null	null	3011	1.2076950073242188	0.2872785	Yes
row_18	CSNK1A1L	null	null	3079	1.1871730089187622	0.31759503	Yes
row_19	BMP4	null	null	3452	1.082056999206543	0.30383003	No
row_20	CSNK1A1	null	null	4231	0.8716880083084106	0.23138605	No
row_21	HHIP	null	null	4359	0.8423280119895935	0.2530308	No
row_22	PRKACB	null	null	4820	0.7338550090789795	0.2265472	No
row_23	WNT16	null	null	5604	0.5489150285720825	0.15338056	No
row_24	PRKX	null	null	6616	0.287773996591568	0.04726119	No
