# Supplementary material for: Signatures of RNA binding proteins globally coupled to effective microRNA target sites
Source: HighWire-hosted journal article supplement (doi:10.1101/gr.103259.109), 2010-05-27
Supplement: Table_S13.zip [file LEADING_EDGE.xls]

NAME	PROBE	GENE SYMBOL	GENE_TITLE	RANK IN GENE LIST	RANK METRIC SCORE	RUNNING ES	CORE ENRICHMENT
row_0	FGD6	null	null	125	3.699057102203369	0.025417289	Yes
row_1	CCDC88A	null	null	509	2.9209060668945312	0.013556728	Yes
row_2	CDK6	null	null	665	2.6576640605926514	0.034639385	Yes
row_3	BCAR1	null	null	956	2.301116943359375	0.03621619	Yes
row_4	S100A11	null	null	1004	2.251899003982544	0.07290352	Yes
row_5	AMOT	null	null	1619	1.785243034362793	0.027666284	Yes
row_6	CD2AP	null	null	1685	1.754573941230774	0.06175284	Yes
row_7	SCYL3	null	null	1715	1.7400150299072266	0.10104096	Yes
row_8	MYO5A	null	null	1946	1.6162710189819336	0.11128703	Yes
row_9	PDPN	null	null	2166	1.517212986946106	0.12312246	Yes
row_10	MYO6	null	null	2209	1.4949369430541992	0.16053224	Yes
row_11	FGD1	null	null	2263	1.468608021736145	0.19635265	Yes
row_12	CDC42BPB	null	null	2434	1.4090219736099243	0.21526799	Yes
row_13	ABI1	null	null	2441	1.4045909643173218	0.25787932	Yes
row_14	ALS2	null	null	2478	1.3894269466400146	0.29615602	Yes
row_15	MYH9	null	null	2835	1.2597240209579468	0.28819662	Yes
row_16	CTTN	null	null	3067	1.1912009716033936	0.2982982	Yes
row_17	APBB2	null	null	3660	1.0214500427246094	0.2562397	Yes
row_18	ITGB1	null	null	3787	0.9847270250320435	0.2815125	Yes
row_19	ARF6	null	null	4049	0.9173009991645813	0.28727946	Yes
row_20	CDC42BPA	null	null	4083	0.9073659777641296	0.32598963	Yes
row_21	EZR	null	null	4563	0.7948819994926453	0.30025825	No
row_22	ITGB1BP1	null	null	4836	0.7287099957466125	0.30443582	No
