# Supplementary material for: Signatures of RNA binding proteins globally coupled to effective microRNA target sites
Source: HighWire-hosted journal article supplement (doi:10.1101/gr.103259.109), 2010-05-27
Supplement: Table_S13.zip [file LEE_ACOX1_UP.xls]

NAME	PROBE	GENE SYMBOL	GENE_TITLE	RANK IN GENE LIST	RANK METRIC SCORE	RUNNING ES	CORE ENRICHMENT
row_0	COL4A2	null	null	142	3.699057102203369	0.0350531	No
row_1	NDRG1	null	null	1029	2.221935987472534	-0.037315104	No
row_2	HOXC6	null	null	2532	1.3706769943237305	-0.19862352	No
row_3	CSTB	null	null	2558	1.3605999946594238	-0.14667755	No
row_4	PLAT	null	null	4052	0.9165840148925781	-0.30668655	Yes
row_5	ANXA5	null	null	4416	0.830411970615387	-0.3035422	Yes
row_6	HLA-DQA1	null	null	4674	0.7691270112991333	-0.2850932	Yes
row_7	ABHD2	null	null	4809	0.7366880178451538	-0.248885	Yes
row_8	FABP2	null	null	4828	0.7319769859313965	-0.19592835	Yes
row_9	SLC20A1	null	null	4844	0.7259290218353271	-0.14253855	Yes
row_10	GIPC2	null	null	5419	0.5908300280570984	-0.16985911	Yes
row_11	TOX	null	null	5602	0.549530029296875	-0.14058135	Yes
row_12	IGFBP1	null	null	5863	0.490884006023407	-0.1225655	Yes
row_13	CD24	null	null	6269	0.3862450122833252	-0.12548526	Yes
row_14	LPL	null	null	6389	0.35624000430107117	-0.087111324	Yes
row_15	PLSCR1	null	null	6773	0.22542400658130646	-0.086854644	Yes
row_16	SLC16A1	null	null	6779	0.22367599606513977	-0.032021005	Yes
row_17	IMPACT	null	null	6886	0.15672899782657623	0.008229903	Yes
