# Supplementary material for: Signatures of RNA binding proteins globally coupled to effective microRNA target sites
Source: HighWire-hosted journal article supplement (doi:10.1101/gr.103259.109), 2010-05-27
Supplement: Table_S13.zip [file LEUKOCYTE_ACTIVATION.xls]

NAME	PROBE	GENE SYMBOL	GENE_TITLE	RANK IN GENE LIST	RANK METRIC SCORE	RUNNING ES	CORE ENRICHMENT
row_0	LST1	null	null	184	3.699057102203369	0.021040976	No
row_1	SOCS5	null	null	770	2.494936943054199	-0.015840916	No
row_2	SART1	null	null	2374	1.4295439720153809	-0.19976889	No
row_3	CD1D	null	null	2657	1.3206590414047241	-0.19288363	No
row_4	CEBPG	null	null	3197	1.1525139808654785	-0.223121	No
row_5	CD47	null	null	3504	1.06659996509552	-0.21970244	No
row_6	HDAC4	null	null	3823	0.9756010174751282	-0.21801724	No
row_7	LAX1	null	null	4541	0.7997840046882629	-0.273966	No
row_8	CRTAM	null	null	4633	0.7799789905548096	-0.23949155	No
row_9	IL8	null	null	5390	0.5973100066184998	-0.3010737	Yes
row_10	IL12B	null	null	5624	0.5434169769287109	-0.2871106	Yes
row_11	IL12A	null	null	5762	0.5112540125846863	-0.25928065	Yes
row_12	HDAC9	null	null	5870	0.48954200744628906	-0.22711733	Yes
row_13	NCK1	null	null	6107	0.434239000082016	-0.21358755	Yes
row_14	PTPRC	null	null	6115	0.43235498666763306	-0.16697963	Yes
row_15	HELLS	null	null	6138	0.42605599761009216	-0.12253839	Yes
row_16	CLEC7A	null	null	6177	0.41485199332237244	-0.08040829	Yes
row_17	CD24	null	null	6269	0.3862450122833252	-0.045933835	Yes
row_18	TPD52	null	null	6291	0.3809939920902252	-0.0013481525	Yes
row_19	CD28	null	null	6360	0.3652069866657257	0.036448564	Yes
row_20	TLR4	null	null	6734	0.24573899805545807	0.030189237	Yes
