# Supplementary material for: Signatures of RNA binding proteins globally coupled to effective microRNA target sites
Source: HighWire-hosted journal article supplement (doi:10.1101/gr.103259.109), 2010-05-27
Supplement: Table_S13.zip [file LIN_WNT_UP.xls]

NAME	PROBE	GENE SYMBOL	GENE_TITLE	RANK IN GENE LIST	RANK METRIC SCORE	RUNNING ES	CORE ENRICHMENT
row_0	SF3A1	null	null	290	3.398026943206787	0.020640878	Yes
row_1	TCF20	null	null	307	3.398026943206787	0.08083141	Yes
row_2	CTDSPL	null	null	310	3.398026943206787	0.14304273	Yes
row_3	ETS1	null	null	361	3.221935987472534	0.19832563	Yes
row_4	CCND1	null	null	440	3.000087022781372	0.24956697	Yes
row_5	SYK	null	null	721	2.552928924560547	0.27165127	Yes
row_6	HMG20B	null	null	909	2.3373289108276367	0.30715936	Yes
row_7	MTA1	null	null	1125	2.130855083465576	0.33862588	Yes
row_8	CAPN1	null	null	1145	2.1192729473114014	0.39838338	Yes
row_9	GNA12	null	null	1519	1.8417240381240845	0.40704387	Yes
row_10	SCAP	null	null	1559	1.8182430267333984	0.46391454	Yes
row_11	AES	null	null	1937	1.6198760271072388	0.47199768	Yes
row_12	CPSF4	null	null	2081	1.5529290437698364	0.5138568	Yes
row_13	ZBTB7A	null	null	3168	1.1612379550933838	0.41960162	No
row_14	HDGF	null	null	3371	1.1057709455490112	0.45294458	No
row_15	SEC61A1	null	null	3396	1.1002659797668457	0.51198035	No
