# Supplementary material for: Signatures of RNA binding proteins globally coupled to effective microRNA target sites
Source: HighWire-hosted journal article supplement (doi:10.1101/gr.103259.109), 2010-05-27
Supplement: Table_S13.zip [file LINDSTEDT_DEND_UP.xls]

NAME	PROBE	GENE SYMBOL	GENE_TITLE	RANK IN GENE LIST	RANK METRIC SCORE	RUNNING ES	CORE ENRICHMENT
row_0	STK4	null	null	98	3.699057102203369	0.033463337	Yes
row_1	MARCKS	null	null	625	2.699057102203369	0.0051037613	Yes
row_2	NBN	null	null	714	2.585114002227783	0.04001156	Yes
row_3	TNFAIP3	null	null	942	2.3188459873199463	0.054841354	Yes
row_4	NR4A3	null	null	1089	2.154989004135132	0.08137128	Yes
row_5	DUSP4	null	null	1147	2.1192729473114014	0.1207569	Yes
row_6	KLF5	null	null	1300	1.9914870262145996	0.14642015	Yes
row_7	ZNF267	null	null	1764	1.7167860269546509	0.12716068	Yes
row_8	SIAH2	null	null	1798	1.694735050201416	0.17001301	Yes
row_9	NFKB1	null	null	1863	1.6616300344467163	0.20838751	Yes
row_10	PNRC1	null	null	2698	1.3098909854888916	0.13553855	Yes
row_11	ADM	null	null	2750	1.2891240119934082	0.17579085	Yes
row_12	IL15RA	null	null	2754	1.2857569456100464	0.22297657	Yes
row_13	BTG1	null	null	3006	1.209097981452942	0.23433965	Yes
row_14	OPTN	null	null	3016	1.2076950073242188	0.2806587	Yes
row_15	ID2	null	null	3046	1.197998046875	0.3240888	Yes
row_16	REL	null	null	3174	1.1599810123443604	0.3533632	Yes
row_17	USP12	null	null	4241	0.8691099882125854	0.24700275	No
row_18	NFKBIA	null	null	4660	0.7721999883651733	0.23424335	No
row_19	BIRC3	null	null	5642	0.5391889810562134	0.14016083	No
row_20	LAMP3	null	null	6281	0.38392698764801025	0.0956233	No
