# Supplementary material for: Signatures of RNA binding proteins globally coupled to effective microRNA target sites
Source: HighWire-hosted journal article supplement (doi:10.1101/gr.103259.109), 2010-05-27
Supplement: Table_S13.zip [file MOREAUX_TACI_HI_VS_LOW_UP.xls]

NAME	PROBE	GENE SYMBOL	GENE_TITLE	RANK IN GENE LIST	RANK METRIC SCORE	RUNNING ES	CORE ENRICHMENT
row_0	CR1	null	null	84	3.699057102203369	-0.004695782	Yes
row_1	ROD1	null	null	96	3.699057102203369	0.0013232453	Yes
row_2	C1ORF144	null	null	130	3.699057102203369	0.004113152	Yes
row_3	CCR6	null	null	158	3.699057102203369	0.007783728	Yes
row_4	MRC2	null	null	177	3.699057102203369	0.012775308	Yes
row_5	ADARB1	null	null	212	3.398026943206787	0.015418436	Yes
row_6	NEUROD2	null	null	218	3.398026943206787	0.022318134	Yes
row_7	PLXNA1	null	null	228	3.398026943206787	0.028630717	Yes
row_8	B4GALT1	null	null	263	3.398026943206787	0.031273846	Yes
row_9	TCF20	null	null	307	3.398026943206787	0.03259597	Yes
row_10	PKP2	null	null	398	3.096997022628784	0.02701952	Yes
row_11	PBX2	null	null	431	3.096997022628784	0.029956205	Yes
row_12	PTPRS	null	null	511	2.853959083557129	0.025994314	Yes
row_13	APAF1	null	null	626	2.699057102203369	0.016895184	Yes
row_14	MAPK1	null	null	680	2.619875907897949	0.016749527	Yes
row_15	GLP1R	null	null	681	2.619875907897949	0.024383115	Yes
row_16	POFUT2	null	null	718	2.552928924560547	0.026732687	Yes
row_17	KIAA0586	null	null	722	2.552928924560547	0.03392594	Yes
row_18	SOX12	null	null	724	2.552928924560547	0.04141275	Yes
row_19	CDKN1C	null	null	751	2.522965908050537	0.045230106	Yes
row_20	CDC5L	null	null	771	2.494936943054199	0.050074905	Yes
row_21	DRD5	null	null	801	2.4686079025268555	0.053451926	Yes
row_22	GNAQ	null	null	901	2.3566339015960693	0.04655447	Yes
row_23	MTSS1	null	null	993	2.251899003982544	0.04083124	Yes
row_24	FBXO9	null	null	1009	2.236659049987793	0.046263155	Yes
row_25	DMC1	null	null	1047	2.1939070224761963	0.04846595	Yes
row_26	FOXF2	null	null	1094	2.154989004135132	0.04934774	Yes
row_27	MTA1	null	null	1125	2.130855083465576	0.05257798	Yes
row_28	FLRT2	null	null	1192	2.075808048248291	0.050524205	Yes
row_29	LRFN5	null	null	1198	2.075808048248291	0.057423905	Yes
row_30	MOSPD3	null	null	1262	2.02695894241333	0.055810463	Yes
row_31	PIN4	null	null	1379	1.9356290102005005	0.04641778	Yes
row_32	WIPI2	null	null	1461	1.8795130252838135	0.042162333	Yes
row_33	MPP3	null	null	1506	1.8539589643478394	0.043337677	Yes
row_34	KHSRP	null	null	1614	1.7905720472335815	0.035265997	Yes
row_35	NOS1	null	null	1668	1.764557957649231	0.03512034	Yes
row_36	DOK1	null	null	1674	1.7595380544662476	0.042020038	Yes
row_37	CALML4	null	null	1773	1.712285041809082	0.035269357	Yes
row_38	MAP2K3	null	null	1795	1.6990569829940796	0.039820604	Yes
row_39	FURIN	null	null	1857	1.669672966003418	0.038500722	Yes
row_40	MUC3B	null	null	1911	1.634598970413208	0.038355064	Yes
row_41	PHLDA1	null	null	1921	1.627174973487854	0.044667646	Yes
row_42	CALR	null	null	1925	1.627174973487854	0.051860902	Yes
row_43	KIF5A	null	null	2033	1.5752049684524536	0.04378922	Yes
row_44	LRRC15	null	null	2037	1.5752049684524536	0.05098247	Yes
row_45	ADAM11	null	null	2043	1.571951985359192	0.05788217	Yes
row_46	KIAA1217	null	null	2074	1.556041955947876	0.06111241	Yes
row_47	KIR3DX1	null	null	2124	1.537688970565796	0.061553866	Yes
row_48	RNF20	null	null	2215	1.492231011390686	0.055977415	Yes
row_49	C6ORF47	null	null	2249	1.4763400554656982	0.058767322	Yes
row_50	EGFR	null	null	2330	1.4462039470672607	0.05465865	Yes
row_51	MITF	null	null	2367	1.431885004043579	0.057008225	Yes
row_52	RNF121	null	null	2496	1.3830870389938354	0.0458542	Yes
row_53	F7	null	null	2520	1.3727209568023682	0.05011189	Yes
row_54	KLF2	null	null	2537	1.368643045425415	0.055397026	Yes
row_55	SHANK2	null	null	2575	1.3507519960403442	0.05759982	Yes
row_56	PTGES	null	null	2629	1.3317010402679443	0.05745416	Yes
row_57	GRM7	null	null	2667	1.317039966583252	0.059656955	Yes
row_58	PDGFB	null	null	2703	1.3081220388412476	0.062153306	Yes
row_59	MOBKL2A	null	null	2710	1.3063600063323975	0.068906225	Yes
row_60	MASP2	null	null	2813	1.267693042755127	0.061568435	Yes
row_61	VASP	null	null	2817	1.2660880088806152	0.06876169	Yes
row_62	IKZF4	null	null	2832	1.2613060474395752	0.07434038	Yes
row_63	PDE3B	null	null	2840	1.2597240209579468	0.08094652	Yes
row_64	SCD5	null	null	2892	1.2426910400390625	0.08109442	Yes
row_65	DNAJB5	null	null	2951	1.2233860492706299	0.08021487	Yes
row_66	ATP1B4	null	null	3088	1.185839056968689	0.06788662	Yes
row_67	CACNA1I	null	null	3095	1.183182954788208	0.074639544	Yes
row_68	GNG4	null	null	3102	1.1792290210723877	0.08139246	Yes
row_69	TNF	null	null	3138	1.170140027999878	0.083888814	Yes
row_70	SASH1	null	null	3142	1.1688569784164429	0.09108207	Yes
row_71	NUAK1	null	null	3151	1.166301965713501	0.09754143	Yes
row_72	ZBTB7A	null	null	3168	1.1612379550933838	0.102826566	Yes
row_73	REL	null	null	3174	1.1599810123443604	0.10972626	Yes
row_74	CDC42EP4	null	null	3200	1.1525139808654785	0.11369039	Yes
row_75	TCF3	null	null	3203	1.1512819528579712	0.12103042	Yes
row_76	LTBP2	null	null	3314	1.1215649843215942	0.11251841	Yes
row_77	AKT2	null	null	3353	1.1113460063934326	0.114574425	Yes
row_78	CAPN5	null	null	3432	1.0883970260620117	0.11075931	Yes
row_79	SEMA6A	null	null	3594	1.0410449504852295	0.0947616	Yes
row_80	C3AR1	null	null	3623	1.0316040515899658	0.09828541	Yes
row_81	BCL2	null	null	3659	1.0214500427246094	0.10078175	Yes
row_82	TRPM3	null	null	3665	1.0205379724502563	0.10768145	Yes
row_83	TNFAIP6	null	null	3692	1.0115280151367188	0.1114988	Yes
row_84	MAPK10	null	null	3729	1.000087022781372	0.11384838	Yes
row_85	FMOD	null	null	3794	0.9838889837265015	0.11208816	Yes
row_86	TUBB2B	null	null	3805	0.98055499792099	0.11825397	Yes
row_87	OLAH	null	null	3843	0.9698920249938965	0.12045676	Yes
row_88	RAB11FIP1	null	null	3856	0.9682750105857849	0.126329	Yes
row_89	PML	null	null	3860	0.9674680233001709	0.13352226	Yes
row_90	LIMA1	null	null	3956	0.9401450157165527	0.12721191	Yes
row_91	WDR78	null	null	4010	0.9282050132751465	0.12706625	Yes
row_92	ASH1L	null	null	4070	0.9115960001945496	0.12603994	Yes
row_93	HLCS	null	null	4078	0.910181999206543	0.13264607	Yes
row_94	RBM12B	null	null	4100	0.9017890095710754	0.13719732	Yes
row_95	MAN1C1	null	null	4127	0.8949170112609863	0.14101468	Yes
row_96	SNN	null	null	4317	0.8527200222015381	0.12090718	No
row_97	PMP2	null	null	4454	0.8239960074424744	0.10857893	No
row_98	AKAP7	null	null	4501	0.8125659823417664	0.10946072	No
row_99	NF1	null	null	4567	0.7943410277366638	0.10755373	No
row_100	NPAL2	null	null	4581	0.7905719876289368	0.11327919	No
row_101	SAP30	null	null	4656	0.7737450003623962	0.1100512	No
row_102	GGTA1	null	null	4770	0.7467489838600159	0.10109884	No
row_103	DCBLD2	null	null	4901	0.7087180018424988	0.089651264	No
row_104	AMPH	null	null	4965	0.6947349905967712	0.088037826	No
row_105	API5	null	null	5106	0.659246027469635	0.07512246	No
row_106	GNG2	null	null	5257	0.6268069744110107	0.06073932	No
row_107	LGALS8	null	null	5264	0.6246060132980347	0.06749224	No
row_108	GGA2	null	null	5291	0.6180700063705444	0.0713096	No
row_109	PCDH11X	null	null	5403	0.5938869714736938	0.0626508	No
row_110	CEACAM1	null	null	5424	0.5894780158996582	0.06734882	No
row_111	ARHGEF10	null	null	5468	0.5791410207748413	0.06867095	No
row_112	HORMAD2	null	null	5735	0.5174990296363831	0.03726153	No
row_113	EPC1	null	null	5826	0.49875399470329285	0.03168508	No
row_114	ACTN2	null	null	5881	0.48500800132751465	0.031392645	No
row_115	CLDN10	null	null	5908	0.47868698835372925	0.03521	No
row_116	ENPP3	null	null	6018	0.4532969892024994	0.02684476	No
row_117	H3F3A	null	null	6155	0.42121899127960205	0.014516511	No
row_118	LUZP1	null	null	6165	0.41916200518608093	0.020829095	No
row_119	VGLL3	null	null	6243	0.39542898535728455	0.01716076	No
row_120	ETV1	null	null	6252	0.3924170136451721	0.023620123	No
row_121	NTRK3	null	null	6256	0.3894270062446594	0.030813375	No
row_122	NMT2	null	null	6327	0.37272098660469055	0.02817249	No
row_123	PLEKHA5	null	null	6384	0.3576219975948334	0.027586496	No
row_124	ZKSCAN1	null	null	6426	0.3451409935951233	0.029202178	No
row_125	SMURF2	null	null	6438	0.3416939973831177	0.035221204	No
row_126	HNRPDL	null	null	6460	0.3350690007209778	0.03977245	No
row_127	MBP	null	null	6512	0.31957000494003296	0.03992035	No
row_128	ACSL6	null	null	6751	0.23471599817276	0.012620722	No
row_129	ANKRD26	null	null	6772	0.22586199641227722	0.017318746	No
row_130	MTAP	null	null	6844	0.1936360001564026	0.014531081	No
