# Supplementary material for: Signatures of RNA binding proteins globally coupled to effective microRNA target sites
Source: HighWire-hosted journal article supplement (doi:10.1101/gr.103259.109), 2010-05-27
Supplement: Table_S13.zip [file PROTEIN_COMPLEX_ASSEMBLY.xls]

NAME	PROBE	GENE SYMBOL	GENE_TITLE	RANK IN GENE LIST	RANK METRIC SCORE	RUNNING ES	CORE ENRICHMENT
row_0	BCL10	null	null	3	3.699057102203369	0.012383577	Yes
row_1	SEPT11	null	null	26	3.699057102203369	0.021999896	Yes
row_2	ALDH5A1	null	null	99	3.699057102203369	0.024333954	Yes
row_3	STOM	null	null	251	3.398026943206787	0.015162039	Yes
row_4	SMAD3	null	null	444	3.000087022781372	1.8670107E-5	Yes
row_5	KPNA3	null	null	475	2.9209060668945312	0.008469827	Yes
row_6	WASF3	null	null	487	2.9209060668945312	0.019688243	Yes
row_7	HCFC1	null	null	533	2.853959083557129	0.02595472	Yes
row_8	GJC1	null	null	608	2.744813919067383	0.027997488	Yes
row_9	SLC7A7	null	null	618	2.744813919067383	0.039507195	Yes
row_10	SYK	null	null	721	2.552928924560547	0.037471894	Yes
row_11	COX15	null	null	753	2.522965908050537	0.045777407	Yes
row_12	WIPF1	null	null	787	2.494936943054199	0.053791627	Yes
row_13	EPRS	null	null	899	2.3566339015960693	0.05044552	Yes
row_14	MLL	null	null	945	2.3188459873199463	0.056711998	Yes
row_15	TJP1	null	null	1001	2.251899003982544	0.061522026	Yes
row_16	VIL1	null	null	1013	2.236659049987793	0.07274044	Yes
row_17	IL1RAP	null	null	1250	2.036298990249634	0.05118868	Yes
row_18	DARS	null	null	1276	2.0178160667419434	0.060368065	Yes
row_19	WAS	null	null	1348	1.9586939811706543	0.06284777	Yes
row_20	PICALM	null	null	1546	1.8298250436782837	0.046976175	Yes
row_21	CAPZA2	null	null	1649	1.769637942314148	0.044940874	Yes
row_22	CD2AP	null	null	1685	1.754573941230774	0.052663807	Yes
row_23	REPS2	null	null	1826	1.6820240020751953	0.045093987	Yes
row_24	IRAK1	null	null	1906	1.634598970413208	0.04640853	Yes
row_25	CAPZA1	null	null	1913	1.630871057510376	0.05835517	Yes
row_26	FANCA	null	null	1940	1.6198760271072388	0.06738891	Yes
row_27	PARD6B	null	null	2104	1.5437209606170654	0.05646925	Yes
row_28	TGFBR1	null	null	2236	1.4842129945755005	0.05021024	Yes
row_29	ANLN	null	null	2295	1.458508014678955	0.05458333	Yes
row_30	OXA1L	null	null	2299	1.4560190439224243	0.066966906	Yes
row_31	TLN2	null	null	2315	1.453544020652771	0.077602744	Yes
row_32	VCL	null	null	2369	1.431885004043579	0.08270406	Yes
row_33	CD40	null	null	2497	1.3830870389938354	0.077027634	Yes
row_34	PEX13	null	null	2623	1.333569049835205	0.07164249	Yes
row_35	LIN7A	null	null	2630	1.3317010402679443	0.08358914	Yes
row_36	PPARGC1A	null	null	2671	1.317039966583252	0.09058384	Yes
row_37	GOPC	null	null	2772	1.2824159860610962	0.08883983	Yes
row_38	SMAD4	null	null	2794	1.2741750478744507	0.098601796	Yes
row_39	VAMP3	null	null	2802	1.2709219455718994	0.11040279	Yes
row_40	COX11	null	null	2917	1.2351640462875366	0.106619745	Yes
row_41	TP63	null	null	3096	1.1818610429763794	0.09351541	Yes
row_42	PXN	null	null	3223	1.1463890075683594	0.08798463	Yes
row_43	SYT1	null	null	3296	1.1273479461669922	0.09031869	Yes
row_44	TPPP	null	null	3307	1.1238689422607422	0.101682745	Yes
row_45	SKAP2	null	null	3313	1.1215649843215942	0.11377503	Yes
row_46	EID2	null	null	3578	1.0458439588546753	0.08814521	Yes
row_47	MUC20	null	null	3658	1.0223629474639893	0.08945975	Yes
row_48	TAPBP	null	null	3695	1.0106370449066162	0.09703703	Yes
row_49	APC	null	null	3790	0.9847270250320435	0.0961669	Yes
row_50	FMOD	null	null	3794	0.9838889837265015	0.108550474	Yes
row_51	PML	null	null	3860	0.9674680233001709	0.11190405	Yes
row_52	IKBKAP	null	null	3895	0.9579049944877625	0.11977263	Yes
row_53	COX10	null	null	3997	0.9311590194702148	0.117882974	Yes
row_54	SH3BGR	null	null	4032	0.9223560094833374	0.12575154	Yes
row_55	NOD2	null	null	4143	0.8901709914207458	0.12255108	Yes
row_56	SLC7A6	null	null	4184	0.8821529746055603	0.1295458	Yes
row_57	MDM2	null	null	4206	0.8775429725646973	0.13930775	Yes
row_58	NFS1	null	null	4234	0.8703969717025757	0.14819585	Yes
row_59	MNAT1	null	null	4356	0.8429319858551025	0.1433933	Yes
row_60	HFE	null	null	4370	0.8393179774284363	0.15432042	Yes
row_61	WASL	null	null	4537	0.7997840046882629	0.14296383	Yes
row_62	ADRB2	null	null	4616	0.7836570143699646	0.144424	Yes
row_63	SCUBE3	null	null	4654	0.7737450003623962	0.15185565	Yes
row_64	INSR	null	null	4668	0.7706609964370728	0.16278277	Yes
row_65	AASS	null	null	4670	0.7696380019187927	0.17545764	Yes
row_66	PARD3	null	null	4694	0.7625430226325989	0.18492831	Yes
row_67	COX18	null	null	4936	0.700797975063324	0.16264834	No
row_68	HPRT1	null	null	5451	0.5841119885444641	0.1006072	No
row_69	CREBBP	null	null	5683	0.5290889739990234	0.07978367	No
row_70	CDC42	null	null	5767	0.5095670223236084	0.08051563	No
row_71	ACTN2	null	null	5881	0.48500800132751465	0.076878235	No
row_72	RANBP9	null	null	5978	0.4612619876861572	0.07571681	No
row_73	EIF2AK3	null	null	6105	0.4347110092639923	0.07018602	No
row_74	LAMC1	null	null	6392	0.3550580143928528	0.041352004	No
row_75	IGF1R	null	null	6570	0.30129098892211914	0.028393311	No
row_76	GJA1	null	null	6656	0.2738490104675293	0.028833982	No
row_77	MALT1	null	null	6800	0.21661199629306793	0.020827228	No
