# Supplementary material for: Signatures of RNA binding proteins globally coupled to effective microRNA target sites
Source: HighWire-hosted journal article supplement (doi:10.1101/gr.103259.109), 2010-05-27
Supplement: Table_S13.zip [file ranked_gene_list_na_pos_versus_na_neg_1266579792105.xls]

NAME	DESCRIPTION	GENE_SYMBOL	GENE_TITLE	SCORE
RBM35B	null	null	null	3.699057
ATRN	null	null	null	3.699057
ENAH	null	null	null	3.699057
BCL10	null	null	null	3.699057
NR2C2	null	null	null	3.699057
ZFHX3	null	null	null	3.699057
CPEB4	null	null	null	3.699057
SLC16A7	null	null	null	3.699057
TET3	null	null	null	3.699057
PLEKHA2	null	null	null	3.699057
RALBP1	null	null	null	3.699057
ATXN1	null	null	null	3.699057
ITPRIPL2	null	null	null	3.699057
PTPRJ	null	null	null	3.699057
ACADSB	null	null	null	3.699057
SLC4A7	null	null	null	3.699057
ANGPTL7	null	null	null	3.699057
SH2B1	null	null	null	3.699057
SMC5	null	null	null	3.699057
TBL1X	null	null	null	3.699057
CAMKK2	null	null	null	3.699057
NR2F6	null	null	null	3.699057
PAG1	null	null	null	3.699057
COL24A1	null	null	null	3.699057
SH3GLB1	null	null	null	3.699057
IL17D	null	null	null	3.699057
SEPT11	null	null	null	3.699057
EXOC2	null	null	null	3.699057
ZXDC	null	null	null	3.699057
KDELC2	null	null	null	3.699057
ICK	null	null	null	3.699057
GTPBP8	null	null	null	3.699057
C18ORF45	null	null	null	3.699057
MAP3K7IP3	null	null	null	3.699057
SOBP	null	null	null	3.699057
AGPAT3	null	null	null	3.699057
AGFG1	null	null	null	3.699057
LDLRAD3	null	null	null	3.699057
YES1	null	null	null	3.699057
MGAT4A	null	null	null	3.699057
FNBP1	null	null	null	3.699057
TTC28	null	null	null	3.699057
ZDHHC5	null	null	null	3.699057
SOST	null	null	null	3.699057
ZFX	null	null	null	3.699057
C10ORF12	null	null	null	3.699057
CREB1	null	null	null	3.699057
CREB5	null	null	null	3.699057
CALHM3	null	null	null	3.699057
RBM47	null	null	null	3.699057
RBM33	null	null	null	3.699057
AFF1	null	null	null	3.699057
SLC6A4	null	null	null	3.699057
SOX4	null	null	null	3.699057
CNOT6L	null	null	null	3.699057
ATP8B1	null	null	null	3.699057
CYS1	null	null	null	3.699057
MSI1	null	null	null	3.699057
ATP8A1	null	null	null	3.699057
GAS1	null	null	null	3.699057
PKIG	null	null	null	3.699057
TACC1	null	null	null	3.699057
MIB1	null	null	null	3.699057
PM20D2	null	null	null	3.699057
DLGAP1	null	null	null	3.699057
GRIA2	null	null	null	3.699057
TTL	null	null	null	3.699057
OLIG2	null	null	null	3.699057
BCL2L11	null	null	null	3.699057
DULLARD	null	null	null	3.699057
BMP8A	null	null	null	3.699057
SNF1LK	null	null	null	3.699057
CNOT6	null	null	null	3.699057
SAFB2	null	null	null	3.699057
DCK	null	null	null	3.699057
INPP5E	null	null	null	3.699057
IGF2BP1	null	null	null	3.699057
PLAG1	null	null	null	3.699057
H6PD	null	null	null	3.699057
USP2	null	null	null	3.699057
LIX1	null	null	null	3.699057
LANCL2	null	null	null	3.699057
ONECUT2	null	null	null	3.699057
SOX11	null	null	null	3.699057
CR1	null	null	null	3.699057
C9ORF102	null	null	null	3.699057
MED13	null	null	null	3.699057
TFAP2B	null	null	null	3.699057
FYCO1	null	null	null	3.699057
F2RL2	null	null	null	3.699057
XIAP	null	null	null	3.699057
SSR1	null	null	null	3.699057
WDR32	null	null	null	3.699057
SFRS12IP1	null	null	null	3.699057
ZNRF3	null	null	null	3.699057
NKX2-8	null	null	null	3.699057
ROD1	null	null	null	3.699057
UNK	null	null	null	3.699057
STK4	null	null	null	3.699057
ALDH5A1	null	null	null	3.699057
ACVR2A	null	null	null	3.699057
DUSP19	null	null	null	3.699057
SDK1	null	null	null	3.699057
MTMR9	null	null	null	3.699057
FBXO21	null	null	null	3.699057
HOXC13	null	null	null	3.699057
APLP2	null	null	null	3.699057
MCF2L	null	null	null	3.699057
LIN54	null	null	null	3.699057
CARD8	null	null	null	3.699057
LIN7C	null	null	null	3.699057
C8ORF79	null	null	null	3.699057
TNIK	null	null	null	3.699057
GNB4	null	null	null	3.699057
LRIG3	null	null	null	3.699057
EWSR1	null	null	null	3.699057
PXMP3	null	null	null	3.699057
CNTNAP2	null	null	null	3.699057
PIGA	null	null	null	3.699057
HIPK1	null	null	null	3.699057
HIPK2	null	null	null	3.699057
QKI	null	null	null	3.699057
CLIC6	null	null	null	3.699057
NUFIP2	null	null	null	3.699057
C1ORF96	null	null	null	3.699057
FGD6	null	null	null	3.699057
HRH4	null	null	null	3.699057
DSC2	null	null	null	3.699057
DBN1	null	null	null	3.699057
PPARA	null	null	null	3.699057
C1ORF144	null	null	null	3.699057
RAB11FIP4	null	null	null	3.699057
TOMM70A	null	null	null	3.699057
PHC3	null	null	null	3.699057
LEF1	null	null	null	3.699057
POM121C	null	null	null	3.699057
PHF20L1	null	null	null	3.699057
TNRC6B	null	null	null	3.699057
FAM174B	null	null	null	3.699057
SIRT1	null	null	null	3.699057
ROCK2	null	null	null	3.699057
SPTLC2	null	null	null	3.699057
COL4A2	null	null	null	3.699057
TMEM45B	null	null	null	3.699057
UHRF1	null	null	null	3.699057
SERBP1	null	null	null	3.699057
BAI1	null	null	null	3.699057
ZNF354C	null	null	null	3.699057
HERC3	null	null	null	3.699057
GATAD2B	null	null	null	3.699057
MLL2	null	null	null	3.699057
RTKN2	null	null	null	3.699057
URB1	null	null	null	3.699057
ZNF395	null	null	null	3.699057
SFMBT1	null	null	null	3.699057
KLHDC5	null	null	null	3.699057
DYRK1A	null	null	null	3.699057
RNF126	null	null	null	3.699057
CCR6	null	null	null	3.699057
CDC37L1	null	null	null	3.699057
GJA3	null	null	null	3.699057
JPH1	null	null	null	3.699057
PPP6C	null	null	null	3.699057
SFT2D3	null	null	null	3.699057
PTCH1	null	null	null	3.699057
TRIM33	null	null	null	3.699057
AK2	null	null	null	3.699057
FUBP3	null	null	null	3.699057
CD93	null	null	null	3.699057
MAP3K1	null	null	null	3.699057
CDC2L6	null	null	null	3.699057
KAT2B	null	null	null	3.699057
GOLGA9P	null	null	null	3.699057
C15ORF29	null	null	null	3.699057
XPO4	null	null	null	3.699057
SLC44A5	null	null	null	3.699057
HMGB1	null	null	null	3.699057
MRC2	null	null	null	3.699057
DICER1	null	null	null	3.699057
SUMO1P3	null	null	null	3.699057
NUP50	null	null	null	3.699057
ZYG11B	null	null	null	3.699057
SCAMP1	null	null	null	3.699057
LMBR1	null	null	null	3.699057
LST1	null	null	null	3.699057
LARS	null	null	null	3.699057
CUL5	null	null	null	3.699057
STAG2	null	null	null	3.699057
PDK1	null	null	null	3.699057
EHMT1	null	null	null	3.699057
CDC14A	null	null	null	3.699057
IRF2BP2	null	null	null	3.699057
GLDN	null	null	null	3.699057
PRKACA	null	null	null	3.699057
TMEM181	null	null	null	3.699057
SPIRE1	null	null	null	3.699057
PDE10A	null	null	null	3.699057
CBFB	null	null	null	3.699057
C18ORF1	null	null	null	3.699057
ZNF207	null	null	null	3.699057
TRIM8	null	null	null	3.699057
GALNT2	null	null	null	3.699057
NOTUM	null	null	null	3.699057
DNAJC21	null	null	null	3.699057
FZD2	null	null	null	3.699057
C20ORF194	null	null	null	3.699057
MED13L	null	null	null	3.699057
CALCRL	null	null	null	3.699057
MPP7	null	null	null	3.699057
ANP32E	null	null	null	3.398027
CACNG2	null	null	null	3.398027
FRS3	null	null	null	3.398027
ADARB1	null	null	null	3.398027
TMEM170B	null	null	null	3.398027
NEO1	null	null	null	3.398027
SSX2IP	null	null	null	3.398027
MIER3	null	null	null	3.398027
WWC2	null	null	null	3.398027
NEUROD2	null	null	null	3.398027
PARD6G	null	null	null	3.398027
SMU1	null	null	null	3.398027
PTPRE	null	null	null	3.398027
SAPS2	null	null	null	3.398027
RBM15B	null	null	null	3.398027
PDCD6IP	null	null	null	3.398027
IAPP	null	null	null	3.398027
CYCS	null	null	null	3.398027
PDS5A	null	null	null	3.398027
PLXNA1	null	null	null	3.398027
ZC3H4	null	null	null	3.398027
MARCH4	null	null	null	3.398027
MARCH1	null	null	null	3.398027
FAM101B	null	null	null	3.398027
ZCCHC14	null	null	null	3.398027
ADSSL1	null	null	null	3.398027
CD109	null	null	null	3.398027
FOXL1	null	null	null	3.398027
FAM168B	null	null	null	3.398027
TBP	null	null	null	3.398027
DPPA5	null	null	null	3.398027
LIPA	null	null	null	3.398027
PROX1	null	null	null	3.398027
GDF6	null	null	null	3.398027
FAM13A1	null	null	null	3.398027
ARSB	null	null	null	3.398027
CCDC62	null	null	null	3.398027
SEC22A	null	null	null	3.398027
FBN2	null	null	null	3.398027
POLS	null	null	null	3.398027
SPATA5	null	null	null	3.398027
UTY	null	null	null	3.398027
STOM	null	null	null	3.398027
ZNF738	null	null	null	3.398027
SDK2	null	null	null	3.398027
ZNF740	null	null	null	3.398027
BNC2	null	null	null	3.398027
STXBP1	null	null	null	3.398027
NT5C2	null	null	null	3.398027
BCL11A	null	null	null	3.398027
ARHGAP26	null	null	null	3.398027
IQGAP2	null	null	null	3.398027
SLMO2	null	null	null	3.398027
PAM	null	null	null	3.398027
B4GALT1	null	null	null	3.398027
MFAP3L	null	null	null	3.398027
KIF3A	null	null	null	3.398027
BTBD11	null	null	null	3.398027
RAP2B	null	null	null	3.398027
CLIC2	null	null	null	3.398027
ZNF578	null	null	null	3.398027
FAM172A	null	null	null	3.398027
FCHO2	null	null	null	3.398027
EDEM1	null	null	null	3.398027
MYST3	null	null	null	3.398027
PHF1	null	null	null	3.398027
KIAA0430	null	null	null	3.398027
PPP1R3D	null	null	null	3.398027
ARHGEF10L	null	null	null	3.398027
TLE3	null	null	null	3.398027
RTF1	null	null	null	3.398027
COL4A5	null	null	null	3.398027
DCP2	null	null	null	3.398027
YPEL5	null	null	null	3.398027
ANKRD43	null	null	null	3.398027
RYK	null	null	null	3.398027
RAX2	null	null	null	3.398027
EFCAB10	null	null	null	3.398027
TWISTNB	null	null	null	3.398027
RIPK1	null	null	null	3.398027
C10ORF114	null	null	null	3.398027
SF3A1	null	null	null	3.398027
DNAJB12	null	null	null	3.398027
IKZF2	null	null	null	3.398027
RIOK3	null	null	null	3.398027
FGFR1	null	null	null	3.398027
GABRA4	null	null	null	3.398027
ZC3H12C	null	null	null	3.398027
ZC3H11A	null	null	null	3.398027
ZIC1	null	null	null	3.398027
HMGB3	null	null	null	3.398027
ZDHHC8P	null	null	null	3.398027
ZNF148	null	null	null	3.398027
ZNF167	null	null	null	3.398027
PDXK	null	null	null	3.398027
CASP8	null	null	null	3.398027
CNTN2	null	null	null	3.398027
ATP2B4	null	null	null	3.398027
TCF20	null	null	null	3.398027
CLEC16A	null	null	null	3.398027
XYLT1	null	null	null	3.398027
CTDSPL	null	null	null	3.398027
NGF	null	null	null	3.398027
CACNA1A	null	null	null	3.398027
PDE9A	null	null	null	3.398027
EIF2C4	null	null	null	3.398027
CTSC	null	null	null	3.398027
CLPTM1L	null	null	null	3.221936
UBFD1	null	null	null	3.221936
ASAH3L	null	null	null	3.221936
PPAP2B	null	null	null	3.221936
ANGPTL1	null	null	null	3.221936
FAM40B	null	null	null	3.221936
FAM44A	null	null	null	3.221936
KLHL4	null	null	null	3.221936
SLC30A7	null	null	null	3.221936
OSTM1	null	null	null	3.221936
CATSPER1	null	null	null	3.221936
KLF9	null	null	null	3.221936
GIMAP1	null	null	null	3.221936
SVOPL	null	null	null	3.221936
DIDO1	null	null	null	3.221936
ELOVL2	null	null	null	3.221936
FAM104A	null	null	null	3.221936
PSMA5	null	null	null	3.221936
MSL3	null	null	null	3.221936
TTPA	null	null	null	3.221936
MKNK2	null	null	null	3.221936
PHF13	null	null	null	3.221936
BMPR2	null	null	null	3.221936
PCDHA9	null	null	null	3.221936
TWSG1	null	null	null	3.221936
NKX3-1	null	null	null	3.221936
KIRREL	null	null	null	3.221936
SET	null	null	null	3.221936
MED23	null	null	null	3.221936
LIFR	null	null	null	3.221936
TRDMT1	null	null	null	3.221936
P4HA1	null	null	null	3.221936
GRIPAP1	null	null	null	3.221936
DPP9	null	null	null	3.221936
RCAN2	null	null	null	3.221936
PPP1R16B	null	null	null	3.221936
PPP1R15B	null	null	null	3.221936
KRAS	null	null	null	3.221936
PCTK1	null	null	null	3.221936
GNB1	null	null	null	3.221936
PKNOX1	null	null	null	3.221936
SELE	null	null	null	3.221936
PLCXD3	null	null	null	3.221936
DSG3	null	null	null	3.221936
ANGEL2	null	null	null	3.221936
ETS1	null	null	null	3.221936
PHF2	null	null	null	3.221936
BRPF3	null	null	null	3.221936
GALNT13	null	null	null	3.221936
FOSL2	null	null	null	3.221936
SPSB1	null	null	null	3.221936
ARL13B	null	null	null	3.221936
DUSP3	null	null	null	3.221936
RNF169	null	null	null	3.221936
ZCCHC3	null	null	null	3.221936
AGK	null	null	null	3.221936
ZFR2	null	null	null	3.221936
EGR3	null	null	null	3.221936
N4BP2	null	null	null	3.221936
HMX2	null	null	null	3.221936
PTTG1IP	null	null	null	3.221936
TMEM192	null	null	null	3.221936
PCNP	null	null	null	3.221936
MBNL2	null	null	null	3.221936
ST8SIA3	null	null	null	3.096997
SIDT1	null	null	null	3.096997
FBLN2	null	null	null	3.096997
ZMIZ1	null	null	null	3.096997
PPM1D	null	null	null	3.096997
NR3C2	null	null	null	3.096997
IL1RAPL1	null	null	null	3.096997
KLHL3	null	null	null	3.096997
BVES	null	null	null	3.096997
NFIB	null	null	null	3.096997
RIT1	null	null	null	3.096997
KLHL24	null	null	null	3.096997
ANKLE2	null	null	null	3.096997
HMGCS1	null	null	null	3.096997
TTC38	null	null	null	3.096997
FAM102B	null	null	null	3.096997
BUD13	null	null	null	3.096997
FAM152B	null	null	null	3.096997
PKP2	null	null	null	3.096997
MMP24	null	null	null	3.096997
PKN1	null	null	null	3.096997
MAT2B	null	null	null	3.096997
DHODH	null	null	null	3.096997
RNF34	null	null	null	3.096997
ZMYND11	null	null	null	3.096997
HELZ	null	null	null	3.096997
C4ORF34	null	null	null	3.096997
ITGB8	null	null	null	3.096997
JHDM1D	null	null	null	3.096997
MXD4	null	null	null	3.096997
ZMPSTE24	null	null	null	3.096997
PLAGL1	null	null	null	3.096997
RC3H2	null	null	null	3.096997
C16ORF45	null	null	null	3.096997
CEP57	null	null	null	3.096997
EIF4E3	null	null	null	3.096997
C1ORF62	null	null	null	3.096997
ALG10B	null	null	null	3.096997
SMPD3	null	null	null	3.096997
C10ORF104	null	null	null	3.096997
CCNJ	null	null	null	3.096997
RFX7	null	null	null	3.096997
EP400	null	null	null	3.096997
ZIC5	null	null	null	3.096997
NSL1	null	null	null	3.096997
ZSCAN23	null	null	null	3.096997
TMEM19	null	null	null	3.096997
GLCE	null	null	null	3.096997
PIK3R1	null	null	null	3.096997
DPYSL2	null	null	null	3.096997
FZD7	null	null	null	3.096997
PBX2	null	null	null	3.096997
FZR1	null	null	null	3.096997
ARL4C	null	null	null	3.000087
WEE2	null	null	null	3.000087
PIP5K3	null	null	null	3.000087
AFF4	null	null	null	3.000087
SETD8	null	null	null	3.000087
TXK	null	null	null	3.000087
APIP	null	null	null	3.000087
CCND1	null	null	null	3.000087
WHSC2	null	null	null	3.000087
OPALIN	null	null	null	3.000087
RIC8B	null	null	null	3.000087
SMAD3	null	null	null	3.000087
CENPN	null	null	null	3.000087
FGL2	null	null	null	3.000087
C17ORF85	null	null	null	3.000087
DSC3	null	null	null	3.000087
ZNF639	null	null	null	3.000087
ERGIC1	null	null	null	3.000087
YOD1	null	null	null	3.000087
CYP2B7P1	null	null	null	3.000087
FAM78A	null	null	null	3.000087
RGS7BP	null	null	null	3.000087
ABHD13	null	null	null	3.000087
IL16	null	null	null	3.000087
GGPS1	null	null	null	3.000087
DGCR8	null	null	null	3.000087
GOLGA8A	null	null	null	3.000087
SLC23A2	null	null	null	3.000087
ZMYM6	null	null	null	3.000087
CUL2	null	null	null	3.000087
GLTP	null	null	null	3.000087
TMEM121	null	null	null	3.000087
BCL2L2	null	null	null	3.000087
ZDHHC21	null	null	null	3.000087
STX6	null	null	null	3.000087
SLC7A5	null	null	null	3.000087
DCP1B	null	null	null	3.000087
AMOTL2	null	null	null	2.920906
SLC16A6	null	null	null	2.920906
SLC16A9	null	null	null	2.920906
HK2	null	null	null	2.920906
PAK6	null	null	null	2.920906
KPNA3	null	null	null	2.920906
CRTAP	null	null	null	2.920906
BEND3	null	null	null	2.920906
KCNE1	null	null	null	2.920906
ZCCHC24	null	null	null	2.920906
PPP1CB	null	null	null	2.920906
SOX9	null	null	null	2.920906
VPS36	null	null	null	2.920906
GLRA2	null	null	null	2.920906
DMD	null	null	null	2.920906
ZNF285A	null	null	null	2.920906
SHOX2	null	null	null	2.920906
WASF3	null	null	null	2.920906
KIAA1383	null	null	null	2.920906
PXDN	null	null	null	2.920906
COMTD1	null	null	null	2.920906
PTGS2	null	null	null	2.920906
LIMD1	null	null	null	2.920906
IQGAP1	null	null	null	2.920906
TRAM2	null	null	null	2.920906
C3ORF62	null	null	null	2.920906
TUBB1	null	null	null	2.920906
SLC39A3	null	null	null	2.920906
SLC39A1	null	null	null	2.920906
WAPAL	null	null	null	2.920906
C12ORF72	null	null	null	2.920906
ATP11A	null	null	null	2.920906
ABCA13	null	null	null	2.920906
CHRAC1	null	null	null	2.920906
ST6GAL1	null	null	null	2.920906
PHACTR2	null	null	null	2.920906
TRMT11	null	null	null	2.920906
ZFYVE1	null	null	null	2.920906
DNPEP	null	null	null	2.920906
CCDC88A	null	null	null	2.920906
FAM110C	null	null	null	2.853959
PTPRS	null	null	null	2.853959
FCHSD2	null	null	null	2.853959
LYSMD3	null	null	null	2.853959
GYS2	null	null	null	2.853959
ZBED4	null	null	null	2.853959
KCNE4	null	null	null	2.853959
KCNC3	null	null	null	2.853959
AFF2	null	null	null	2.853959
ELP4	null	null	null	2.853959
MIA3	null	null	null	2.853959
C9ORF46	null	null	null	2.853959
IL1R1	null	null	null	2.853959
ARHGAP11A	null	null	null	2.853959
DCX	null	null	null	2.853959
C9ORF126	null	null	null	2.853959
RMI1	null	null	null	2.853959
ZBTB41	null	null	null	2.853959
DDX46	null	null	null	2.853959
TRUB1	null	null	null	2.853959
SFPQ	null	null	null	2.853959
BRUNOL4	null	null	null	2.853959
FAM176A	null	null	null	2.853959
HCFC1	null	null	null	2.853959
TLL2	null	null	null	2.853959
ZNF17	null	null	null	2.853959
ZNF677	null	null	null	2.853959
RASSF5	null	null	null	2.853959
TCF7L2	null	null	null	2.853959
ZNF704	null	null	null	2.853959
MEGF10	null	null	null	2.853959
GOLGA8E	null	null	null	2.853959
H2AFY2	null	null	null	2.853959
CXORF23	null	null	null	2.853959
RIPK5	null	null	null	2.853959
DNAJC11	null	null	null	2.853959
C10ORF46	null	null	null	2.795967
FAM123A	null	null	null	2.795967
FREM2	null	null	null	2.795967
CNNM1	null	null	null	2.795967
FOXK2	null	null	null	2.795967
SMARCAL1	null	null	null	2.795967
RCBTB1	null	null	null	2.795967
DEK	null	null	null	2.795967
RNF144A	null	null	null	2.795967
DENND4B	null	null	null	2.795967
HGSNAT	null	null	null	2.795967
ADAMTSL5	null	null	null	2.795967
HAS2	null	null	null	2.795967
BCL11B	null	null	null	2.795967
C3ORF56	null	null	null	2.795967
ZNF511	null	null	null	2.795967
FAM82B	null	null	null	2.795967
RBL1	null	null	null	2.795967
SFRS9	null	null	null	2.795967
BAT2L	null	null	null	2.795967
LRP5	null	null	null	2.795967
FAM130A2	null	null	null	2.795967
STX16	null	null	null	2.795967
GLIS3	null	null	null	2.795967
GOLGA8F	null	null	null	2.795967
GOLGA8G	null	null	null	2.795967
MYEF2	null	null	null	2.795967
KLF12	null	null	null	2.795967
SIX4	null	null	null	2.795967
ZFAT	null	null	null	2.795967
TMEM127	null	null	null	2.795967
FKRP	null	null	null	2.795967
NLGN3	null	null	null	2.795967
OBSCN	null	null	null	2.795967
SEPHS1	null	null	null	2.795967
PAQR5	null	null	null	2.795967
BRWD1	null	null	null	2.744814
GK5	null	null	null	2.744814
JMJD2B	null	null	null	2.744814
FAM119A	null	null	null	2.744814
EXOC5	null	null	null	2.744814
NSMAF	null	null	null	2.744814
RIN2	null	null	null	2.744814
ZBTB8	null	null	null	2.744814
ABLIM1	null	null	null	2.744814
MARK1	null	null	null	2.744814
EFR3A	null	null	null	2.744814
MIDN	null	null	null	2.744814
FGF7P2	null	null	null	2.744814
DCUN1D2	null	null	null	2.744814
CNNM2	null	null	null	2.744814
CBL	null	null	null	2.744814
SNAI2	null	null	null	2.744814
C9ORF47	null	null	null	2.744814
IER5	null	null	null	2.744814
ACVR2B	null	null	null	2.744814
NPTX2	null	null	null	2.744814
PRSS7	null	null	null	2.744814
AOF1	null	null	null	2.744814
RBBP7	null	null	null	2.744814
C1ORF178	null	null	null	2.744814
ENOX2	null	null	null	2.744814
GJC1	null	null	null	2.744814
B3GALNT2	null	null	null	2.744814
PRDM16	null	null	null	2.744814
DYNC1LI2	null	null	null	2.744814
CTNNBIP1	null	null	null	2.744814
SNRNP48	null	null	null	2.744814
UBXN10	null	null	null	2.744814
TTLL2	null	null	null	2.744814
NADK	null	null	null	2.744814
CMTM4	null	null	null	2.744814
SLC7A7	null	null	null	2.744814
CACNA1C	null	null	null	2.744814
ANKRD34B	null	null	null	2.699057
DACH2	null	null	null	2.699057
CSTF3	null	null	null	2.699057
CYP2U1	null	null	null	2.699057
VANGL1	null	null	null	2.699057
MARCKS	null	null	null	2.699057
APAF1	null	null	null	2.699057
USP14	null	null	null	2.699057
DLX2	null	null	null	2.699057
MED26	null	null	null	2.699057
STAM	null	null	null	2.699057
ATP13A1	null	null	null	2.699057
IGF1	null	null	null	2.699057
HCCS	null	null	null	2.699057
TNPO1	null	null	null	2.699057
C17ORF39	null	null	null	2.699057
DSEL	null	null	null	2.699057
FAM84A	null	null	null	2.699057
ZNF605	null	null	null	2.699057
RBM3	null	null	null	2.699057
MLL5	null	null	null	2.699057
DHX32	null	null	null	2.699057
IQSEC1	null	null	null	2.699057
SLC44A1	null	null	null	2.699057
MYB	null	null	null	2.699057
DNAJC27	null	null	null	2.699057
BTBD3	null	null	null	2.657664
PGM2L1	null	null	null	2.657664
MON1B	null	null	null	2.657664
TTC21B	null	null	null	2.657664
SULF2	null	null	null	2.657664
PRR7	null	null	null	2.657664
HERPUD2	null	null	null	2.657664
FOXD3	null	null	null	2.657664
WSB1	null	null	null	2.657664
FAM169A	null	null	null	2.657664
SRF	null	null	null	2.657664
MAN2B2	null	null	null	2.657664
ATE1	null	null	null	2.657664
MYBL1	null	null	null	2.657664
DPYS	null	null	null	2.657664
C19ORF26	null	null	null	2.657664
YWHAB	null	null	null	2.657664
LRFN3	null	null	null	2.657664
PTBP1	null	null	null	2.657664
CDK6	null	null	null	2.657664
HMX1	null	null	null	2.657664
DNAJB7	null	null	null	2.657664
MCM3APAS	null	null	null	2.657664
BARHL1	null	null	null	2.619876
LRRC1	null	null	null	2.619876
NR2E1	null	null	null	2.619876
JMJD2C	null	null	null	2.619876
ACAP2	null	null	null	2.619876
LARP5	null	null	null	2.619876
IPO8	null	null	null	2.619876
ORAOV1	null	null	null	2.619876
RNGTT	null	null	null	2.619876
GLRA3	null	null	null	2.619876
SSB	null	null	null	2.619876
MAPK1	null	null	null	2.619876
GLP1R	null	null	null	2.619876
C2ORF49	null	null	null	2.619876
ZNF862	null	null	null	2.619876
TNPO2	null	null	null	2.619876
ZNF567	null	null	null	2.619876
FERMT2	null	null	null	2.619876
ZNF609	null	null	null	2.619876
KIF18A	null	null	null	2.619876
CWC15	null	null	null	2.619876
SNRNP35	null	null	null	2.619876
MKX	null	null	null	2.619876
PDE1A	null	null	null	2.619876
XRN1	null	null	null	2.619876
ST8SIA2	null	null	null	2.585114
OPA1	null	null	null	2.585114
VENTX	null	null	null	2.585114
SLC4A5	null	null	null	2.585114
CYP27C1	null	null	null	2.585114
SLC5A5	null	null	null	2.585114
PRKAR2B	null	null	null	2.585114
SLC6A1	null	null	null	2.585114
DIRAS2	null	null	null	2.585114
NAPEPLD	null	null	null	2.585114
PLK4	null	null	null	2.585114
ARL3	null	null	null	2.585114
OXCT1	null	null	null	2.585114
ANKRD45	null	null	null	2.585114
RNF141	null	null	null	2.585114
SMARCC2	null	null	null	2.585114
PURB	null	null	null	2.585114
TMEM131	null	null	null	2.585114
SLC39A14	null	null	null	2.585114
ZNF295	null	null	null	2.585114
NBN	null	null	null	2.585114
C11ORF30	null	null	null	2.585114
STAU1	null	null	null	2.585114
PLA2G7	null	null	null	2.552929
POFUT2	null	null	null	2.552929
IYD	null	null	null	2.552929
KBTBD8	null	null	null	2.552929
SYK	null	null	null	2.552929
KIAA0586	null	null	null	2.552929
DBT	null	null	null	2.552929
SOX12	null	null	null	2.552929
GLRX2	null	null	null	2.552929
STK38	null	null	null	2.552929
CYP24A1	null	null	null	2.552929
PCBD2	null	null	null	2.552929
FBXO30	null	null	null	2.552929
ZNF829	null	null	null	2.552929
CAPN7	null	null	null	2.552929
RBBP5	null	null	null	2.552929
COL4A4	null	null	null	2.552929
SLC10A2	null	null	null	2.552929
KATNAL1	null	null	null	2.552929
AP4E1	null	null	null	2.552929
C7ORF42	null	null	null	2.552929
ANKFY1	null	null	null	2.552929
FZD4	null	null	null	2.552929
TICAM2	null	null	null	2.522966
C10ORF54	null	null	null	2.522966
YTHDC1	null	null	null	2.522966
TCTEX1D1	null	null	null	2.522966
ENTPD1	null	null	null	2.522966
SLC17A5	null	null	null	2.522966
MARVELD2	null	null	null	2.522966
PCDH19	null	null	null	2.522966
NKX2-2	null	null	null	2.522966
SPATA6	null	null	null	2.522966
DDX19A	null	null	null	2.522966
CDKN1C	null	null	null	2.522966
STK17A	null	null	null	2.522966
COX15	null	null	null	2.522966
PGGT1B	null	null	null	2.522966
BMP6	null	null	null	2.522966
SLC16A14	null	null	null	2.522966
CRLF1	null	null	null	2.522966
FAM183B	null	null	null	2.522966
NHSL1	null	null	null	2.522966
EZH1	null	null	null	2.522966
NRIP1	null	null	null	2.522966
INSIG1	null	null	null	2.522966
CC2D1B	null	null	null	2.522966
MAF	null	null	null	2.522966
TMEM64	null	null	null	2.522966
ESCO1	null	null	null	2.522966
HECTD2	null	null	null	2.522966
FAM117B	null	null	null	2.494937
GP6	null	null	null	2.494937
SOCS5	null	null	null	2.494937
CDC5L	null	null	null	2.494937
FOXC1	null	null	null	2.494937
BIVM	null	null	null	2.494937
DAPP1	null	null	null	2.494937
OLA1	null	null	null	2.494937
DHFRL1	null	null	null	2.494937
MED10	null	null	null	2.494937
GINS1	null	null	null	2.494937
GCLM	null	null	null	2.494937
SRPK2	null	null	null	2.494937
KIF4B	null	null	null	2.494937
NCOR1	null	null	null	2.494937
AMIGO2	null	null	null	2.494937
ZNF44	null	null	null	2.494937
KIAA1755	null	null	null	2.494937
LRBA	null	null	null	2.494937
WIPF1	null	null	null	2.494937
RHOB	null	null	null	2.494937
RYBP	null	null	null	2.494937
C7ORF10	null	null	null	2.494937
BTBD1	null	null	null	2.468608
KLHL28	null	null	null	2.468608
JAM3	null	null	null	2.468608
EDNRB	null	null	null	2.468608
TMEM132B	null	null	null	2.468608
LYRM7	null	null	null	2.468608
SQSTM1	null	null	null	2.468608
DTL	null	null	null	2.468608
WDR91	null	null	null	2.468608
SERTAD2	null	null	null	2.468608
DRD5	null	null	null	2.468608
EEF2K	null	null	null	2.468608
FAM178A	null	null	null	2.468608
ANKH	null	null	null	2.468608
LPGAT1	null	null	null	2.468608
WIT1	null	null	null	2.468608
PRDM15	null	null	null	2.468608
NUMB	null	null	null	2.468608
C11ORF61	null	null	null	2.468608
FAM48A	null	null	null	2.443784
KLHL6	null	null	null	2.443784
TTC39C	null	null	null	2.443784
EPHA3	null	null	null	2.443784
ZC3H6	null	null	null	2.443784
C10ORF18	null	null	null	2.443784
SEC16A	null	null	null	2.443784
UBTF	null	null	null	2.443784
KCTD1	null	null	null	2.443784
GAPVD1	null	null	null	2.443784
SP8	null	null	null	2.443784
GRK7	null	null	null	2.443784
CLPP	null	null	null	2.443784
CHST6	null	null	null	2.443784
CCDC127	null	null	null	2.443784
PRPS2	null	null	null	2.443784
GNB2	null	null	null	2.443784
CDC42SE1	null	null	null	2.443784
VASH1	null	null	null	2.443784
CYP1B1	null	null	null	2.443784
NDST3	null	null	null	2.443784
ZNF100	null	null	null	2.443784
KIAA0020	null	null	null	2.443784
HOXD13	null	null	null	2.443784
ING1	null	null	null	2.443784
MTMR12	null	null	null	2.420303
TAP2	null	null	null	2.420303
FAM165A	null	null	null	2.420303
ITGB6	null	null	null	2.420303
WDR17	null	null	null	2.420303
HOXA11	null	null	null	2.420303
SHROOM3	null	null	null	2.420303
C1ORF186	null	null	null	2.420303
ZNF25	null	null	null	2.420303
B4GALNT3	null	null	null	2.420303
HOMER1	null	null	null	2.420303
FAM73A	null	null	null	2.420303
EPAS1	null	null	null	2.420303
EPB41	null	null	null	2.420303
TGFA	null	null	null	2.420303
SUFU	null	null	null	2.420303
SCNN1G	null	null	null	2.398027
TWF2	null	null	null	2.398027
PCGF3	null	null	null	2.398027
SLC6A6	null	null	null	2.398027
RPN1	null	null	null	2.398027
ADAM22	null	null	null	2.398027
RABL2A	null	null	null	2.398027
EIF4H	null	null	null	2.398027
WDR23	null	null	null	2.398027
FAM62B	null	null	null	2.398027
KIF2A	null	null	null	2.398027
PRDM2	null	null	null	2.398027
REV3L	null	null	null	2.398027
VPREB3	null	null	null	2.398027
YPEL2	null	null	null	2.398027
SBNO2	null	null	null	2.398027
C19ORF2	null	null	null	2.398027
MET	null	null	null	2.398027
MN1	null	null	null	2.398027
ANXA4	null	null	null	2.398027
JMJD1C	null	null	null	2.376838
PLEKHA1	null	null	null	2.376838
HIC2	null	null	null	2.376838
TTC33	null	null	null	2.376838
FBXW11	null	null	null	2.376838
SPOCK2	null	null	null	2.376838
ATP9A	null	null	null	2.376838
GOLPH3	null	null	null	2.376838
SERPINE1	null	null	null	2.376838
C1ORF69	null	null	null	2.376838
FHDC1	null	null	null	2.376838
MEGF11	null	null	null	2.376838
DENR	null	null	null	2.376838
GLT1D1	null	null	null	2.376838
PWP1	null	null	null	2.376838
BTBD2	null	null	null	2.356634
DIO2	null	null	null	2.356634
IFNGR2	null	null	null	2.356634
ABCA2	null	null	null	2.356634
MTM1	null	null	null	2.356634
ORC5L	null	null	null	2.356634
C20ORF24	null	null	null	2.356634
SHE	null	null	null	2.356634
TTTY9A	null	null	null	2.356634
MED17	null	null	null	2.356634
VPS13D	null	null	null	2.356634
ZBTB11	null	null	null	2.356634
DDX59	null	null	null	2.356634
EPRS	null	null	null	2.356634
HSF2	null	null	null	2.356634
GNAQ	null	null	null	2.356634
C21ORF7	null	null	null	2.356634
PUNC	null	null	null	2.356634
POLR1D	null	null	null	2.356634
JARID1A	null	null	null	2.356634
G3BP1	null	null	null	2.356634
NUS1	null	null	null	2.356634
CASC4	null	null	null	2.356634
HMG20B	null	null	null	2.337329
SMC6	null	null	null	2.337329
SNCG	null	null	null	2.337329
MGAT4C	null	null	null	2.337329
TRPM7	null	null	null	2.337329
CPD	null	null	null	2.337329
C4ORF36	null	null	null	2.337329
KLRC3	null	null	null	2.337329
MBTD1	null	null	null	2.337329
PHF3	null	null	null	2.337329
FAM83G	null	null	null	2.337329
NOTCH1	null	null	null	2.337329
C12ORF26	null	null	null	2.337329
PIK3CG	null	null	null	2.337329
PLA2G4A	null	null	null	2.337329
CANX	null	null	null	2.337329
RHBDD1	null	null	null	2.337329
PCSK2	null	null	null	2.337329
CMTM6	null	null	null	2.337329
STX7	null	null	null	2.337329
SLC2A12	null	null	null	2.337329
AP3M2	null	null	null	2.318846
PRKCE	null	null	null	2.318846
LASS2	null	null	null	2.318846
ODF2L	null	null	null	2.318846
AFAP1	null	null	null	2.318846
GPR135	null	null	null	2.318846
ALDH2	null	null	null	2.318846
NKAIN2	null	null	null	2.318846
TSSK1B	null	null	null	2.318846
POR	null	null	null	2.318846
SMOC1	null	null	null	2.318846
DIP2B	null	null	null	2.318846
TNFAIP3	null	null	null	2.318846
C10ORF118	null	null	null	2.318846
GABRA1	null	null	null	2.318846
MLL	null	null	null	2.318846
PPID	null	null	null	2.301117
MBD1	null	null	null	2.301117
FAM153A	null	null	null	2.301117
VPS16	null	null	null	2.301117
IDI2	null	null	null	2.301117
ARID5B	null	null	null	2.301117
MFSD10	null	null	null	2.301117
KIAA0802	null	null	null	2.301117
EIF5A2	null	null	null	2.301117
GPD1L	null	null	null	2.301117
BCAR1	null	null	null	2.301117
MATR3	null	null	null	2.301117
GPR1	null	null	null	2.301117
WDFY1	null	null	null	2.301117
CREB3L2	null	null	null	2.301117
PAQR3	null	null	null	2.301117
EXOC6	null	null	null	2.284084
ABCG1	null	null	null	2.284084
ABCE1	null	null	null	2.284084
CYLD	null	null	null	2.284084
USP28	null	null	null	2.284084
PNMA2	null	null	null	2.284084
CHST13	null	null	null	2.284084
FOXO6	null	null	null	2.284084
SERINC1	null	null	null	2.284084
BMI1	null	null	null	2.284084
RP2	null	null	null	2.284084
SFRP1	null	null	null	2.284084
A4GALT	null	null	null	2.284084
LRRC8B	null	null	null	2.284084
SAMD11	null	null	null	2.284084
PCMTD2	null	null	null	2.284084
ATF1	null	null	null	2.267693
ANGPTL5	null	null	null	2.267693
PLEKHM2	null	null	null	2.267693
WSB2	null	null	null	2.267693
PODXL	null	null	null	2.267693
UBE2L3	null	null	null	2.267693
C16ORF35	null	null	null	2.267693
GNAZ	null	null	null	2.267693
PXMP4	null	null	null	2.267693
KIF5C	null	null	null	2.267693
BACH2	null	null	null	2.267693
ALKBH1	null	null	null	2.267693
MPPED2	null	null	null	2.267693
CASP9	null	null	null	2.267693
FRAT2	null	null	null	2.267693
MTSS1	null	null	null	2.251899
SNCB	null	null	null	2.251899
CLCC1	null	null	null	2.251899
C2ORF43	null	null	null	2.251899
SLC22A3	null	null	null	2.251899
COL7A1	null	null	null	2.251899
TRIM35	null	null	null	2.251899
C21ORF34	null	null	null	2.251899
TJP1	null	null	null	2.251899
KTI12	null	null	null	2.251899
PRKAB2	null	null	null	2.251899
S100A11	null	null	null	2.251899
SLITRK5	null	null	null	2.236659
ACSL1	null	null	null	2.236659
EPHA7	null	null	null	2.236659
ATP8A2	null	null	null	2.236659
FBXO9	null	null	null	2.236659
NT5C3L	null	null	null	2.236659
LHX9	null	null	null	2.236659
SENP7	null	null	null	2.236659
VIL1	null	null	null	2.236659
SACM1L	null	null	null	2.236659
PPIAL4G	null	null	null	2.236659
DUXA	null	null	null	2.236659
CDH1	null	null	null	2.236659
AGPS	null	null	null	2.236659
CNTD1	null	null	null	2.221936
PDXDC1	null	null	null	2.221936
C5ORF51	null	null	null	2.221936
BZW2	null	null	null	2.221936
GLOD4	null	null	null	2.221936
TPD52L1	null	null	null	2.221936
LIN28B	null	null	null	2.221936
OXER1	null	null	null	2.221936
GPR82	null	null	null	2.221936
ERBB4	null	null	null	2.221936
NDRG1	null	null	null	2.221936
PRPF4B	null	null	null	2.221936
JAKMIP2	null	null	null	2.221936
ZFP1	null	null	null	2.221936
LY9	null	null	null	2.221936
STAM2	null	null	null	2.221936
SLC7A2	null	null	null	2.221936
ADAL	null	null	null	2.207695
BIRC5	null	null	null	2.207695
TC2N	null	null	null	2.207695
PSMD3	null	null	null	2.207695
C5ORF33	null	null	null	2.207695
MAPK4	null	null	null	2.207695
TEAD1	null	null	null	2.207695
ZNF764	null	null	null	2.207695
ZCCHC8	null	null	null	2.207695
CAMK2G	null	null	null	2.193907
TTC30A	null	null	null	2.193907
DMC1	null	null	null	2.193907
PPP1R14C	null	null	null	2.193907
COG5	null	null	null	2.193907
CPLX1	null	null	null	2.193907
ZNF383	null	null	null	2.193907
LRP8	null	null	null	2.193907
SP100	null	null	null	2.193907
TMEM194A	null	null	null	2.193907
LPAR1	null	null	null	2.193907
TTLL9	null	null	null	2.193907
SYNPO2	null	null	null	2.193907
NFXL1	null	null	null	2.180543
A1BG	null	null	null	2.180543
CEP170	null	null	null	2.180543
TRNAU1AP	null	null	null	2.180543
GABPA	null	null	null	2.180543
C1ORF141	null	null	null	2.180543
PHF6	null	null	null	2.180543
CACNA2D3	null	null	null	2.180543
WDFY3	null	null	null	2.180543
POLR2D	null	null	null	2.180543
KCTD12	null	null	null	2.180543
BDP1	null	null	null	2.167578
VAMP7	null	null	null	2.167578
KCNJ2	null	null	null	2.167578
CYB5A	null	null	null	2.167578
KIAA0664	null	null	null	2.167578
PRRG1	null	null	null	2.167578
ACTR2	null	null	null	2.167578
GRIN2D	null	null	null	2.167578
TTTY9B	null	null	null	2.167578
ZBTB46	null	null	null	2.167578
GNA14	null	null	null	2.167578
C1ORF9	null	null	null	2.167578
GATA6	null	null	null	2.167578
CDC14B	null	null	null	2.167578
FNBP1L	null	null	null	2.167578
NIN	null	null	null	2.167578
ADRA2A	null	null	null	2.154989
NWD1	null	null	null	2.154989
SOCS6	null	null	null	2.154989
ELF5	null	null	null	2.154989
NR4A3	null	null	null	2.154989
METT10D	null	null	null	2.154989
ELOVL6	null	null	null	2.154989
RAB33B	null	null	null	2.154989
PSMG4	null	null	null	2.154989
FOXF2	null	null	null	2.154989
SMC1B	null	null	null	2.154989
ZNF813	null	null	null	2.154989
B4GALT5	null	null	null	2.154989
PLCXD2	null	null	null	2.154989
ZNF71	null	null	null	2.154989
ZNF629	null	null	null	2.154989
RBM9	null	null	null	2.154989
QSOX2	null	null	null	2.154989
ZIC4	null	null	null	2.154989
RER1	null	null	null	2.154989
KRTAP4-11	null	null	null	2.154989
ATF2	null	null	null	2.142754
ITPKB	null	null	null	2.142754
VAMP4	null	null	null	2.142754
C20ORF46	null	null	null	2.142754
FOXE2	null	null	null	2.142754
TUB	null	null	null	2.142754
SRGAP1	null	null	null	2.142754
BPNT1	null	null	null	2.142754
AKAP13	null	null	null	2.142754
GAGE1	null	null	null	2.142754
ITGA4	null	null	null	2.142754
PPIAL4A	null	null	null	2.142754
SGCB	null	null	null	2.142754
DUSP7	null	null	null	2.142754
RAB3A	null	null	null	2.142754
THBD	null	null	null	2.142754
ADD3	null	null	null	2.130855
PAK7	null	null	null	2.130855
CHML	null	null	null	2.130855
MTA1	null	null	null	2.130855
TGFBR3	null	null	null	2.130855
HEPHL1	null	null	null	2.130855
KIAA1377	null	null	null	2.130855
GPR155	null	null	null	2.130855
RIMKLB2	null	null	null	2.130855
RAB22A	null	null	null	2.130855
LAMP1	null	null	null	2.130855
CXORF36	null	null	null	2.130855
ARFGEF2	null	null	null	2.130855
CACNA1H	null	null	null	2.130855
AEBP2	null	null	null	2.119273
CDC40	null	null	null	2.119273
ATP8B2	null	null	null	2.119273
DMKN	null	null	null	2.119273
NMUR1	null	null	null	2.119273
GOLGA3	null	null	null	2.119273
C4ORF42	null	null	null	2.119273
C8ORF45	null	null	null	2.119273
C2ORF39	null	null	null	2.119273
CAPN1	null	null	null	2.119273
ZNF350	null	null	null	2.119273
DUSP4	null	null	null	2.119273
RASGEF1A	null	null	null	2.119273
WIPF2	null	null	null	2.119273
PCNX	null	null	null	2.119273
FAM154B	null	null	null	2.107992
RNF10	null	null	null	2.107992
DVL1L1	null	null	null	2.107992
SYCE1	null	null	null	2.107992
F2R	null	null	null	2.107992
H1F0	null	null	null	2.107992
CPS1	null	null	null	2.107992
ZNF490	null	null	null	2.107992
PRPF38B	null	null	null	2.107992
HYLS1	null	null	null	2.107992
CASC3	null	null	null	2.107992
HINT1	null	null	null	2.096997
TCP10L2	null	null	null	2.096997
DEPDC4	null	null	null	2.096997
SC4MOL	null	null	null	2.096997
MARCH5	null	null	null	2.096997
TOR1B	null	null	null	2.096997
SON	null	null	null	2.096997
NCBP2	null	null	null	2.096997
C2ORF71	null	null	null	2.096997
RFESD	null	null	null	2.096997
SGCZ	null	null	null	2.096997
STX12	null	null	null	2.096997
NPEPPS	null	null	null	2.096997
PAQR8	null	null	null	2.096997
WDR40A	null	null	null	2.086273
R3HDM2	null	null	null	2.086273
ZBED1	null	null	null	2.086273
RTCD1	null	null	null	2.086273
EBP	null	null	null	2.086273
SNX27	null	null	null	2.086273
GPR107	null	null	null	2.086273
UVRAG	null	null	null	2.086273
NACC2	null	null	null	2.086273
IFIT3	null	null	null	2.086273
TIAL1	null	null	null	2.086273
SPHKAP	null	null	null	2.086273
TINAGL1	null	null	null	2.086273
NFYB	null	null	null	2.075808
C18ORF25	null	null	null	2.075808
MAST2	null	null	null	2.075808
FLRT2	null	null	null	2.075808
PLK2	null	null	null	2.075808
DOK6	null	null	null	2.075808
RPP14	null	null	null	2.075808
TMEM209	null	null	null	2.075808
MOBKL1A	null	null	null	2.075808
LRFN5	null	null	null	2.075808
NCOA3	null	null	null	2.075808
NR6A1	null	null	null	2.075808
SH3GL1	null	null	null	2.075808
SLC35D1	null	null	null	2.075808
SMCR7L	null	null	null	2.075808
TSPAN7	null	null	null	2.075808
FAM118A	null	null	null	2.065588
DAAM1	null	null	null	2.065588
GOLM1	null	null	null	2.065588
MOCS2	null	null	null	2.065588
SCRIB	null	null	null	2.065588
PI15	null	null	null	2.065588
SS18L1	null	null	null	2.065588
SFRS1	null	null	null	2.065588
FLNC	null	null	null	2.065588
NOC3L	null	null	null	2.065588
ADRBK1	null	null	null	2.065588
ERP27	null	null	null	2.065588
C1QTNF8	null	null	null	2.065588
MAP1LC3B2	null	null	null	2.065588
JARID2	null	null	null	2.055604
RBMS2	null	null	null	2.055604
CSDE1	null	null	null	2.055604
C2ORF50	null	null	null	2.055604
EPS15L1	null	null	null	2.055604
C6ORF192	null	null	null	2.055604
DSG4	null	null	null	2.055604
C1ORF109	null	null	null	2.055604
CD72	null	null	null	2.055604
RPL27A	null	null	null	2.055604
GLI3	null	null	null	2.055604
TMEM68	null	null	null	2.055604
DNAJC14	null	null	null	2.055604
C11ORF82	null	null	null	2.055604
ARHGEF6	null	null	null	2.045844
PSME4	null	null	null	2.045844
TBC1D14	null	null	null	2.045844
GCH1	null	null	null	2.045844
GRPEL1	null	null	null	2.045844
EOMES	null	null	null	2.045844
TMF1	null	null	null	2.045844
TMEM220	null	null	null	2.045844
ZNF707	null	null	null	2.045844
SMARCB1	null	null	null	2.045844
NOC2L	null	null	null	2.045844
SNAP25	null	null	null	2.036299
LANCL1	null	null	null	2.036299
DENND5A	null	null	null	2.036299
C4ORF19	null	null	null	2.036299
ZBTB44	null	null	null	2.036299
F2RL1	null	null	null	2.036299
IL1RAP	null	null	null	2.036299
SDHC	null	null	null	2.036299
GMFG	null	null	null	2.036299
NAMPT	null	null	null	2.036299
LRRC66	null	null	null	2.036299
NRP1	null	null	null	2.036299
YIPF4	null	null	null	2.026959
MAP3K15	null	null	null	2.026959
EIF4B	null	null	null	2.026959
EXOSC10	null	null	null	2.026959
MTMR1	null	null	null	2.026959
C2ORF60	null	null	null	2.026959
MOSPD3	null	null	null	2.026959
SLC27A2	null	null	null	2.026959
FBXL20	null	null	null	2.026959
XPR1	null	null	null	2.026959
ATXN7L1	null	null	null	2.026959
MON2	null	null	null	2.026959
HNRNPL	null	null	null	2.026959
BRMS1L	null	null	null	2.017816
ACAD8	null	null	null	2.017816
MSRB2	null	null	null	2.017816
FAM126B	null	null	null	2.017816
TMCO3	null	null	null	2.017816
YY2	null	null	null	2.017816
FBXL3	null	null	null	2.017816
DARS	null	null	null	2.017816
C12ORF23	null	null	null	2.017816
IKZF3	null	null	null	2.017816
GATAD1	null	null	null	2.017816
SASS6	null	null	null	2.008861
SECISBP2	null	null	null	2.008861
PKIB	null	null	null	2.008861
B3GNT2	null	null	null	2.008861
RGS21	null	null	null	2.008861
MRPS25	null	null	null	2.008861
KIAA1128	null	null	null	2.008861
SLC34A2	null	null	null	2.008861
MAX	null	null	null	2.008861
C7ORF26	null	null	null	2.008861
FLRT3	null	null	null	2.000087
INPP5A	null	null	null	2.000087
TNFRSF21	null	null	null	2.000087
SECTM1	null	null	null	2.000087
ZFP30	null	null	null	2.000087
ALG9	null	null	null	2.000087
SUSD4	null	null	null	2.000087
GYLTL1B	null	null	null	2.000087
GCNT1	null	null	null	2.000087
FTSJ3	null	null	null	1.991487
KLF5	null	null	null	1.991487
RCOR1	null	null	null	1.991487
CNOT8	null	null	null	1.991487
LIPG	null	null	null	1.991487
MPZL1	null	null	null	1.991487
RNF150	null	null	null	1.991487
DEDD	null	null	null	1.991487
IL28RA	null	null	null	1.991487
FYB	null	null	null	1.983054
AMMECR1L	null	null	null	1.983054
GNG12	null	null	null	1.983054
BSG	null	null	null	1.983054
IDH2	null	null	null	1.983054
FRMPD4	null	null	null	1.983054
PRDX3	null	null	null	1.983054
ERGIC2	null	null	null	1.983054
ZNF35	null	null	null	1.983054
C21ORF67	null	null	null	1.983054
CASKIN2	null	null	null	1.983054
CACNA1E	null	null	null	1.983054
FAM46C	null	null	null	1.974781
HIST2H4A	null	null	null	1.974781
ANKRD13C	null	null	null	1.974781
BEGAIN	null	null	null	1.974781
PHF15	null	null	null	1.974781
ATP13A3	null	null	null	1.974781
GRSF1	null	null	null	1.974781
PLEKHG4B	null	null	null	1.974781
ZNF542	null	null	null	1.974781
TNFRSF13C	null	null	null	1.974781
CASP6	null	null	null	1.974781
ATRX	null	null	null	1.966663
LARP4	null	null	null	1.966663
MEST	null	null	null	1.966663
UBE2T	null	null	null	1.966663
SFRS2IP	null	null	null	1.966663
SYNE2	null	null	null	1.966663
GNPNAT1	null	null	null	1.966663
HOXA3	null	null	null	1.966663
PSIP1	null	null	null	1.966663
MTMR2	null	null	null	1.966663
DNAH8	null	null	null	1.966663
B4GALT7	null	null	null	1.966663
LCOR	null	null	null	1.966663
PRKAA1	null	null	null	1.966663
HIST2H4B	null	null	null	1.958694
SLC17A8	null	null	null	1.958694
CHM	null	null	null	1.958694
WAS	null	null	null	1.958694
TSEN2	null	null	null	1.958694
AGMAT	null	null	null	1.958694
TP53INP2	null	null	null	1.958694
RRP15	null	null	null	1.958694
CPEB2	null	null	null	1.950869
CTHRC1	null	null	null	1.950869
ARNT	null	null	null	1.950869
LTBP1	null	null	null	1.950869
MYADM	null	null	null	1.950869
AMPD3	null	null	null	1.950869
MYCL1	null	null	null	1.950869
RAB27B	null	null	null	1.950869
PDCL3	null	null	null	1.950869
NDST1	null	null	null	1.950869
ZNF238	null	null	null	1.950869
EIF2C2	null	null	null	1.950869
NPL	null	null	null	1.950869
FAM116A	null	null	null	1.943182
GRIP2	null	null	null	1.943182
FAM153B	null	null	null	1.943182
FOXJ1	null	null	null	1.943182
SOX18	null	null	null	1.943182
CNIH	null	null	null	1.943182
DTNA	null	null	null	1.943182
CPNE3	null	null	null	1.943182
BAZ1B	null	null	null	1.935629
FAM115A	null	null	null	1.935629
PAPOLA	null	null	null	1.935629
TNFRSF6B	null	null	null	1.935629
C4ORF43	null	null	null	1.935629
PIN4	null	null	null	1.935629
SNCAIP	null	null	null	1.935629
PET112L	null	null	null	1.935629
KIAA1712	null	null	null	1.935629
ZNF264	null	null	null	1.935629
PBRM1	null	null	null	1.935629
GCK	null	null	null	1.928205
HERPUD1	null	null	null	1.928205
ITPA	null	null	null	1.928205
PAXIP1	null	null	null	1.928205
KIAA2022	null	null	null	1.928205
MDFIC	null	null	null	1.928205
GPR177	null	null	null	1.928205
CCL25	null	null	null	1.928205
AFAP1L2	null	null	null	1.928205
FMR1	null	null	null	1.928205
RB1CC1	null	null	null	1.928205
CRKL	null	null	null	1.928205
FSD1L	null	null	null	1.928205
MIER1	null	null	null	1.920906
LONRF1	null	null	null	1.920906
YTHDC2	null	null	null	1.920906
KLHL13	null	null	null	1.920906
USO1	null	null	null	1.920906
DOC2A	null	null	null	1.920906
CROCC	null	null	null	1.920906
FOXN2	null	null	null	1.913727
GPRIN1	null	null	null	1.913727
FPGS	null	null	null	1.913727
PELO	null	null	null	1.913727
NARG2	null	null	null	1.913727
PRND	null	null	null	1.906665
EFR3B	null	null	null	1.906665
WDR20	null	null	null	1.906665
ZFYVE20	null	null	null	1.906665
UBXN4	null	null	null	1.906665
RBBP9	null	null	null	1.906665
KIAA0494	null	null	null	1.906665
RPS16	null	null	null	1.906665
METTL7A	null	null	null	1.906665
GABRG1	null	null	null	1.906665
ZNF143	null	null	null	1.906665
RARS2	null	null	null	1.906665
STAT2	null	null	null	1.906665
HSD11B2	null	null	null	1.899716
PAWR	null	null	null	1.899716
NEK7	null	null	null	1.899716
ZNF831	null	null	null	1.899716
LDB1	null	null	null	1.899716
IL33	null	null	null	1.899716
TET1	null	null	null	1.892877
TRERF1	null	null	null	1.892877
HMOX2	null	null	null	1.892877
PPEF2	null	null	null	1.892877
FGF8	null	null	null	1.892877
NPAS4	null	null	null	1.892877
ARX	null	null	null	1.892877
ZHX2	null	null	null	1.892877
TMEM137	null	null	null	1.892877
TMPRSS11F	null	null	null	1.892877
LATS1	null	null	null	1.886143
WWTR1	null	null	null	1.886143
OSBPL6	null	null	null	1.886143
SLC6A9	null	null	null	1.886143
GOLT1B	null	null	null	1.886143
AKAP11	null	null	null	1.886143
HOXC4	null	null	null	1.886143
PLCH1	null	null	null	1.886143
ESRRA	null	null	null	1.886143
ARHGAP18	null	null	null	1.886143
SYNM	null	null	null	1.886143
RABL3	null	null	null	1.886143
QSER1	null	null	null	1.879513
MECP2	null	null	null	1.879513
ST13	null	null	null	1.879513
SLFN13	null	null	null	1.879513
SGCD	null	null	null	1.879513
ATP10D	null	null	null	1.879513
TRIM13	null	null	null	1.879513
AIM1	null	null	null	1.879513
TRAF3IP1	null	null	null	1.879513
CYP2B6	null	null	null	1.879513
WIPI2	null	null	null	1.879513
CDH7	null	null	null	1.879513
GHR	null	null	null	1.872982
PCID2	null	null	null	1.872982
C18ORF19	null	null	null	1.872982
CYP20A1	null	null	null	1.872982
UBP1	null	null	null	1.872982
SGIP1	null	null	null	1.872982
KIAA0776	null	null	null	1.872982
B3GNT5	null	null	null	1.872982
TLK2	null	null	null	1.872982
DDA1	null	null	null	1.872982
PPM1B	null	null	null	1.866548
ZFY	null	null	null	1.866548
PCGF5	null	null	null	1.866548
DMWD	null	null	null	1.866548
PPAPDC2	null	null	null	1.866548
C6ORF106	null	null	null	1.866548
C1ORF35	null	null	null	1.866548
CDYL	null	null	null	1.866548
GM2A	null	null	null	1.866548
RAB3GAP2	null	null	null	1.860208
SLC4A4	null	null	null	1.860208
ABCB9	null	null	null	1.860208
OLR1	null	null	null	1.860208
ZDHHC3	null	null	null	1.860208
CA9	null	null	null	1.860208
C9ORF11	null	null	null	1.860208
RAPGEF2	null	null	null	1.860208
KIAA0182	null	null	null	1.860208
COX4NB	null	null	null	1.860208
MLF1IP	null	null	null	1.860208
FSTL4	null	null	null	1.860208
PDE11A	null	null	null	1.860208
TSPAN3	null	null	null	1.860208
ACPL2	null	null	null	1.853959
PMS1	null	null	null	1.853959
HNF4G	null	null	null	1.853959
C2ORF56	null	null	null	1.853959
C2ORF27	null	null	null	1.853959
PIM3	null	null	null	1.853959
PTN	null	null	null	1.853959
ZNF84	null	null	null	1.853959
IL6R	null	null	null	1.853959
DCP1A	null	null	null	1.853959
MPP3	null	null	null	1.853959
SCML2	null	null	null	1.847799
FAM18A	null	null	null	1.847799
MGAT5B	null	null	null	1.847799
NIPA1	null	null	null	1.847799
RGS19	null	null	null	1.847799
FBXO43	null	null	null	1.847799
SLMO1	null	null	null	1.847799
C1ORF212	null	null	null	1.847799
FERMT3	null	null	null	1.847799
GPR137C	null	null	null	1.847799
GEN1	null	null	null	1.841724
ATAD2B	null	null	null	1.841724
GNA12	null	null	null	1.841724
PIP4K2A	null	null	null	1.841724
MAP2K7	null	null	null	1.841724
DPY19L3	null	null	null	1.841724
MMD	null	null	null	1.841724
C2ORF18	null	null	null	1.835734
ZFP28	null	null	null	1.835734
SF3B1	null	null	null	1.835734
MAK	null	null	null	1.835734
ZNF292	null	null	null	1.835734
TNFSF11	null	null	null	1.835734
TET2	null	null	null	1.829825
BBS7	null	null	null	1.829825
UBTD2	null	null	null	1.829825
CCNE2	null	null	null	1.829825
IGF2AS	null	null	null	1.829825
BTNL9	null	null	null	1.829825
GRM1	null	null	null	1.829825
CECR6	null	null	null	1.829825
GTF2F2	null	null	null	1.829825
STXBP4	null	null	null	1.829825
NSUN2	null	null	null	1.829825
GOSR1	null	null	null	1.829825
SLC33A1	null	null	null	1.829825
KLF16	null	null	null	1.829825
APH1B	null	null	null	1.829825
DPY19L2	null	null	null	1.829825
PICALM	null	null	null	1.829825
DPP10	null	null	null	1.823996
MARCH7	null	null	null	1.823996
SIPA1L1	null	null	null	1.823996
ANKS1B	null	null	null	1.823996
NETO1	null	null	null	1.823996
C21ORF123	null	null	null	1.823996
BACE1	null	null	null	1.823996
ATP2C2	null	null	null	1.823996
STYX	null	null	null	1.823996
ELAC2	null	null	null	1.818243
SOCS1	null	null	null	1.818243
AP1G1	null	null	null	1.818243
SCAP	null	null	null	1.818243
SYNGAP1	null	null	null	1.818243
UACA	null	null	null	1.818243
INTS2	null	null	null	1.818243
TLL1	null	null	null	1.818243
CACNA1D	null	null	null	1.818243
NAV2	null	null	null	1.818243
PHF12	null	null	null	1.812566
PRRG3	null	null	null	1.812566
C4ORF46	null	null	null	1.812566
CCL11	null	null	null	1.812566
YWHAG	null	null	null	1.812566
TREM2	null	null	null	1.812566
CRIM1	null	null	null	1.812566
ZSWIM7	null	null	null	1.812566
MNX1	null	null	null	1.812566
SPIN1	null	null	null	1.806962
KIAA0753	null	null	null	1.806962
C8ORF34	null	null	null	1.806962
RPS6KA2	null	null	null	1.806962
ANUBL1	null	null	null	1.806962
SLC38A1	null	null	null	1.806962
C17ORF61	null	null	null	1.806962
MYH7B	null	null	null	1.806962
NR2F2	null	null	null	1.80143
NEUROD6	null	null	null	1.80143
TM4SF20	null	null	null	1.80143
MRPL4	null	null	null	1.80143
STAG1	null	null	null	1.80143
PAN3	null	null	null	1.795967
EFHC1	null	null	null	1.795967
SULT1A1	null	null	null	1.795967
C4ORF15	null	null	null	1.795967
PROS1	null	null	null	1.795967
COL18A1	null	null	null	1.795967
UPF3B	null	null	null	1.795967
TRAF7	null	null	null	1.795967
TIGIT	null	null	null	1.795967
RSBN1L	null	null	null	1.795967
PDSS1	null	null	null	1.795967
PLEKHA6	null	null	null	1.790572
EML1	null	null	null	1.790572
C10ORF26	null	null	null	1.790572
SLC29A1	null	null	null	1.790572
SYT16	null	null	null	1.790572
EPOR	null	null	null	1.790572
PAFAH1B2	null	null	null	1.790572
TMEM206	null	null	null	1.790572
NOP2	null	null	null	1.790572
GPC4	null	null	null	1.790572
MYBBP1A	null	null	null	1.790572
JAKMIP3	null	null	null	1.790572
CXCL5	null	null	null	1.790572
PCYOX1	null	null	null	1.790572
RDH10	null	null	null	1.790572
KHSRP	null	null	null	1.790572
GLUL	null	null	null	1.790572
NANP	null	null	null	1.790572
AAMP	null	null	null	1.785243
FAM19A2	null	null	null	1.785243
AMOT	null	null	null	1.785243
ZNF644	null	null	null	1.785243
ABCA12	null	null	null	1.785243
ZNF320	null	null	null	1.785243
SOCS4	null	null	null	1.779979
RIF1	null	null	null	1.779979
PABPC1L2A	null	null	null	1.779979
GLTSCR1	null	null	null	1.779979
PCDHB12	null	null	null	1.779979
NCRNA00029	null	null	null	1.779979
RBP2	null	null	null	1.779979
ZNF322B	null	null	null	1.779979
VEZF1	null	null	null	1.779979
ALPP	null	null	null	1.779979
KIF16B	null	null	null	1.779979
THAP3	null	null	null	1.779979
CAV1	null	null	null	1.779979
TMEM154	null	null	null	1.779979
ACBD3	null	null	null	1.774778
PAK2	null	null	null	1.774778
ID1	null	null	null	1.774778
ENTPD7	null	null	null	1.774778
CECR2	null	null	null	1.774778
BACH1	null	null	null	1.774778
ERMP1	null	null	null	1.774778
ZNF423	null	null	null	1.774778
NTN4	null	null	null	1.774778
UMOD	null	null	null	1.774778
PIAS4	null	null	null	1.769638
C10ORF71	null	null	null	1.769638
CAPZA2	null	null	null	1.769638
IARS	null	null	null	1.769638
PRKY	null	null	null	1.769638
WHSC1	null	null	null	1.769638
UBE2J2	null	null	null	1.769638
FBXO45	null	null	null	1.769638
HSPBAP1	null	null	null	1.769638
KCNIP3	null	null	null	1.769638
MACC1	null	null	null	1.769638
KLHDC10	null	null	null	1.769638
PRKCI	null	null	null	1.764558
C20ORF12	null	null	null	1.764558
TNFRSF1A	null	null	null	1.764558
SOX30	null	null	null	1.764558
STK35	null	null	null	1.764558
ZNRF2	null	null	null	1.764558
EIF4E1B	null	null	null	1.764558
EDN3	null	null	null	1.764558
ARHGAP10	null	null	null	1.764558
NOS1	null	null	null	1.764558
LRRC8D	null	null	null	1.764558
PFTK1	null	null	null	1.764558
STK38L	null	null	null	1.764558
FAM6A	null	null	null	1.764558
CHAD	null	null	null	1.759538
DOK1	null	null	null	1.759538
C6ORF91	null	null	null	1.759538
CWF19L2	null	null	null	1.759538
ENPEP	null	null	null	1.759538
NPAS2	null	null	null	1.759538
YBX1	null	null	null	1.759538
FCRL1	null	null	null	1.759538
ME3	null	null	null	1.759538
MAZ	null	null	null	1.759538
C1QTNF3	null	null	null	1.759538
DKC1	null	null	null	1.754574
CD2AP	null	null	null	1.754574
CCDC15	null	null	null	1.754574
GJA9	null	null	null	1.754574
CNGB1	null	null	null	1.754574
PUM2	null	null	null	1.754574
CPNE8	null	null	null	1.754574
TCHP	null	null	null	1.749667
MORC2	null	null	null	1.749667
SRFBP1	null	null	null	1.749667
CRLF3	null	null	null	1.749667
GLIS2	null	null	null	1.749667
PRPF40B	null	null	null	1.749667
UGT2B15	null	null	null	1.749667
LEP	null	null	null	1.749667
LRCH2	null	null	null	1.749667
PDE5A	null	null	null	1.749667
APEX2	null	null	null	1.749667
PAPPA2	null	null	null	1.744814
FAM123C	null	null	null	1.744814
PPP4R4	null	null	null	1.744814
C5ORF45	null	null	null	1.744814
CLCN5	null	null	null	1.744814
C4ORF40	null	null	null	1.744814
FAM76B	null	null	null	1.744814
CDH23	null	null	null	1.744814
HNRNPUL2	null	null	null	1.740015
EPHA1	null	null	null	1.740015
ZBTB2	null	null	null	1.740015
ST3GAL3	null	null	null	1.740015
OR1E1	null	null	null	1.740015
SCYL3	null	null	null	1.740015
ERN1	null	null	null	1.740015
IER2	null	null	null	1.740015
PIWIL4	null	null	null	1.740015
CA13	null	null	null	1.740015
ERF	null	null	null	1.735269
CDK2	null	null	null	1.735269
C13ORF37	null	null	null	1.735269
RAB3GAP1	null	null	null	1.730574
SEC62	null	null	null	1.730574
ZNF24	null	null	null	1.730574
RNF166	null	null	null	1.730574
TWIST1	null	null	null	1.730574
RABEPK	null	null	null	1.725929
SLC25A27	null	null	null	1.725929
ADCK2	null	null	null	1.725929
C6ORF62	null	null	null	1.725929
SREBF2	null	null	null	1.725929
C2ORF37	null	null	null	1.725929
COMT	null	null	null	1.725929
RAP2C	null	null	null	1.725929
SDCBP2	null	null	null	1.725929
PDCD11	null	null	null	1.725929
ANKRD32	null	null	null	1.725929
RNF139	null	null	null	1.725929
ZC3H12A	null	null	null	1.725929
GORASP2	null	null	null	1.725929
C15ORF40	null	null	null	1.725929
NT5E	null	null	null	1.725929
PRMT2	null	null	null	1.721333
LONRF2	null	null	null	1.721333
EFHD2	null	null	null	1.721333
SNX1	null	null	null	1.721333
HIVEP3	null	null	null	1.721333
GALNT10	null	null	null	1.721333
TXNDC4	null	null	null	1.721333
KIAA1549	null	null	null	1.721333
NEK6	null	null	null	1.716786
ABCA6	null	null	null	1.716786
CDCA3	null	null	null	1.716786
THUMPD1	null	null	null	1.716786
FAM109A	null	null	null	1.716786
FBXL5	null	null	null	1.716786
ASAP2	null	null	null	1.716786
ADAM10	null	null	null	1.716786
MYNN	null	null	null	1.716786
USP9X	null	null	null	1.716786
PLCB3	null	null	null	1.716786
FUBP1	null	null	null	1.716786
ZNF267	null	null	null	1.716786
CTDSP1	null	null	null	1.716786
VASN	null	null	null	1.712285
OSBPL2	null	null	null	1.712285
PTPDC1	null	null	null	1.712285
SEL1L	null	null	null	1.712285
ASPM	null	null	null	1.712285
SLFN11	null	null	null	1.712285
HISPPD1	null	null	null	1.712285
CALML4	null	null	null	1.712285
CCDC109B	null	null	null	1.712285
DAZ2	null	null	null	1.712285
ZNF696	null	null	null	1.712285
GUCY2C	null	null	null	1.712285
YLPM1	null	null	null	1.712285
TIPRL	null	null	null	1.712285
C11ORF45	null	null	null	1.712285
NAT5	null	null	null	1.712285
MMP11	null	null	null	1.707831
RAVER1	null	null	null	1.707831
NOM1	null	null	null	1.707831
ABCA11	null	null	null	1.707831
CDS2	null	null	null	1.707831
LAPTM4B	null	null	null	1.703422
ETV6	null	null	null	1.703422
FAM179B	null	null	null	1.703422
CCDC144A	null	null	null	1.699057
BTRC	null	null	null	1.699057
SHANK3	null	null	null	1.699057
TPD52L3	null	null	null	1.699057
KIF1B	null	null	null	1.699057
MAP2K3	null	null	null	1.699057
SH3PXD2B	null	null	null	1.694735
NUPL2	null	null	null	1.694735
SIAH2	null	null	null	1.694735
C1ORF102	null	null	null	1.694735
PDCL	null	null	null	1.694735
NHS	null	null	null	1.694735
ID3	null	null	null	1.690457
IRF4	null	null	null	1.690457
ZBTB6	null	null	null	1.690457
KCNT1	null	null	null	1.690457
PXMP2	null	null	null	1.690457
PPP2R2D	null	null	null	1.690457
IMPA2	null	null	null	1.690457
ARRDC5	null	null	null	1.690457
TRIM45	null	null	null	1.690457
SLC9A1	null	null	null	1.690457
SAMD1	null	null	null	1.690457
TIPARP	null	null	null	1.68622
HS6ST2	null	null	null	1.68622
FAM159B	null	null	null	1.68622
KIFC1	null	null	null	1.68622
SLC19A2	null	null	null	1.68622
GMPR	null	null	null	1.68622
PIGX	null	null	null	1.68622
CENPL	null	null	null	1.68622
DAZ1	null	null	null	1.68622
LRAT	null	null	null	1.68622
ATXN2L	null	null	null	1.68622
PCGF6	null	null	null	1.682024
C4ORF23	null	null	null	1.682024
REPS2	null	null	null	1.682024
RHBDF2	null	null	null	1.682024
TMEM150	null	null	null	1.682024
RUVBL1	null	null	null	1.682024
GFPT1	null	null	null	1.677868
MMP26	null	null	null	1.677868
NOL10	null	null	null	1.677868
TMEM38B	null	null	null	1.677868
PGD	null	null	null	1.677868
C15ORF41	null	null	null	1.677868
ZNF236	null	null	null	1.677868
SLC30A9	null	null	null	1.673751
CYB561D1	null	null	null	1.673751
ARAP2	null	null	null	1.673751
CCDC39	null	null	null	1.673751
C14ORF1	null	null	null	1.673751
TLR8	null	null	null	1.673751
DTX1	null	null	null	1.673751
FMO3	null	null	null	1.673751
FMNL3	null	null	null	1.673751
C6ORF206	null	null	null	1.673751
FAM3C2	null	null	null	1.669673
PLXND1	null	null	null	1.669673
FAM71F2	null	null	null	1.669673
TACC3	null	null	null	1.669673
ARID4A	null	null	null	1.669673
INPP5B	null	null	null	1.669673
DEGS1	null	null	null	1.669673
C19ORF22	null	null	null	1.669673
DAZ4	null	null	null	1.669673
PALB2	null	null	null	1.669673
FURIN	null	null	null	1.669673
AIDA	null	null	null	1.669673
PCF11	null	null	null	1.669673
PHF17	null	null	null	1.665633
TMEM57	null	null	null	1.665633
DHCR7	null	null	null	1.66163
NFKB1	null	null	null	1.66163
GDE1	null	null	null	1.66163
KITLG	null	null	null	1.66163
NDUFB1	null	null	null	1.66163
SPON1	null	null	null	1.66163
HNRNPA2B1	null	null	null	1.66163
SND1	null	null	null	1.657664
C4ORF32	null	null	null	1.657664
GCDH	null	null	null	1.657664
GNAI2	null	null	null	1.657664
HSDL2	null	null	null	1.657664
ZC3HAV1	null	null	null	1.657664
ACP1	null	null	null	1.653734
MELK	null	null	null	1.653734
KCNAB2	null	null	null	1.653734
PTENP1	null	null	null	1.653734
BID	null	null	null	1.653734
PNOC	null	null	null	1.653734
SIAH1	null	null	null	1.653734
CGNL1	null	null	null	1.653734
KBTBD11	null	null	null	1.653734
SLAIN2	null	null	null	1.653734
MAOA	null	null	null	1.649839
RBM17	null	null	null	1.649839
IL17RD	null	null	null	1.649839
RAB7L1	null	null	null	1.649839
ZNF619	null	null	null	1.649839
CARS	null	null	null	1.649839
UBE4A	null	null	null	1.645978
ZNF317	null	null	null	1.645978
MFSD5	null	null	null	1.645978
TTYH3	null	null	null	1.642152
FAM160B1	null	null	null	1.642152
FYTTD1	null	null	null	1.642152
STAT3	null	null	null	1.642152
ENDOD1	null	null	null	1.642152
IL6ST	null	null	null	1.638359
KPNA1	null	null	null	1.638359
UBE3C	null	null	null	1.638359
C6ORF165	null	null	null	1.638359
C10ORF113	null	null	null	1.638359
CTTNBP2NL	null	null	null	1.634599
TMTC1	null	null	null	1.634599
IRAK1	null	null	null	1.634599
LRP10	null	null	null	1.634599
FOXD4	null	null	null	1.634599
ERBB2	null	null	null	1.634599
POLR2H	null	null	null	1.634599
MUC3B	null	null	null	1.634599
SLC8A3	null	null	null	1.634599
CAPZA1	null	null	null	1.630871
C9ORF152	null	null	null	1.630871
CD300LD	null	null	null	1.630871
C2ORF67	null	null	null	1.630871
C11ORF46	null	null	null	1.630871
PRKG1	null	null	null	1.627175
C10ORF31	null	null	null	1.627175
C5ORF42	null	null	null	1.627175
PHLDA1	null	null	null	1.627175
CLIC4	null	null	null	1.627175
RNMTL1	null	null	null	1.627175
PUS1	null	null	null	1.627175
CALR	null	null	null	1.627175
SLC3A2	null	null	null	1.62351
TWF1	null	null	null	1.62351
CDKN1B	null	null	null	1.62351
CD70	null	null	null	1.62351
HNRNPU	null	null	null	1.62351
C11ORF87	null	null	null	1.62351
DEPDC6	null	null	null	1.619876
KIAA1958	null	null	null	1.619876
BCL2L10	null	null	null	1.619876
C2ORF25	null	null	null	1.619876
ATPAF1	null	null	null	1.619876
AES	null	null	null	1.619876
C12ORF5	null	null	null	1.619876
GOLGA6B	null	null	null	1.619876
FANCA	null	null	null	1.619876
TMEM189	null	null	null	1.619876
NEFL	null	null	null	1.616271
ANGPTL3	null	null	null	1.616271
MED1	null	null	null	1.616271
PRKCA	null	null	null	1.616271
MYO5A	null	null	null	1.616271
LIMS1	null	null	null	1.616271
ANO1	null	null	null	1.616271
FXYD5	null	null	null	1.616271
BCL9	null	null	null	1.612697
ADAM33	null	null	null	1.612697
MOSC1	null	null	null	1.612697
ADAMTS14	null	null	null	1.612697
RGS1	null	null	null	1.612697
NRF1	null	null	null	1.612697
RG9MTD2	null	null	null	1.612697
LRRK2	null	null	null	1.609152
PRCC	null	null	null	1.609152
PPIL3	null	null	null	1.609152
HMG2L1	null	null	null	1.609152
GNL3L	null	null	null	1.609152
CHSY1	null	null	null	1.609152
SAV1	null	null	null	1.609152
TMC6	null	null	null	1.609152
MBOAT1	null	null	null	1.609152
CLIP4	null	null	null	1.609152
MKL1	null	null	null	1.609152
CDRT15L2	null	null	null	1.609152
MCC	null	null	null	1.609152
MYLK4	null	null	null	1.605635
CXCL10	null	null	null	1.605635
TPCN1	null	null	null	1.605635
RBM12	null	null	null	1.605635
ITGA2	null	null	null	1.605635
UCKL1	null	null	null	1.605635
CASK	null	null	null	1.605635
KLRAQ1	null	null	null	1.602147
SMEK2	null	null	null	1.602147
DNAJC6	null	null	null	1.602147
ATP6V1B2	null	null	null	1.598686
ST5	null	null	null	1.598686
CECR5	null	null	null	1.598686
DAZL	null	null	null	1.598686
THAP2	null	null	null	1.598686
SLC30A8	null	null	null	1.595253
C5ORF24	null	null	null	1.595253
CMBL	null	null	null	1.595253
DAZ3	null	null	null	1.595253
ZNF667	null	null	null	1.595253
MTCH1	null	null	null	1.591847
TMEM87B	null	null	null	1.591847
EIF2AK2	null	null	null	1.591847
STK32B	null	null	null	1.591847
C17ORF58	null	null	null	1.591847
CCNYL1	null	null	null	1.591847
RSBN1	null	null	null	1.591847
AGBL4	null	null	null	1.591847
MGRN1	null	null	null	1.588467
[truncated: 4,945 more rows]
