# Supplementary material for: Signatures of RNA binding proteins globally coupled to effective microRNA target sites
Source: HighWire-hosted journal article supplement (doi:10.1101/gr.103259.109), 2010-05-27
Supplement: Table_S13.zip [file RESPONSE_TO_ENDOGENOUS_STIMULUS.xls]

NAME	PROBE	GENE SYMBOL	GENE_TITLE	RANK IN GENE LIST	RANK METRIC SCORE	RUNNING ES	CORE ENRICHMENT
row_0	HMGB1	null	null	176	3.699057102203369	-0.013604044	No
row_1	GYS2	null	null	514	2.853959083557129	-0.050674055	No
row_2	NBN	null	null	714	2.585114002227783	-0.06763038	No
row_3	ABCA2	null	null	889	2.3566339015960693	-0.08094292	No
row_4	ALKBH1	null	null	989	2.267693042755127	-0.08332411	No
row_5	UVRAG	null	null	1183	2.086272954940796	-0.09940593	No
row_6	ATRX	null	null	1331	1.9666630029678345	-0.108783185	No
row_7	GCK	null	null	1385	1.9282050132751465	-0.104459815	No
row_8	LATS1	null	null	1439	1.8861429691314697	-0.100136444	No
row_9	PMS1	null	null	1497	1.8539589643478394	-0.09639607	No
row_10	FANCA	null	null	1940	1.6198760271072388	-0.14876997	No
row_11	XRCC2	null	null	2059	1.5623359680175781	-0.15392044	No
row_12	MYO6	null	null	2209	1.4949369430541992	-0.1635892	Yes
row_13	PCSK9	null	null	2281	1.463528037071228	-0.16188936	Yes
row_14	UPF1	null	null	2303	1.4560190439224243	-0.15290193	Yes
row_15	ADIPOR2	null	null	2311	1.453544020652771	-0.141874	Yes
row_16	HMGB2	null	null	2411	1.4180229902267456	-0.14425519	Yes
row_17	TOPORS	null	null	2479	1.3894269466400146	-0.14197235	Yes
row_18	TDG	null	null	2492	1.3830870389938354	-0.13167317	Yes
row_19	ABL1	null	null	2521	1.3727209568023682	-0.12370601	Yes
row_20	ERCC8	null	null	2574	1.3507519960403442	-0.119236894	Yes
row_21	EEF1E1	null	null	2594	1.3430310487747192	-0.10995797	Yes
row_22	SESN1	null	null	2854	1.255012035369873	-0.13565938	Yes
row_23	GSTM3	null	null	2918	1.2351640462875366	-0.13279352	Yes
row_24	REV1	null	null	2966	1.2190500497817993	-0.12759565	Yes
row_25	CDKN2D	null	null	3012	1.2076950073242188	-0.12210626	Yes
row_26	LIG4	null	null	3093	1.183182954788208	-0.121718176	Yes
row_27	LIG3	null	null	3115	1.1753100156784058	-0.112730764	Yes
row_28	RAD1	null	null	3124	1.1740119457244873	-0.10184858	Yes
row_29	RAD23B	null	null	3131	1.1727180480957031	-0.09067489	Yes
row_30	CEBPG	null	null	3197	1.1525139808654785	-0.08810054	Yes
row_31	GTF2H1	null	null	3212	1.1488289833068848	-0.078092866	Yes
row_32	UBE2A	null	null	3266	1.133208990097046	-0.073769495	Yes
row_33	DYRK2	null	null	3297	1.1273479461669922	-0.06609385	Yes
row_34	PMS2	null	null	3319	1.1204179525375366	-0.057106428	Yes
row_35	UBR5	null	null	3444	1.0852149724960327	-0.06313141	Yes
row_36	BLM	null	null	3589	1.0420010089874268	-0.0720714	Yes
row_37	FEN1	null	null	3632	1.0278840065002441	-0.06614477	Yes
row_38	APEX1	null	null	3646	1.026036024093628	-0.055991344	Yes
row_39	APC	null	null	3790	0.9847270250320435	-0.06478559	Yes
row_40	RPAIN	null	null	3839	0.9715160131454468	-0.059733465	Yes
row_41	STEAP2	null	null	3850	0.9682750105857849	-0.049142785	Yes
row_42	PML	null	null	3860	0.9674680233001709	-0.038406357	Yes
row_43	EIF2B1	null	null	3982	0.9348809719085693	-0.043994077	Yes
row_44	SETX	null	null	4019	0.926002025604248	-0.037192933	Yes
row_45	FOXN3	null	null	4161	0.8868119716644287	-0.04569568	Yes
row_46	ADIPOR1	null	null	4333	0.8484110236167908	-0.058570966	Yes
row_47	MNAT1	null	null	4356	0.8429319858551025	-0.049729303	Yes
row_48	RAD21	null	null	4426	0.8280680179595947	-0.047737956	Yes
row_49	SMC1A	null	null	4533	0.8008800148963928	-0.051139403	Yes
row_50	LATS2	null	null	4574	0.7916449904441833	-0.044921264	Yes
row_51	GCLC	null	null	4585	0.7900360226631165	-0.034330588	Yes
row_52	POLA1	null	null	4650	0.7763310074806213	-0.03161048	Yes
row_53	POLH	null	null	4685	0.7645580172538757	-0.024517834	Yes
row_54	UBE2B	null	null	4766	0.7467489838600159	-0.024129748	Yes
row_55	BRCA1	null	null	4870	0.7185990214347839	-0.027093945	Yes
row_56	BTG2	null	null	4908	0.70694500207901	-0.020438552	Yes
row_57	ME1	null	null	4983	0.6917359828948975	-0.01917596	Yes
row_58	CCNA2	null	null	5011	0.6853770017623901	-0.011063053	Yes
row_59	RINT1	null	null	5063	0.6729320287704468	-0.0064481795	Yes
row_60	XRCC6BP1	null	null	5139	0.6517819762229919	-0.0053313375	Yes
row_61	MSH3	null	null	5223	0.6331040263175964	-0.0053805066	Yes
row_62	RAD50	null	null	5246	0.6293889880180359	0.003461156	Yes
row_63	GATA3	null	null	5256	0.627174973487854	0.014197586	Yes
row_64	NCOA6	null	null	5292	0.6177099943161011	0.021144481	Yes
row_65	POLQ	null	null	5297	0.6169899702072144	0.032609668	Yes
row_66	ASF1A	null	null	5448	0.5847799777984619	0.02279516	Yes
row_67	EXO1	null	null	5481	0.5761860013008118	0.030179309	Yes
row_68	BCL6	null	null	5532	0.565837025642395	0.034939934	Yes
row_69	CDH13	null	null	5593	0.5526189804077148	0.038243044	Yes
row_70	ATM	null	null	5747	0.5155019760131836	0.027991282	Yes
row_71	XRCC4	null	null	5810	0.5020520091056824	0.031002892	Yes
row_72	BRCA2	null	null	5938	0.473488986492157	0.024540663	Yes
row_73	BRCC3	null	null	5963	0.46733200550079346	0.033090822	Yes
row_74	MRE11A	null	null	6057	0.44475099444389343	0.03158414	Yes
row_75	CLEC7A	null	null	6177	0.41485199332237244	0.026287924	Yes
row_76	RECQL	null	null	6226	0.40064001083374023	0.03134005	Yes
row_77	CD24	null	null	6269	0.3862450122833252	0.037266687	Yes
row_78	UBE2V2	null	null	6440	0.3413130044937134	0.024537152	Yes
row_79	UBE2N	null	null	6507	0.32011398673057556	0.026965756	Yes
row_80	ATXN3	null	null	6544	0.3100680112838745	0.0337669	Yes
row_81	RFC3	null	null	6571	0.30129098892211914	0.042025555	Yes
row_82	CALCR	null	null	6738	0.24360300600528717	0.029879026	Yes
