# Supplementary material for: Signatures of RNA binding proteins globally coupled to effective microRNA target sites
Source: HighWire-hosted journal article supplement (doi:10.1101/gr.103259.109), 2010-05-27
Supplement: Table_S13.zip [file RNA_POLYMERASE_II_TRANSCRIPTION_FACTOR_ACTIVITY.xls]

NAME	PROBE	GENE SYMBOL	GENE_TITLE	RANK IN GENE LIST	RANK METRIC SCORE	RUNNING ES	CORE ENRICHMENT
row_0	ZFHX3	null	null	5	3.699057102203369	0.010139852	Yes
row_1	ONECUT2	null	null	82	3.699057102203369	0.009917765	Yes
row_2	MED13	null	null	86	3.699057102203369	0.020349503	Yes
row_3	NKX2-8	null	null	95	3.699057102203369	0.030051526	Yes
row_4	HOXC13	null	null	105	3.699057102203369	0.039607607	Yes
row_5	UHRF1	null	null	144	3.699057102203369	0.044931345	Yes
row_6	CBFB	null	null	197	3.699057102203369	0.048211884	Yes
row_7	TBP	null	null	238	3.398026943206787	0.053243738	Yes
row_8	PROX1	null	null	241	3.398026943206787	0.06382142	Yes
row_9	ZNF148	null	null	301	3.398026943206787	0.06608036	Yes
row_10	PKNOX1	null	null	356	3.221935987472534	0.06906901	Yes
row_11	SOX9	null	null	481	2.9209060668945312	0.061841674	Yes
row_12	TCF7L2	null	null	538	2.853959083557129	0.06453844	Yes
row_13	FOXK2	null	null	550	2.7959671020507812	0.07380264	Yes
row_14	DEK	null	null	553	2.7959671020507812	0.08438032	Yes
row_15	GLIS3	null	null	569	2.7959671020507812	0.09306074	Yes
row_16	MYEF2	null	null	572	2.7959671020507812	0.103638425	Yes
row_17	MED26	null	null	629	2.699057102203369	0.10633519	Yes
row_18	SRF	null	null	656	2.6576640605926514	0.11341024	Yes
row_19	SOX12	null	null	724	2.552928924560547	0.11450164	Yes
row_20	MAF	null	null	764	2.522965908050537	0.119679436	Yes
row_21	EPAS1	null	null	847	2.4203031063079834	0.1185817	Yes
row_22	MED17	null	null	895	2.3566339015960693	0.12259195	Yes
row_23	MLL	null	null	945	2.3188459873199463	0.12631032	Yes
row_24	GABPA	null	null	1062	2.1805429458618164	0.12025052	Yes
row_25	ATF2	null	null	1106	2.142754077911377	0.12484455	Yes
row_26	TIAL1	null	null	1186	2.086272954940796	0.12418463	Yes
row_27	TMF1	null	null	1239	2.045844078063965	0.12746517	Yes
row_28	KLF5	null	null	1300	1.9914870262145996	0.12957817	Yes
row_29	SOX18	null	null	1370	1.9431819915771484	0.13037768	Yes
row_30	ZNF143	null	null	1420	1.9066649675369263	0.13409606	Yes
row_31	GTF2F2	null	null	1538	1.8298250436782837	0.12789032	Yes
row_32	MNX1	null	null	1574	1.8125660419464111	0.13365188	Yes
row_33	NR2F2	null	null	1583	1.8014299869537354	0.14335391	Yes
row_34	VEZF1	null	null	1631	1.7799789905548096	0.14736415	Yes
row_35	SOX30	null	null	1662	1.764557957649231	0.15385544	Yes
row_36	ERF	null	null	1720	1.7352689504623413	0.15640627	Yes
row_37	SREBF2	null	null	1732	1.7259290218353271	0.16567045	Yes
row_38	IRF4	null	null	1803	1.6904569864273071	0.16632403	Yes
row_39	MED1	null	null	1944	1.6162710189819336	0.1567616	Yes
row_40	MLLT1	null	null	2000	1.588467001914978	0.15960431	Yes
row_41	TEAD3	null	null	2095	1.5467690229415894	0.15675527	Yes
row_42	TCF15	null	null	2101	1.5467690229415894	0.1668951	Yes
row_43	LITAF	null	null	2140	1.5287950038909912	0.17221886	Yes
row_44	BRD8	null	null	2354	1.4366060495376587	0.1520026	No
row_45	ZNF281	null	null	2528	1.3727209568023682	0.13762407	No
row_46	MED4	null	null	2587	1.3468739986419678	0.14002895	No
row_47	PPARGC1A	null	null	2671	1.317039966583252	0.13878527	No
row_48	GMEB2	null	null	2679	1.3134510517120361	0.14863323	No
row_49	THRAP3	null	null	2805	1.2709219455718994	0.14125995	No
row_50	RXRA	null	null	2838	1.2597240209579468	0.14745934	No
row_51	CREG1	null	null	2884	1.244212031364441	0.15176149	No
row_52	NFIX	null	null	2942	1.2263000011444092	0.15431231	No
row_53	MED30	null	null	3008	1.209097981452942	0.1556956	No
row_54	SP2	null	null	3164	1.1624979972839355	0.14394403	No
row_55	NFRKB	null	null	3184	1.1574779748916626	0.15204068	No
row_56	GTF2H1	null	null	3212	1.1488289833068848	0.15896979	No
row_57	SNF8	null	null	3280	1.129683017730713	0.1600612	No
row_58	MEF2C	null	null	3376	1.1046639680862427	0.1570662	No
row_59	ATF6	null	null	3409	1.0948309898376465	0.16326559	No
row_60	NR5A2	null	null	3581	1.0439180135726929	0.14917894	No
row_61	GTF2A1L	null	null	3697	1.0097479820251465	0.14326508	No
row_62	NFYC	null	null	3776	0.9872499704360962	0.14275111	No
row_63	TCF7	null	null	3809	0.9797260165214539	0.1489505	No
row_64	MYF5	null	null	3955	0.9401450157165527	0.13865836	No
row_65	ASH1L	null	null	4070	0.9115960001945496	0.13289045	No
row_66	ZFPM2	null	null	4340	0.8477990031242371	0.10450141	No
row_67	HTATSF1	null	null	4369	0.8405200242996216	0.11128458	No
row_68	SMARCA5	null	null	4500	0.8131309747695923	0.10318158	No
row_69	PURA	null	null	4738	0.7526050209999084	0.07946271	No
row_70	NEUROD1	null	null	4867	0.7190529704093933	0.07165159	No
row_71	TCF12	null	null	4928	0.7025449872016907	0.07376459	No
row_72	PRDM4	null	null	5022	0.682440996170044	0.07106148	No
row_73	MED20	null	null	5107	0.659246027469635	0.06967185	No
row_74	CTCF	null	null	5463	0.5814539790153503	0.028731724	No
row_75	SP4	null	null	5485	0.5755320191383362	0.036536492	No
row_76	HMGN1	null	null	5490	0.574878990650177	0.046822283	No
row_77	MEIS2	null	null	5657	0.5344070196151733	0.03346535	No
row_78	TBX5	null	null	5681	0.5293819904327393	0.04097823	No
row_79	RUNX2	null	null	5701	0.5244160294532776	0.04907488	No
row_80	CNOT2	null	null	5713	0.5218089818954468	0.058339078	No
row_81	TCEAL1	null	null	5816	0.5009499788284302	0.054322477	No
row_82	TBX3	null	null	5887	0.4821000099182129	0.054976046	No
row_83	TCERG1	null	null	5947	0.4721989929676056	0.057234988	No
row_84	ISL1	null	null	6061	0.44402599334716797	0.051613018	No
row_85	ZNF345	null	null	6498	0.32302799820899963	-0.001148471	No
row_86	ELL2	null	null	6501	0.32156801223754883	0.009429209	No
row_87	TAF2	null	null	6520	0.3174000084400177	0.017671805	No
row_88	MED14	null	null	6556	0.30548200011253357	0.023433372	No
row_89	HIF1A	null	null	6741	0.24208399653434753	0.0074494644	No
row_90	NOTCH2	null	null	6786	0.22077900171279907	0.011897547	No
row_91	NFAT5	null	null	6871	0.16834500432014465	0.010507919	No
