# Supplementary material for: Signatures of RNA binding proteins globally coupled to effective microRNA target sites
Source: HighWire-hosted journal article supplement (doi:10.1101/gr.103259.109), 2010-05-27
Supplement: Table_S13.zip [file SANA_IFNG_ENDOTHELIAL_DN.xls]

NAME	PROBE	GENE SYMBOL	GENE_TITLE	RANK IN GENE LIST	RANK METRIC SCORE	RUNNING ES	CORE ENRICHMENT
row_0	FGFR1	null	null	294	3.398026943206787	-0.009189083	No
row_1	PIM3	null	null	1501	1.8539589643478394	-0.15028444	No
row_2	SLC25A3	null	null	2469	1.3937050104141235	-0.25681224	No
row_3	COTL1	null	null	2622	1.333569049835205	-0.2454633	No
row_4	CABLES1	null	null	3252	1.1379549503326416	-0.3031048	Yes
row_5	HDGF	null	null	3371	1.1057709455490112	-0.2868383	Yes
row_6	ODC1	null	null	3509	1.0655879974365234	-0.2733198	Yes
row_7	TPX2	null	null	3635	1.0278840065002441	-0.25806576	Yes
row_8	APEX1	null	null	3646	1.026036024093628	-0.22617875	Yes
row_9	APLN	null	null	3725	1.0009560585021973	-0.20412688	Yes
row_10	MGST3	null	null	3734	0.9983530044555664	-0.17195061	Yes
row_11	METTL9	null	null	4096	0.90317702293396	-0.19083017	Yes
row_12	EI24	null	null	4169	0.8861430287361145	-0.1679105	Yes
row_13	CTNNAL1	null	null	4189	0.8808310031890869	-0.13732521	Yes
row_14	H2AFZ	null	null	4331	0.8490239977836609	-0.12438528	Yes
row_15	HHIP	null	null	4359	0.8423280119895935	-0.09495706	Yes
row_16	ANGPTL2	null	null	4526	0.8047410249710083	-0.08563299	Yes
row_17	ANTXR1	null	null	4562	0.7954239845275879	-0.05736184	Yes
row_18	SMYD2	null	null	4877	0.7163329720497131	-0.069443606	Yes
row_19	C4ORF18	null	null	5037	0.6791099905967712	-0.05910709	Yes
row_20	MORF4L2	null	null	5581	0.5547940135002136	-0.10431006	Yes
row_21	EIF4G2	null	null	5652	0.5367910265922546	-0.08110111	Yes
row_22	TIMM17A	null	null	5927	0.4750419855117798	-0.08739751	Yes
row_23	DAB2	null	null	6168	0.4187059998512268	-0.08877635	Yes
row_24	KDELR2	null	null	6176	0.41485199332237244	-0.056455456	Yes
row_25	YWHAQ	null	null	6196	0.4108079969882965	-0.025870169	Yes
row_26	HDAC2	null	null	6408	0.34977900981903076	-0.023054624	Yes
row_27	GJA1	null	null	6656	0.2738490104675293	-0.025445906	Yes
row_28	TFRC	null	null	6719	0.2509689927101135	-0.0010798834	Yes
row_29	PRSS23	null	null	6793	0.2199140042066574	0.021695165	Yes
