# Supplementary material for: Signatures of RNA binding proteins globally coupled to effective microRNA target sites
Source: HighWire-hosted journal article supplement (doi:10.1101/gr.103259.109), 2010-05-27
Supplement: Table_S13.zip [file SPECIFIC_RNA_POLYMERASE_II_TRANSCRIPTION_FACTOR_ACTIVITY.xls]

NAME	PROBE	GENE SYMBOL	GENE_TITLE	RANK IN GENE LIST	RANK METRIC SCORE	RUNNING ES	CORE ENRICHMENT
row_0	PROX1	null	null	241	3.398026943206787	0.024032135	Yes
row_1	ZNF148	null	null	301	3.398026943206787	0.074338265	Yes
row_2	PKNOX1	null	null	356	3.221935987472534	0.12536621	Yes
row_3	SOX9	null	null	481	2.9209060668945312	0.16628878	Yes
row_4	DEK	null	null	553	2.7959671020507812	0.21486256	Yes
row_5	GLIS3	null	null	569	2.7959671020507812	0.27152064	Yes
row_6	ZNF143	null	null	1420	1.9066649675369263	0.20763594	Yes
row_7	NR2F2	null	null	1583	1.8014299869537354	0.24307272	Yes
row_8	VEZF1	null	null	1631	1.7799789905548096	0.2951112	Yes
row_9	ERF	null	null	1720	1.7352689504623413	0.3412308	Yes
row_10	BRD8	null	null	2354	1.4366060495376587	0.3086728	Yes
row_11	ZNF281	null	null	2528	1.3727209568023682	0.3425216	Yes
row_12	RXRA	null	null	2838	1.2597240209579468	0.35673708	Yes
row_13	NFRKB	null	null	3184	1.1574779748916626	0.3657555	Yes
row_14	MEIS2	null	null	5657	0.5344070196151733	0.06771457	No
row_15	ZNF345	null	null	6498	0.32302799820899963	0.0052734865	No
row_16	NOTCH2	null	null	6786	0.22077900171279907	0.022664938	No
