# Supplementary material for: Signatures of RNA binding proteins globally coupled to effective microRNA target sites
Source: HighWire-hosted journal article supplement (doi:10.1101/gr.103259.109), 2010-05-27
Supplement: Table_S13.zip [file ST_P38_MAPK_PATHWAY.xls]

NAME	PROBE	GENE SYMBOL	GENE_TITLE	RANK IN GENE LIST	RANK METRIC SCORE	RUNNING ES	CORE ENRICHMENT
row_0	NR2C2	null	null	4	3.699057102203369	0.05824608	Yes
row_1	CREB1	null	null	46	3.699057102203369	0.11115074	Yes
row_2	CREB5	null	null	47	3.699057102203369	0.16997427	Yes
row_3	MKNK2	null	null	336	3.221935987472534	0.18722136	Yes
row_4	IL1R1	null	null	522	2.853959083557129	0.2193378	Yes
row_5	MYEF2	null	null	572	2.7959671020507812	0.27108756	Yes
row_6	SRF	null	null	656	2.6576640605926514	0.317929	Yes
row_7	MAPK1	null	null	680	2.619875907897949	0.3734322	Yes
row_8	EEF2K	null	null	802	2.4686079025268555	0.41478783	Yes
row_9	ATF1	null	null	978	2.267693042755127	0.4483479	Yes
row_10	MAP2K3	null	null	1795	1.6990569829940796	0.3893715	No
row_11	NFKB1	null	null	1863	1.6616300344467163	0.43852276	No
row_12	MAPKAPK2	null	null	2899	1.2396639585494995	0.34793094	No
row_13	MKNK1	null	null	3392	1.1002659797668457	0.33572805	No
row_14	ELK1	null	null	3443	1.0852149724960327	0.38733345	No
row_15	MAP3K7IP2	null	null	4062	0.9144399762153625	0.35694087	No
row_16	CDC42	null	null	5767	0.5095670223236084	0.16977046	No
