# Supplementary material for: Signatures of RNA binding proteins globally coupled to effective microRNA target sites
Source: HighWire-hosted journal article supplement (doi:10.1101/gr.103259.109), 2010-05-27
Supplement: Table_S13.zip [file TAKEDA_NUP8_HOXA9_6H_UP.xls]

NAME	PROBE	GENE SYMBOL	GENE_TITLE	RANK IN GENE LIST	RANK METRIC SCORE	RUNNING ES	CORE ENRICHMENT
row_0	STK4	null	null	98	3.699057102203369	0.008017265	No
row_1	CALCRL	null	null	207	3.699057102203369	0.014585046	No
row_2	ITGB8	null	null	407	3.096997022628784	0.007962508	No
row_3	DLX2	null	null	628	2.699057102203369	-0.001703948	No
row_4	PLA2G4A	null	null	923	2.3373289108276367	-0.022096597	No
row_5	KLF5	null	null	1300	1.9914870262145996	-0.054375026	No
row_6	HOXA3	null	null	1338	1.9666630029678345	-0.0375159	No
row_7	CRIM1	null	null	1572	1.8125660419464111	-0.04906669	No
row_8	USP32	null	null	2387	1.4248989820480347	-0.14483258	No
row_9	PLN	null	null	2389	1.4248989820480347	-0.122755304	No
row_10	HOXC6	null	null	2532	1.3706769943237305	-0.121115774	No
row_11	ZNF503	null	null	2853	1.255012035369873	-0.14527708	No
row_12	SPRED1	null	null	3450	1.0841599702835083	-0.2094442	Yes
row_13	XCL2	null	null	3550	1.054618000984192	-0.20157188	Yes
row_14	PBX3	null	null	3597	1.0400919914245605	-0.18601729	Yes
row_15	SEMA3C	null	null	3638	1.02695894241333	-0.169593	Yes
row_16	FRMD6	null	null	3757	0.9931929707527161	-0.16447471	Yes
row_17	SLCO4C1	null	null	3909	0.9547640085220337	-0.16413972	Yes
row_18	SCML1	null	null	3971	0.936378002166748	-0.15075935	Yes
row_19	PCOLCE2	null	null	4208	0.8775429725646973	-0.16274498	Yes
row_20	OLFM3	null	null	4284	0.860837996006012	-0.1513939	Yes
row_21	P2RY5	null	null	4513	0.8097550272941589	-0.16221996	Yes
row_22	GLIPR1	null	null	4873	0.7181450128555298	-0.19203426	Yes
row_23	FLT3	null	null	4927	0.7025449872016907	-0.1774943	Yes
row_24	C4ORF18	null	null	5037	0.6791099905967712	-0.17107147	Yes
row_25	INPP4B	null	null	5047	0.6766279935836792	-0.15015379	Yes
row_26	HOXB3	null	null	5162	0.6459779739379883	-0.1444557	Yes
row_27	NRG4	null	null	5218	0.6342250108718872	-0.13020565	Yes
row_28	KMO	null	null	5353	0.6056349873542786	-0.12740652	Yes
row_29	P2RY12	null	null	5366	0.6021469831466675	-0.10692369	Yes
row_30	EVI1	null	null	5425	0.5888040065765381	-0.09310848	Yes
row_31	TOX	null	null	5602	0.549530029296875	-0.0963972	Yes
row_32	HPGD	null	null	5661	0.5332189798355103	-0.082582	Yes
row_33	EVI2A	null	null	5676	0.5299699902534485	-0.062389053	Yes
row_34	HOXA9	null	null	5720	0.5203679800033569	-0.046399616	Yes
row_35	CMAH	null	null	5950	0.47040000557899475	-0.05737061	Yes
row_36	TEX15	null	null	5988	0.45900699496269226	-0.04051148	Yes
row_37	CDH9	null	null	6110	0.4335319995880127	-0.035828035	Yes
row_38	GNAI1	null	null	6141	0.42466801404953003	-0.017954268	Yes
row_39	IGJ	null	null	6172	0.41643500328063965	-8.050125E-5	Yes
row_40	FKBP5	null	null	6207	0.4083549976348877	0.017213471	Yes
row_41	ADRBK2	null	null	6329	0.372516006231308	0.021896921	Yes
row_42	DACH1	null	null	6375	0.36020201444625854	0.037596457	Yes
row_43	FIGN	null	null	6603	0.2909870147705078	0.026915362	Yes
row_44	TSPAN12	null	null	6708	0.2557939887046814	0.034062937	Yes
