# Supplementary material for: Signatures of RNA binding proteins globally coupled to effective microRNA target sites
Source: HighWire-hosted journal article supplement (doi:10.1101/gr.103259.109), 2010-05-27
Supplement: Table_S13.zip [file TAKEDA_NUP8_HOXA9_8D_UP.xls]

NAME	PROBE	GENE SYMBOL	GENE_TITLE	RANK IN GENE LIST	RANK METRIC SCORE	RUNNING ES	CORE ENRICHMENT
row_0	SOX4	null	null	53	3.699057102203369	0.007218524	No
row_1	PTGS2	null	null	491	2.9209060668945312	-0.041401252	No
row_2	PRKAR2B	null	null	700	2.585114002227783	-0.056721624	No
row_3	FOXC1	null	null	772	2.494936943054199	-0.05212052	No
row_4	MTSS1	null	null	993	2.251899003982544	-0.06918584	No
row_5	CDH1	null	null	1017	2.236659049987793	-0.05760495	No
row_6	F2R	null	null	1155	2.107991933822632	-0.06260105	No
row_7	IFIT3	null	null	1185	2.086272954940796	-0.051892634	No
row_8	GCH1	null	null	1236	2.045844078063965	-0.044237874	No
row_9	HOXA3	null	null	1338	1.9666630029678345	-0.04399914	No
row_10	RAB27B	null	null	1360	1.9508689641952515	-0.03212742	No
row_11	OSBPL6	null	null	1441	1.8861429691314697	-0.028835028	No
row_12	DNAJC6	null	null	1979	1.6021469831466675	-0.09199603	No
row_13	MYCN	null	null	2018	1.581786036491394	-0.082596324	No
row_14	ALDH1A1	null	null	2212	1.4949369430541992	-0.09573551	No
row_15	SLC40A1	null	null	2262	1.468608021736145	-0.087935336	No
row_16	SPTA1	null	null	2360	1.4342390298843384	-0.08711495	No
row_17	GPR124	null	null	2548	1.3625969886779785	-0.09938167	No
row_18	BDNF	null	null	2701	1.3081220388412476	-0.106558956	No
row_19	ZNF503	null	null	2853	1.255012035369873	-0.11359083	No
row_20	MX2	null	null	2866	1.2503509521484375	-0.1004104	No
row_21	MEF2C	null	null	3376	1.1046639680862427	-0.15949987	No
row_22	REXO2	null	null	3480	1.0727159976959229	-0.15955195	No
row_23	TNFAIP6	null	null	3692	1.0115280151367188	-0.17530856	No
row_24	IFIH1	null	null	4045	0.9180200099945068	-0.2115683	No
row_25	RPS6KA5	null	null	4199	0.8788549900054932	-0.218891	Yes
row_26	OLFM3	null	null	4284	0.860837996006012	-0.21618025	Yes
row_27	GPR18	null	null	4348	0.8447510004043579	-0.21041586	Yes
row_28	ANGPT1	null	null	4387	0.8369250297546387	-0.20101614	Yes
row_29	ATP7B	null	null	4397	0.8345460295677185	-0.18739948	Yes
row_30	OAS2	null	null	4415	0.830411970615387	-0.17494611	Yes
row_31	THBS1	null	null	4423	0.8286529779434204	-0.16103862	Yes
row_32	MYH10	null	null	4430	0.8274840116500854	-0.14698572	Yes
row_33	TSLP	null	null	4586	0.7895010113716125	-0.15459925	Yes
row_34	PALLD	null	null	4589	0.7895010113716125	-0.1399647	Yes
row_35	IL22RA2	null	null	4918	0.7038609981536865	-0.17273454	Yes
row_36	FLT3	null	null	4927	0.7025449872016907	-0.15897247	Yes
row_37	NEGR1	null	null	4942	0.6999260187149048	-0.14608286	Yes
row_38	GDPD1	null	null	4951	0.6981890201568604	-0.13232079	Yes
row_39	MAP7	null	null	4959	0.6951659917831421	-0.11841331	Yes
row_40	CNKSR3	null	null	4990	0.6900309920310974	-0.1078503	Yes
row_41	RHAG	null	null	5033	0.6807730197906494	-0.09903224	Yes
row_42	DLC1	null	null	5048	0.6762160062789917	-0.08614264	Yes
row_43	MEIS1	null	null	5145	0.6502270102500916	-0.08517684	Yes
row_44	HOXB3	null	null	5162	0.6459779739379883	-0.072578065	Yes
row_45	RBPMS	null	null	5186	0.6410109996795654	-0.060997173	Yes
row_46	AMMECR1	null	null	5197	0.6391149759292603	-0.047525924	Yes
row_47	IFI44L	null	null	5259	0.6260719895362854	-0.0414707	Yes
row_48	EVI1	null	null	5425	0.5888040065765381	-0.050538346	Yes
row_49	TAL1	null	null	5476	0.5771690011024475	-0.042883582	Yes
row_50	GAD1	null	null	5638	0.5400919914245605	-0.05136958	Yes
row_51	HOXA9	null	null	5720	0.5203679800033569	-0.0482226	Yes
row_52	ABCB1	null	null	5852	0.4930410087108612	-0.05234623	Yes
row_53	SLC27A6	null	null	5915	0.4776430130004883	-0.046436418	Yes
row_54	IFIT2	null	null	6163	0.4193899929523468	-0.067427866	Yes
row_55	IGJ	null	null	6172	0.41643500328063965	-0.05366579	Yes
row_56	IFIT5	null	null	6180	0.41485199332237244	-0.039758306	Yes
row_57	DDX58	null	null	6237	0.39694198966026306	-0.032976016	Yes
row_58	NR4A2	null	null	6261	0.3877269923686981	-0.021395126	Yes
row_59	STAT1	null	null	6387	0.357028990983963	-0.024646284	Yes
row_60	CRISP3	null	null	6399	0.35309499502182007	-0.011320446	Yes
row_61	RSAD2	null	null	6433	0.34303098917007446	-0.0011936764	Yes
row_62	RXFP1	null	null	6485	0.3283590078353882	0.0063156723	Yes
row_63	GJA1	null	null	6656	0.2738490104675293	-0.0034790358	Yes
row_64	CALB1	null	null	6740	0.24208399653434753	-6.2287884E-4	Yes
row_65	PRSS23	null	null	6793	0.2199140042066574	0.0067410576	Yes
row_66	SPOCK1	null	null	6830	0.20490199327468872	0.01643159	Yes
