# Supplementary material for: Signatures of RNA binding proteins globally coupled to effective microRNA target sites
Source: HighWire-hosted journal article supplement (doi:10.1101/gr.103259.109), 2010-05-27
Supplement: Table_S13.zip [file TAKEDA_NUP8_HOXA9_10D_UP.xls]

NAME	PROBE	GENE SYMBOL	GENE_TITLE	RANK IN GENE LIST	RANK METRIC SCORE	RUNNING ES	CORE ENRICHMENT
row_0	SOX4	null	null	53	3.699057102203369	0.003899706	No
row_1	DBN1	null	null	128	3.699057102203369	0.004737295	No
row_2	CCR6	null	null	158	3.699057102203369	0.012136564	No
row_3	ADSSL1	null	null	234	3.398026943206787	0.012828338	No
row_4	MFAP3L	null	null	264	3.398026943206787	0.020227605	No
row_5	HMGCS1	null	null	393	3.096997022628784	0.013191179	No
row_6	DMD	null	null	484	2.9209060668945312	0.011695727	No
row_7	PTGS2	null	null	491	2.9209060668945312	0.022448743	No
row_8	ABLIM1	null	null	590	2.744813919067383	0.01978677	No
row_9	PRKAR2B	null	null	700	2.585114002227783	0.015520829	No
row_10	CDKN1C	null	null	751	2.522965908050537	0.01985798	No
row_11	CDH1	null	null	1017	2.236659049987793	-0.0071551166	No
row_12	DUSP4	null	null	1147	2.1192729473114014	-0.014337359	No
row_13	IFIT3	null	null	1185	2.086272954940796	-0.008104611	No
row_14	HOXA3	null	null	1338	1.9666630029678345	-0.0186406	No
row_15	RAB27B	null	null	1360	1.9508689641952515	-0.010074811	No
row_16	OSBPL6	null	null	1441	1.8861429691314697	-0.010112112	No
row_17	CAV1	null	null	1635	1.7799789905548096	-0.026626522	No
row_18	GMPR	null	null	1818	1.6862200498580933	-0.041536964	No
row_19	CXCL10	null	null	1971	1.6056350469589233	-0.052072953	No
row_20	DNAJC6	null	null	1979	1.6021469831466675	-0.04146575	No
row_21	EIF2AK2	null	null	1992	1.5918469429016113	-0.031587627	No
row_22	ALDH1A1	null	null	2212	1.4949369430541992	-0.05189323	No
row_23	GPR124	null	null	2548	1.3625969886779785	-0.089113384	No
row_24	CD1D	null	null	2657	1.3206590414047241	-0.09323351	No
row_25	GALNT12	null	null	2771	1.2824159860610962	-0.09808271	No
row_26	FN1	null	null	2821	1.2628940343856812	-0.093599744	No
row_27	ZNF503	null	null	2853	1.255012035369873	-0.08649211	No
row_28	MX2	null	null	2866	1.2503509521484375	-0.07661398	No
row_29	MED18	null	null	3585	1.0429589748382568	-0.16968133	No
row_30	EGLN3	null	null	3636	1.0278840065002441	-0.16534416	No
row_31	UST	null	null	3674	1.0187209844589233	-0.15911143	No
row_32	TNFAIP6	null	null	3692	1.0115280151367188	-0.14996237	No
row_33	IFIH1	null	null	4045	0.9180200099945068	-0.18966138	Yes
row_34	CFI	null	null	4106	0.900406002998352	-0.18678237	Yes
row_35	SAMD9	null	null	4154	0.8881530165672302	-0.18200779	Yes
row_36	OLFM3	null	null	4284	0.860837996006012	-0.18919003	Yes
row_37	FAM55C	null	null	4343	0.8459669947624207	-0.18601939	Yes
row_38	GPR18	null	null	4348	0.8447510004043579	-0.17497475	Yes
row_39	ANGPT1	null	null	4387	0.8369250297546387	-0.16888782	Yes
row_40	ATP10A	null	null	4404	0.8327699899673462	-0.15959296	Yes
row_41	OAS2	null	null	4415	0.830411970615387	-0.1494232	Yes
row_42	THBS1	null	null	4423	0.8286529779434204	-0.138816	Yes
row_43	TSLP	null	null	4586	0.7895010113716125	-0.15081014	Yes
row_44	PALLD	null	null	4589	0.7895010113716125	-0.13947386	Yes
row_45	MCOLN2	null	null	4666	0.7706609964370728	-0.1389279	Yes
row_46	IL22RA2	null	null	4918	0.7038609981536865	-0.16389959	Yes
row_47	FLT3	null	null	4927	0.7025449872016907	-0.1534382	Yes
row_48	NEGR1	null	null	4942	0.6999260187149048	-0.1438517	Yes
row_49	TACSTD1	null	null	4960	0.6951659917831421	-0.13470265	Yes
row_50	INPP4B	null	null	5047	0.6766279935836792	-0.13561484	Yes
row_51	DLC1	null	null	5048	0.6762160062789917	-0.12398694	Yes
row_52	MEIS1	null	null	5145	0.6502270102500916	-0.12635729	Yes
row_53	HOXB3	null	null	5162	0.6459779739379883	-0.11706242	Yes
row_54	RBPMS	null	null	5186	0.6410109996795654	-0.10878826	Yes
row_55	ARHGAP5	null	null	5198	0.6387370228767395	-0.098764315	Yes
row_56	C15ORF48	null	null	5219	0.6342250108718872	-0.09005272	Yes
row_57	IFI44L	null	null	5259	0.6260719895362854	-0.08411159	Yes
row_58	SERPINE2	null	null	5377	0.6000670194625854	-0.08954406	Yes
row_59	IL15	null	null	5397	0.5962799787521362	-0.080686636	Yes
row_60	SLC8A1	null	null	5417	0.5915079712867737	-0.071829215	Yes
row_61	TM4SF1	null	null	5514	0.5700119733810425	-0.07419956	Yes
row_62	PCDH20	null	null	5535	0.5651990175247192	-0.06548796	Yes
row_63	TOX	null	null	5602	0.549530029296875	-0.06348385	Yes
row_64	HPGD	null	null	5661	0.5332189798355103	-0.060313214	Yes
row_65	HOXA9	null	null	5720	0.5203679800033569	-0.057142586	Yes
row_66	SAMD9L	null	null	5749	0.5152180194854736	-0.0495975	Yes
row_67	SLC27A6	null	null	5915	0.4776430130004883	-0.062029086	Yes
row_68	GNAI1	null	null	6141	0.42466801404953003	-0.08320958	Yes
row_69	IFIT2	null	null	6163	0.4193899929523468	-0.07464379	Yes
row_70	IGJ	null	null	6172	0.41643500328063965	-0.0641824	Yes
row_71	DDX58	null	null	6237	0.39694198966026306	-0.061886664	Yes
row_72	NR4A2	null	null	6261	0.3877269923686981	-0.053612504	Yes
row_73	GEM	null	null	6314	0.37539198994636536	-0.049566984	Yes
row_74	STAT1	null	null	6387	0.357028990983963	-0.048437763	Yes
row_75	GATM	null	null	6410	0.34919700026512146	-0.04001779	Yes
row_76	RSAD2	null	null	6433	0.34303098917007446	-0.031597815	Yes
row_77	KIT	null	null	6479	0.3298409879207611	-0.026531588	Yes
row_78	NEXN	null	null	6486	0.32725000381469727	-0.015778571	Yes
row_79	CDC42EP3	null	null	6500	0.32229700684547424	-0.006046261	Yes
row_80	AFF3	null	null	6697	0.2605150043964386	-0.022998115	Yes
row_81	CALB1	null	null	6740	0.24208399653434753	-0.017494444	Yes
row_82	BTLA	null	null	6825	0.20671600103378296	-0.018115005	Yes
row_83	SPOCK1	null	null	6830	0.20490199327468872	-0.007070359	Yes
row_84	STS	null	null	6831	0.20420700311660767	0.004557548	Yes
row_85	ZNF711	null	null	6840	0.19786100089550018	0.015018934	Yes
