# Supplementary material for: Signatures of RNA binding proteins globally coupled to effective microRNA target sites
Source: HighWire-hosted journal article supplement (doi:10.1101/gr.103259.109), 2010-05-27
Supplement: Table_S13.zip [file TRANSCRIPTION_FROM_RNA_POLYMERASE_II_PROMOTER.xls]

NAME	PROBE	GENE SYMBOL	GENE_TITLE	RANK IN GENE LIST	RANK METRIC SCORE	RUNNING ES	CORE ENRICHMENT
row_0	ZFHX3	null	null	5	3.699057102203369	0.0034208435	Yes
row_1	CREB5	null	null	47	3.699057102203369	0.0014717584	Yes
row_2	MED13	null	null	86	3.699057102203369	-2.9832765E-5	Yes
row_3	TFAP2B	null	null	87	3.699057102203369	0.0041368343	Yes
row_4	NKX2-8	null	null	95	3.699057102203369	0.0072593484	Yes
row_5	PPARA	null	null	129	3.699057102203369	0.0065035806	Yes
row_6	UHRF1	null	null	144	3.699057102203369	0.008581942	Yes
row_7	HMGB1	null	null	176	3.699057102203369	0.008124503	Yes
row_8	CBFB	null	null	197	3.699057102203369	0.009307877	Yes
row_9	NEUROD2	null	null	218	3.398026943206787	0.01049125	Yes
row_10	TBP	null	null	238	3.398026943206787	0.011823788	Yes
row_11	ZNF148	null	null	301	3.398026943206787	0.0067422446	Yes
row_12	KLF9	null	null	327	3.221935987472534	0.0071797944	Yes
row_13	MED23	null	null	344	3.221935987472534	0.008959826	Yes
row_14	FOSL2	null	null	365	3.221935987472534	0.010143199	Yes
row_15	ZMYND11	null	null	404	3.096997022628784	0.008641608	Yes
row_16	MXD4	null	null	409	3.096997022628784	0.012211616	Yes
row_17	PLAGL1	null	null	411	3.096997022628784	0.01622912	Yes
row_18	AFF4	null	null	436	3.000087022781372	0.016815834	Yes
row_19	SMAD3	null	null	444	3.000087022781372	0.019938348	Yes
row_20	ELP4	null	null	519	2.853959083557129	0.013066827	Yes
row_21	HCFC1	null	null	533	2.853959083557129	0.0152943535	Yes
row_22	TCF7L2	null	null	538	2.853959083557129	0.018864362	Yes
row_23	FOXK2	null	null	550	2.7959671020507812	0.021390216	Yes
row_24	SMARCAL1	null	null	551	2.7959671020507812	0.025556885	Yes
row_25	DEK	null	null	553	2.7959671020507812	0.029574387	Yes
row_26	GLIS3	null	null	569	2.7959671020507812	0.031503584	Yes
row_27	MYEF2	null	null	572	2.7959671020507812	0.035371922	Yes
row_28	KLF12	null	null	573	2.7959671020507812	0.03953859	Yes
row_29	SNAI2	null	null	598	2.744813919067383	0.040125303	Yes
row_30	MED26	null	null	629	2.699057102203369	0.039817028	Yes
row_31	FOXD3	null	null	653	2.6576640605926514	0.040552907	Yes
row_32	SMARCC2	null	null	709	2.585114002227783	0.036515515	Yes
row_33	SOX12	null	null	724	2.552928924560547	0.038593877	Yes
row_34	BMP6	null	null	755	2.522965908050537	0.038285606	Yes
row_35	NRIP1	null	null	761	2.522965908050537	0.041706447	Yes
row_36	MAF	null	null	764	2.522965908050537	0.045574784	Yes
row_37	NCOR1	null	null	782	2.494936943054199	0.047205653	Yes
row_38	RYBP	null	null	789	2.494936943054199	0.05047733	Yes
row_39	SQSTM1	null	null	797	2.4686079025268555	0.053599846	Yes
row_40	HOXD13	null	null	833	2.44378399848938	0.05254575	Yes
row_41	EPAS1	null	null	847	2.4203031063079834	0.054773275	Yes
row_42	ABCA2	null	null	889	2.3566339015960693	0.052824188	Yes
row_43	MED17	null	null	895	2.3566339015960693	0.056245033	Yes
row_44	HSF2	null	null	900	2.3566339015960693	0.05981504	Yes
row_45	JARID1A	null	null	905	2.3566339015960693	0.06338505	Yes
row_46	MLL	null	null	945	2.3188459873199463	0.061734293	Yes
row_47	MBD1	null	null	947	2.301116943359375	0.0657518	Yes
row_48	POLR2D	null	null	1067	2.1805429458618164	0.052167866	Yes
row_49	ELF5	null	null	1088	2.154989004135132	0.05335124	Yes
row_50	TIAL1	null	null	1186	2.086272954940796	0.04304893	Yes
row_51	NR6A1	null	null	1200	2.075808048248291	0.045276456	Yes
row_52	TMF1	null	null	1239	2.045844078063965	0.043774866	Yes
row_53	SMARCB1	null	null	1242	2.045844078063965	0.047643203	Yes
row_54	IKZF3	null	null	1278	2.0178160667419434	0.046589106	Yes
row_55	MAX	null	null	1288	2.0088610649108887	0.04941329	Yes
row_56	KLF5	null	null	1300	1.9914870262145996	0.051939145	Yes
row_57	ZNF238	null	null	1363	1.9508689641952515	0.046857603	Yes
row_58	SOX18	null	null	1370	1.9431819915771484	0.05012928	Yes
row_59	ZNF143	null	null	1420	1.9066649675369263	0.046986878	Yes
row_60	STAT2	null	null	1422	1.9066649675369263	0.05100438	Yes
row_61	PAWR	null	null	1424	1.8997160196304321	0.055021882	Yes
row_62	MECP2	null	null	1452	1.8795130252838135	0.055161104	Yes
row_63	UBP1	null	null	1467	1.8729820251464844	0.057239465	Yes
row_64	HNF4G	null	null	1498	1.8539589643478394	0.05693119	Yes
row_65	GTF2F2	null	null	1538	1.8298250436782837	0.055280436	Yes
row_66	MNX1	null	null	1574	1.8125660419464111	0.05422634	Yes
row_67	NR2F2	null	null	1583	1.8014299869537354	0.057199687	Yes
row_68	VEZF1	null	null	1631	1.7799789905548096	0.054355614	Yes
row_69	KCNIP3	null	null	1656	1.769637942314148	0.05494233	Yes
row_70	TNFRSF1A	null	null	1661	1.764557957649231	0.058512338	Yes
row_71	SOX30	null	null	1662	1.764557957649231	0.06267901	Yes
row_72	NPAS2	null	null	1678	1.7595380544662476	0.0646082	Yes
row_73	YBX1	null	null	1679	1.7595380544662476	0.068774864	Yes
row_74	MAZ	null	null	1682	1.7595380544662476	0.072643206	Yes
row_75	ERF	null	null	1720	1.7352689504623413	0.071290776	Yes
row_76	TWIST1	null	null	1727	1.7305740118026733	0.07456246	Yes
row_77	SREBF2	null	null	1732	1.7259290218353271	0.078132465	Yes
row_78	FUBP1	null	null	1763	1.7167860269546509	0.07782419	Yes
row_79	RUVBL1	null	null	1829	1.6820240020751953	0.07229515	Yes
row_80	DTX1	null	null	1843	1.6737509965896606	0.07452268	Yes
row_81	ARID4A	null	null	1851	1.669672966003418	0.0776452	Yes
row_82	NFKB1	null	null	1863	1.6616300344467163	0.08017105	Yes
row_83	STAT3	null	null	1897	1.642151951789856	0.079415284	Yes
row_84	MED1	null	null	1944	1.6162710189819336	0.07672037	Yes
row_85	NRF1	null	null	1955	1.6126970052719116	0.07939539	Yes
row_86	MLLT1	null	null	2000	1.588467001914978	0.076998815	Yes
row_87	MYCN	null	null	2018	1.581786036491394	0.07862968	Yes
row_88	SKIL	null	null	2051	1.571951985359192	0.078023076	Yes
row_89	TCF15	null	null	2101	1.5467690229415894	0.074880674	Yes
row_90	LITAF	null	null	2140	1.5287950038909912	0.073379084	Yes
row_91	SOX5	null	null	2169	1.5143649578094482	0.07336914	Yes
row_92	LRRFIP1	null	null	2186	1.5059319734573364	0.07514917	Yes
row_93	TCEB3	null	null	2189	1.5059319734573364	0.07901751	Yes
row_94	MYO6	null	null	2209	1.4949369430541992	0.08035005	Yes
row_95	SP1	null	null	2229	1.486868977546692	0.081682585	Yes
row_96	TCFL5	null	null	2265	1.468608021736145	0.08062849	Yes
row_97	CDX2	null	null	2316	1.453544020652771	0.07733692	Yes
row_98	BRD8	null	null	2354	1.4366060495376587	0.07598449	Yes
row_99	EID1	null	null	2362	1.4342390298843384	0.07910701	Yes
row_100	HMGB2	null	null	2411	1.4180229902267456	0.07611377	Yes
row_101	SAP18	null	null	2416	1.4157559871673584	0.07968378	Yes
row_102	HIRA	null	null	2457	1.398026943206787	0.07788386	Yes
row_103	ZMIZ2	null	null	2471	1.3915610313415527	0.080111384	Yes
row_104	ABL1	null	null	2521	1.3727209568023682	0.07696898	Yes
row_105	ZNF281	null	null	2528	1.3727209568023682	0.08024066	Yes
row_106	HOXC6	null	null	2532	1.3706769943237305	0.08395983	Yes
row_107	DR1	null	null	2564	1.3566340208053589	0.0835024	Yes
row_108	MKL2	null	null	2578	1.3507519960403442	0.08572992	Yes
row_109	MED4	null	null	2587	1.3468739986419678	0.088703275	Yes
row_110	ECD	null	null	2616	1.3354450464248657	0.08869333	Yes
row_111	THRA	null	null	2642	1.3279889822006226	0.08913088	Yes
row_112	CITED2	null	null	2647	1.32430899143219	0.092700884	Yes
row_113	PPARGC1A	null	null	2671	1.317039966583252	0.09343676	Yes
row_114	GMEB2	null	null	2679	1.3134510517120361	0.09655928	Yes
row_115	NFATC3	null	null	2748	1.2891240119934082	0.09058274	Yes
row_116	FOXO3	null	null	2778	1.279101014137268	0.090423636	Yes
row_117	THRAP3	null	null	2805	1.2709219455718994	0.090712026	Yes
row_118	MYC	null	null	2825	1.2628940343856812	0.09204456	Yes
row_119	RXRA	null	null	2838	1.2597240209579468	0.09442125	Yes
row_120	CREG1	null	null	2884	1.244212031364441	0.09187551	Yes
row_121	ZFP161	null	null	2902	1.2396639585494995	0.09350637	Yes
row_122	PAX3	null	null	2921	1.2336740493774414	0.09498808	Yes
row_123	NFIX	null	null	2942	1.2263000011444092	0.09617145	Yes
row_124	CRTC1	null	null	2998	1.2119179964065552	0.09213406	Yes
row_125	MED30	null	null	3008	1.209097981452942	0.094958246	Yes
row_126	FOXO4	null	null	3025	1.2035130262374878	0.09673828	Yes
row_127	TRAK1	null	null	3136	1.1714270114898682	0.084496826	Yes
row_128	SP2	null	null	3164	1.1624979972839355	0.08463605	Yes
row_129	NFRKB	null	null	3184	1.1574779748916626	0.085968584	Yes
row_130	POLR2C	null	null	3189	1.1562310457229614	0.0895386	Yes
row_131	CEBPG	null	null	3197	1.1525139808654785	0.09266111	Yes
row_132	NR3C1	null	null	3202	1.1512819528579712	0.09623112	Yes
row_133	GTF2H1	null	null	3212	1.1488289833068848	0.099055305	Yes
row_134	GATA2	null	null	3228	1.1451740264892578	0.1009845	Yes
row_135	VHL	null	null	3239	1.1427539587020874	0.10365952	Yes
row_136	SNF8	null	null	3280	1.129683017730713	0.1018596	No
row_137	TRPS1	null	null	3324	1.1192729473114014	0.099612184	No
row_138	TFAP2A	null	null	3328	1.1181319952011108	0.10333136	No
row_139	ATF6	null	null	3409	1.0948309898376465	0.09556485	No
row_140	ELK1	null	null	3443	1.0852149724960327	0.09480908	No
row_141	TCEB3B	null	null	3451	1.082056999206543	0.09793159	No
row_142	DNMT1	null	null	3541	1.057582974433899	0.0888226	No
row_143	NUFIP1	null	null	3559	1.0526529550552368	0.090453476	No
row_144	NR5A2	null	null	3581	1.0439180135726929	0.09148768	No
row_145	PBX3	null	null	3597	1.0400919914245605	0.09341688	No
row_146	RUNX3	null	null	3603	1.0381909608840942	0.09683772	No
row_147	APEX1	null	null	3646	1.026036024093628	0.094739474	No
row_148	HLF	null	null	3673	1.0187209844589233	0.09502786	No
row_149	RB1	null	null	3686	1.0142110586166382	0.09740455	No
row_150	NFYC	null	null	3776	0.9872499704360962	0.08829556	No
row_151	UBN1	null	null	3781	0.9864069819450378	0.09186556	No
row_152	SMAD2	null	null	3807	0.98055499792099	0.09230311	No
row_153	TCF7	null	null	3809	0.9797260165214539	0.096320614	No
row_154	SNW1	null	null	3869	0.9650580286979675	0.09168657	No
row_155	FOXO1	null	null	3889	0.9586939811706543	0.093019105	No
row_156	IKBKAP	null	null	3895	0.9579049944877625	0.09643995	No
row_157	RNF14	null	null	3933	0.9462400078773499	0.09508752	No
row_158	MYF5	null	null	3955	0.9401450157165527	0.09612173	No
row_159	POU2AF1	null	null	3998	0.9311590194702148	0.09402348	No
row_160	ASH1L	null	null	4070	0.9115960001945496	0.08759946	No
row_161	E2F3	null	null	4076	0.910181999206543	0.0910203	No
row_162	TCF19	null	null	4171	0.8861430287361145	0.081165485	No
row_163	MDM2	null	null	4206	0.8775429725646973	0.08026055	No
row_164	ELF2	null	null	4235	0.8703969717025757	0.080250606	No
row_165	ZFPM2	null	null	4340	0.8477990031242371	0.06890415	No
row_166	MNAT1	null	null	4356	0.8429319858551025	0.07083335	No
row_167	HTATSF1	null	null	4369	0.8405200242996216	0.07321004	No
row_168	GFI1	null	null	4431	0.8269010186195374	0.06827766	No
row_169	KLF11	null	null	4448	0.8251550197601318	0.07005769	No
row_170	RNF4	null	null	4458	0.8228390216827393	0.07288188	No
row_171	CCNK	null	null	4472	0.8211100101470947	0.0751094	No
row_172	CHD1	null	null	4491	0.8159629702568054	0.076591104	No
row_173	SMARCA5	null	null	4500	0.8131309747695923	0.07956445	No
row_174	MYF6	null	null	4578	0.7911080121994019	0.07224544	No
row_175	BRIP1	null	null	4584	0.7900360226631165	0.07566628	No
row_176	POLR2B	null	null	4699	0.7615389823913574	0.062828176	No
row_177	COPS2	null	null	4724	0.7550680041313171	0.06341489	No
row_178	ZNF254	null	null	4732	0.7535880208015442	0.0665374	No
row_179	ARNTL	null	null	4737	0.7526050209999084	0.07010741	No
row_180	TRIM24	null	null	4762	0.7482050061225891	0.070694126	No
row_181	PHF21A	null	null	4863	0.7204200029373169	0.059944324	No
row_182	BRCA1	null	null	4870	0.7185990214347839	0.063216	No
row_183	TCF12	null	null	4928	0.7025449872016907	0.058880284	No
row_184	CDK7	null	null	4949	0.6981890201568604	0.060063656	No
row_185	PRDM4	null	null	5022	0.682440996170044	0.053490467	No
row_186	MAML2	null	null	5031	0.6807730197906494	0.056463815	No
row_187	TARBP1	null	null	5085	0.6652309894561768	0.052724753	No
row_188	MED20	null	null	5107	0.659246027469635	0.053758964	No
row_189	CHD2	null	null	5113	0.6572700142860413	0.057179805	No
row_190	BPTF	null	null	5118	0.6564810276031494	0.060749814	No
row_191	TRIP13	null	null	5136	0.6525620222091675	0.062380683	No
row_192	NFE2L3	null	null	5193	0.6394929885864258	0.058194127	No
row_193	ZEB1	null	null	5200	0.638359010219574	0.061465804	No
row_194	TFDP1	null	null	5235	0.6308709979057312	0.06056087	No
row_195	TGIF1	null	null	5250	0.628279983997345	0.06263924	No
row_196	GATA3	null	null	5256	0.627174973487854	0.06606008	No
row_197	POU1F1	null	null	5261	0.6253389716148376	0.06963009	No
row_198	NCOA6	null	null	5292	0.6177099943161011	0.06932181	No
row_199	JAZF1	null	null	5348	0.6059859991073608	0.06528442	No
row_200	ATF7IP	null	null	5378	0.5997220277786255	0.06512531	No
row_201	CTCF	null	null	5463	0.5814539790153503	0.056762144	No
row_202	SP4	null	null	5485	0.5755320191383362	0.057796355	No
row_203	HDAC8	null	null	5492	0.574226975440979	0.061068032	No
row_204	ZNF189	null	null	5531	0.5664770007133484	0.059566442	No
row_205	BCL6	null	null	5532	0.565837025642395	0.06373311	No
row_206	MEIS2	null	null	5657	0.5344070196151733	0.049403355	No
row_207	TAF5	null	null	5689	0.5273299813270569	0.048945915	No
row_208	TFAP2C	null	null	5709	0.5226759910583496	0.050278455	No
row_209	PRKAR1A	null	null	5736	0.517212986946106	0.05056684	No
row_210	POU4F1	null	null	5764	0.5101280212402344	0.05070606	No
row_211	TCEAL1	null	null	5816	0.5009499788284302	0.04726533	No
row_212	EPC1	null	null	5826	0.49875399470329285	0.050089512	No
row_213	SMARCC1	null	null	5861	0.4911530017852783	0.04918458	No
row_214	TBX3	null	null	5887	0.4821000099182129	0.04962213	No
row_215	CIAO1	null	null	5936	0.47374799847602844	0.046628892	No
row_216	TCERG1	null	null	5947	0.4721989929676056	0.04930391	No
row_217	E2F6	null	null	6126	0.42954400181770325	0.026919266	No
row_218	YY1	null	null	6161	0.41961801052093506	0.026014334	No
row_219	RREB1	null	null	6162	0.41961801052093506	0.030181	No
row_220	BLZF1	null	null	6178	0.41485199332237244	0.032110196	No
row_221	SNAPC3	null	null	6219	0.40481099486351013	0.030310277	No
row_222	ETV1	null	null	6252	0.3924170136451721	0.029703673	No
row_223	HEXIM1	null	null	6337	0.3704729974269867	0.021340506	No
row_224	STAT1	null	null	6387	0.357028990983963	0.018198105	No
row_225	ZNF345	null	null	6498	0.32302799820899963	0.005956656	No
row_226	ELL2	null	null	6501	0.32156801223754883	0.009824993	No
row_227	TAF2	null	null	6520	0.3174000084400177	0.011306696	No
row_228	POU4F2	null	null	6552	0.3077690005302429	0.010849258	No
row_229	MED14	null	null	6556	0.30548200011253357	0.01456843	No
row_230	ID4	null	null	6600	0.2923460006713867	0.012321016	No
row_231	MTF1	null	null	6642	0.2781110107898712	0.010371931	No
row_232	TAF5L	null	null	6715	0.25329700112342834	0.0037987407	No
row_233	HIF1A	null	null	6741	0.24208399653434753	0.00423629	No
row_234	PRDM1	null	null	6801	0.21632599830627441	-3.9775902E-4	No
row_235	TARDBP	null	null	6819	0.2088170051574707	0.0012331082	No
row_236	ELF1	null	null	6820	0.2085369974374771	0.005399775	No
row_237	NFAT5	null	null	6871	0.16834500432014465	0.002108208	No
row_238	CCNT2	null	null	6901	0.14675399661064148	0.0019490989	No
row_239	ZBTB38	null	null	6906	0.13735899329185486	0.005519107	No
