# Supplementary material for: Signatures of RNA binding proteins globally coupled to effective microRNA target sites
Source: HighWire-hosted journal article supplement (doi:10.1101/gr.103259.109), 2010-05-27
Supplement: Table_S13.zip [file TRANSITION_METAL_ION_BINDING.xls]

NAME	PROBE	GENE SYMBOL	GENE_TITLE	RANK IN GENE LIST	RANK METRIC SCORE	RUNNING ES	CORE ENRICHMENT
row_0	LIMD1	null	null	492	2.9209060668945312	-0.047474165	No
row_1	BIRC5	null	null	1037	2.2076950073242188	-0.10248238	No
row_2	MSRB2	null	null	1271	2.0178160667419434	-0.11243118	No
row_3	MYNN	null	null	1760	1.7167860269546509	-0.15932581	No
row_4	SIAH1	null	null	1881	1.6537339687347412	-0.15290256	No
row_5	FECH	null	null	2223	1.489542007446289	-0.178499	No
row_6	ABL1	null	null	2521	1.3727209568023682	-0.19772048	No
row_7	DYRK2	null	null	3297	1.1273479461669922	-0.28619725	Yes
row_8	MMP16	null	null	3304	1.125025987625122	-0.26325706	Yes
row_9	TRPS1	null	null	3324	1.1192729473114014	-0.24220034	Yes
row_10	SLU7	null	null	3573	1.0477789640426636	-0.25432244	Yes
row_11	LTA4H	null	null	3846	0.9698920249938965	-0.26992178	Yes
row_12	RNF11	null	null	3928	0.9477779865264893	-0.257848	Yes
row_13	MMP13	null	null	4135	0.8921989798545837	-0.26388487	Yes
row_14	MDM2	null	null	4206	0.8775429725646973	-0.25021735	Yes
row_15	ZFPM2	null	null	4340	0.8477990031242371	-0.2456776	Yes
row_16	MNAT1	null	null	4356	0.8429319858551025	-0.22404136	Yes
row_17	TYR	null	null	4379	0.8381199836730957	-0.20341933	Yes
row_18	ATP7B	null	null	4397	0.8345460295677185	-0.18207285	Yes
row_19	RNF4	null	null	4458	0.8228390216827393	-0.16695645	Yes
row_20	LNPEP	null	null	4498	0.8148279786109924	-0.14879747	Yes
row_21	CBLB	null	null	4597	0.7884320020675659	-0.13918673	Yes
row_22	TIMM9	null	null	4618	0.7836570143699646	-0.11827492	Yes
row_23	ATP7A	null	null	4786	0.7419289946556091	-0.11866128	Yes
row_24	BRCA1	null	null	4870	0.7185990214347839	-0.10687725	Yes
row_25	ME1	null	null	4983	0.6917359828948975	-0.099294916	Yes
row_26	FDX1	null	null	4996	0.6879090070724487	-0.077224016	Yes
row_27	PRDM4	null	null	5022	0.682440996170044	-0.05703663	Yes
row_28	ABL2	null	null	5075	0.6680529713630676	-0.040761154	Yes
row_29	CA12	null	null	5165	0.6455940008163452	-0.029846443	Yes
row_30	ZNF185	null	null	5173	0.6436790227890015	-0.007051118	Yes
row_31	ZEB1	null	null	5200	0.638359010219574	0.012991382	Yes
row_32	CTCF	null	null	5463	0.5814539790153503	-0.0011591073	Yes
row_33	RABIF	null	null	5759	0.5121009945869446	-0.02009082	Yes
row_34	PEX12	null	null	5898	0.4802590012550354	-0.0162755	Yes
row_35	CA2	null	null	6012	0.45403799414634705	-0.008838044	Yes
row_36	YY1	null	null	6161	0.41961801052093506	-0.00647158	Yes
row_37	ZNF146	null	null	6236	0.39737600088119507	0.0066164136	Yes
row_38	GDA	null	null	6395	0.35407501459121704	0.0075340215	Yes
row_39	MSRB3	null	null	6508	0.31975099444389343	0.015116365	Yes
row_40	ADH1B	null	null	6753	0.23411999642848969	0.003573815	Yes
row_41	EEA1	null	null	6926	0.113257996737957	0.0024630253	Yes
