# Supplementary material for: Signatures of RNA binding proteins globally coupled to effective microRNA target sites
Source: HighWire-hosted journal article supplement (doi:10.1101/gr.103259.109), 2010-05-27
Supplement: Table_S13.zip [file UVB_NHEK3_C7.xls]

NAME	PROBE	GENE SYMBOL	GENE_TITLE	RANK IN GENE LIST	RANK METRIC SCORE	RUNNING ES	CORE ENRICHMENT
row_0	HMGB1	null	null	176	3.699057102203369	0.037095845	Yes
row_1	PAM	null	null	262	3.398026943206787	0.08732679	Yes
row_2	CTSC	null	null	315	3.398026943206787	0.14232102	Yes
row_3	PLA2G4A	null	null	923	2.3373289108276367	0.117205545	Yes
row_4	ACSL1	null	null	1006	2.236659049987793	0.16786952	Yes
row_5	IDH2	null	null	1312	1.9830540418624878	0.18634526	Yes
row_6	PGD	null	null	1834	1.6778680086135864	0.17364319	Yes
row_7	ATIC	null	null	2464	1.3937050104141235	0.1453522	Yes
row_8	CDC20	null	null	2582	1.348809003829956	0.1909642	Yes
row_9	UBE2C	null	null	2807	1.2693049907684326	0.22113164	Yes
row_10	EXOSC7	null	null	2872	1.2488080263137817	0.27439377	Yes
row_11	VSNL1	null	null	2875	1.2472699880599976	0.33660507	Yes
row_12	LIF	null	null	3224	1.1463890075683594	0.34887415	Yes
row_13	ITGB1	null	null	3787	0.9847270250320435	0.33025405	Yes
row_14	MALL	null	null	3873	0.964257001876831	0.380485	Yes
row_15	SRD5A1	null	null	5205	0.6372280120849609	0.25086606	No
