# Supplementary material for: Signatures of RNA binding proteins globally coupled to effective microRNA target sites
Source: HighWire-hosted journal article supplement (doi:10.1101/gr.103259.109), 2010-05-27
Supplement: Table_S13.zip [file UVB_SCC_UP.xls]

NAME	PROBE	GENE SYMBOL	GENE_TITLE	RANK IN GENE LIST	RANK METRIC SCORE	RUNNING ES	CORE ENRICHMENT
row_0	SSR1	null	null	91	3.699057102203369	0.009031906	No
row_1	CDKN1C	null	null	751	2.522965908050537	-0.064266965	No
row_2	SFRS1	null	null	1212	2.0655879974365234	-0.10872107	No
row_3	PRDX3	null	null	1314	1.9830540418624878	-0.10113865	No
row_4	PAPOLA	null	null	1376	1.9356290102005005	-0.08775829	No
row_5	CXCL3	null	null	2012	1.5851140022277832	-0.1575784	No
row_6	RFC5	null	null	2116	1.5437209606170654	-0.15028587	No
row_7	NAP1L1	null	null	2187	1.5059319734573364	-0.13821004	No
row_8	SRI	null	null	2474	1.3915610313415527	-0.1574431	No
row_9	PTGES3	null	null	2645	1.32430899143219	-0.15986213	No
row_10	CITED2	null	null	2647	1.32430899143219	-0.13778485	No
row_11	SCYE1	null	null	2729	1.2976560592651367	-0.12730347	No
row_12	ID2	null	null	3046	1.197998046875	-0.15088499	No
row_13	ALDH7A1	null	null	3466	1.076843023300171	-0.1893962	No
row_14	SDHD	null	null	3497	1.0686290264129639	-0.17152244	No
row_15	LAMP2	null	null	3730	1.000087022781372	-0.18292826	No
row_16	TACSTD2	null	null	3855	0.9682750105857849	-0.17867967	No
row_17	SH3BGRL	null	null	4411	0.8309999704360962	-0.23690389	No
row_18	ITM2B	null	null	4641	0.7789340019226074	-0.24787489	No
row_19	RBMXL1	null	null	4746	0.7506440281867981	-0.2407273	No
row_20	DYNC2LI1	null	null	5178	0.6432960033416748	-0.2809779	No
row_21	HRSP12	null	null	5410	0.5928660035133362	-0.2922388	Yes
row_22	AGL	null	null	5413	0.5928660035133362	-0.27030647	Yes
row_23	HPRT1	null	null	5451	0.5841119885444641	-0.25344735	Yes
row_24	CCL20	null	null	5462	0.5814539790153503	-0.2326746	Yes
row_25	PDIA6	null	null	5480	0.5761860013008118	-0.21291651	Yes
row_26	CCNC	null	null	5591	0.5526189804077148	-0.20663862	Yes
row_27	UBE2E1	null	null	5614	0.5455470085144043	-0.18760528	Yes
row_28	IL6	null	null	5639	0.5397909879684448	-0.1688618	Yes
row_29	AP1S2	null	null	5691	0.5267459750175476	-0.15403196	Yes
row_30	PGK1	null	null	5716	0.5215200185775757	-0.1352885	Yes
row_31	PRKAR1A	null	null	5736	0.517212986946106	-0.1158203	Yes
row_32	RBBP4	null	null	5739	0.5166419744491577	-0.093887985	Yes
row_33	RECQL	null	null	6226	0.40064001083374023	-0.14211075	Yes
row_34	HEXIM1	null	null	6337	0.3704729974269867	-0.13583286	Yes
row_35	RCN2	null	null	6423	0.34571799635887146	-0.12593128	Yes
row_36	RRM2	null	null	6468	0.33132800459861755	-0.110086784	Yes
row_37	TAF2	null	null	6520	0.3174000084400177	-0.09525694	Yes
row_38	YWHAZ	null	null	6710	0.2554810047149658	-0.10042999	Yes
row_39	SCARB2	null	null	6759	0.23218899965286255	-0.08516529	Yes
row_40	PMAIP1	null	null	6763	0.23130099475383759	-0.06337792	Yes
row_41	PLSCR1	null	null	6773	0.22542400658130646	-0.042460233	Yes
row_42	SEPT10	null	null	6813	0.21135300397872925	-0.025891002	Yes
row_43	DYNLT3	null	null	6867	0.17271800339221954	-0.011351053	Yes
row_44	FUSIP1	null	null	6916	0.12110599875450134	0.0039136396	Yes
