# Supplementary material for: Signatures of RNA binding proteins globally coupled to effective microRNA target sites
Source: HighWire-hosted journal article supplement (doi:10.1101/gr.103259.109), 2010-05-27
Supplement: Table_S13.zip [file UVC_XPCS_4HR_DN.xls]

NAME	PROBE	GENE SYMBOL	GENE_TITLE	RANK IN GENE LIST	RANK METRIC SCORE	RUNNING ES	CORE ENRICHMENT
row_0	CREB1	null	null	46	3.699057102203369	-4.903531E-4	No
row_1	AFF1	null	null	51	3.699057102203369	0.005209419	No
row_2	DYRK1A	null	null	156	3.699057102203369	-0.0038292024	No
row_3	TRIM33	null	null	165	3.699057102203369	0.0012810341	No
row_4	MYST3	null	null	273	3.398026943206787	-0.008199739	No
row_5	ZNF148	null	null	301	3.398026943206787	-0.0058897976	No
row_6	NFIB	null	null	389	3.096997022628784	-0.012422892	No
row_7	HELZ	null	null	405	3.096997022628784	-0.008344343	No
row_8	PIP5K3	null	null	435	3.000087022781372	-0.0063291695	No
row_9	WAPAL	null	null	499	2.9209060668945312	-0.009325049	No
row_10	FCHSD2	null	null	512	2.853959083557129	-0.0048043486	No
row_11	TCF7L2	null	null	538	2.853959083557129	-0.002199639	No
row_12	FOXK2	null	null	550	2.7959671020507812	0.0024684456	No
row_13	STAM	null	null	630	2.699057102203369	-0.0028855775	No
row_14	LARP5	null	null	674	2.619875907897949	-0.0029337788	No
row_15	RNGTT	null	null	677	2.619875907897949	0.0030607614	No
row_16	NRIP1	null	null	761	2.522965908050537	-0.0028827975	No
row_17	SOCS5	null	null	770	2.494936943054199	0.002227439	No
row_18	SRPK2	null	null	780	2.494936943054199	0.007190292	No
row_19	KIF2A	null	null	861	2.398026943206787	0.0016888846	No
row_20	REV3L	null	null	863	2.398026943206787	0.007830809	No
row_21	FBXW11	null	null	875	2.376837968826294	0.012498893	No
row_22	ORC5L	null	null	891	2.3566339015960693	0.016577443	No
row_23	GNAQ	null	null	901	2.3566339015960693	0.021540295	No
row_24	PHF3	null	null	918	2.3373289108276367	0.02547146	No
row_25	KIAA0802	null	null	953	2.301116943359375	0.026749713	No
row_26	CEP170	null	null	1060	2.1805429458618164	0.017416324	No
row_27	ATF2	null	null	1106	2.142754077911377	0.017073356	No
row_28	TGFBR3	null	null	1126	2.130855083465576	0.02056237	No
row_29	NCOA3	null	null	1199	2.075808048248291	0.016240032	No
row_30	IL1RAP	null	null	1250	2.036298990249634	0.015160144	No
row_31	KIAA1128	null	null	1286	2.0088610649108887	0.016291015	No
row_32	RCOR1	null	null	1301	1.9914870262145996	0.020516947	No
row_33	EIF2C2	null	null	1364	1.9508689641952515	0.01766845	No
row_34	ZHX2	null	null	1436	1.8928769826889038	0.0134935	No
row_35	MECP2	null	null	1452	1.8795130252838135	0.017572049	No
row_36	TLK2	null	null	1471	1.8729820251464844	0.021208445	No
row_37	CDYL	null	null	1480	1.86654794216156	0.026318682	No
row_38	RAPGEF2	null	null	1489	1.8602080345153809	0.03142892	No
row_39	KIAA0182	null	null	1490	1.8602080345153809	0.037718225	No
row_40	ZNF292	null	null	1528	1.8357340097427368	0.03855433	No
row_41	MARCH7	null	null	1548	1.8239959478378296	0.042043343	No
row_42	CD2AP	null	null	1685	1.754573941230774	0.028288435	No
row_43	PUM2	null	null	1689	1.754573941230774	0.03413559	No
row_44	BTRC	null	null	1791	1.6990569829940796	0.02553912	No
row_45	TIPARP	null	null	1813	1.6862200498580933	0.028733367	No
row_46	HMG2L1	null	null	1960	1.6091519594192505	0.01350462	No
row_47	CHSY1	null	null	1962	1.6091519594192505	0.019646544	No
row_48	MTF2	null	null	2009	1.5851140022277832	0.01915619	No
row_49	CEP135	null	null	2135	1.5317399501800537	0.007022506	No
row_50	CAMSAP1L1	null	null	2145	1.5229660272598267	0.011985359	No
row_51	PCTK2	null	null	2173	1.5143649578094482	0.0142953005	No
row_52	SOS2	null	null	2222	1.489542007446289	0.01351018	No
row_53	WNT5A	null	null	2257	1.4711699485778809	0.014788434	No
row_54	WDR43	null	null	2286	1.4610110521316528	0.016950991	No
row_55	EGFR	null	null	2330	1.4462039470672607	0.01690279	No
row_56	NAV3	null	null	2346	1.4413779973983765	0.02098134	No
row_57	DAPK1	null	null	2382	1.4272149801254272	0.02211221	No
row_58	BAZ2B	null	null	2448	1.4002039432525635	0.018821562	No
row_59	HIRA	null	null	2457	1.398026943206787	0.023931798	No
row_60	USP6	null	null	2501	1.3809939622879028	0.023883596	No
row_61	ANKRD17	null	null	2524	1.3727209568023682	0.026930457	No
row_62	E2F5	null	null	2557	1.3605999946594238	0.02850348	No
row_63	GLRB	null	null	2641	1.3279889822006226	0.02255992	No
row_64	TOPBP1	null	null	2711	1.3063600063323975	0.018679738	No
row_65	VPS13B	null	null	2732	1.2959359884262085	0.022021366	No
row_66	PARG	null	null	2768	1.2824159860610962	0.023152236	No
row_67	MYC	null	null	2825	1.2628940343856812	0.021188045	No
row_68	ATP2B1	null	null	2862	1.251899003982544	0.02217153	No
row_69	ARHGAP29	null	null	2922	1.2336740493774414	0.019765187	No
row_70	FYN	null	null	3120	1.1740119457244873	-0.0029801414	No
row_71	NUAK1	null	null	3151	1.166301965713501	-0.0011123515	No
row_72	PAFAH1B1	null	null	3254	1.1379549503326416	-0.009856205	No
row_73	AHDC1	null	null	3263	1.1355760097503662	-0.0047459686	No
row_74	FGF2	null	null	3349	1.112470030784607	-0.010984295	No
row_75	HEG1	null	null	3557	1.0526529550552368	-0.03520346	No
row_76	RASA1	null	null	3576	1.0477789640426636	-0.031567067	No
row_77	BLM	null	null	3589	1.0420010089874268	-0.027046364	No
row_78	PBX3	null	null	3597	1.0400919914245605	-0.021788744	No
row_79	TRIO	null	null	3610	1.0334759950637817	-0.017268043	No
row_80	BAZ1A	null	null	3714	1.005329966545105	-0.02615928	No
row_81	ATXN2	null	null	3753	0.9940490126609802	-0.025470562	No
row_82	ZHX3	null	null	3779	0.9872499704360962	-0.022865852	No
row_83	ARHGAP12	null	null	3925	0.9485480189323425	-0.037947215	No
row_84	NCOA1	null	null	4077	0.910181999206543	-0.05391288	No
row_85	BMPR1A	null	null	4109	0.8990269899368286	-0.052192476	No
row_86	KIAA0922	null	null	4263	0.8646360039710999	-0.06845291	No
row_87	KIAA1199	null	null	4282	0.8614680171012878	-0.06481651	No
row_88	HOXB2	null	null	4320	0.8521019816398621	-0.06398041	No
row_89	MYO10	null	null	4409	0.8309999704360962	-0.07066089	No
row_90	ANKS1A	null	null	4420	0.829239010810852	-0.06584542	No
row_91	CHD1	null	null	4491	0.8159629702568054	-0.06987299	No
row_92	STARD13	null	null	4534	0.8008800148963928	-0.06977381	No
row_93	CBLB	null	null	4597	0.7884320020675659	-0.0726223	No
row_94	PRR3	null	null	4810	0.7362139821052551	-0.09757839	No
row_95	PHLPP	null	null	4855	0.7240849733352661	-0.09777398	No
row_96	BHLHB2	null	null	4885	0.7145299911499023	-0.0957588	No
row_97	FRYL	null	null	4910	0.7065029740333557	-0.09300671	No
row_98	FNDC3A	null	null	4988	0.6908829808235168	-0.098065965	No
row_99	DNMBP	null	null	5045	0.6770409941673279	-0.100030154	No
row_100	DLC1	null	null	5048	0.6762160062789917	-0.09403561	No
row_101	MYST4	null	null	5131	0.653734028339386	-0.09983179	No
row_102	APPBP2	null	null	5262	0.6253389716148376	-0.11270239	No
row_103	CENPA	null	null	5331	0.6091520190238953	-0.11643519	No
row_104	TP53BP2	null	null	5358	0.6049349904060364	-0.113977864	No
row_105	CENPE	null	null	5504	0.5719519853591919	-0.12905923	Yes
row_106	BCAR3	null	null	5523	0.567438006401062	-0.12542284	Yes
row_107	AKAP9	null	null	5558	0.5598080158233643	-0.12414458	Yes
row_108	SCHIP1	null	null	5572	0.5560420155525208	-0.119771264	Yes
row_109	IL6	null	null	5639	0.5397909879684448	-0.12320929	Yes
row_110	ACVR1	null	null	5655	0.535597026348114	-0.119130746	Yes
row_111	MEIS2	null	null	5657	0.5344070196151733	-0.11298882	Yes
row_112	CTGF	null	null	5671	0.5320349931716919	-0.1086155	Yes
row_113	CREBBP	null	null	5683	0.5290889739990234	-0.103947416	Yes
row_114	CNOT2	null	null	5713	0.5218089818954468	-0.10193224	Yes
row_115	IRAK1BP1	null	null	5717	0.521232008934021	-0.09608509	Yes
row_116	SRGAP2	null	null	5729	0.5183579921722412	-0.09141701	Yes
row_117	F3	null	null	5770	0.5087249875068665	-0.09102306	Yes
row_118	WDR37	null	null	5780	0.5070469975471497	-0.0860602	Yes
row_119	FXR1	null	null	5817	0.5009499788284302	-0.08507671	Yes
row_120	RBM16	null	null	5839	0.4962959885597229	-0.08188247	Yes
row_121	CENPC1	null	null	5857	0.49223101139068604	-0.07809869	Yes
row_122	TUBGCP3	null	null	5858	0.4919610023498535	-0.07180938	Yes
row_123	DOCK4	null	null	5868	0.4903469979763031	-0.06684653	Yes
row_124	ZMYM2	null	null	5876	0.4876689910888672	-0.06158891	Yes
row_125	TIAM1	null	null	5890	0.4815729856491089	-0.05721559	Yes
row_126	MTMR3	null	null	5928	0.4750419855117798	-0.05637949	Yes
row_127	TLE4	null	null	5930	0.4750419855117798	-0.050237566	Yes
row_128	CEP350	null	null	5969	0.46428701281547546	-0.049548846	Yes
row_129	CNOT4	null	null	6035	0.44985800981521606	-0.052839495	Yes
row_130	FGF5	null	null	6059	0.44426700472831726	-0.049940016	Yes
row_131	ZZZ3	null	null	6087	0.4389849901199341	-0.047630075	Yes
row_132	NCK1	null	null	6107	0.434239000082016	-0.04414106	Yes
row_133	IFRD1	null	null	6109	0.4337669909000397	-0.03799914	Yes
row_134	ARFGEF1	null	null	6139	0.42559298872947693	-0.035983965	Yes
row_135	GNAI1	null	null	6141	0.42466801404953003	-0.029842041	Yes
row_136	NUP153	null	null	6214	0.4068009853363037	-0.034164377	Yes
row_137	EXT1	null	null	6215	0.4068009853363037	-0.027875068	Yes
row_138	CLASP2	null	null	6232	0.3980270028114319	-0.023943903	Yes
row_139	RBM39	null	null	6245	0.3949970006942749	-0.019423202	Yes
row_140	PTPN12	null	null	6250	0.3928459882736206	-0.01372343	Yes
row_141	SNX13	null	null	6262	0.38751500844955444	-0.009055345	Yes
row_142	NIPBL	null	null	6274	0.3851900100708008	-0.004387261	Yes
row_143	CCDC93	null	null	6362	0.36440199613571167	-0.010920355	Yes
row_144	CTBP2	null	null	6385	0.3576219975948334	-0.007873494	Yes
row_145	SMURF2	null	null	6438	0.3416939973831177	-0.0092481505	Yes
row_146	STK3	null	null	6459	0.33525699377059937	-0.0059065213	Yes
row_147	IGF1R	null	null	6570	0.30129098892211914	-0.015829446	Yes
row_148	SOS1	null	null	6576	0.3004229962825775	-0.010277058	Yes
row_149	EPHA4	null	null	6591	0.29439398646354675	-0.0060511255	Yes
row_150	LHFPL2	null	null	6629	0.2827489972114563	-0.005215023	Yes
row_151	PTPRK	null	null	6712	0.25345298647880554	-0.011011198	Yes
row_152	TMCC1	null	null	6735	0.2449750006198883	-0.007964336	Yes
row_153	TRIM2	null	null	6750	0.2354619950056076	-0.0037384038	Yes
row_154	TLK1	null	null	6778	0.22411300241947174	-0.0014284621	Yes
row_155	MALT1	null	null	6800	0.21661199629306793	0.0017657832	Yes
row_156	MID1	null	null	6837	0.20281900465488434	0.0027492694	Yes
row_157	MTAP	null	null	6844	0.1936360001564026	0.008154274	Yes
row_158	USP15	null	null	6855	0.18397800624370575	0.0129697425	Yes
