# Supplementary material for: Signatures of RNA binding proteins globally coupled to effective microRNA target sites
Source: HighWire-hosted journal article supplement (doi:10.1101/gr.103259.109), 2010-05-27
Supplement: Table_S13.zip [file VHL_RCC_UP.xls]

NAME	PROBE	GENE SYMBOL	GENE_TITLE	RANK IN GENE LIST	RANK METRIC SCORE	RUNNING ES	CORE ENRICHMENT
row_0	EWSR1	null	null	115	3.699057102203369	0.008986427	Yes
row_1	SERBP1	null	null	145	3.699057102203369	0.030427597	Yes
row_2	GATAD2B	null	null	149	3.699057102203369	0.055634156	Yes
row_3	SLC7A5	null	null	468	3.000087022781372	0.035221595	Yes
row_4	PTBP1	null	null	664	2.6576640605926514	0.032622218	Yes
row_5	RHOB	null	null	788	2.494936943054199	0.040450063	Yes
row_6	CANX	null	null	924	2.3373289108276367	0.04654004	Yes
row_7	PAQR3	null	null	961	2.301116943359375	0.06696745	Yes
row_8	LAMP1	null	null	1132	2.130855083465576	0.067988634	Yes
row_9	CAPN1	null	null	1145	2.1192729473114014	0.09189179	Yes
row_10	UACA	null	null	1561	1.8182430267333984	0.05743144	Yes
row_11	CDK2	null	null	1721	1.7352689504623413	0.060045674	Yes
row_12	FBXL5	null	null	1757	1.7167860269546509	0.080617905	Yes
row_13	PHF17	null	null	1860	1.665632963180542	0.09148703	Yes
row_14	SLC3A2	null	null	1926	1.6235100030899048	0.107714586	Yes
row_15	SS18	null	null	2148	1.5229660272598267	0.101349816	Yes
row_16	RAB14	null	null	2153	1.5229660272598267	0.12641156	Yes
row_17	RNF20	null	null	2215	1.492231011390686	0.1432184	Yes
row_18	PECR	null	null	2219	1.492231011390686	0.16842496	Yes
row_19	STK24	null	null	2287	1.4610110521316528	0.18436287	Yes
row_20	OXA1L	null	null	2299	1.4560190439224243	0.20841084	Yes
row_21	COTL1	null	null	2622	1.333569049835205	0.187419	Yes
row_22	GMFB	null	null	2639	1.3279889822006226	0.21074286	Yes
row_23	BCL7B	null	null	2648	1.3224799633026123	0.2352253	Yes
row_24	C9ORF30	null	null	2691	1.3116669654846191	0.25478378	Yes
row_25	SCYE1	null	null	2729	1.2976560592651367	0.27506638	Yes
row_26	VAPB	null	null	2788	1.275810956954956	0.2923077	Yes
row_27	PDGFRA	null	null	2865	1.2503509521484375	0.3069422	Yes
row_28	TMEM50A	null	null	3043	1.19937002658844	0.30694962	Yes
row_29	AHDC1	null	null	3263	1.1355760097503662	0.3008745	No
row_30	PATZ1	null	null	4185	0.8814910054206848	0.19313392	No
row_31	C21ORF59	null	null	4443	0.8257359862327576	0.18155554	No
row_32	GTF2A2	null	null	4485	0.8176720142364502	0.20125884	No
row_33	HMGN2	null	null	4797	0.7390620112419128	0.18186003	No
row_34	RANBP9	null	null	5978	0.4612619876861572	0.0366104	No
row_35	BCOR	null	null	6205	0.4083549976348877	0.02952152	No
row_36	TES	null	null	6282	0.38350600004196167	0.04415603	No
row_37	SCARB2	null	null	6759	0.23218899965286255	8.614984E-4	No
row_38	AZIN1	null	null	6868	0.1711689978837967	0.010861684	No
