# Supplementary material for: Signatures of RNA binding proteins globally coupled to effective microRNA target sites
Source: HighWire-hosted journal article supplement (doi:10.1101/gr.103259.109), 2010-05-27
Supplement: Table_S13.zip [file WALKER_MM_SNP_DIFF.xls]

NAME	PROBE	GENE SYMBOL	GENE_TITLE	RANK IN GENE LIST	RANK METRIC SCORE	RUNNING ES	CORE ENRICHMENT
row_0	HMGB1	null	null	176	3.699057102203369	0.024581168	Yes
row_1	ATP11A	null	null	501	2.9209060668945312	0.02778741	Yes
row_2	MYB	null	null	644	2.699057102203369	0.057279035	Yes
row_3	SOX12	null	null	724	2.552928924560547	0.095869444	Yes
row_4	MAF	null	null	764	2.522965908050537	0.14023687	Yes
row_5	LAMP1	null	null	1132	2.130855083465576	0.13723283	Yes
row_6	HERPUD1	null	null	1386	1.9282050132751465	0.15069325	Yes
row_7	CNGB1	null	null	1688	1.754573941230774	0.15722127	Yes
row_8	RPL13	null	null	2071	1.556041955947876	0.15205085	Yes
row_9	STK24	null	null	2287	1.4610110521316528	0.17099944	Yes
row_10	SAP18	null	null	2416	1.4157559871673584	0.20251302	Yes
row_11	ZIC2	null	null	2476	1.3915610313415527	0.24399193	Yes
row_12	TM9SF2	null	null	2533	1.3706769943237305	0.2859041	Yes
row_13	ESR1	null	null	2707	1.3063600063323975	0.31091857	Yes
row_14	ASAH1	null	null	2811	1.267693042755127	0.34604278	Yes
row_15	ZFP36L1	null	null	2834	1.2597240209579468	0.39286542	Yes
row_16	PTP4A1	null	null	3760	0.9914870262145996	0.30927214	No
row_17	WTAP	null	null	5367	0.6018000245094299	0.12732528	No
row_18	DSTN	null	null	5796	0.5048199892044067	0.115511306	No
row_19	MAP1LC3B	null	null	5948	0.4721989929676056	0.1437031	No
