# Supplementary material for: Signatures of RNA binding proteins globally coupled to effective microRNA target sites
Source: HighWire-hosted journal article supplement (doi:10.1101/gr.103259.109), 2010-05-27
Supplement: Table_S13.zip [file ZINC_ION_BINDING.xls]

NAME	PROBE	GENE SYMBOL	GENE_TITLE	RANK IN GENE LIST	RANK METRIC SCORE	RUNNING ES	CORE ENRICHMENT
row_0	LIMD1	null	null	492	2.9209060668945312	-0.04088783	No
row_1	BIRC5	null	null	1037	2.2076950073242188	-0.089299895	No
row_2	MSRB2	null	null	1271	2.0178160667419434	-0.09271123	No
row_3	MYNN	null	null	1760	1.7167860269546509	-0.13302027	No
row_4	SIAH1	null	null	1881	1.6537339687347412	-0.120080866	No
row_5	MMP16	null	null	3304	1.125025987625122	-0.2955368	Yes
row_6	TRPS1	null	null	3324	1.1192729473114014	-0.267983	Yes
row_7	SLU7	null	null	3573	1.0477789640426636	-0.2735648	Yes
row_8	LTA4H	null	null	3846	0.9698920249938965	-0.2826193	Yes
row_9	RNF11	null	null	3928	0.9477779865264893	-0.26403672	Yes
row_10	MMP13	null	null	4135	0.8921989798545837	-0.26354122	Yes
row_11	MDM2	null	null	4206	0.8775429725646973	-0.24336699	Yes
row_12	ZFPM2	null	null	4340	0.8477990031242371	-0.23230864	Yes
row_13	MNAT1	null	null	4356	0.8429319858551025	-0.20417605	Yes
row_14	RNF4	null	null	4458	0.8228390216827393	-0.18848741	Yes
row_15	LNPEP	null	null	4498	0.8148279786109924	-0.16382755	Yes
row_16	CBLB	null	null	4597	0.7884320020675659	-0.14770482	Yes
row_17	TIMM9	null	null	4618	0.7836570143699646	-0.120295726	Yes
row_18	BRCA1	null	null	4870	0.7185990214347839	-0.1263116	Yes
row_19	PRDM4	null	null	5022	0.682440996170044	-0.1178578	Yes
row_20	CA12	null	null	5165	0.6455940008163452	-0.108101726	Yes
row_21	ZNF185	null	null	5173	0.6436790227890015	-0.07881157	Yes
row_22	ZEB1	null	null	5200	0.638359010219574	-0.052270662	Yes
row_23	CTCF	null	null	5463	0.5814539790153503	-0.059878208	Yes
row_24	RABIF	null	null	5759	0.5121009945869446	-0.07226075	Yes
row_25	PEX12	null	null	5898	0.4802590012550354	-0.061925888	Yes
row_26	CA2	null	null	6012	0.45403799414634705	-0.047973603	Yes
row_27	YY1	null	null	6161	0.41961801052093506	-0.03908571	Yes
row_28	ZNF146	null	null	6236	0.39737600088119507	-0.019490246	Yes
row_29	GDA	null	null	6395	0.35407501459121704	-0.01204932	Yes
row_30	MSRB3	null	null	6508	0.31975099444389343	0.0020476617	Yes
row_31	ADH1B	null	null	6753	0.23411999642848969	-0.0029553429	Yes
row_32	EEA1	null	null	6926	0.113257996737957	0.0024598273	Yes
